# Supplementary material for: Flexible open conformation of the AP-3 complex explains its role in cargo recruitment at the Golgi
Source: PubMed Central journal article supplement (PMC8591511; doi:10.1016/j.jbc.2021.101334), 2021-10-22
Supplement: mmc8.pdf [file mmc8.pdf]

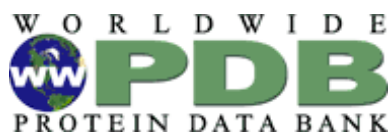

## Full wwPDB EM Validation Report ⓘ

Jul 22, 2021 – 03:22 pm BST

PDB ID : 7P3Z  
EMDB ID : EMD-13189  
Title : Homology model of the full-length AP-3 complex in a stretched open conformation  
Deposited on : 2021-07-09  
Resolution : 10.50 Å (reported)

This is a Full wwPDB EM Validation Report.

This report is produced by the wwPDB biocuration pipeline after annotation of the structure.

We welcome your comments at [validation@mail.wwpdb.org](mailto:validation@mail.wwpdb.org)

A user guide is available at

<https://www.wwpdb.org/validation/2017/EMValidationReportHelp>

with specific help available everywhere you see the ⓘ symbol.

---

The following versions of software and data (see [references ⓘ](#)) were used in the production of this report:

EMDB validation analysis : 0.0.0.dev84  
MolProbity : 4.02b-467  
Percentile statistics : 20191225.v01 (using entries in the PDB archive December 25th 2019)  
Ideal geometry (proteins) : Engh & Huber (2001)  
Ideal geometry (DNA, RNA) : Parkinson et al. (1996)  
Validation Pipeline (wwPDB-VP) : 2.22

# 1 Overall quality at a glance i

The following experimental techniques were used to determine the structure:  
*ELECTRON MICROSCOPY*

The reported resolution of this entry is 10.50 Å.

Percentile scores (ranging between 0-100) for global validation metrics of the entry are shown in the following graphic. The table shows the number of entries on which the scores are based.

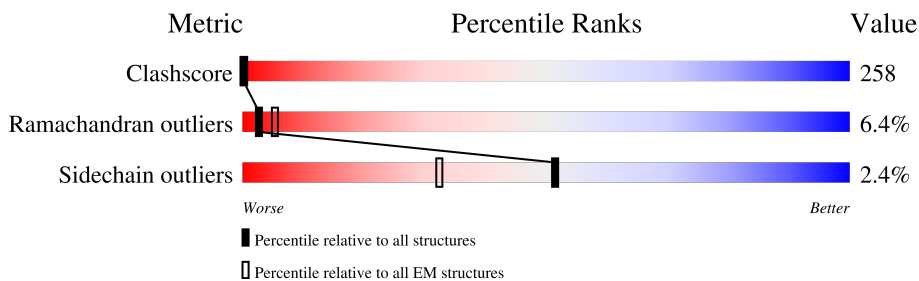

| Metric                | Whole archive (#Entries) | EM structures (#Entries) |
|-----------------------|--------------------------|--------------------------|
| Clashscore            | 158937                   | 4297                     |
| Ramachandran outliers | 154571                   | 4023                     |
| Sidechain outliers    | 154315                   | 3826                     |

The table below summarises the geometric issues observed across the polymeric chains and their fit to the map. The red, orange, yellow and green segments of the bar indicate the fraction of residues that contain outliers for  $\geq 3$ , 2, 1 and 0 types of geometric quality criteria respectively. A grey segment represents the fraction of residues that are not modelled. The numeric value for each fraction is indicated below the corresponding segment, with a dot representing fractions  $\leq 5\%$ . The upper red bar (where present) indicates the fraction of residues that have poor fit to the EM map (all-atom inclusion  $< 40\%$ ). The numeric value is given above the bar.

| Mol | Chain | Length | Quality of chain                                                                                                                                                                                                                                                                                                                                                                                                                                                                                                                                                |
|-----|-------|--------|-----------------------------------------------------------------------------------------------------------------------------------------------------------------------------------------------------------------------------------------------------------------------------------------------------------------------------------------------------------------------------------------------------------------------------------------------------------------------------------------------------------------------------------------------------------------|
| 1   | A     | 964    | <div style="display: flex; justify-content: space-between; align-items: center;"> <div style="text-align: right;">17%</div> <div style="width: 100%; height: 15px; background: linear-gradient(to right, red, orange, yellow, green, grey); position: relative;"> <span style="position: absolute; left: 20%; top: -10px;">20%</span> <span style="position: absolute; left: 31%; top: -10px;">31%</span> <span style="position: absolute; left: 64%; top: -10px;">6%</span> <span style="position: absolute; left: 80%; top: -10px;">40%</span> </div> </div>  |
| 2   | B     | 809    | <div style="display: flex; justify-content: space-between; align-items: center;"> <div style="text-align: right;">30%</div> <div style="width: 100%; height: 15px; background: linear-gradient(to right, red, orange, yellow, green, grey); position: relative;"> <span style="position: absolute; left: 25%; top: -10px;">25%</span> <span style="position: absolute; left: 42%; top: -10px;">42%</span> <span style="position: absolute; left: 79%; top: -10px;">7%</span> <span style="position: absolute; left: 92%; top: -10px;">23%</span> </div> </div>  |
| 3   | M     | 483    | <div style="display: flex; justify-content: space-between; align-items: center;"> <div style="text-align: right;">27%</div> <div style="width: 100%; height: 15px; background: linear-gradient(to right, red, orange, yellow, green, grey); position: relative;"> <span style="position: absolute; left: 10%; top: -10px;">10%</span> <span style="position: absolute; left: 48%; top: -10px;">48%</span> <span style="position: absolute; left: 88%; top: -10px;">20%</span> <span style="position: absolute; left: 97%; top: -10px;">19%</span> </div> </div> |
| 4   | S     | 194    | <div style="display: flex; justify-content: space-between; align-items: center;"> <div style="text-align: right;">32%</div> <div style="width: 100%; height: 15px; background: linear-gradient(to right, red, orange, yellow, green, grey); position: relative;"> <span style="position: absolute; left: 7%; top: -10px;">7%</span> <span style="position: absolute; left: 38%; top: -10px;">38%</span> <span style="position: absolute; left: 85%; top: -10px;">37%</span> <span style="position: absolute; left: 97%; top: -10px;">13%</span> </div> </div>   |

## 2 Entry composition

There are 4 unique types of molecules in this entry. The entry contains 14041 atoms, of which 0 are hydrogens and 0 are deuteriums.

In the tables below, the AltConf column contains the number of residues with at least one atom in alternate conformation and the Trace column contains the number of residues modelled with at most 2 atoms.

- Molecule 1 is a protein called AP-3 complex subunit delta.

| Mol | Chain | Residues | Atoms |      |     |     |    | AltConf | Trace |
|-----|-------|----------|-------|------|-----|-----|----|---------|-------|
|     |       |          | Total | C    | N   | O   | S  |         |       |
| 1   | A     | 576      | 4625  | 2978 | 738 | 881 | 28 | 0       | 0     |

There are 32 discrepancies between the modelled and reference sequences:

| Chain | Residue | Modelled | Actual | Comment        | Reference      |
|-------|---------|----------|--------|----------------|----------------|
| A     | 933     | ARG      | -      | expression tag | UNP A0A7I9C4X2 |
| A     | 934     | THR      | -      | expression tag | UNP A0A7I9C4X2 |
| A     | 935     | LEU      | -      | expression tag | UNP A0A7I9C4X2 |
| A     | 936     | GLN      | -      | expression tag | UNP A0A7I9C4X2 |
| A     | 937     | VAL      | -      | expression tag | UNP A0A7I9C4X2 |
| A     | 938     | ASP      | -      | expression tag | UNP A0A7I9C4X2 |
| A     | 939     | GLY      | -      | expression tag | UNP A0A7I9C4X2 |
| A     | 940     | SER      | -      | expression tag | UNP A0A7I9C4X2 |
| A     | 941     | ASP      | -      | expression tag | UNP A0A7I9C4X2 |
| A     | 942     | TYR      | -      | expression tag | UNP A0A7I9C4X2 |
| A     | 943     | LYS      | -      | expression tag | UNP A0A7I9C4X2 |
| A     | 944     | ASP      | -      | expression tag | UNP A0A7I9C4X2 |
| A     | 945     | ASP      | -      | expression tag | UNP A0A7I9C4X2 |
| A     | 946     | ASP      | -      | expression tag | UNP A0A7I9C4X2 |
| A     | 947     | ASP      | -      | expression tag | UNP A0A7I9C4X2 |
| A     | 948     | LYS      | -      | expression tag | UNP A0A7I9C4X2 |
| A     | 949     | ASP      | -      | expression tag | UNP A0A7I9C4X2 |
| A     | 950     | TYR      | -      | expression tag | UNP A0A7I9C4X2 |
| A     | 951     | LYS      | -      | expression tag | UNP A0A7I9C4X2 |
| A     | 952     | ASP      | -      | expression tag | UNP A0A7I9C4X2 |
| A     | 953     | ASP      | -      | expression tag | UNP A0A7I9C4X2 |
| A     | 954     | ASP      | -      | expression tag | UNP A0A7I9C4X2 |
| A     | 955     | ASP      | -      | expression tag | UNP A0A7I9C4X2 |
| A     | 956     | LYS      | -      | expression tag | UNP A0A7I9C4X2 |
| A     | 957     | ASP      | -      | expression tag | UNP A0A7I9C4X2 |
| A     | 958     | TYR      | -      | expression tag | UNP A0A7I9C4X2 |
| A     | 959     | LYS      | -      | expression tag | UNP A0A7I9C4X2 |
| A     | 960     | ASP      | -      | expression tag | UNP A0A7I9C4X2 |

*Continued on next page...*

*Continued from previous page...*

| Chain | Residue | Modelled | Actual | Comment        | Reference      |
|-------|---------|----------|--------|----------------|----------------|
| A     | 961     | ASP      | -      | expression tag | UNP A0A7I9C4X2 |
| A     | 962     | ASP      | -      | expression tag | UNP A0A7I9C4X2 |
| A     | 963     | ASP      | -      | expression tag | UNP A0A7I9C4X2 |
| A     | 964     | LYS      | -      | expression tag | UNP A0A7I9C4X2 |

- Molecule 2 is a protein called Y55\_G0035830.mRNA.1.CDS.1.

| Mol | Chain | Residues | Atoms |      |     |     |    | AltConf | Trace |
|-----|-------|----------|-------|------|-----|-----|----|---------|-------|
|     |       |          | Total | C    | N   | O   | S  |         |       |
| 2   | B     | 621      | 4954  | 3160 | 830 | 936 | 28 | 0       | 0     |

- Molecule 3 is a protein called AP-3 complex subunit mu.

| Mol | Chain | Residues | Atoms |      |     |     |    | AltConf | Trace |
|-----|-------|----------|-------|------|-----|-----|----|---------|-------|
|     |       |          | Total | C    | N   | O   | S  |         |       |
| 3   | M     | 391      | 3106  | 1986 | 509 | 599 | 12 | 0       | 0     |

- Molecule 4 is a protein called AP complex subunit sigma.

| Mol | Chain | Residues | Atoms |     |     |     |   | AltConf | Trace |
|-----|-------|----------|-------|-----|-----|-----|---|---------|-------|
|     |       |          | Total | C   | N   | O   | S |         |       |
| 4   | S     | 168      | 1356  | 867 | 215 | 270 | 4 | 0       | 0     |

### 3 Residue-property plots

These plots are drawn for all protein, RNA, DNA and oligosaccharide chains in the entry. The first graphic for a chain summarises the proportions of the various outlier classes displayed in the second graphic. The second graphic shows the sequence view annotated by issues in geometry and atom inclusion in map density. Residues are color-coded according to the number of geometric quality criteria for which they contain at least one outlier: green = 0, yellow = 1, orange = 2 and red = 3 or more. A red diamond above a residue indicates a poor fit to the EM map for this residue (all-atom inclusion < 40%). Stretches of 2 or more consecutive residues without any outlier are shown as a green connector. Residues present in the sample, but not in the model, are shown in grey.

- Molecule 1: AP-3 complex subunit delta

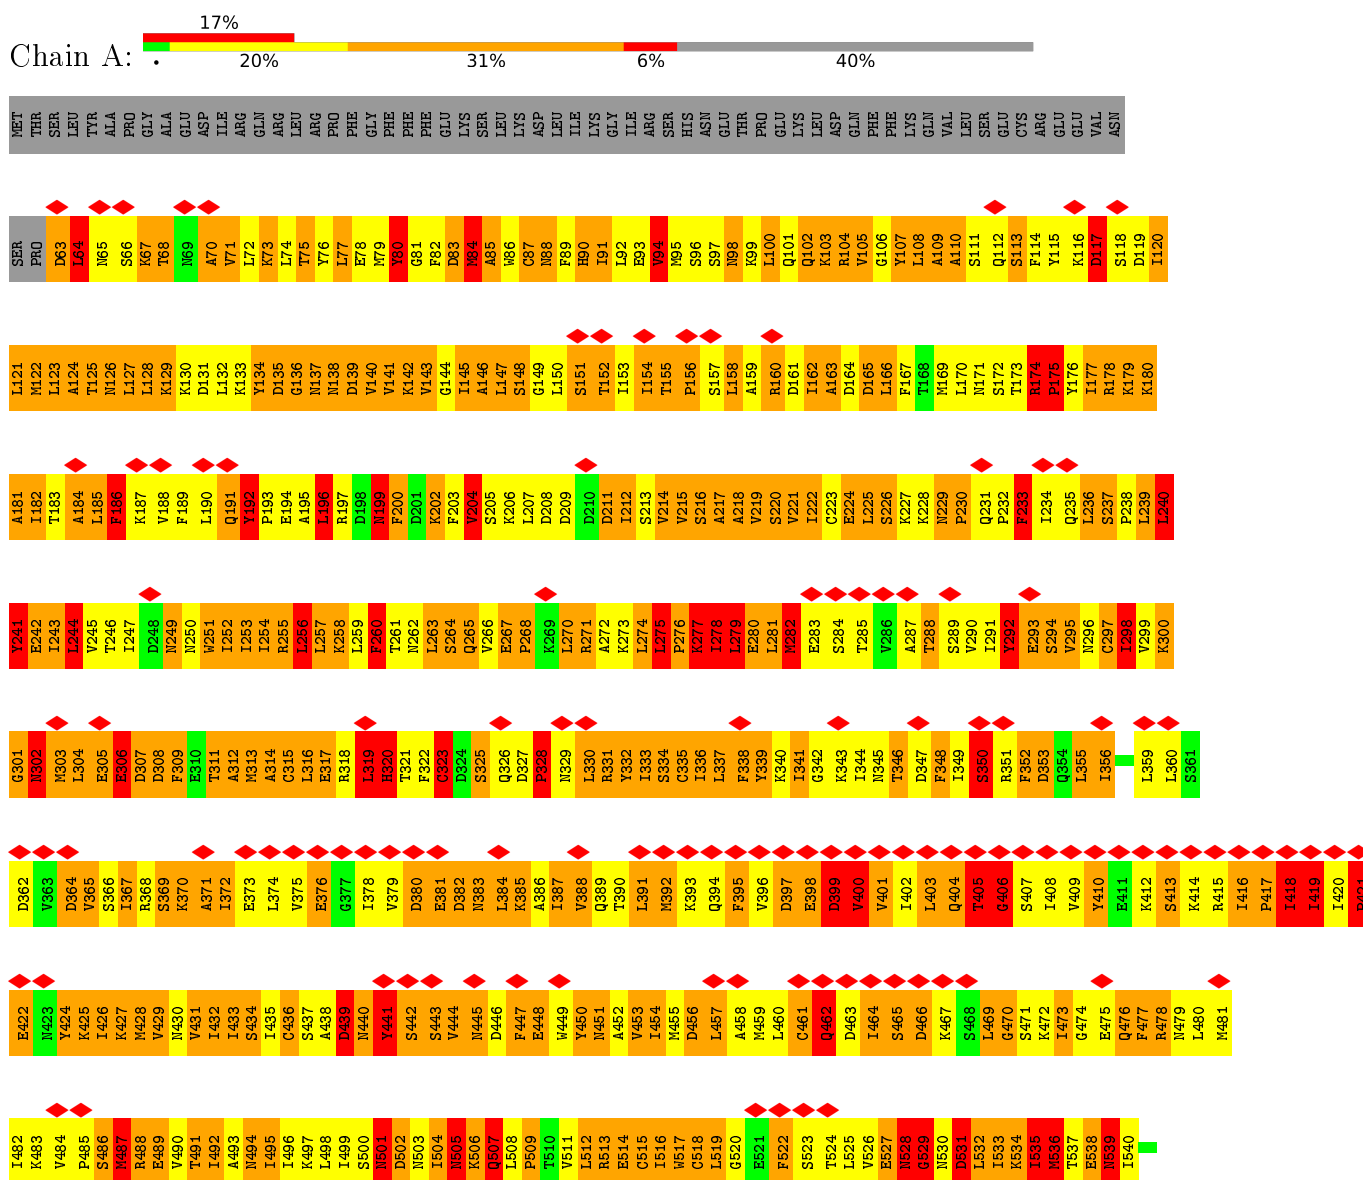

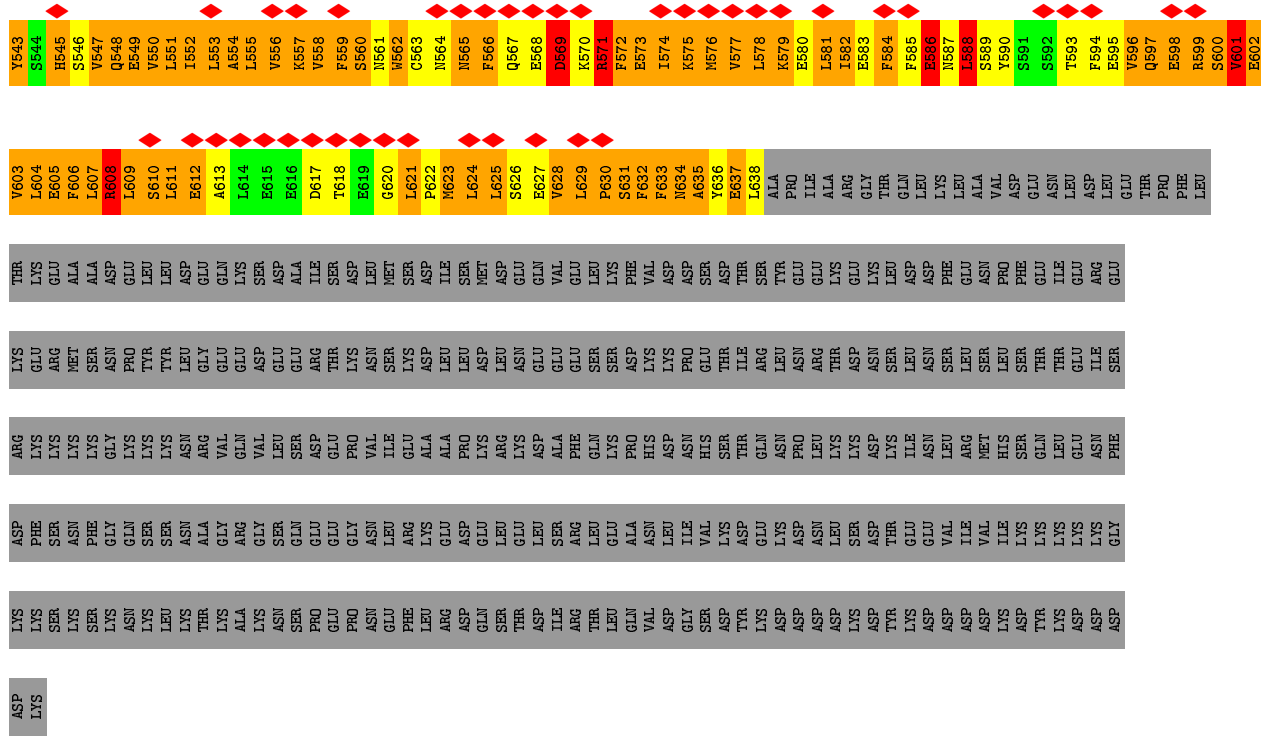

• Molecule 2: Y55\_G0035830.mRNA.1.CDS.1

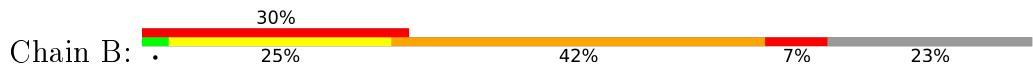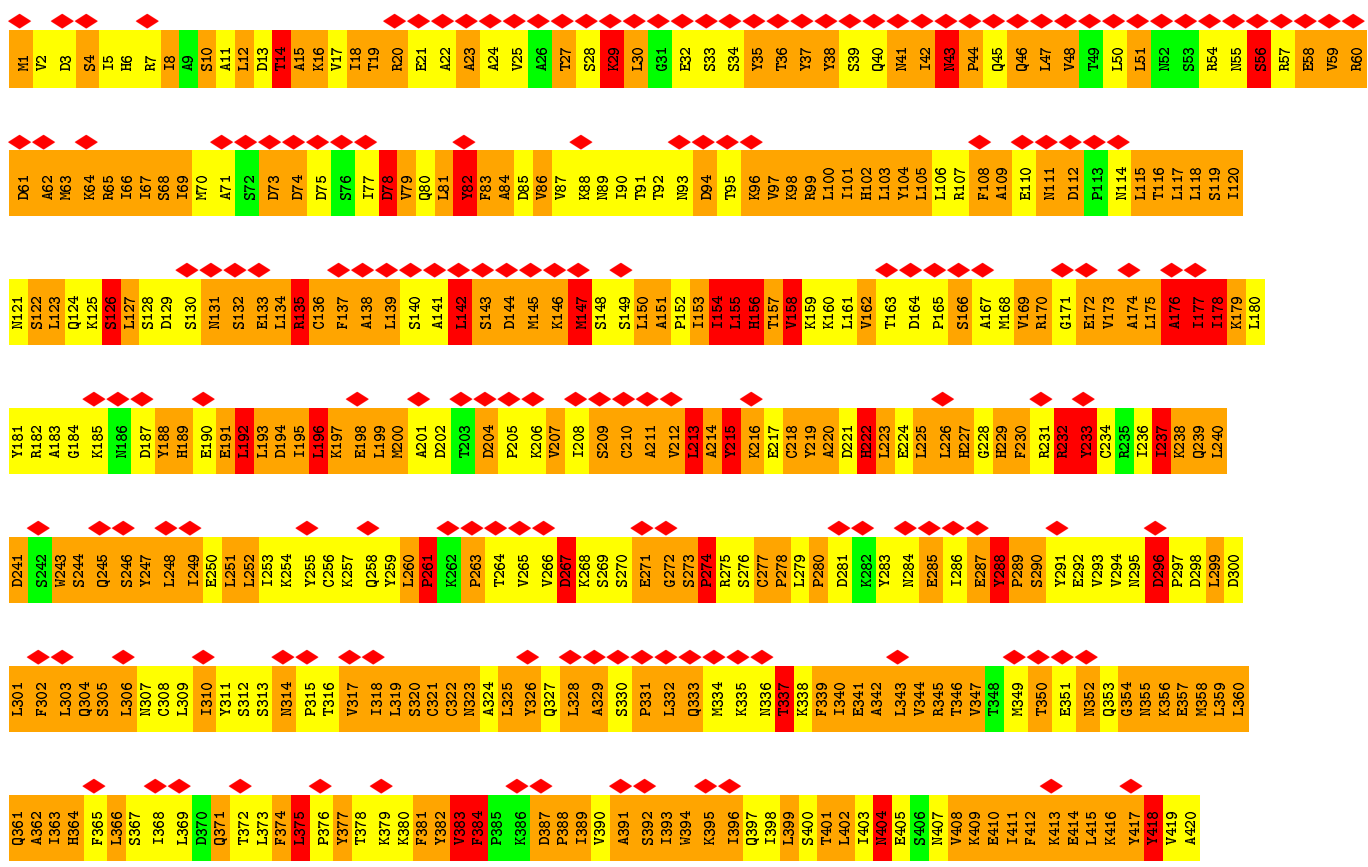

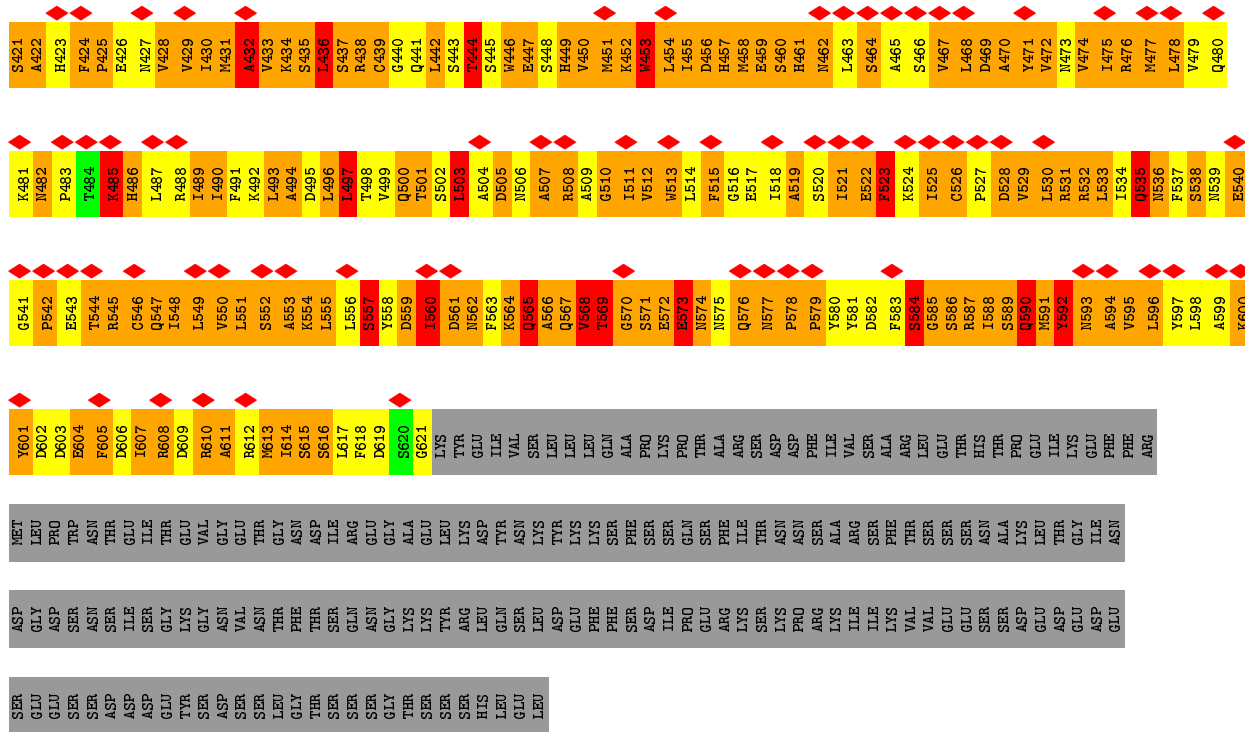

- Molecule 3: AP-3 complex subunit mu

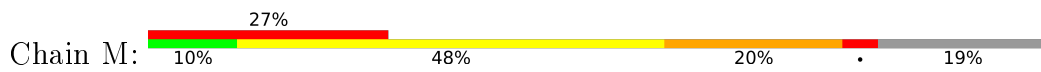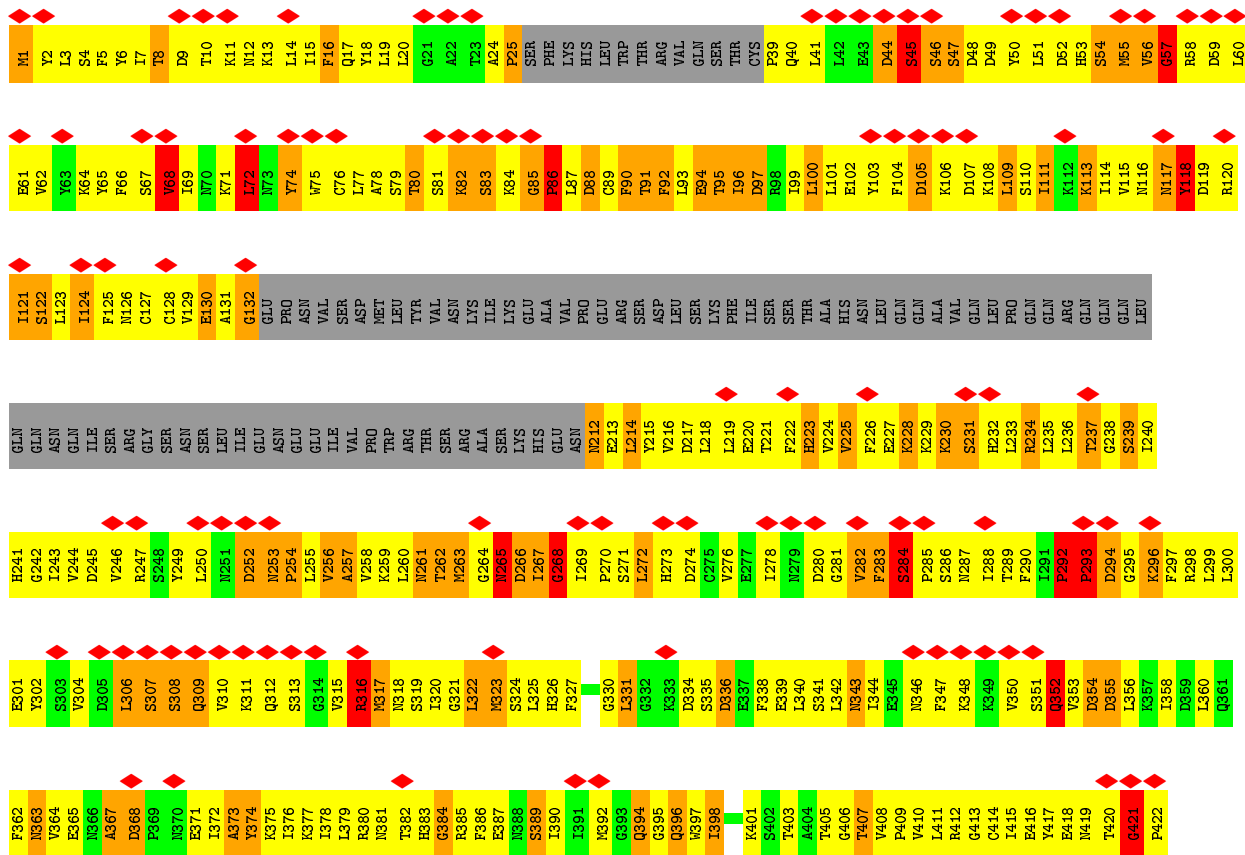

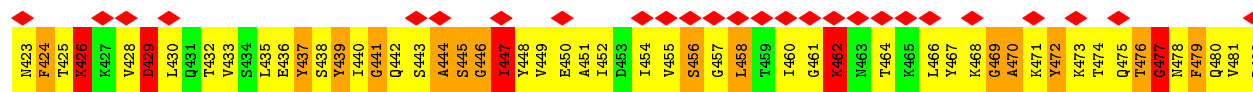

L483

• Molecule 4: AP complex subunit sigma

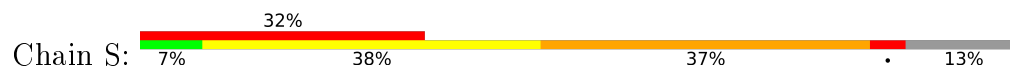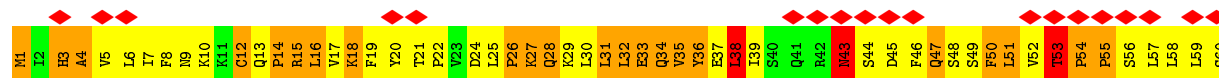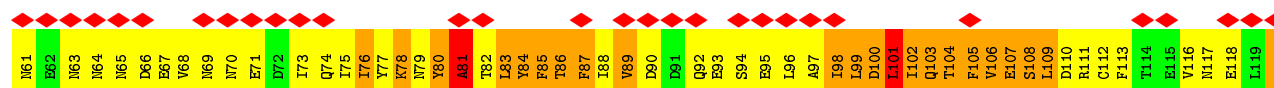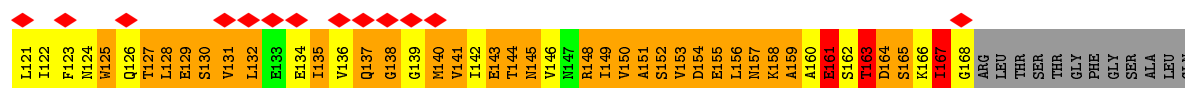

ALA  
PHE  
ALA  
GLN  
GLY  
GLY  
PHE  
ALA  
GLN  
TRP  
ALA  
THR  
GLY  
GLN



## 4 Experimental information

| Property                             | Value                     | Source    |
|--------------------------------------|---------------------------|-----------|
| EM reconstruction method             | SINGLE PARTICLE           | Depositor |
| Imposed symmetry                     | POINT, C1                 | Depositor |
| Number of particles used             | 20312                     | Depositor |
| Resolution determination method      | FSC 0.5 CUT-OFF           | Depositor |
| CTF correction method                | PHASE FLIPPING ONLY       | Depositor |
| Microscope                           | FEI TITAN KRIOS           | Depositor |
| Voltage (kV)                         | 300                       | Depositor |
| Electron dose ( $e^-/\text{\AA}^2$ ) | 81                        | Depositor |
| Minimum defocus (nm)                 | 1500                      | Depositor |
| Maximum defocus (nm)                 | 3600                      | Depositor |
| Magnification                        | 130000                    | Depositor |
| Image detector                       | GATAN K2 SUMMIT (4k x 4k) | Depositor |
| Maximum map value                    | 0.046                     | Depositor |
| Minimum map value                    | -0.015                    | Depositor |
| Average map value                    | 0.000                     | Depositor |
| Map value standard deviation         | 0.002                     | Depositor |
| Recommended contour level            | 0.0155                    | Depositor |
| Map size ( $\text{\AA}$ )            | 282.48, 282.48, 282.48    | wwPDB     |
| Map dimensions                       | 264, 264, 264             | wwPDB     |
| Map angles ( $^\circ$ )              | 90.0, 90.0, 90.0          | wwPDB     |
| Pixel spacing ( $\text{\AA}$ )       | 1.07, 1.07, 1.07          | Depositor |

## 5 Model quality i

### 5.1 Standard geometry i

The Z score for a bond length (or angle) is the number of standard deviations the observed value is removed from the expected value. A bond length (or angle) with  $|Z| > 5$  is considered an outlier worth inspection. RMSZ is the root-mean-square of all Z scores of the bond lengths (or angles).

| Mol | Chain | Bond lengths |                  | Bond angles |                   |
|-----|-------|--------------|------------------|-------------|-------------------|
|     |       | RMSZ         | # Z  >5          | RMSZ        | # Z  >5           |
| 1   | A     | 1.68         | 70/4699 (1.5%)   | 2.61        | 607/6358 (9.5%)   |
| 2   | B     | 1.52         | 52/5047 (1.0%)   | 2.32        | 540/6841 (7.9%)   |
| 3   | M     | 1.59         | 61/3163 (1.9%)   | 1.85        | 139/4271 (3.3%)   |
| 4   | S     | 1.84         | 33/1377 (2.4%)   | 2.17        | 116/1872 (6.2%)   |
| All | All   | 1.62         | 216/14286 (1.5%) | 2.31        | 1402/19342 (7.2%) |

Chiral center outliers are detected by calculating the chiral volume of a chiral center and verifying if the center is modelled as a planar moiety or with the opposite hand. A planarity outlier is detected by checking planarity of atoms in a peptide group, atoms in a mainchain group or atoms of a sidechain that are expected to be planar.

| Mol | Chain | #Chirality outliers | #Planarity outliers |
|-----|-------|---------------------|---------------------|
| 1   | A     | 0                   | 49                  |
| 2   | B     | 0                   | 28                  |
| 3   | M     | 0                   | 14                  |
| 4   | S     | 0                   | 8                   |
| All | All   | 0                   | 99                  |

All (216) bond length outliers are listed below:

| Mol | Chain | Res | Type | Atoms | Z      | Observed(Å) | Ideal(Å) |
|-----|-------|-----|------|-------|--------|-------------|----------|
| 3   | M     | 132 | GLY  | CA-C  | -17.19 | 1.24        | 1.51     |
| 4   | S     | 53  | THR  | N-CA  | -14.56 | 1.17        | 1.46     |
| 3   | M     | 132 | GLY  | N-CA  | -14.40 | 1.24        | 1.46     |
| 1   | A     | 406 | GLY  | CA-C  | 13.34  | 1.73        | 1.51     |
| 3   | M     | 293 | PRO  | N-CD  | 12.51  | 1.65        | 1.47     |
| 4   | S     | 163 | THR  | CA-C  | 11.13  | 1.81        | 1.52     |
| 4   | S     | 46  | PHE  | CA-C  | -11.05 | 1.24        | 1.52     |
| 4   | S     | 55  | PRO  | N-CA  | 10.71  | 1.65        | 1.47     |
| 3   | M     | 56  | VAL  | CA-C  | -10.60 | 1.25        | 1.52     |
| 1   | A     | 218 | ALA  | CA-C  | -10.18 | 1.26        | 1.52     |
| 1   | A     | 139 | ASP  | N-CA  | -9.65  | 1.27        | 1.46     |
| 1   | A     | 407 | SER  | N-CA  | 9.46   | 1.65        | 1.46     |

*Continued on next page...*

*Continued from previous page...*

| Mol | Chain | Res | Type | Atoms | Z     | Observed(Å) | Ideal(Å) |
|-----|-------|-----|------|-------|-------|-------------|----------|
| 4   | S     | 51  | LEU  | N-CA  | -9.35 | 1.27        | 1.46     |
| 1   | A     | 175 | PRO  | N-CD  | 9.26  | 1.60        | 1.47     |
| 3   | M     | 41  | LEU  | CA-C  | -9.12 | 1.29        | 1.52     |
| 2   | B     | 337 | THR  | N-CA  | -9.11 | 1.28        | 1.46     |
| 3   | M     | 295 | GLY  | CA-C  | 9.02  | 1.66        | 1.51     |
| 4   | S     | 54  | PRO  | N-CA  | 8.98  | 1.62        | 1.47     |
| 4   | S     | 144 | THR  | N-CA  | -8.82 | 1.28        | 1.46     |
| 3   | M     | 231 | SER  | N-CA  | 8.77  | 1.63        | 1.46     |
| 4   | S     | 4   | ALA  | CA-CB | 8.56  | 1.70        | 1.52     |
| 1   | A     | 467 | LYS  | N-CA  | -8.49 | 1.29        | 1.46     |
| 2   | B     | 289 | PRO  | CA-C  | -8.40 | 1.36        | 1.52     |
| 1   | A     | 394 | GLN  | CA-C  | -8.30 | 1.31        | 1.52     |
| 1   | A     | 405 | THR  | CA-C  | -8.16 | 1.31        | 1.52     |
| 3   | M     | 225 | VAL  | CA-C  | -8.04 | 1.32        | 1.52     |
| 3   | M     | 335 | SER  | CA-C  | -8.04 | 1.32        | 1.52     |
| 2   | B     | 212 | VAL  | C-O   | 8.02  | 1.38        | 1.23     |
| 4   | S     | 83  | LEU  | CA-C  | 7.92  | 1.73        | 1.52     |
| 3   | M     | 354 | ASP  | CA-C  | 7.83  | 1.73        | 1.52     |
| 4   | S     | 140 | MET  | N-CA  | -7.76 | 1.30        | 1.46     |
| 1   | A     | 87  | CYS  | N-CA  | -7.71 | 1.30        | 1.46     |
| 3   | M     | 294 | ASP  | N-CA  | -7.71 | 1.30        | 1.46     |
| 3   | M     | 283 | PHE  | N-CA  | -7.54 | 1.31        | 1.46     |
| 4   | S     | 55  | PRO  | CA-C  | -7.50 | 1.37        | 1.52     |
| 3   | M     | 45  | SER  | CA-C  | 7.49  | 1.72        | 1.52     |
| 1   | A     | 406 | GLY  | C-N   | 7.45  | 1.51        | 1.34     |
| 1   | A     | 217 | ALA  | C-N   | 7.39  | 1.51        | 1.34     |
| 3   | M     | 239 | SER  | N-CA  | -7.35 | 1.31        | 1.46     |
| 3   | M     | 109 | LEU  | N-CA  | -7.32 | 1.31        | 1.46     |
| 3   | M     | 44  | ASP  | C-N   | 7.23  | 1.50        | 1.34     |
| 4   | S     | 167 | ILE  | C-N   | 7.19  | 1.46        | 1.33     |
| 3   | M     | 293 | PRO  | CA-C  | -7.19 | 1.38        | 1.52     |
| 3   | M     | 441 | GLY  | CA-C  | -7.16 | 1.40        | 1.51     |
| 3   | M     | 95  | THR  | N-CA  | 7.10  | 1.60        | 1.46     |
| 1   | A     | 529 | GLY  | N-CA  | -7.03 | 1.35        | 1.46     |
| 2   | B     | 330 | SER  | N-CA  | -6.99 | 1.32        | 1.46     |
| 2   | B     | 330 | SER  | C-N   | -6.96 | 1.21        | 1.34     |
| 1   | A     | 243 | ILE  | N-CA  | -6.96 | 1.32        | 1.46     |
| 1   | A     | 301 | GLY  | CA-C  | -6.95 | 1.40        | 1.51     |
| 2   | B     | 329 | ALA  | CA-C  | -6.86 | 1.35        | 1.52     |
| 3   | M     | 441 | GLY  | N-CA  | -6.81 | 1.35        | 1.46     |
| 1   | A     | 218 | ALA  | CA-CB | -6.77 | 1.38        | 1.52     |
| 1   | A     | 230 | PRO  | N-CD  | -6.74 | 1.38        | 1.47     |

*Continued on next page...*

*Continued from previous page...*

| Mol | Chain | Res | Type | Atoms  | Z     | Observed(Å) | Ideal(Å) |
|-----|-------|-----|------|--------|-------|-------------|----------|
| 3   | M     | 55  | MET  | N-CA   | -6.73 | 1.32        | 1.46     |
| 3   | M     | 420 | THR  | N-CA   | -6.69 | 1.32        | 1.46     |
| 3   | M     | 55  | MET  | C-N    | 6.68  | 1.49        | 1.34     |
| 1   | A     | 465 | SER  | N-CA   | -6.67 | 1.33        | 1.46     |
| 3   | M     | 230 | LYS  | CA-C   | 6.67  | 1.70        | 1.52     |
| 1   | A     | 509 | PRO  | N-CD   | 6.65  | 1.57        | 1.47     |
| 3   | M     | 322 | LEU  | C-O    | 6.61  | 1.35        | 1.23     |
| 3   | M     | 392 | MET  | N-CA   | -6.59 | 1.33        | 1.46     |
| 4   | S     | 55  | PRO  | N-CD   | 6.53  | 1.56        | 1.47     |
| 4   | S     | 108 | SER  | N-CA   | -6.50 | 1.33        | 1.46     |
| 3   | M     | 212 | ASN  | N-CA   | -6.48 | 1.33        | 1.46     |
| 4   | S     | 143 | GLU  | CA-C   | -6.48 | 1.36        | 1.52     |
| 1   | A     | 533 | ILE  | N-CA   | -6.46 | 1.33        | 1.46     |
| 4   | S     | 138 | GLY  | C-N    | 6.46  | 1.44        | 1.33     |
| 4   | S     | 103 | GLN  | CA-C   | -6.43 | 1.36        | 1.52     |
| 3   | M     | 336 | ASP  | N-CA   | -6.34 | 1.33        | 1.46     |
| 1   | A     | 298 | ILE  | C-O    | 6.30  | 1.35        | 1.23     |
| 4   | S     | 3   | HIS  | N-CA   | -6.26 | 1.33        | 1.46     |
| 2   | B     | 458 | MET  | C-O    | 6.25  | 1.35        | 1.23     |
| 2   | B     | 329 | ALA  | N-CA   | -6.23 | 1.33        | 1.46     |
| 1   | A     | 410 | TYR  | N-CA   | -6.21 | 1.33        | 1.46     |
| 4   | S     | 81  | ALA  | CA-CB  | -6.21 | 1.39        | 1.52     |
| 1   | A     | 71  | VAL  | CA-C   | -6.20 | 1.36        | 1.52     |
| 4   | S     | 124 | ASN  | N-CA   | -6.18 | 1.33        | 1.46     |
| 2   | B     | 568 | VAL  | N-CA   | -6.18 | 1.33        | 1.46     |
| 1   | A     | 221 | VAL  | N-CA   | 6.16  | 1.58        | 1.46     |
| 1   | A     | 566 | PHE  | CA-C   | -6.15 | 1.36        | 1.52     |
| 1   | A     | 394 | GLN  | N-CA   | -6.14 | 1.34        | 1.46     |
| 2   | B     | 585 | GLY  | N-CA   | -6.11 | 1.36        | 1.46     |
| 1   | A     | 278 | ILE  | N-CA   | -6.10 | 1.34        | 1.46     |
| 1   | A     | 464 | ILE  | CA-C   | -6.10 | 1.37        | 1.52     |
| 2   | B     | 172 | GLU  | CD-OE2 | -6.02 | 1.19        | 1.25     |
| 3   | M     | 56  | VAL  | C-N    | -6.00 | 1.22        | 1.33     |
| 2   | B     | 522 | GLU  | CA-C   | -5.98 | 1.37        | 1.52     |
| 3   | M     | 91  | THR  | CA-C   | -5.95 | 1.37        | 1.52     |
| 1   | A     | 418 | ILE  | C-N    | 5.93  | 1.47        | 1.34     |
| 1   | A     | 281 | LEU  | N-CA   | 5.92  | 1.58        | 1.46     |
| 1   | A     | 444 | VAL  | N-CA   | -5.92 | 1.34        | 1.46     |
| 1   | A     | 466 | ASP  | C-N    | -5.91 | 1.20        | 1.34     |
| 1   | A     | 534 | LYS  | CA-C   | -5.91 | 1.37        | 1.52     |
| 1   | A     | 277 | LYS  | C-N    | -5.91 | 1.20        | 1.34     |
| 3   | M     | 97  | ASP  | CA-C   | -5.90 | 1.37        | 1.52     |

*Continued on next page...*

*Continued from previous page...*

| Mol | Chain | Res | Type | Atoms  | Z     | Observed(Å) | Ideal(Å) |
|-----|-------|-----|------|--------|-------|-------------|----------|
| 3   | M     | 252 | ASP  | C-N    | -5.90 | 1.20        | 1.34     |
| 3   | M     | 257 | ALA  | N-CA   | -5.90 | 1.34        | 1.46     |
| 3   | M     | 262 | THR  | CA-C   | -5.90 | 1.37        | 1.52     |
| 4   | S     | 14  | PRO  | C-N    | -5.87 | 1.20        | 1.34     |
| 3   | M     | 446 | GLY  | CA-C   | 5.86  | 1.61        | 1.51     |
| 3   | M     | 25  | PRO  | CA-C   | -5.85 | 1.41        | 1.52     |
| 1   | A     | 84  | MET  | N-CA   | -5.84 | 1.34        | 1.46     |
| 3   | M     | 263 | MET  | N-CA   | -5.78 | 1.34        | 1.46     |
| 3   | M     | 456 | SER  | C-N    | 5.78  | 1.43        | 1.33     |
| 1   | A     | 302 | ASN  | CA-C   | -5.77 | 1.38        | 1.52     |
| 3   | M     | 83  | SER  | N-CA   | -5.76 | 1.34        | 1.46     |
| 2   | B     | 573 | GLU  | CD-OE2 | -5.75 | 1.19        | 1.25     |
| 4   | S     | 139 | GLY  | CA-C   | -5.75 | 1.42        | 1.51     |
| 2   | B     | 150 | LEU  | N-CA   | -5.75 | 1.34        | 1.46     |
| 2   | B     | 567 | GLN  | CA-C   | -5.75 | 1.38        | 1.52     |
| 1   | A     | 588 | LEU  | C-N    | -5.73 | 1.20        | 1.34     |
| 2   | B     | 576 | GLN  | C-N    | -5.73 | 1.20        | 1.34     |
| 1   | A     | 303 | MET  | N-CA   | -5.72 | 1.34        | 1.46     |
| 1   | A     | 241 | TYR  | N-CA   | -5.71 | 1.34        | 1.46     |
| 1   | A     | 508 | LEU  | N-CA   | -5.70 | 1.34        | 1.46     |
| 4   | S     | 95  | GLU  | CD-OE2 | -5.70 | 1.19        | 1.25     |
| 2   | B     | 290 | SER  | N-CA   | -5.69 | 1.34        | 1.46     |
| 2   | B     | 187 | ASP  | CA-C   | -5.68 | 1.38        | 1.52     |
| 1   | A     | 406 | GLY  | N-CA   | -5.68 | 1.37        | 1.46     |
| 2   | B     | 579 | PRO  | N-CD   | -5.67 | 1.40        | 1.47     |
| 2   | B     | 222 | HIS  | N-CA   | 5.65  | 1.57        | 1.46     |
| 3   | M     | 96  | ILE  | C-N    | 5.61  | 1.47        | 1.34     |
| 3   | M     | 113 | LYS  | CA-C   | -5.61 | 1.38        | 1.52     |
| 1   | A     | 387 | ILE  | CA-C   | -5.61 | 1.38        | 1.52     |
| 2   | B     | 501 | THR  | N-CA   | -5.60 | 1.35        | 1.46     |
| 1   | A     | 531 | ASP  | CA-C   | -5.60 | 1.38        | 1.52     |
| 1   | A     | 348 | PHE  | CA-C   | -5.58 | 1.38        | 1.52     |
| 2   | B     | 82  | TYR  | N-CA   | -5.58 | 1.35        | 1.46     |
| 4   | S     | 83  | LEU  | C-N    | -5.58 | 1.21        | 1.34     |
| 1   | A     | 405 | THR  | C-N    | -5.57 | 1.23        | 1.33     |
| 2   | B     | 526 | CYS  | N-CA   | -5.57 | 1.35        | 1.46     |
| 4   | S     | 158 | LYS  | CA-C   | -5.55 | 1.38        | 1.52     |
| 3   | M     | 296 | LYS  | CA-C   | -5.54 | 1.38        | 1.52     |
| 2   | B     | 219 | TYR  | C-N    | -5.52 | 1.21        | 1.34     |
| 2   | B     | 485 | LYS  | CA-C   | -5.51 | 1.38        | 1.52     |
| 4   | S     | 99  | LEU  | CA-C   | -5.51 | 1.38        | 1.52     |
| 1   | A     | 263 | LEU  | N-CA   | -5.51 | 1.35        | 1.46     |

*Continued on next page...*

*Continued from previous page...*

| Mol | Chain | Res | Type | Atoms  | Z     | Observed(Å) | Ideal(Å) |
|-----|-------|-----|------|--------|-------|-------------|----------|
| 3   | M     | 323 | MET  | N-CA   | -5.50 | 1.35        | 1.46     |
| 4   | S     | 80  | TYR  | N-CA   | -5.50 | 1.35        | 1.46     |
| 4   | S     | 83  | LEU  | N-CA   | -5.50 | 1.35        | 1.46     |
| 2   | B     | 584 | SER  | C-N    | -5.49 | 1.23        | 1.33     |
| 4   | S     | 84  | TYR  | C-N    | -5.48 | 1.21        | 1.34     |
| 3   | M     | 367 | ALA  | CA-CB  | -5.47 | 1.41        | 1.52     |
| 3   | M     | 25  | PRO  | N-CA   | -5.44 | 1.38        | 1.47     |
| 4   | S     | 144 | THR  | C-N    | -5.43 | 1.21        | 1.34     |
| 1   | A     | 373 | GLU  | CD-OE2 | -5.42 | 1.19        | 1.25     |
| 3   | M     | 284 | SER  | C-N    | -5.42 | 1.24        | 1.34     |
| 3   | M     | 457 | GLY  | CA-C   | -5.40 | 1.43        | 1.51     |
| 2   | B     | 574 | ASN  | N-CA   | -5.39 | 1.35        | 1.46     |
| 2   | B     | 601 | TYR  | N-CA   | -5.39 | 1.35        | 1.46     |
| 3   | M     | 354 | ASP  | C-N    | -5.39 | 1.21        | 1.34     |
| 1   | A     | 308 | ASP  | N-CA   | -5.39 | 1.35        | 1.46     |
| 2   | B     | 382 | TYR  | N-CA   | -5.38 | 1.35        | 1.46     |
| 1   | A     | 216 | SER  | C-N    | 5.38  | 1.46        | 1.34     |
| 1   | A     | 83  | ASP  | CA-C   | -5.37 | 1.39        | 1.52     |
| 4   | S     | 143 | GLU  | C-N    | -5.36 | 1.21        | 1.34     |
| 3   | M     | 262 | THR  | N-CA   | -5.34 | 1.35        | 1.46     |
| 1   | A     | 224 | GLU  | CD-OE2 | -5.33 | 1.19        | 1.25     |
| 1   | A     | 392 | MET  | N-CA   | -5.33 | 1.35        | 1.46     |
| 2   | B     | 83  | PHE  | C-N    | 5.33  | 1.46        | 1.34     |
| 1   | A     | 623 | MET  | CA-C   | -5.33 | 1.39        | 1.52     |
| 3   | M     | 223 | HIS  | C-N    | -5.33 | 1.21        | 1.34     |
| 1   | A     | 404 | GLN  | N-CA   | -5.33 | 1.35        | 1.46     |
| 2   | B     | 290 | SER  | CA-C   | -5.32 | 1.39        | 1.52     |
| 2   | B     | 383 | VAL  | CA-C   | -5.32 | 1.39        | 1.52     |
| 1   | A     | 192 | TYR  | CA-C   | -5.32 | 1.39        | 1.52     |
| 1   | A     | 535 | ILE  | N-CA   | -5.30 | 1.35        | 1.46     |
| 2   | B     | 190 | GLU  | CD-OE1 | -5.30 | 1.19        | 1.25     |
| 2   | B     | 500 | GLN  | C-N    | -5.30 | 1.21        | 1.34     |
| 1   | A     | 138 | ASN  | C-N    | -5.29 | 1.21        | 1.34     |
| 2   | B     | 331 | PRO  | N-CA   | -5.28 | 1.38        | 1.47     |
| 2   | B     | 425 | PRO  | CA-C   | -5.28 | 1.42        | 1.52     |
| 1   | A     | 464 | ILE  | C-N    | -5.27 | 1.22        | 1.34     |
| 2   | B     | 75  | ASP  | C-N    | -5.27 | 1.22        | 1.34     |
| 2   | B     | 219 | TYR  | CA-C   | -5.26 | 1.39        | 1.52     |
| 2   | B     | 407 | ASN  | N-CA   | -5.25 | 1.35        | 1.46     |
| 2   | B     | 443 | SER  | CA-C   | -5.25 | 1.39        | 1.52     |
| 2   | B     | 35  | TYR  | CA-C   | -5.25 | 1.39        | 1.52     |
| 2   | B     | 226 | LEU  | CA-C   | -5.24 | 1.39        | 1.52     |

*Continued on next page...*

*Continued from previous page...*

| Mol | Chain | Res | Type | Atoms  | Z     | Observed(Å) | Ideal(Å) |
|-----|-------|-----|------|--------|-------|-------------|----------|
| 2   | B     | 273 | SER  | N-CA   | -5.24 | 1.35        | 1.46     |
| 1   | A     | 388 | VAL  | CA-C   | -5.23 | 1.39        | 1.52     |
| 2   | B     | 133 | GLU  | CD-OE2 | -5.22 | 1.20        | 1.25     |
| 2   | B     | 384 | PHE  | N-CA   | -5.21 | 1.35        | 1.46     |
| 3   | M     | 444 | ALA  | CA-CB  | 5.21  | 1.63        | 1.52     |
| 2   | B     | 424 | PHE  | N-CA   | -5.21 | 1.35        | 1.46     |
| 2   | B     | 109 | ALA  | CA-CB  | -5.20 | 1.41        | 1.52     |
| 3   | M     | 256 | VAL  | C-O    | 5.20  | 1.33        | 1.23     |
| 4   | S     | 159 | ALA  | CA-CB  | 5.18  | 1.63        | 1.52     |
| 2   | B     | 190 | GLU  | CD-OE2 | -5.17 | 1.20        | 1.25     |
| 1   | A     | 120 | ILE  | CA-C   | -5.17 | 1.39        | 1.52     |
| 3   | M     | 253 | ASN  | N-CA   | -5.17 | 1.36        | 1.46     |
| 1   | A     | 445 | ASN  | CA-C   | -5.17 | 1.39        | 1.52     |
| 3   | M     | 374 | TYR  | N-CA   | -5.15 | 1.36        | 1.46     |
| 3   | M     | 365 | GLU  | N-CA   | -5.13 | 1.36        | 1.46     |
| 2   | B     | 573 | GLU  | CD-OE1 | -5.13 | 1.20        | 1.25     |
| 3   | M     | 476 | THR  | C-N    | -5.13 | 1.23        | 1.33     |
| 1   | A     | 399 | ASP  | N-CA   | -5.12 | 1.36        | 1.46     |
| 1   | A     | 507 | GLN  | C-N    | -5.11 | 1.22        | 1.34     |
| 4   | S     | 29  | LYS  | CA-C   | -5.11 | 1.39        | 1.52     |
| 3   | M     | 41  | LEU  | C-N    | 5.10  | 1.45        | 1.34     |
| 1   | A     | 224 | GLU  | CD-OE1 | -5.10 | 1.20        | 1.25     |
| 3   | M     | 228 | LYS  | C-N    | -5.10 | 1.22        | 1.34     |
| 2   | B     | 289 | PRO  | C-N    | -5.10 | 1.22        | 1.34     |
| 3   | M     | 238 | GLY  | CA-C   | -5.10 | 1.43        | 1.51     |
| 2   | B     | 500 | GLN  | CA-C   | -5.09 | 1.39        | 1.52     |
| 3   | M     | 373 | ALA  | C-N    | -5.08 | 1.22        | 1.34     |
| 2   | B     | 515 | PHE  | CA-C   | 5.06  | 1.66        | 1.52     |
| 3   | M     | 227 | GLU  | CD-OE2 | -5.06 | 1.20        | 1.25     |
| 1   | A     | 85  | ALA  | CA-CB  | -5.05 | 1.41        | 1.52     |
| 1   | A     | 302 | ASN  | N-CA   | -5.05 | 1.36        | 1.46     |
| 1   | A     | 514 | GLU  | CD-OE1 | -5.05 | 1.20        | 1.25     |
| 1   | A     | 466 | ASP  | CA-C   | -5.04 | 1.39        | 1.52     |
| 1   | A     | 304 | LEU  | N-CA   | -5.04 | 1.36        | 1.46     |
| 1   | A     | 522 | PHE  | CA-C   | -5.02 | 1.39        | 1.52     |
| 1   | A     | 242 | GLU  | C-O    | -5.02 | 1.13        | 1.23     |

All (1402) bond angle outliers are listed below:

| Mol | Chain | Res | Type | Atoms  | Z      | Observed(°) | Ideal(°) |
|-----|-------|-----|------|--------|--------|-------------|----------|
| 1   | A     | 242 | GLU  | C-N-CA | 22.76  | 178.60      | 121.70   |
| 1   | A     | 265 | GLN  | N-CA-C | -19.23 | 59.09       | 111.00   |

*Continued on next page...*

*Continued from previous page...*

| Mol | Chain | Res | Type | Atoms   | Z      | Observed(°) | Ideal(°) |
|-----|-------|-----|------|---------|--------|-------------|----------|
| 1   | A     | 80  | TYR  | N-CA-C  | -18.37 | 61.39       | 111.00   |
| 3   | M     | 45  | SER  | C-N-CA  | -17.46 | 78.06       | 121.70   |
| 1   | A     | 277 | LYS  | C-N-CA  | 17.23  | 164.78      | 121.70   |
| 3   | M     | 354 | ASP  | N-CA-C  | -16.54 | 66.34       | 111.00   |
| 3   | M     | 354 | ASP  | C-N-CA  | 16.54  | 163.04      | 121.70   |
| 1   | A     | 444 | VAL  | N-CA-C  | -16.42 | 66.65       | 111.00   |
| 3   | M     | 373 | ALA  | CB-CA-C | 15.46  | 133.29      | 110.10   |
| 1   | A     | 98  | ASN  | C-N-CA  | 15.35  | 160.08      | 121.70   |
| 2   | B     | 584 | SER  | N-CA-C  | 15.03  | 151.59      | 111.00   |
| 1   | A     | 304 | LEU  | C-N-CA  | -14.99 | 84.22       | 121.70   |
| 2   | B     | 263 | PRO  | C-N-CA  | 14.60  | 158.20      | 121.70   |
| 1   | A     | 534 | LYS  | CA-C-N  | 14.58  | 149.28      | 117.20   |
| 2   | B     | 290 | SER  | C-N-CA  | -14.53 | 85.37       | 121.70   |
| 1   | A     | 534 | LYS  | C-N-CA  | 14.19  | 157.16      | 121.70   |
| 3   | M     | 294 | ASP  | N-CA-C  | -13.94 | 73.35       | 111.00   |
| 2   | B     | 600 | LYS  | C-N-CA  | -13.51 | 87.92       | 121.70   |
| 1   | A     | 532 | LEU  | C-N-CA  | -13.43 | 88.14       | 121.70   |
| 1   | A     | 80  | TYR  | O-C-N   | -13.25 | 100.68      | 123.20   |
| 1   | A     | 418 | ILE  | C-N-CA  | -13.24 | 88.60       | 121.70   |
| 2   | B     | 78  | ASP  | C-N-CA  | -13.24 | 88.60       | 121.70   |
| 3   | M     | 293 | PRO  | CA-N-CD | -12.75 | 93.65       | 111.50   |
| 1   | A     | 98  | ASN  | N-CA-C  | -12.73 | 76.62       | 111.00   |
| 1   | A     | 464 | ILE  | C-N-CA  | -12.72 | 89.90       | 121.70   |
| 4   | S     | 168 | GLY  | N-CA-C  | 12.69  | 144.83      | 113.10   |
| 1   | A     | 64  | LEU  | O-C-N   | -12.60 | 102.54      | 122.70   |
| 1   | A     | 302 | ASN  | N-CA-C  | -12.60 | 76.99       | 111.00   |
| 1   | A     | 260 | PHE  | O-C-N   | -12.55 | 102.61      | 122.70   |
| 1   | A     | 405 | THR  | C-N-CA  | -12.50 | 96.04       | 122.30   |
| 1   | A     | 536 | MET  | O-C-N   | -12.30 | 103.02      | 122.70   |
| 1   | A     | 151 | SER  | C-N-CA  | -12.26 | 91.06       | 121.70   |
| 3   | M     | 54  | SER  | N-CA-C  | 12.18  | 143.88      | 111.00   |
| 1   | A     | 469 | LEU  | C-N-CA  | -12.12 | 96.86       | 122.30   |
| 1   | A     | 135 | ASP  | C-N-CA  | -11.93 | 97.25       | 122.30   |
| 2   | B     | 330 | SER  | N-CA-C  | -11.78 | 79.19       | 111.00   |
| 1   | A     | 233 | PHE  | C-N-CA  | -11.76 | 92.31       | 121.70   |
| 1   | A     | 323 | CYS  | C-N-CA  | 11.63  | 150.78      | 121.70   |
| 1   | A     | 136 | GLY  | C-N-CA  | -11.47 | 93.02       | 121.70   |
| 1   | A     | 265 | GLN  | CA-C-N  | 11.46  | 142.42      | 117.20   |
| 1   | A     | 536 | MET  | C-N-CA  | -11.42 | 93.16       | 121.70   |
| 4   | S     | 53  | THR  | C-N-CD  | 11.41  | 152.36      | 128.40   |
| 3   | M     | 458 | LEU  | O-C-N   | 11.37  | 140.89      | 122.70   |
| 2   | B     | 329 | ALA  | CB-CA-C | -11.32 | 93.12       | 110.10   |

*Continued on next page...*



*Continued from previous page...*

| Mol | Chain | Res | Type | Atoms   | Z      | Observed(°) | Ideal(°) |
|-----|-------|-----|------|---------|--------|-------------|----------|
| 2   | B     | 404 | ASN  | C-N-CA  | -11.29 | 93.48       | 121.70   |
| 3   | M     | 462 | LYS  | N-CA-C  | -11.24 | 80.64       | 111.00   |
| 1   | A     | 465 | SER  | CA-C-N  | -11.18 | 92.60       | 117.20   |
| 1   | A     | 242 | GLU  | CA-C-N  | 11.16  | 141.76      | 117.20   |
| 1   | A     | 534 | LYS  | N-CA-C  | -11.16 | 80.85       | 111.00   |
| 3   | M     | 46  | SER  | C-N-CA  | -10.93 | 94.37       | 121.70   |
| 2   | B     | 310 | ILE  | C-N-CA  | -10.93 | 94.38       | 121.70   |
| 4   | S     | 109 | LEU  | O-C-N   | -10.91 | 105.24      | 122.70   |
| 1   | A     | 416 | ILE  | C-N-CD  | 10.83  | 151.15      | 128.40   |
| 4   | S     | 43  | ASN  | O-C-N   | -10.74 | 105.51      | 122.70   |
| 2   | B     | 497 | LEU  | O-C-N   | -10.67 | 105.62      | 122.70   |
| 1   | A     | 80  | TYR  | CA-C-N  | 10.67  | 137.54      | 116.20   |
| 4   | S     | 163 | THR  | C-N-CA  | 10.67  | 148.37      | 121.70   |
| 4   | S     | 54  | PRO  | CA-N-CD | -10.63 | 96.61       | 111.50   |
| 1   | A     | 204 | VAL  | O-C-N   | -10.58 | 105.78      | 122.70   |
| 1   | A     | 586 | GLU  | C-N-CA  | -10.53 | 95.37       | 121.70   |
| 2   | B     | 82  | TYR  | C-N-CA  | -10.53 | 95.37       | 121.70   |
| 1   | A     | 244 | LEU  | O-C-N   | -10.47 | 105.95      | 122.70   |
| 2   | B     | 584 | SER  | C-N-CA  | -10.44 | 100.38      | 122.30   |
| 1   | A     | 629 | LEU  | C-N-CD  | 10.32  | 150.08      | 128.40   |
| 1   | A     | 84  | MET  | C-N-CA  | -10.31 | 95.92       | 121.70   |
| 4   | S     | 164 | ASP  | C-N-CA  | -10.30 | 95.94       | 121.70   |
| 1   | A     | 519 | LEU  | C-N-CA  | -10.28 | 100.72      | 122.30   |
| 1   | A     | 621 | LEU  | C-N-CD  | 10.16  | 149.74      | 128.40   |
| 2   | B     | 571 | SER  | N-CA-C  | -10.09 | 83.77       | 111.00   |
| 1   | A     | 569 | ASP  | C-N-CA  | -10.04 | 96.61       | 121.70   |
| 3   | M     | 83  | SER  | C-N-CA  | 10.02  | 146.75      | 121.70   |
| 2   | B     | 289 | PRO  | C-N-CA  | -9.94  | 96.84       | 121.70   |
| 2   | B     | 162 | VAL  | C-N-CA  | -9.91  | 96.93       | 121.70   |
| 1   | A     | 84  | MET  | O-C-N   | -9.90  | 106.86      | 122.70   |
| 1   | A     | 320 | HIS  | O-C-N   | -9.90  | 106.86      | 122.70   |
| 1   | A     | 380 | ASP  | N-CA-C  | -9.90  | 84.27       | 111.00   |
| 2   | B     | 230 | PHE  | C-N-CA  | -9.86  | 97.05       | 121.70   |
| 2   | B     | 570 | GLY  | N-CA-C  | -9.73  | 88.77       | 113.10   |
| 1   | A     | 346 | THR  | C-N-CA  | -9.72  | 97.39       | 121.70   |
| 1   | A     | 586 | GLU  | O-C-N   | -9.70  | 107.18      | 122.70   |
| 2   | B     | 576 | GLN  | N-CA-C  | -9.66  | 84.92       | 111.00   |
| 3   | M     | 268 | GLY  | C-N-CA  | -9.63  | 97.62       | 121.70   |
| 1   | A     | 504 | ILE  | O-C-N   | -9.63  | 107.30      | 122.70   |
| 3   | M     | 57  | GLY  | C-N-CA  | 9.58   | 145.66      | 121.70   |
| 2   | B     | 577 | ASN  | C-N-CD  | 9.56   | 148.48      | 128.40   |
| 1   | A     | 462 | GLN  | O-C-N   | -9.55  | 107.41      | 122.70   |

*Continued on next page...*

*Continued from previous page...*

| Mol | Chain | Res | Type | Atoms   | Z     | Observed(°) | Ideal(°) |
|-----|-------|-----|------|---------|-------|-------------|----------|
| 1   | A     | 319 | LEU  | O-C-N   | -9.53 | 107.45      | 122.70   |
| 2   | B     | 212 | VAL  | CA-C-O  | 9.50  | 140.05      | 120.10   |
| 2   | B     | 584 | SER  | N-CA-CB | -9.47 | 96.30       | 110.50   |
| 1   | A     | 212 | ILE  | C-N-CA  | -9.45 | 98.06       | 121.70   |
| 1   | A     | 305 | GLU  | N-CA-C  | 9.45  | 136.51      | 111.00   |
| 1   | A     | 242 | GLU  | N-CA-C  | -9.43 | 85.53       | 111.00   |
| 2   | B     | 102 | HIS  | O-C-N   | -9.39 | 107.68      | 122.70   |
| 1   | A     | 569 | ASP  | N-CA-C  | -9.37 | 85.69       | 111.00   |
| 2   | B     | 187 | ASP  | C-N-CA  | -9.37 | 98.27       | 121.70   |
| 1   | A     | 403 | LEU  | C-N-CA  | -9.36 | 98.30       | 121.70   |
| 3   | M     | 252 | ASP  | N-CA-C  | -9.34 | 85.78       | 111.00   |
| 2   | B     | 366 | LEU  | O-C-N   | -9.33 | 107.77      | 122.70   |
| 2   | B     | 577 | ASN  | N-CA-C  | 9.33  | 136.19      | 111.00   |
| 1   | A     | 282 | MET  | O-C-N   | -9.32 | 107.78      | 122.70   |
| 1   | A     | 381 | GLU  | C-N-CA  | -9.30 | 98.44       | 121.70   |
| 2   | B     | 535 | GLN  | C-N-CA  | -9.29 | 98.48       | 121.70   |
| 4   | S     | 143 | GLU  | N-CA-C  | -9.29 | 85.93       | 111.00   |
| 1   | A     | 80  | TYR  | C-N-CA  | 9.28  | 141.79      | 122.30   |
| 2   | B     | 560 | ILE  | C-N-CA  | -9.24 | 98.59       | 121.70   |
| 3   | M     | 306 | LEU  | O-C-N   | -9.24 | 107.91      | 122.70   |
| 2   | B     | 461 | HIS  | C-N-CA  | -9.23 | 98.62       | 121.70   |
| 2   | B     | 505 | ASP  | C-N-CA  | -9.19 | 98.72       | 121.70   |
| 1   | A     | 504 | ILE  | C-N-CA  | -9.18 | 98.76       | 121.70   |
| 1   | A     | 110 | ALA  | C-N-CA  | -9.16 | 98.79       | 121.70   |
| 2   | B     | 205 | PRO  | C-N-CA  | -9.13 | 98.89       | 121.70   |
| 1   | A     | 275 | LEU  | C-N-CD  | 9.12  | 147.55      | 128.40   |
| 1   | A     | 365 | VAL  | C-N-CA  | -9.11 | 98.92       | 121.70   |
| 1   | A     | 163 | ALA  | C-N-CA  | -9.08 | 99.00       | 121.70   |
| 1   | A     | 534 | LYS  | CA-C-O  | -9.07 | 101.04      | 120.10   |
| 3   | M     | 41  | LEU  | O-C-N   | 9.07  | 137.21      | 122.70   |
| 2   | B     | 211 | ALA  | O-C-N   | 9.05  | 137.18      | 122.70   |
| 1   | A     | 465 | SER  | C-N-CA  | 9.01  | 144.21      | 121.70   |
| 1   | A     | 103 | LYS  | O-C-N   | -8.99 | 108.31      | 122.70   |
| 3   | M     | 80  | THR  | N-CA-C  | 8.99  | 135.26      | 111.00   |
| 2   | B     | 568 | VAL  | CA-C-N  | -8.98 | 97.44       | 117.20   |
| 2   | B     | 497 | LEU  | C-N-CA  | -8.98 | 99.25       | 121.70   |
| 1   | A     | 539 | ASN  | O-C-N   | -8.88 | 108.49      | 122.70   |
| 1   | A     | 242 | GLU  | O-C-N   | -8.87 | 108.50      | 122.70   |
| 1   | A     | 86  | TRP  | C-N-CA  | -8.86 | 99.55       | 121.70   |
| 1   | A     | 100 | LEU  | C-N-CA  | -8.85 | 99.59       | 121.70   |
| 2   | B     | 569 | THR  | N-CA-C  | 8.83  | 134.84      | 111.00   |
| 3   | M     | 477 | GLY  | C-N-CA  | -8.83 | 99.62       | 121.70   |

*Continued on next page...*

*Continued from previous page...*

| Mol | Chain | Res | Type | Atoms   | Z     | Observed(°) | Ideal(°) |
|-----|-------|-----|------|---------|-------|-------------|----------|
| 1   | A     | 196 | LEU  | C-N-CA  | -8.82 | 99.64       | 121.70   |
| 1   | A     | 240 | LEU  | C-N-CA  | -8.82 | 99.64       | 121.70   |
| 1   | A     | 529 | GLY  | CA-C-O  | -8.81 | 104.74      | 120.60   |
| 1   | A     | 461 | CYS  | O-C-N   | -8.81 | 108.61      | 122.70   |
| 2   | B     | 559 | ASP  | CA-C-O  | -8.80 | 101.62      | 120.10   |
| 1   | A     | 350 | SER  | O-C-N   | -8.79 | 108.64      | 122.70   |
| 2   | B     | 212 | VAL  | O-C-N   | -8.78 | 108.65      | 122.70   |
| 2   | B     | 404 | ASN  | O-C-N   | -8.78 | 108.66      | 122.70   |
| 1   | A     | 545 | HIS  | C-N-CA  | -8.77 | 99.79       | 121.70   |
| 4   | S     | 104 | THR  | O-C-N   | 8.72  | 136.65      | 122.70   |
| 1   | A     | 88  | ASN  | C-N-CA  | -8.71 | 99.92       | 121.70   |
| 2   | B     | 557 | SER  | O-C-N   | -8.71 | 108.77      | 122.70   |
| 4   | S     | 167 | ILE  | C-N-CA  | -8.68 | 104.08      | 122.30   |
| 2   | B     | 523 | PHE  | O-C-N   | -8.62 | 108.91      | 122.70   |
| 1   | A     | 154 | ILE  | N-CA-C  | 8.61  | 134.25      | 111.00   |
| 4   | S     | 98  | ILE  | O-C-N   | 8.61  | 136.47      | 122.70   |
| 2   | B     | 109 | ALA  | C-N-CA  | -8.60 | 100.21      | 121.70   |
| 1   | A     | 325 | SER  | N-CA-C  | -8.56 | 87.87       | 111.00   |
| 2   | B     | 223 | LEU  | C-N-CA  | -8.53 | 100.39      | 121.70   |
| 3   | M     | 92  | PHE  | O-C-N   | 8.52  | 136.34      | 122.70   |
| 1   | A     | 413 | SER  | N-CA-C  | -8.52 | 88.01       | 111.00   |
| 3   | M     | 367 | ALA  | C-N-CA  | 8.51  | 142.97      | 121.70   |
| 4   | S     | 81  | ALA  | CB-CA-C | 8.51  | 122.86      | 110.10   |
| 4   | S     | 100 | ASP  | O-C-N   | 8.51  | 136.31      | 122.70   |
| 1   | A     | 233 | PHE  | O-C-N   | -8.49 | 109.11      | 122.70   |
| 3   | M     | 420 | THR  | C-N-CA  | -8.48 | 104.49      | 122.30   |
| 1   | A     | 367 | ILE  | O-C-N   | 8.47  | 136.25      | 122.70   |
| 2   | B     | 339 | PHE  | O-C-N   | 8.44  | 136.21      | 122.70   |
| 1   | A     | 461 | CYS  | CA-C-O  | 8.44  | 137.83      | 120.10   |
| 3   | M     | 292 | PRO  | C-N-CA  | 8.44  | 157.45      | 122.00   |
| 1   | A     | 432 | ILE  | O-C-N   | 8.43  | 136.19      | 122.70   |
| 1   | A     | 328 | PRO  | C-N-CA  | -8.43 | 100.64      | 121.70   |
| 1   | A     | 281 | LEU  | CA-C-O  | 8.42  | 137.79      | 120.10   |
| 1   | A     | 391 | LEU  | C-N-CA  | -8.42 | 100.66      | 121.70   |
| 1   | A     | 508 | LEU  | N-CA-C  | 8.42  | 133.72      | 111.00   |
| 2   | B     | 147 | MET  | O-C-N   | -8.41 | 109.24      | 122.70   |
| 2   | B     | 146 | LYS  | C-N-CA  | -8.41 | 100.67      | 121.70   |
| 1   | A     | 450 | TYR  | O-C-N   | 8.39  | 136.13      | 122.70   |
| 4   | S     | 103 | GLN  | O-C-N   | 8.38  | 136.10      | 122.70   |
| 2   | B     | 574 | ASN  | C-N-CA  | -8.36 | 100.79      | 121.70   |
| 1   | A     | 215 | VAL  | CA-C-O  | 8.36  | 137.65      | 120.10   |
| 2   | B     | 472 | VAL  | O-C-N   | -8.33 | 109.38      | 122.70   |

*Continued on next page...*

*Continued from previous page...*

| Mol | Chain | Res | Type | Atoms  | Z     | Observed(°) | Ideal(°) |
|-----|-------|-----|------|--------|-------|-------------|----------|
| 1   | A     | 120 | ILE  | O-C-N  | 8.32  | 136.02      | 122.70   |
| 4   | S     | 46  | PHE  | CA-C-O | -8.31 | 102.64      | 120.10   |
| 1   | A     | 424 | TYR  | O-C-N  | 8.31  | 135.99      | 122.70   |
| 1   | A     | 94  | VAL  | O-C-N  | -8.31 | 109.41      | 122.70   |
| 3   | M     | 457 | GLY  | N-CA-C | -8.31 | 92.33       | 113.10   |
| 4   | S     | 161 | GLU  | O-C-N  | -8.30 | 109.42      | 122.70   |
| 2   | B     | 108 | PHE  | O-C-N  | -8.30 | 109.42      | 122.70   |
| 1   | A     | 270 | LEU  | O-C-N  | 8.27  | 135.93      | 122.70   |
| 3   | M     | 68  | VAL  | N-CA-C | 8.27  | 133.34      | 111.00   |
| 3   | M     | 335 | SER  | O-C-N  | 8.27  | 135.94      | 122.70   |
| 2   | B     | 325 | LEU  | O-C-N  | -8.27 | 109.47      | 122.70   |
| 3   | M     | 97  | ASP  | O-C-N  | 8.27  | 135.92      | 122.70   |
| 2   | B     | 444 | THR  | O-C-N  | -8.26 | 109.48      | 122.70   |
| 2   | B     | 366 | LEU  | C-N-CA | -8.25 | 101.08      | 121.70   |
| 1   | A     | 275 | LEU  | C-N-CA | -8.24 | 87.37       | 122.00   |
| 1   | A     | 534 | LYS  | O-C-N  | -8.24 | 109.52      | 122.70   |
| 2   | B     | 56  | SER  | O-C-N  | -8.24 | 109.52      | 122.70   |
| 3   | M     | 54  | SER  | O-C-N  | 8.22  | 135.86      | 122.70   |
| 1   | A     | 573 | GLU  | O-C-N  | -8.22 | 109.55      | 122.70   |
| 2   | B     | 205 | PRO  | O-C-N  | -8.19 | 109.59      | 122.70   |
| 3   | M     | 330 | GLY  | C-N-CA | 8.19  | 142.17      | 121.70   |
| 1   | A     | 192 | TYR  | CA-C-O | -8.19 | 102.91      | 120.10   |
| 3   | M     | 91  | THR  | CA-C-O | -8.17 | 102.94      | 120.10   |
| 1   | A     | 631 | SER  | O-C-N  | 8.16  | 135.76      | 122.70   |
| 4   | S     | 158 | LYS  | O-C-N  | 8.16  | 135.76      | 122.70   |
| 1   | A     | 443 | SER  | N-CA-C | 8.15  | 133.01      | 111.00   |
| 2   | B     | 83  | PHE  | O-C-N  | 8.14  | 135.72      | 122.70   |
| 4   | S     | 46  | PHE  | N-CA-C | -8.13 | 89.05       | 111.00   |
| 1   | A     | 431 | VAL  | O-C-N  | 8.12  | 135.70      | 122.70   |
| 2   | B     | 105 | LEU  | O-C-N  | -8.12 | 109.71      | 122.70   |
| 2   | B     | 505 | ASP  | O-C-N  | -8.12 | 109.71      | 122.70   |
| 2   | B     | 132 | SER  | C-N-CA | -8.11 | 101.42      | 121.70   |
| 1   | A     | 415 | ARG  | N-CA-C | -8.11 | 89.10       | 111.00   |
| 1   | A     | 487 | MET  | O-C-N  | -8.11 | 109.72      | 122.70   |
| 1   | A     | 100 | LEU  | O-C-N  | -8.11 | 109.73      | 122.70   |
| 1   | A     | 637 | GLU  | C-N-CA | -8.10 | 101.44      | 121.70   |
| 1   | A     | 103 | LYS  | CA-C-O | 8.09  | 137.10      | 120.10   |
| 1   | A     | 434 | SER  | O-C-N  | 8.09  | 135.65      | 122.70   |
| 3   | M     | 74  | TYR  | CA-C-O | 8.08  | 137.07      | 120.10   |
| 2   | B     | 132 | SER  | O-C-N  | -8.08 | 109.77      | 122.70   |
| 4   | S     | 74  | GLN  | O-C-N  | -8.07 | 109.79      | 122.70   |
| 1   | A     | 138 | ASN  | N-CA-C | -8.05 | 89.26       | 111.00   |

*Continued on next page...*

*Continued from previous page...*

| Mol | Chain | Res | Type | Atoms   | Z     | Observed(°) | Ideal(°) |
|-----|-------|-----|------|---------|-------|-------------|----------|
| 2   | B     | 142 | LEU  | O-C-N   | -8.04 | 109.84      | 122.70   |
| 2   | B     | 115 | LEU  | O-C-N   | 8.02  | 135.53      | 122.70   |
| 2   | B     | 375 | LEU  | O-C-N   | -8.02 | 105.86      | 121.10   |
| 2   | B     | 515 | PHE  | C-N-CA  | -8.02 | 105.45      | 122.30   |
| 2   | B     | 296 | ASP  | CA-C-O  | -8.01 | 103.28      | 120.10   |
| 1   | A     | 547 | VAL  | O-C-N   | 8.01  | 135.51      | 122.70   |
| 2   | B     | 273 | SER  | N-CA-C  | 8.01  | 132.62      | 111.00   |
| 1   | A     | 220 | SER  | O-C-N   | 7.99  | 135.49      | 122.70   |
| 2   | B     | 240 | LEU  | N-CA-C  | 7.98  | 132.55      | 111.00   |
| 2   | B     | 35  | TYR  | O-C-N   | 7.97  | 135.46      | 122.70   |
| 3   | M     | 55  | MET  | CA-C-N  | 7.97  | 134.74      | 117.20   |
| 3   | M     | 294 | ASP  | C-N-CA  | 7.97  | 139.03      | 122.30   |
| 1   | A     | 264 | SER  | C-N-CA  | -7.96 | 101.79      | 121.70   |
| 2   | B     | 389 | ILE  | O-C-N   | -7.94 | 109.99      | 122.70   |
| 1   | A     | 545 | HIS  | O-C-N   | -7.94 | 110.00      | 122.70   |
| 2   | B     | 108 | PHE  | CA-C-O  | 7.94  | 136.77      | 120.10   |
| 2   | B     | 566 | ALA  | C-N-CA  | 7.94  | 141.54      | 121.70   |
| 3   | M     | 262 | THR  | C-N-CA  | -7.92 | 101.90      | 121.70   |
| 2   | B     | 299 | LEU  | O-C-N   | 7.91  | 135.36      | 122.70   |
| 1   | A     | 281 | LEU  | C-N-CA  | -7.91 | 101.93      | 121.70   |
| 2   | B     | 126 | SER  | O-C-N   | -7.91 | 110.05      | 122.70   |
| 3   | M     | 292 | PRO  | N-CA-C  | -7.90 | 91.57       | 112.10   |
| 1   | A     | 218 | ALA  | O-C-N   | 7.89  | 135.33      | 122.70   |
| 2   | B     | 508 | ARG  | O-C-N   | -7.89 | 110.08      | 122.70   |
| 2   | B     | 325 | LEU  | C-N-CA  | -7.88 | 101.99      | 121.70   |
| 1   | A     | 212 | ILE  | O-C-N   | -7.86 | 110.13      | 122.70   |
| 1   | A     | 281 | LEU  | O-C-N   | -7.86 | 110.13      | 122.70   |
| 1   | A     | 448 | GLU  | N-CA-C  | -7.84 | 89.82       | 111.00   |
| 2   | B     | 261 | PRO  | CA-N-CD | -7.84 | 100.52      | 111.50   |
| 1   | A     | 365 | VAL  | O-C-N   | -7.84 | 110.16      | 122.70   |
| 1   | A     | 158 | LEU  | O-C-N   | 7.84  | 135.24      | 122.70   |
| 4   | S     | 108 | SER  | O-C-N   | 7.84  | 135.24      | 122.70   |
| 2   | B     | 153 | ILE  | O-C-N   | 7.83  | 135.23      | 122.70   |
| 3   | M     | 72  | LEU  | C-N-CA  | 7.82  | 141.24      | 121.70   |
| 2   | B     | 317 | VAL  | O-C-N   | 7.80  | 135.18      | 122.70   |
| 1   | A     | 70  | ALA  | O-C-N   | 7.80  | 135.18      | 122.70   |
| 2   | B     | 172 | GLU  | O-C-N   | -7.80 | 110.22      | 122.70   |
| 3   | M     | 263 | MET  | C-N-CA  | 7.80  | 138.68      | 122.30   |
| 1   | A     | 298 | ILE  | O-C-N   | -7.78 | 110.25      | 122.70   |
| 4   | S     | 132 | LEU  | O-C-N   | 7.77  | 135.13      | 122.70   |
| 2   | B     | 418 | TYR  | C-N-CA  | -7.76 | 102.29      | 121.70   |
| 2   | B     | 528 | ASP  | O-C-N   | 7.76  | 135.12      | 122.70   |

*Continued on next page...*

*Continued from previous page...*

| Mol | Chain | Res | Type | Atoms   | Z     | Observed(°) | Ideal(°) |
|-----|-------|-----|------|---------|-------|-------------|----------|
| 1   | A     | 588 | LEU  | O-C-N   | -7.75 | 110.29      | 122.70   |
| 1   | A     | 218 | ALA  | CB-CA-C | 7.75  | 121.72      | 110.10   |
| 2   | B     | 147 | MET  | C-N-CA  | -7.74 | 102.34      | 121.70   |
| 3   | M     | 237 | THR  | C-N-CA  | -7.74 | 106.05      | 122.30   |
| 1   | A     | 328 | PRO  | O-C-N   | -7.71 | 110.36      | 122.70   |
| 1   | A     | 330 | LEU  | O-C-N   | 7.71  | 135.04      | 122.70   |
| 1   | A     | 394 | GLN  | CA-C-O  | -7.71 | 103.92      | 120.10   |
| 4   | S     | 109 | LEU  | CA-C-O  | 7.70  | 136.28      | 120.10   |
| 2   | B     | 478 | LEU  | O-C-N   | -7.70 | 110.39      | 122.70   |
| 3   | M     | 132 | GLY  | CA-C-O  | 7.69  | 134.45      | 120.60   |
| 1   | A     | 461 | CYS  | C-N-CA  | -7.69 | 102.47      | 121.70   |
| 2   | B     | 584 | SER  | O-C-N   | -7.68 | 110.14      | 123.20   |
| 1   | A     | 304 | LEU  | O-C-N   | -7.68 | 110.42      | 122.70   |
| 2   | B     | 174 | ALA  | O-C-N   | -7.68 | 110.42      | 122.70   |
| 1   | A     | 346 | THR  | O-C-N   | -7.67 | 110.43      | 122.70   |
| 2   | B     | 560 | ILE  | O-C-N   | -7.66 | 110.44      | 122.70   |
| 1   | A     | 527 | GLU  | C-N-CA  | 7.66  | 140.84      | 121.70   |
| 2   | B     | 237 | ILE  | O-C-N   | -7.65 | 110.46      | 122.70   |
| 1   | A     | 559 | PHE  | O-C-N   | 7.65  | 134.93      | 122.70   |
| 4   | S     | 36  | TYR  | O-C-N   | 7.64  | 134.93      | 122.70   |
| 3   | M     | 232 | HIS  | CA-C-O  | 7.64  | 136.15      | 120.10   |
| 1   | A     | 156 | PRO  | O-C-N   | -7.63 | 110.49      | 122.70   |
| 2   | B     | 220 | ALA  | N-CA-C  | -7.63 | 90.40       | 111.00   |
| 1   | A     | 601 | VAL  | O-C-N   | -7.62 | 110.50      | 122.70   |
| 4   | S     | 139 | GLY  | C-N-CA  | -7.62 | 102.64      | 121.70   |
| 1   | A     | 469 | LEU  | CA-C-O  | 7.61  | 136.07      | 120.10   |
| 2   | B     | 51  | LEU  | C-N-CA  | -7.61 | 102.68      | 121.70   |
| 4   | S     | 28  | GLN  | O-C-N   | 7.60  | 134.86      | 122.70   |
| 1   | A     | 601 | VAL  | C-N-CA  | -7.59 | 102.72      | 121.70   |
| 2   | B     | 486 | HIS  | O-C-N   | 7.59  | 134.85      | 122.70   |
| 2   | B     | 585 | GLY  | N-CA-C  | -7.58 | 94.14       | 113.10   |
| 4   | S     | 27  | LYS  | O-C-N   | 7.57  | 134.81      | 122.70   |
| 1   | A     | 279 | LEU  | O-C-N   | -7.57 | 110.60      | 122.70   |
| 1   | A     | 504 | ILE  | CA-C-O  | 7.55  | 135.96      | 120.10   |
| 1   | A     | 465 | SER  | N-CA-C  | 7.55  | 131.38      | 111.00   |
| 1   | A     | 98  | ASN  | CA-C-N  | 7.54  | 133.80      | 117.20   |
| 2   | B     | 237 | ILE  | C-N-CA  | -7.54 | 102.86      | 121.70   |
| 1   | A     | 528 | ASN  | CA-C-O  | 7.54  | 135.93      | 120.10   |
| 3   | M     | 265 | ASN  | N-CA-C  | -7.53 | 90.66       | 111.00   |
| 2   | B     | 488 | ARG  | O-C-N   | 7.53  | 134.75      | 122.70   |
| 1   | A     | 88  | ASN  | CA-C-O  | 7.53  | 135.91      | 120.10   |
| 2   | B     | 277 | CYS  | C-N-CD  | 7.53  | 144.20      | 128.40   |

*Continued on next page...*

*Continued from previous page...*

| Mol | Chain | Res | Type | Atoms   | Z     | Observed(°) | Ideal(°) |
|-----|-------|-----|------|---------|-------|-------------|----------|
| 1   | A     | 338 | PHE  | O-C-N   | 7.52  | 134.73      | 122.70   |
| 3   | M     | 230 | LYS  | CA-C-N  | 7.51  | 133.73      | 117.20   |
| 1   | A     | 596 | VAL  | O-C-N   | 7.50  | 134.70      | 122.70   |
| 2   | B     | 46  | GLN  | O-C-N   | 7.50  | 134.70      | 122.70   |
| 4   | S     | 55  | PRO  | CA-N-CD | -7.50 | 101.00      | 111.50   |
| 2   | B     | 416 | LYS  | O-C-N   | 7.48  | 134.66      | 122.70   |
| 2   | B     | 215 | TYR  | O-C-N   | 7.47  | 134.65      | 122.70   |
| 1   | A     | 394 | GLN  | O-C-N   | 7.46  | 134.64      | 122.70   |
| 2   | B     | 442 | LEU  | C-N-CA  | -7.45 | 103.07      | 121.70   |
| 3   | M     | 266 | ASP  | CA-C-N  | -7.44 | 100.83      | 117.20   |
| 3   | M     | 367 | ALA  | CB-CA-C | 7.44  | 121.26      | 110.10   |
| 4   | S     | 96  | LEU  | O-C-N   | 7.43  | 134.59      | 122.70   |
| 2   | B     | 325 | LEU  | CA-C-O  | 7.43  | 135.70      | 120.10   |
| 1   | A     | 465 | SER  | O-C-N   | 7.42  | 134.58      | 122.70   |
| 2   | B     | 328 | LEU  | C-N-CA  | -7.42 | 103.14      | 121.70   |
| 1   | A     | 606 | PHE  | O-C-N   | 7.42  | 134.57      | 122.70   |
| 2   | B     | 494 | ALA  | O-C-N   | 7.42  | 134.56      | 122.70   |
| 1   | A     | 519 | LEU  | O-C-N   | -7.41 | 110.61      | 123.20   |
| 2   | B     | 428 | VAL  | O-C-N   | 7.41  | 134.55      | 122.70   |
| 2   | B     | 362 | ALA  | O-C-N   | 7.37  | 134.49      | 122.70   |
| 1   | A     | 311 | THR  | O-C-N   | 7.37  | 134.49      | 122.70   |
| 3   | M     | 407 | THR  | N-CA-C  | -7.36 | 91.12       | 111.00   |
| 1   | A     | 391 | LEU  | O-C-N   | -7.35 | 110.94      | 122.70   |
| 2   | B     | 142 | LEU  | C-N-CA  | -7.34 | 103.35      | 121.70   |
| 3   | M     | 421 | GLY  | O-C-N   | -7.34 | 107.16      | 121.10   |
| 4   | S     | 54  | PRO  | C-N-CD  | 7.33  | 143.79      | 128.40   |
| 1   | A     | 405 | THR  | N-CA-C  | 7.33  | 130.78      | 111.00   |
| 2   | B     | 493 | LEU  | O-C-N   | 7.32  | 134.42      | 122.70   |
| 1   | A     | 177 | ILE  | O-C-N   | 7.32  | 134.41      | 122.70   |
| 1   | A     | 256 | LEU  | O-C-N   | 7.32  | 134.41      | 122.70   |
| 4   | S     | 31  | LEU  | O-C-N   | 7.31  | 134.40      | 122.70   |
| 2   | B     | 223 | LEU  | O-C-N   | -7.30 | 111.01      | 122.70   |
| 4   | S     | 149 | ILE  | O-C-N   | 7.30  | 134.39      | 122.70   |
| 2   | B     | 192 | LEU  | O-C-N   | 7.30  | 134.38      | 122.70   |
| 2   | B     | 288 | TYR  | N-CA-C  | -7.30 | 91.29       | 111.00   |
| 1   | A     | 260 | PHE  | C-N-CA  | -7.30 | 103.46      | 121.70   |
| 1   | A     | 162 | ILE  | O-C-N   | 7.29  | 134.37      | 122.70   |
| 2   | B     | 515 | PHE  | O-C-N   | -7.29 | 110.80      | 123.20   |
| 4   | S     | 167 | ILE  | N-CA-C  | 7.29  | 130.68      | 111.00   |
| 1   | A     | 511 | VAL  | O-C-N   | 7.29  | 134.36      | 122.70   |
| 4   | S     | 80  | TYR  | CA-C-O  | 7.28  | 135.40      | 120.10   |
| 2   | B     | 408 | VAL  | O-C-N   | 7.27  | 134.34      | 122.70   |

*Continued on next page...*

*Continued from previous page...*

| Mol | Chain | Res | Type | Atoms   | Z     | Observed(°) | Ideal(°) |
|-----|-------|-----|------|---------|-------|-------------|----------|
| 2   | B     | 220 | ALA  | CB-CA-C | 7.27  | 121.00      | 110.10   |
| 2   | B     | 270 | SER  | N-CA-C  | -7.27 | 91.37       | 111.00   |
| 2   | B     | 531 | ARG  | O-C-N   | 7.27  | 134.33      | 122.70   |
| 1   | A     | 399 | ASP  | O-C-N   | 7.26  | 134.32      | 122.70   |
| 4   | S     | 127 | THR  | O-C-N   | 7.26  | 134.32      | 122.70   |
| 1   | A     | 384 | LEU  | O-C-N   | 7.26  | 134.31      | 122.70   |
| 2   | B     | 267 | ASP  | O-C-N   | -7.26 | 111.09      | 122.70   |
| 2   | B     | 554 | LYS  | O-C-N   | 7.25  | 134.30      | 122.70   |
| 3   | M     | 426 | LYS  | C-N-CA  | 7.25  | 139.82      | 121.70   |
| 3   | M     | 460 | ILE  | C-N-CA  | 7.23  | 137.49      | 122.30   |
| 1   | A     | 573 | GLU  | C-N-CA  | -7.23 | 103.64      | 121.70   |
| 1   | A     | 529 | GLY  | N-CA-C  | -7.21 | 95.08       | 113.10   |
| 1   | A     | 265 | GLN  | CA-C-O  | -7.17 | 105.04      | 120.10   |
| 4   | S     | 83  | LEU  | CA-C-O  | 7.17  | 135.16      | 120.10   |
| 1   | A     | 306 | GLU  | O-C-N   | -7.17 | 111.23      | 122.70   |
| 4   | S     | 125 | TRP  | CA-C-O  | -7.16 | 105.06      | 120.10   |
| 3   | M     | 54  | SER  | C-N-CA  | 7.16  | 139.60      | 121.70   |
| 1   | A     | 298 | ILE  | CA-C-O  | 7.16  | 135.14      | 120.10   |
| 2   | B     | 150 | LEU  | O-C-N   | 7.15  | 134.14      | 122.70   |
| 2   | B     | 243 | TRP  | O-C-N   | 7.15  | 134.14      | 122.70   |
| 1   | A     | 441 | TYR  | CA-C-N  | -7.15 | 101.48      | 117.20   |
| 2   | B     | 478 | LEU  | CA-C-O  | 7.14  | 135.10      | 120.10   |
| 1   | A     | 300 | LYS  | N-CA-C  | 7.14  | 130.28      | 111.00   |
| 2   | B     | 415 | LEU  | O-C-N   | 7.14  | 134.12      | 122.70   |
| 1   | A     | 263 | LEU  | C-N-CA  | -7.13 | 103.87      | 121.70   |
| 3   | M     | 96  | ILE  | O-C-N   | 7.13  | 134.10      | 122.70   |
| 1   | A     | 388 | VAL  | O-C-N   | 7.12  | 134.09      | 122.70   |
| 1   | A     | 447 | PHE  | O-C-N   | 7.12  | 134.09      | 122.70   |
| 3   | M     | 118 | TYR  | CA-C-O  | -7.11 | 105.17      | 120.10   |
| 1   | A     | 517 | TRP  | O-C-N   | 7.11  | 134.08      | 122.70   |
| 1   | A     | 488 | ARG  | O-C-N   | 7.11  | 134.07      | 122.70   |
| 1   | A     | 355 | LEU  | O-C-N   | 7.10  | 134.06      | 122.70   |
| 2   | B     | 23  | ALA  | N-CA-CB | 7.09  | 120.03      | 110.10   |
| 1   | A     | 582 | ILE  | O-C-N   | 7.09  | 134.04      | 122.70   |
| 1   | A     | 381 | GLU  | O-C-N   | -7.08 | 111.36      | 122.70   |
| 4   | S     | 84  | TYR  | O-C-N   | -7.08 | 111.37      | 122.70   |
| 2   | B     | 611 | ALA  | O-C-N   | 7.08  | 134.02      | 122.70   |
| 1   | A     | 539 | ASN  | C-N-CA  | -7.08 | 104.01      | 121.70   |
| 2   | B     | 226 | LEU  | O-C-N   | 7.08  | 134.02      | 122.70   |
| 1   | A     | 453 | VAL  | O-C-N   | 7.07  | 134.01      | 122.70   |
| 2   | B     | 521 | ILE  | C-N-CA  | -7.07 | 104.03      | 121.70   |
| 2   | B     | 213 | LEU  | O-C-N   | 7.05  | 133.99      | 122.70   |

*Continued on next page...*



*Continued from previous page...*

| Mol | Chain | Res | Type | Atoms   | Z     | Observed(°) | Ideal(°) |
|-----|-------|-----|------|---------|-------|-------------|----------|
| 4   | S     | 99  | LEU  | CA-C-O  | -7.05 | 105.29      | 120.10   |
| 3   | M     | 110 | SER  | O-C-N   | 7.05  | 133.98      | 122.70   |
| 2   | B     | 555 | LEU  | O-C-N   | 7.05  | 133.97      | 122.70   |
| 1   | A     | 566 | PHE  | N-CA-C  | 7.04  | 130.02      | 111.00   |
| 2   | B     | 504 | ALA  | O-C-N   | 7.04  | 133.97      | 122.70   |
| 2   | B     | 526 | CYS  | O-C-N   | 7.04  | 134.48      | 121.10   |
| 1   | A     | 166 | LEU  | O-C-N   | 7.03  | 133.95      | 122.70   |
| 1   | A     | 441 | TYR  | CA-C-O  | 7.03  | 134.86      | 120.10   |
| 1   | A     | 302 | ASN  | CA-C-N  | -7.03 | 101.74      | 117.20   |
| 4   | S     | 30  | LEU  | O-C-N   | 7.03  | 133.94      | 122.70   |
| 1   | A     | 442 | SER  | N-CA-C  | -7.02 | 92.04       | 111.00   |
| 1   | A     | 225 | LEU  | CA-C-O  | -7.02 | 105.36      | 120.10   |
| 1   | A     | 635 | ALA  | O-C-N   | 7.02  | 133.93      | 122.70   |
| 2   | B     | 389 | ILE  | C-N-CA  | -7.01 | 104.17      | 121.70   |
| 2   | B     | 143 | SER  | C-N-CA  | -7.01 | 104.17      | 121.70   |
| 3   | M     | 458 | LEU  | C-N-CA  | 7.00  | 139.21      | 121.70   |
| 3   | M     | 425 | THR  | C-N-CA  | 7.00  | 139.19      | 121.70   |
| 1   | A     | 271 | ARG  | O-C-N   | 6.99  | 133.88      | 122.70   |
| 2   | B     | 97  | VAL  | O-C-N   | 6.99  | 133.88      | 122.70   |
| 1   | A     | 225 | LEU  | O-C-N   | 6.99  | 133.88      | 122.70   |
| 2   | B     | 422 | ALA  | N-CA-CB | 6.99  | 119.88      | 110.10   |
| 1   | A     | 301 | GLY  | N-CA-C  | -6.98 | 95.64       | 113.10   |
| 2   | B     | 572 | GLU  | O-C-N   | 6.98  | 133.87      | 122.70   |
| 1   | A     | 605 | GLU  | O-C-N   | 6.98  | 133.87      | 122.70   |
| 4   | S     | 143 | GLU  | CA-C-N  | -6.98 | 101.84      | 117.20   |
| 1   | A     | 476 | GLN  | O-C-N   | 6.98  | 133.87      | 122.70   |
| 2   | B     | 216 | LYS  | C-N-CA  | -6.96 | 104.29      | 121.70   |
| 1   | A     | 140 | VAL  | O-C-N   | -6.96 | 111.56      | 122.70   |
| 1   | A     | 257 | LEU  | O-C-N   | 6.96  | 133.83      | 122.70   |
| 2   | B     | 56  | SER  | C-N-CA  | -6.96 | 104.31      | 121.70   |
| 1   | A     | 156 | PRO  | C-N-CA  | -6.96 | 104.31      | 121.70   |
| 2   | B     | 102 | HIS  | CA-C-O  | 6.95  | 134.70      | 120.10   |
| 2   | B     | 355 | ASN  | O-C-N   | 6.95  | 133.82      | 122.70   |
| 1   | A     | 138 | ASN  | O-C-N   | 6.95  | 133.82      | 122.70   |
| 2   | B     | 324 | ALA  | O-C-N   | 6.95  | 133.82      | 122.70   |
| 2   | B     | 425 | PRO  | O-C-N   | 6.95  | 133.82      | 122.70   |
| 2   | B     | 104 | TYR  | O-C-N   | 6.94  | 133.80      | 122.70   |
| 2   | B     | 559 | ASP  | O-C-N   | 6.93  | 133.79      | 122.70   |
| 2   | B     | 252 | LEU  | O-C-N   | 6.92  | 133.78      | 122.70   |
| 1   | A     | 204 | VAL  | C-N-CA  | -6.92 | 104.40      | 121.70   |
| 1   | A     | 607 | LEU  | O-C-N   | 6.91  | 133.75      | 122.70   |
| 2   | B     | 99  | ARG  | O-C-N   | 6.90  | 133.74      | 122.70   |

*Continued on next page...*

*Continued from previous page...*

| Mol | Chain | Res | Type | Atoms   | Z     | Observed(°) | Ideal(°) |
|-----|-------|-----|------|---------|-------|-------------|----------|
| 1   | A     | 240 | LEU  | O-C-N   | -6.90 | 111.66      | 122.70   |
| 1   | A     | 348 | PHE  | O-C-N   | 6.90  | 133.73      | 122.70   |
| 2   | B     | 271 | GLU  | C-N-CA  | -6.89 | 107.83      | 122.30   |
| 2   | B     | 511 | ILE  | O-C-N   | -6.89 | 111.68      | 122.70   |
| 1   | A     | 383 | ASN  | O-C-N   | 6.89  | 133.72      | 122.70   |
| 1   | A     | 621 | LEU  | C-N-CA  | -6.88 | 93.09       | 122.00   |
| 2   | B     | 169 | VAL  | O-C-N   | 6.88  | 133.72      | 122.70   |
| 1   | A     | 279 | LEU  | C-N-CA  | -6.88 | 104.50      | 121.70   |
| 1   | A     | 457 | LEU  | O-C-N   | 6.88  | 133.71      | 122.70   |
| 1   | A     | 608 | ARG  | O-C-N   | 6.88  | 133.70      | 122.70   |
| 4   | S     | 18  | LYS  | O-C-N   | -6.88 | 111.69      | 122.70   |
| 2   | B     | 573 | GLU  | C-N-CA  | -6.87 | 104.52      | 121.70   |
| 1   | A     | 632 | PHE  | O-C-N   | 6.87  | 133.69      | 122.70   |
| 2   | B     | 323 | ASN  | O-C-N   | 6.87  | 133.69      | 122.70   |
| 4   | S     | 157 | ASN  | O-C-N   | 6.87  | 133.69      | 122.70   |
| 2   | B     | 134 | LEU  | O-C-N   | 6.86  | 133.68      | 122.70   |
| 4   | S     | 99  | LEU  | O-C-N   | 6.86  | 133.67      | 122.70   |
| 1   | A     | 140 | VAL  | CA-C-O  | 6.86  | 134.50      | 120.10   |
| 2   | B     | 105 | LEU  | C-N-CA  | -6.85 | 104.58      | 121.70   |
| 4   | S     | 33  | GLU  | O-C-N   | 6.85  | 133.65      | 122.70   |
| 3   | M     | 89  | CYS  | O-C-N   | 6.84  | 133.65      | 122.70   |
| 2   | B     | 544 | THR  | O-C-N   | 6.84  | 133.65      | 122.70   |
| 1   | A     | 102 | GLN  | O-C-N   | 6.84  | 133.64      | 122.70   |
| 1   | A     | 602 | GLU  | O-C-N   | 6.83  | 133.63      | 122.70   |
| 1   | A     | 555 | LEU  | O-C-N   | 6.83  | 133.63      | 122.70   |
| 2   | B     | 63  | MET  | O-C-N   | 6.83  | 133.63      | 122.70   |
| 1   | A     | 610 | SER  | O-C-N   | 6.82  | 133.61      | 122.70   |
| 2   | B     | 568 | VAL  | C-N-CA  | 6.82  | 138.74      | 121.70   |
| 2   | B     | 594 | ALA  | O-C-N   | 6.81  | 133.60      | 122.70   |
| 3   | M     | 123 | LEU  | O-C-N   | 6.81  | 133.60      | 122.70   |
| 1   | A     | 623 | MET  | O-C-N   | 6.81  | 133.60      | 122.70   |
| 2   | B     | 66  | ILE  | O-C-N   | 6.81  | 133.60      | 122.70   |
| 1   | A     | 477 | PHE  | O-C-N   | 6.81  | 133.59      | 122.70   |
| 2   | B     | 457 | HIS  | CA-C-O  | 6.81  | 134.39      | 120.10   |
| 1   | A     | 236 | LEU  | O-C-N   | 6.81  | 133.59      | 122.70   |
| 1   | A     | 188 | VAL  | O-C-N   | 6.80  | 133.59      | 122.70   |
| 4   | S     | 148 | ARG  | O-C-N   | 6.80  | 133.58      | 122.70   |
| 1   | A     | 496 | ILE  | O-C-N   | 6.79  | 133.56      | 122.70   |
| 1   | A     | 624 | LEU  | O-C-N   | 6.79  | 133.56      | 122.70   |
| 2   | B     | 454 | LEU  | O-C-N   | 6.79  | 133.56      | 122.70   |
| 3   | M     | 54  | SER  | CB-CA-C | -6.78 | 97.21       | 110.10   |
| 2   | B     | 174 | ALA  | C-N-CA  | -6.78 | 104.76      | 121.70   |

*Continued on next page...*

*Continued from previous page...*

| Mol | Chain | Res | Type | Atoms   | Z     | Observed(°) | Ideal(°) |
|-----|-------|-----|------|---------|-------|-------------|----------|
| 3   | M     | 54  | SER  | CA-C-N  | -6.78 | 102.29      | 117.20   |
| 4   | S     | 101 | LEU  | O-C-N   | 6.78  | 133.54      | 122.70   |
| 2   | B     | 489 | ILE  | O-C-N   | 6.78  | 133.54      | 122.70   |
| 1   | A     | 466 | ASP  | O-C-N   | 6.77  | 133.54      | 122.70   |
| 2   | B     | 100 | LEU  | O-C-N   | 6.76  | 133.52      | 122.70   |
| 3   | M     | 47  | SER  | N-CA-C  | -6.76 | 92.74       | 111.00   |
| 2   | B     | 411 | ILE  | O-C-N   | 6.75  | 133.51      | 122.70   |
| 3   | M     | 385 | ARG  | O-C-N   | -6.75 | 111.89      | 122.70   |
| 4   | S     | 16  | LEU  | O-C-N   | -6.75 | 111.89      | 122.70   |
| 1   | A     | 581 | LEU  | O-C-N   | 6.75  | 133.50      | 122.70   |
| 1   | A     | 601 | VAL  | CA-C-O  | 6.75  | 134.28      | 120.10   |
| 2   | B     | 78  | ASP  | O-C-N   | -6.75 | 111.90      | 122.70   |
| 1   | A     | 67  | LYS  | O-C-N   | 6.75  | 133.49      | 122.70   |
| 1   | A     | 418 | ILE  | N-CA-C  | 6.73  | 129.18      | 111.00   |
| 2   | B     | 253 | ILE  | O-C-N   | 6.73  | 133.47      | 122.70   |
| 1   | A     | 125 | THR  | O-C-N   | 6.72  | 133.46      | 122.70   |
| 3   | M     | 424 | PHE  | N-CA-C  | -6.72 | 92.85       | 111.00   |
| 2   | B     | 452 | LYS  | O-C-N   | 6.72  | 133.45      | 122.70   |
| 3   | M     | 425 | THR  | N-CA-C  | -6.72 | 92.86       | 111.00   |
| 1   | A     | 91  | ILE  | O-C-N   | 6.71  | 133.44      | 122.70   |
| 1   | A     | 265 | GLN  | N-CA-CB | 6.71  | 122.69      | 110.60   |
| 4   | S     | 128 | LEU  | O-C-N   | 6.71  | 133.44      | 122.70   |
| 2   | B     | 566 | ALA  | CB-CA-C | 6.71  | 120.17      | 110.10   |
| 3   | M     | 85  | GLY  | N-CA-C  | -6.71 | 96.33       | 113.10   |
| 2   | B     | 592 | TYR  | O-C-N   | 6.70  | 133.42      | 122.70   |
| 1   | A     | 432 | ILE  | CA-C-O  | -6.69 | 106.05      | 120.10   |
| 1   | A     | 87  | CYS  | O-C-N   | 6.69  | 133.40      | 122.70   |
| 1   | A     | 117 | ASP  | O-C-N   | 6.69  | 133.40      | 122.70   |
| 1   | A     | 307 | ASP  | N-CA-C  | -6.68 | 92.95       | 111.00   |
| 3   | M     | 265 | ASN  | CA-C-N  | 6.68  | 131.91      | 117.20   |
| 3   | M     | 284 | SER  | O-C-N   | -6.68 | 108.41      | 121.10   |
| 4   | S     | 137 | GLN  | CA-C-N  | -6.68 | 102.84      | 116.20   |
| 1   | A     | 128 | LEU  | O-C-N   | 6.68  | 133.38      | 122.70   |
| 1   | A     | 472 | LYS  | O-C-N   | 6.68  | 133.38      | 122.70   |
| 1   | A     | 196 | LEU  | CA-C-O  | 6.68  | 134.12      | 120.10   |
| 1   | A     | 569 | ASP  | O-C-N   | -6.68 | 112.02      | 122.70   |
| 3   | M     | 113 | LYS  | O-C-N   | 6.68  | 133.38      | 122.70   |
| 2   | B     | 356 | LYS  | O-C-N   | 6.67  | 133.38      | 122.70   |
| 2   | B     | 154 | ILE  | CA-C-O  | -6.67 | 106.09      | 120.10   |
| 3   | M     | 16  | PHE  | CA-C-O  | 6.67  | 134.10      | 120.10   |
| 2   | B     | 139 | LEU  | O-C-N   | 6.67  | 133.37      | 122.70   |
| 4   | S     | 150 | VAL  | O-C-N   | 6.67  | 133.36      | 122.70   |

*Continued on next page...*

*Continued from previous page...*

| Mol | Chain | Res | Type | Atoms   | Z     | Observed(°) | Ideal(°) |
|-----|-------|-----|------|---------|-------|-------------|----------|
| 2   | B     | 361 | GLN  | O-C-N   | 6.66  | 133.36      | 122.70   |
| 1   | A     | 392 | MET  | O-C-N   | 6.66  | 133.35      | 122.70   |
| 2   | B     | 460 | SER  | N-CA-C  | 6.66  | 128.97      | 111.00   |
| 2   | B     | 607 | ILE  | O-C-N   | 6.66  | 133.35      | 122.70   |
| 4   | S     | 54  | PRO  | N-CA-C  | -6.66 | 94.79       | 112.10   |
| 2   | B     | 244 | SER  | O-C-N   | 6.65  | 133.34      | 122.70   |
| 2   | B     | 589 | SER  | O-C-N   | 6.65  | 133.34      | 122.70   |
| 2   | B     | 337 | THR  | CA-C-O  | -6.65 | 106.14      | 120.10   |
| 2   | B     | 399 | LEU  | C-N-CA  | -6.65 | 105.08      | 121.70   |
| 2   | B     | 412 | PHE  | O-C-N   | 6.65  | 133.34      | 122.70   |
| 1   | A     | 107 | TYR  | O-C-N   | 6.64  | 133.33      | 122.70   |
| 2   | B     | 273 | SER  | N-CA-CB | -6.64 | 100.53      | 110.50   |
| 1   | A     | 265 | GLN  | O-C-N   | -6.64 | 112.07      | 122.70   |
| 2   | B     | 65  | ARG  | O-C-N   | 6.64  | 133.32      | 122.70   |
| 1   | A     | 522 | PHE  | O-C-N   | 6.63  | 133.31      | 122.70   |
| 1   | A     | 600 | SER  | O-C-N   | 6.63  | 133.31      | 122.70   |
| 2   | B     | 447 | GLU  | O-C-N   | 6.63  | 133.31      | 122.70   |
| 1   | A     | 462 | GLN  | C-N-CA  | -6.63 | 105.13      | 121.70   |
| 1   | A     | 296 | ASN  | O-C-N   | 6.63  | 133.30      | 122.70   |
| 3   | M     | 394 | GLN  | CA-C-O  | 6.63  | 134.02      | 120.10   |
| 2   | B     | 552 | SER  | O-C-N   | 6.62  | 133.30      | 122.70   |
| 4   | S     | 106 | VAL  | O-C-N   | 6.62  | 133.30      | 122.70   |
| 2   | B     | 521 | ILE  | N-CA-C  | -6.62 | 93.12       | 111.00   |
| 1   | A     | 515 | CYS  | O-C-N   | 6.62  | 133.29      | 122.70   |
| 1   | A     | 556 | VAL  | O-C-N   | 6.60  | 133.26      | 122.70   |
| 1   | A     | 436 | CYS  | O-C-N   | -6.59 | 112.15      | 122.70   |
| 4   | S     | 35  | VAL  | O-C-N   | 6.59  | 133.25      | 122.70   |
| 1   | A     | 80  | TYR  | N-CA-CB | 6.59  | 122.46      | 110.60   |
| 2   | B     | 123 | LEU  | CA-C-O  | -6.59 | 106.27      | 120.10   |
| 2   | B     | 267 | ASP  | C-N-CA  | -6.58 | 105.24      | 121.70   |
| 1   | A     | 139 | ASP  | O-C-N   | 6.58  | 133.23      | 122.70   |
| 1   | A     | 558 | VAL  | O-C-N   | 6.58  | 133.23      | 122.70   |
| 2   | B     | 267 | ASP  | CA-C-O  | 6.58  | 133.93      | 120.10   |
| 2   | B     | 591 | MET  | O-C-N   | 6.58  | 133.23      | 122.70   |
| 1   | A     | 554 | ALA  | O-C-N   | 6.58  | 133.23      | 122.70   |
| 1   | A     | 611 | LEU  | O-C-N   | 6.58  | 133.23      | 122.70   |
| 4   | S     | 32  | LEU  | O-C-N   | 6.58  | 133.23      | 122.70   |
| 2   | B     | 123 | LEU  | O-C-N   | 6.58  | 133.22      | 122.70   |
| 2   | B     | 251 | LEU  | O-C-N   | 6.58  | 133.22      | 122.70   |
| 1   | A     | 495 | ILE  | O-C-N   | 6.57  | 133.21      | 122.70   |
| 1   | A     | 332 | TYR  | O-C-N   | 6.57  | 133.21      | 122.70   |
| 2   | B     | 475 | ILE  | O-C-N   | 6.57  | 133.21      | 122.70   |

*Continued on next page...*

*Continued from previous page...*

| Mol | Chain | Res | Type | Atoms  | Z     | Observed(°) | Ideal(°) |
|-----|-------|-----|------|--------|-------|-------------|----------|
| 1   | A     | 406 | GLY  | N-CA-C | -6.57 | 96.69       | 113.10   |
| 2   | B     | 62  | ALA  | O-C-N  | 6.57  | 133.21      | 122.70   |
| 2   | B     | 474 | VAL  | O-C-N  | 6.57  | 133.20      | 122.70   |
| 1   | A     | 454 | ILE  | O-C-N  | 6.56  | 133.19      | 122.70   |
| 4   | S     | 29  | LYS  | O-C-N  | 6.56  | 133.19      | 122.70   |
| 2   | B     | 359 | LEU  | O-C-N  | 6.55  | 133.19      | 122.70   |
| 1   | A     | 507 | GLN  | C-N-CA | -6.55 | 105.33      | 121.70   |
| 2   | B     | 513 | TRP  | O-C-N  | 6.54  | 133.17      | 122.70   |
| 2   | B     | 508 | ARG  | CA-C-O | 6.54  | 133.83      | 120.10   |
| 1   | A     | 562 | TRP  | O-C-N  | 6.54  | 133.16      | 122.70   |
| 1   | A     | 145 | ILE  | O-C-N  | 6.53  | 133.15      | 122.70   |
| 1   | A     | 451 | ASN  | O-C-N  | 6.53  | 133.15      | 122.70   |
| 2   | B     | 346 | THR  | O-C-N  | 6.53  | 133.15      | 122.70   |
| 1   | A     | 386 | ALA  | O-C-N  | 6.53  | 133.15      | 122.70   |
| 2   | B     | 604 | GLU  | O-C-N  | 6.53  | 133.15      | 122.70   |
| 2   | B     | 301 | LEU  | O-C-N  | 6.53  | 133.14      | 122.70   |
| 1   | A     | 492 | ILE  | O-C-N  | 6.52  | 133.14      | 122.70   |
| 2   | B     | 588 | ILE  | O-C-N  | 6.52  | 133.13      | 122.70   |
| 2   | B     | 453 | TRP  | O-C-N  | 6.51  | 133.12      | 122.70   |
| 3   | M     | 458 | LEU  | N-CA-C | -6.51 | 93.42       | 111.00   |
| 3   | M     | 394 | GLN  | O-C-N  | -6.51 | 112.14      | 123.20   |
| 2   | B     | 467 | VAL  | O-C-N  | 6.51  | 133.11      | 122.70   |
| 2   | B     | 154 | ILE  | O-C-N  | 6.50  | 133.11      | 122.70   |
| 4   | S     | 129 | GLU  | O-C-N  | 6.50  | 133.10      | 122.70   |
| 2   | B     | 388 | PRO  | C-N-CA | 6.50  | 137.94      | 121.70   |
| 2   | B     | 177 | ILE  | O-C-N  | 6.50  | 133.09      | 122.70   |
| 1   | A     | 612 | GLU  | O-C-N  | 6.50  | 133.09      | 122.70   |
| 2   | B     | 344 | VAL  | O-C-N  | 6.49  | 133.09      | 122.70   |
| 4   | S     | 83  | LEU  | O-C-N  | -6.49 | 112.31      | 122.70   |
| 2   | B     | 137 | PHE  | O-C-N  | 6.49  | 133.09      | 122.70   |
| 2   | B     | 146 | LYS  | CA-C-N | 6.49  | 131.48      | 117.20   |
| 4   | S     | 4   | ALA  | CA-C-O | 6.49  | 133.73      | 120.10   |
| 2   | B     | 507 | ALA  | O-C-N  | 6.49  | 133.08      | 122.70   |
| 1   | A     | 569 | ASP  | CA-C-O | -6.49 | 106.48      | 120.10   |
| 4   | S     | 124 | ASN  | O-C-N  | 6.49  | 133.08      | 122.70   |
| 2   | B     | 119 | SER  | O-C-N  | 6.48  | 133.07      | 122.70   |
| 3   | M     | 91  | THR  | O-C-N  | 6.48  | 133.07      | 122.70   |
| 3   | M     | 124 | ILE  | O-C-N  | 6.48  | 133.07      | 122.70   |
| 4   | S     | 106 | VAL  | CA-C-O | -6.48 | 106.49      | 120.10   |
| 4   | S     | 130 | SER  | O-C-N  | 6.48  | 133.07      | 122.70   |
| 2   | B     | 548 | ILE  | O-C-N  | 6.48  | 133.06      | 122.70   |
| 3   | M     | 122 | SER  | O-C-N  | 6.48  | 133.06      | 122.70   |

*Continued on next page...*

*Continued from previous page...*

| Mol | Chain | Res | Type | Atoms  | Z     | Observed(°) | Ideal(°) |
|-----|-------|-----|------|--------|-------|-------------|----------|
| 2   | B     | 145 | MET  | C-N-CA | -6.46 | 105.56      | 121.70   |
| 2   | B     | 230 | PHE  | O-C-N  | -6.46 | 112.37      | 122.70   |
| 1   | A     | 146 | ALA  | O-C-N  | 6.45  | 133.02      | 122.70   |
| 4   | S     | 145 | ASN  | O-C-N  | 6.45  | 133.02      | 122.70   |
| 1   | A     | 105 | VAL  | O-C-N  | 6.45  | 134.16      | 123.20   |
| 3   | M     | 94  | GLU  | O-C-N  | 6.45  | 133.01      | 122.70   |
| 3   | M     | 389 | SER  | O-C-N  | 6.44  | 133.01      | 122.70   |
| 1   | A     | 388 | VAL  | CA-C-O | -6.44 | 106.57      | 120.10   |
| 2   | B     | 229 | HIS  | C-N-CA | 6.44  | 137.80      | 121.70   |
| 1   | A     | 64  | LEU  | CA-C-O | 6.44  | 133.62      | 120.10   |
| 1   | A     | 185 | LEU  | O-C-N  | 6.43  | 132.99      | 122.70   |
| 2   | B     | 81  | LEU  | C-N-CA | -6.43 | 105.62      | 121.70   |
| 2   | B     | 363 | ILE  | O-C-N  | 6.43  | 132.99      | 122.70   |
| 2   | B     | 587 | ARG  | O-C-N  | 6.42  | 132.96      | 122.70   |
| 3   | M     | 457 | GLY  | CA-C-N | -6.41 | 103.10      | 117.20   |
| 2   | B     | 490 | ILE  | O-C-N  | 6.41  | 132.95      | 122.70   |
| 2   | B     | 306 | LEU  | CA-C-O | -6.40 | 106.65      | 120.10   |
| 1   | A     | 252 | ILE  | O-C-N  | 6.40  | 132.94      | 122.70   |
| 1   | A     | 313 | MET  | O-C-N  | 6.40  | 132.94      | 122.70   |
| 1   | A     | 550 | VAL  | O-C-N  | 6.40  | 132.94      | 122.70   |
| 2   | B     | 414 | GLU  | O-C-N  | 6.40  | 132.93      | 122.70   |
| 1   | A     | 159 | ALA  | O-C-N  | 6.39  | 132.93      | 122.70   |
| 1   | A     | 407 | SER  | N-CA-C | -6.39 | 93.74       | 111.00   |
| 1   | A     | 467 | LYS  | O-C-N  | 6.39  | 132.92      | 122.70   |
| 2   | B     | 135 | ARG  | O-C-N  | 6.39  | 132.92      | 122.70   |
| 1   | A     | 331 | ARG  | O-C-N  | 6.39  | 132.92      | 122.70   |
| 1   | A     | 364 | ASP  | O-C-N  | 6.38  | 132.92      | 122.70   |
| 2   | B     | 193 | LEU  | O-C-N  | 6.38  | 132.92      | 122.70   |
| 1   | A     | 492 | ILE  | CA-C-O | -6.38 | 106.70      | 120.10   |
| 1   | A     | 516 | ILE  | O-C-N  | 6.38  | 132.91      | 122.70   |
| 4   | S     | 155 | GLU  | O-C-N  | 6.38  | 132.91      | 122.70   |
| 1   | A     | 598 | GLU  | O-C-N  | 6.38  | 132.90      | 122.70   |
| 1   | A     | 629 | LEU  | C-N-CA | -6.38 | 95.22       | 122.00   |
| 2   | B     | 102 | HIS  | C-N-CA | -6.38 | 105.76      | 121.70   |
| 1   | A     | 415 | ARG  | C-N-CA | -6.37 | 105.78      | 121.70   |
| 1   | A     | 552 | ILE  | O-C-N  | 6.37  | 132.89      | 122.70   |
| 1   | A     | 215 | VAL  | O-C-N  | -6.37 | 112.52      | 122.70   |
| 2   | B     | 178 | ILE  | O-C-N  | 6.36  | 132.88      | 122.70   |
| 2   | B     | 271 | GLU  | N-CA-C | 6.36  | 128.18      | 111.00   |
| 4   | S     | 165 | SER  | C-N-CA | -6.36 | 105.79      | 121.70   |
| 2   | B     | 170 | ARG  | O-C-N  | -6.36 | 112.38      | 123.20   |
| 1   | A     | 474 | GLY  | O-C-N  | 6.36  | 132.88      | 122.70   |

*Continued on next page...*

*Continued from previous page...*

| Mol | Chain | Res | Type | Atoms   | Z     | Observed(°) | Ideal(°) |
|-----|-------|-----|------|---------|-------|-------------|----------|
| 1   | A     | 186 | PHE  | O-C-N   | 6.36  | 132.87      | 122.70   |
| 1   | A     | 604 | LEU  | O-C-N   | 6.36  | 132.87      | 122.70   |
| 4   | S     | 153 | VAL  | O-C-N   | 6.36  | 132.87      | 122.70   |
| 3   | M     | 111 | ILE  | O-C-N   | 6.35  | 132.87      | 122.70   |
| 2   | B     | 395 | LYS  | O-C-N   | 6.35  | 132.86      | 122.70   |
| 4   | S     | 156 | LEU  | O-C-N   | 6.35  | 132.87      | 122.70   |
| 2   | B     | 151 | ALA  | O-C-N   | 6.35  | 133.17      | 121.10   |
| 1   | A     | 471 | SER  | O-C-N   | 6.35  | 132.86      | 122.70   |
| 2   | B     | 248 | LEU  | O-C-N   | 6.35  | 132.85      | 122.70   |
| 2   | B     | 510 | GLY  | CA-C-O  | -6.35 | 109.18      | 120.60   |
| 1   | A     | 475 | GLU  | O-C-N   | 6.34  | 132.85      | 122.70   |
| 3   | M     | 272 | LEU  | C-N-CA  | 6.34  | 137.55      | 121.70   |
| 2   | B     | 79  | VAL  | CA-C-O  | -6.34 | 106.79      | 120.10   |
| 1   | A     | 603 | VAL  | O-C-N   | 6.33  | 132.84      | 122.70   |
| 1   | A     | 297 | CYS  | O-C-N   | -6.33 | 112.57      | 122.70   |
| 1   | A     | 147 | LEU  | O-C-N   | 6.33  | 132.83      | 122.70   |
| 2   | B     | 519 | ALA  | N-CA-CB | -6.33 | 101.24      | 110.10   |
| 2   | B     | 67  | ILE  | O-C-N   | 6.33  | 132.82      | 122.70   |
| 2   | B     | 417 | TYR  | O-C-N   | 6.33  | 132.82      | 122.70   |
| 2   | B     | 432 | ALA  | O-C-N   | 6.33  | 132.82      | 122.70   |
| 1   | A     | 628 | VAL  | O-C-N   | 6.32  | 132.82      | 122.70   |
| 1   | A     | 387 | ILE  | O-C-N   | 6.32  | 132.81      | 122.70   |
| 4   | S     | 37  | GLU  | O-C-N   | 6.32  | 132.81      | 122.70   |
| 2   | B     | 150 | LEU  | CA-C-O  | -6.32 | 106.83      | 120.10   |
| 2   | B     | 204 | ASP  | O-C-N   | 6.32  | 133.10      | 121.10   |
| 1   | A     | 202 | LYS  | O-C-N   | 6.31  | 132.80      | 122.70   |
| 2   | B     | 59  | VAL  | O-C-N   | 6.31  | 132.80      | 122.70   |
| 2   | B     | 455 | ILE  | O-C-N   | 6.31  | 132.80      | 122.70   |
| 2   | B     | 158 | VAL  | CA-C-O  | -6.31 | 106.85      | 120.10   |
| 2   | B     | 305 | SER  | O-C-N   | 6.31  | 132.79      | 122.70   |
| 2   | B     | 306 | LEU  | O-C-N   | 6.31  | 132.79      | 122.70   |
| 2   | B     | 612 | ARG  | O-C-N   | 6.31  | 132.80      | 122.70   |
| 1   | A     | 578 | LEU  | O-C-N   | 6.31  | 132.79      | 122.70   |
| 2   | B     | 209 | SER  | O-C-N   | 6.31  | 132.79      | 122.70   |
| 2   | B     | 341 | GLU  | O-C-N   | 6.30  | 132.79      | 122.70   |
| 2   | B     | 302 | PHE  | O-C-N   | 6.30  | 132.78      | 122.70   |
| 3   | M     | 86  | PRO  | O-C-N   | 6.30  | 132.78      | 122.70   |
| 1   | A     | 182 | ILE  | O-C-N   | 6.30  | 132.78      | 122.70   |
| 2   | B     | 429 | VAL  | O-C-N   | 6.30  | 132.78      | 122.70   |
| 2   | B     | 610 | ARG  | O-C-N   | 6.30  | 132.78      | 122.70   |
| 4   | S     | 38  | LEU  | O-C-N   | 6.30  | 132.78      | 122.70   |
| 4   | S     | 80  | TYR  | O-C-N   | -6.30 | 112.62      | 122.70   |

*Continued on next page...*

*Continued from previous page...*

| Mol | Chain | Res | Type | Atoms  | Z     | Observed(°) | Ideal(°) |
|-----|-------|-----|------|--------|-------|-------------|----------|
| 1   | A     | 429 | VAL  | O-C-N  | 6.30  | 132.77      | 122.70   |
| 1   | A     | 508 | LEU  | CA-C-O | -6.30 | 106.88      | 120.10   |
| 2   | B     | 613 | MET  | O-C-N  | 6.30  | 132.77      | 122.70   |
| 4   | S     | 105 | PHE  | O-C-N  | 6.30  | 132.77      | 122.70   |
| 1   | A     | 574 | ILE  | O-C-N  | 6.29  | 132.77      | 122.70   |
| 2   | B     | 111 | ASN  | N-CA-C | 6.29  | 127.99      | 111.00   |
| 1   | A     | 337 | LEU  | O-C-N  | 6.29  | 132.76      | 122.70   |
| 1   | A     | 613 | ALA  | O-C-N  | 6.29  | 132.76      | 122.70   |
| 1   | A     | 421 | PRO  | O-C-N  | 6.29  | 132.76      | 122.70   |
| 4   | S     | 120 | ASP  | O-C-N  | 6.29  | 132.76      | 122.70   |
| 4   | S     | 107 | GLU  | O-C-N  | 6.28  | 132.75      | 122.70   |
| 2   | B     | 360 | LEU  | O-C-N  | 6.28  | 132.75      | 122.70   |
| 2   | B     | 437 | SER  | O-C-N  | 6.28  | 132.75      | 122.70   |
| 4   | S     | 1   | MET  | O-C-N  | -6.28 | 112.65      | 122.70   |
| 1   | A     | 522 | PHE  | CA-C-O | -6.28 | 106.92      | 120.10   |
| 2   | B     | 116 | THR  | O-C-N  | 6.28  | 132.74      | 122.70   |
| 1   | A     | 302 | ASN  | CA-C-O | 6.27  | 133.27      | 120.10   |
| 1   | A     | 508 | LEU  | O-C-N  | 6.27  | 133.02      | 121.10   |
| 3   | M     | 55  | MET  | C-N-CA | -6.27 | 106.02      | 121.70   |
| 2   | B     | 43  | ASN  | O-C-N  | 6.27  | 133.01      | 121.10   |
| 1   | A     | 249 | ASN  | O-C-N  | 6.27  | 132.73      | 122.70   |
| 2   | B     | 249 | ILE  | O-C-N  | 6.27  | 132.73      | 122.70   |
| 2   | B     | 158 | VAL  | O-C-N  | 6.27  | 132.73      | 122.70   |
| 1   | A     | 68  | THR  | O-C-N  | 6.26  | 132.72      | 122.70   |
| 2   | B     | 244 | SER  | CA-C-O | -6.26 | 106.95      | 120.10   |
| 2   | B     | 472 | VAL  | CA-C-O | 6.26  | 133.25      | 120.10   |
| 2   | B     | 485 | LYS  | O-C-N  | 6.26  | 132.71      | 122.70   |
| 2   | B     | 595 | VAL  | O-C-N  | 6.26  | 132.71      | 122.70   |
| 1   | A     | 395 | PHE  | C-N-CA | -6.25 | 106.06      | 121.70   |
| 1   | A     | 385 | LYS  | O-C-N  | 6.25  | 132.70      | 122.70   |
| 2   | B     | 374 | PHE  | O-C-N  | 6.25  | 132.70      | 122.70   |
| 2   | B     | 605 | PHE  | O-C-N  | 6.25  | 132.70      | 122.70   |
| 1   | A     | 278 | ILE  | C-N-CA | 6.25  | 137.32      | 121.70   |
| 2   | B     | 321 | CYS  | O-C-N  | 6.25  | 132.69      | 122.70   |
| 2   | B     | 410 | GLU  | O-C-N  | 6.25  | 132.69      | 122.70   |
| 1   | A     | 83  | ASP  | CA-C-N | -6.24 | 103.46      | 117.20   |
| 1   | A     | 315 | CYS  | O-C-N  | 6.24  | 132.69      | 122.70   |
| 1   | A     | 428 | MET  | O-C-N  | 6.24  | 132.69      | 122.70   |
| 2   | B     | 191 | GLU  | O-C-N  | 6.24  | 132.69      | 122.70   |
| 1   | A     | 625 | LEU  | O-C-N  | -6.24 | 112.72      | 122.70   |
| 2   | B     | 58  | GLU  | O-C-N  | 6.24  | 132.68      | 122.70   |
| 1   | A     | 353 | ASP  | O-C-N  | 6.23  | 132.67      | 122.70   |

*Continued on next page...*



*Continued from previous page...*

| Mol | Chain | Res | Type | Atoms  | Z     | Observed(°) | Ideal(°) |
|-----|-------|-----|------|--------|-------|-------------|----------|
| 1   | A     | 419 | ILE  | N-CA-C | 6.23  | 127.83      | 111.00   |
| 2   | B     | 214 | ALA  | O-C-N  | 6.23  | 132.67      | 122.70   |
| 2   | B     | 436 | LEU  | O-C-N  | 6.23  | 132.67      | 122.70   |
| 1   | A     | 124 | ALA  | O-C-N  | 6.23  | 132.66      | 122.70   |
| 1   | A     | 404 | GLN  | C-N-CA | 6.22  | 137.26      | 121.70   |
| 4   | S     | 85  | PHE  | CA-C-O | 6.22  | 133.17      | 120.10   |
| 1   | A     | 473 | ILE  | O-C-N  | 6.22  | 133.78      | 123.20   |
| 2   | B     | 151 | ALA  | CA-C-O | -6.22 | 107.03      | 120.10   |
| 2   | B     | 105 | LEU  | CA-C-O | 6.22  | 133.16      | 120.10   |
| 1   | A     | 579 | LYS  | O-C-N  | 6.22  | 132.65      | 122.70   |
| 2   | B     | 155 | LEU  | O-C-N  | 6.22  | 132.65      | 122.70   |
| 2   | B     | 615 | SER  | O-C-N  | 6.22  | 132.65      | 122.70   |
| 1   | A     | 200 | PHE  | O-C-N  | 6.21  | 132.64      | 122.70   |
| 2   | B     | 409 | LYS  | O-C-N  | 6.21  | 132.64      | 122.70   |
| 2   | B     | 157 | THR  | O-C-N  | 6.21  | 132.64      | 122.70   |
| 2   | B     | 246 | SER  | O-C-N  | 6.21  | 132.63      | 122.70   |
| 3   | M     | 223 | HIS  | O-C-N  | -6.21 | 112.77      | 122.70   |
| 1   | A     | 298 | ILE  | C-N-CA | -6.21 | 106.19      | 121.70   |
| 1   | A     | 421 | PRO  | CA-C-O | -6.20 | 105.31      | 120.20   |
| 1   | A     | 309 | PHE  | O-C-N  | 6.20  | 132.62      | 122.70   |
| 2   | B     | 593 | ASN  | O-C-N  | 6.20  | 132.62      | 122.70   |
| 1   | A     | 141 | VAL  | O-C-N  | 6.20  | 132.61      | 122.70   |
| 2   | B     | 136 | CYS  | O-C-N  | 6.19  | 132.61      | 122.70   |
| 2   | B     | 614 | ILE  | O-C-N  | 6.19  | 132.60      | 122.70   |
| 2   | B     | 27  | THR  | C-N-CA | 6.19  | 137.17      | 121.70   |
| 2   | B     | 433 | VAL  | O-C-N  | 6.19  | 132.60      | 122.70   |
| 1   | A     | 535 | ILE  | CA-C-N | -6.18 | 103.60      | 117.20   |
| 1   | A     | 297 | CYS  | CA-C-O | 6.18  | 133.08      | 120.10   |
| 1   | A     | 316 | LEU  | O-C-N  | 6.18  | 132.59      | 122.70   |
| 1   | A     | 551 | LEU  | O-C-N  | 6.18  | 132.59      | 122.70   |
| 2   | B     | 233 | TYR  | O-C-N  | 6.18  | 132.59      | 122.70   |
| 2   | B     | 337 | THR  | O-C-N  | 6.18  | 132.58      | 122.70   |
| 2   | B     | 468 | LEU  | O-C-N  | 6.17  | 132.58      | 122.70   |
| 2   | B     | 342 | ALA  | O-C-N  | 6.17  | 132.57      | 122.70   |
| 1   | A     | 162 | ILE  | CA-C-O | -6.17 | 107.15      | 120.10   |
| 2   | B     | 550 | VAL  | O-C-N  | 6.16  | 132.56      | 122.70   |
| 2   | B     | 209 | SER  | CA-C-O | -6.16 | 107.17      | 120.10   |
| 1   | A     | 533 | ILE  | CA-C-O | -6.16 | 107.17      | 120.10   |
| 1   | A     | 81  | GLY  | C-N-CA | 6.15  | 137.08      | 121.70   |
| 1   | A     | 607 | LEU  | CA-C-O | -6.15 | 107.18      | 120.10   |
| 1   | A     | 274 | LEU  | C-N-CA | -6.15 | 106.33      | 121.70   |
| 2   | B     | 430 | ILE  | O-C-N  | 6.14  | 132.53      | 122.70   |

*Continued on next page...*

*Continued from previous page...*

| Mol | Chain | Res | Type | Atoms  | Z     | Observed(°) | Ideal(°) |
|-----|-------|-----|------|--------|-------|-------------|----------|
| 1   | A     | 127 | LEU  | O-C-N  | 6.14  | 132.52      | 122.70   |
| 2   | B     | 138 | ALA  | O-C-N  | 6.14  | 132.52      | 122.70   |
| 2   | B     | 296 | ASP  | O-C-N  | 6.14  | 132.76      | 121.10   |
| 2   | B     | 319 | LEU  | O-C-N  | 6.14  | 132.52      | 122.70   |
| 1   | A     | 143 | VAL  | O-C-N  | 6.14  | 133.63      | 123.20   |
| 1   | A     | 323 | CYS  | CA-C-N | 6.14  | 130.70      | 117.20   |
| 2   | B     | 272 | GLY  | N-CA-C | -6.14 | 97.76       | 113.10   |
| 2   | B     | 343 | LEU  | O-C-N  | 6.13  | 132.52      | 122.70   |
| 1   | A     | 295 | VAL  | CA-C-O | -6.13 | 107.22      | 120.10   |
| 1   | A     | 335 | CYS  | O-C-N  | 6.13  | 132.51      | 122.70   |
| 2   | B     | 512 | VAL  | O-C-N  | 6.13  | 132.51      | 122.70   |
| 1   | A     | 295 | VAL  | O-C-N  | 6.13  | 132.50      | 122.70   |
| 2   | B     | 195 | ILE  | O-C-N  | 6.13  | 132.50      | 122.70   |
| 2   | B     | 139 | LEU  | CA-C-O | -6.12 | 107.24      | 120.10   |
| 2   | B     | 324 | ALA  | CA-C-O | -6.12 | 107.24      | 120.10   |
| 1   | A     | 155 | THR  | CA-C-O | -6.12 | 107.25      | 120.10   |
| 2   | B     | 98  | LYS  | O-C-N  | 6.12  | 132.49      | 122.70   |
| 1   | A     | 454 | ILE  | CA-C-O | -6.12 | 107.25      | 120.10   |
| 2   | B     | 464 | SER  | O-C-N  | 6.12  | 132.49      | 122.70   |
| 2   | B     | 549 | LEU  | O-C-N  | 6.11  | 132.47      | 122.70   |
| 2   | B     | 196 | LEU  | O-C-N  | 6.11  | 132.47      | 122.70   |
| 1   | A     | 633 | PHE  | CA-C-O | -6.10 | 107.30      | 120.10   |
| 1   | A     | 390 | THR  | O-C-N  | 6.10  | 132.45      | 122.70   |
| 2   | B     | 585 | GLY  | O-C-N  | 6.09  | 132.45      | 122.70   |
| 1   | A     | 105 | VAL  | C-N-CA | 6.09  | 135.09      | 122.30   |
| 4   | S     | 81  | ALA  | N-CA-C | -6.09 | 94.56       | 111.00   |
| 2   | B     | 82  | TYR  | O-C-N  | -6.09 | 112.96      | 122.70   |
| 1   | A     | 557 | LYS  | O-C-N  | 6.08  | 132.44      | 122.70   |
| 2   | B     | 190 | GLU  | O-C-N  | 6.08  | 132.43      | 122.70   |
| 1   | A     | 336 | ILE  | O-C-N  | 6.08  | 132.43      | 122.70   |
| 2   | B     | 44  | PRO  | O-C-N  | 6.08  | 132.43      | 122.70   |
| 2   | B     | 250 | GLU  | O-C-N  | 6.08  | 132.43      | 122.70   |
| 3   | M     | 308 | SER  | O-C-N  | 6.08  | 132.43      | 122.70   |
| 1   | A     | 271 | ARG  | CA-C-O | -6.08 | 107.34      | 120.10   |
| 1   | A     | 584 | PHE  | O-C-N  | 6.07  | 132.42      | 122.70   |
| 2   | B     | 166 | SER  | O-C-N  | 6.07  | 132.42      | 122.70   |
| 3   | M     | 368 | ASP  | CA-C-O | -6.07 | 107.35      | 120.10   |
| 2   | B     | 47  | LEU  | O-C-N  | 6.07  | 132.41      | 122.70   |
| 3   | M     | 367 | ALA  | N-CA-C | -6.07 | 94.61       | 111.00   |
| 2   | B     | 546 | CYS  | O-C-N  | 6.06  | 132.40      | 122.70   |
| 2   | B     | 568 | VAL  | O-C-N  | 6.06  | 132.40      | 122.70   |
| 2   | B     | 462 | ASN  | C-N-CA | -6.06 | 106.55      | 121.70   |

*Continued on next page...*

*Continued from previous page...*

| Mol | Chain | Res | Type | Atoms  | Z     | Observed(°) | Ideal(°) |
|-----|-------|-----|------|--------|-------|-------------|----------|
| 3   | M     | 232 | HIS  | O-C-N  | -6.06 | 113.00      | 122.70   |
| 2   | B     | 451 | MET  | O-C-N  | 6.06  | 132.40      | 122.70   |
| 2   | B     | 466 | SER  | O-C-N  | 6.06  | 132.40      | 122.70   |
| 2   | B     | 216 | LYS  | O-C-N  | -6.06 | 113.01      | 122.70   |
| 2   | B     | 522 | GLU  | O-C-N  | 6.06  | 132.39      | 122.70   |
| 2   | B     | 103 | LEU  | O-C-N  | 6.06  | 132.39      | 122.70   |
| 4   | S     | 139 | GLY  | N-CA-C | -6.05 | 97.96       | 113.10   |
| 1   | A     | 211 | ASP  | O-C-N  | 6.05  | 132.38      | 122.70   |
| 1   | A     | 400 | VAL  | O-C-N  | 6.05  | 132.38      | 122.70   |
| 3   | M     | 429 | ASP  | C-N-CA | -6.05 | 106.58      | 121.70   |
| 1   | A     | 465 | SER  | CA-C-O | 6.05  | 132.80      | 120.10   |
| 1   | A     | 142 | LYS  | O-C-N  | 6.05  | 132.38      | 122.70   |
| 1   | A     | 278 | ILE  | CA-C-O | -6.05 | 107.40      | 120.10   |
| 1   | A     | 566 | PHE  | C-N-CA | 6.05  | 136.82      | 121.70   |
| 2   | B     | 596 | LEU  | O-C-N  | 6.05  | 132.38      | 122.70   |
| 2   | B     | 579 | PRO  | N-CA-C | 6.04  | 127.82      | 112.10   |
| 4   | S     | 16  | LEU  | CA-C-O | 6.04  | 132.79      | 120.10   |
| 1   | A     | 369 | SER  | O-C-N  | 6.04  | 132.36      | 122.70   |
| 4   | S     | 150 | VAL  | CA-C-O | -6.04 | 107.42      | 120.10   |
| 2   | B     | 435 | SER  | O-C-N  | 6.04  | 132.36      | 122.70   |
| 1   | A     | 107 | TYR  | CA-C-O | -6.04 | 107.43      | 120.10   |
| 2   | B     | 101 | ILE  | O-C-N  | 6.04  | 132.35      | 122.70   |
| 1   | A     | 339 | TYR  | O-C-N  | 6.03  | 132.35      | 122.70   |
| 1   | A     | 389 | GLN  | O-C-N  | 6.03  | 132.35      | 122.70   |
| 3   | M     | 90  | PHE  | O-C-N  | 6.03  | 132.35      | 122.70   |
| 1   | A     | 158 | LEU  | CA-C-O | -6.03 | 107.43      | 120.10   |
| 1   | A     | 372 | ILE  | O-C-N  | 6.03  | 132.35      | 122.70   |
| 1   | A     | 163 | ALA  | O-C-N  | -6.03 | 113.06      | 122.70   |
| 1   | A     | 258 | LYS  | O-C-N  | 6.03  | 132.35      | 122.70   |
| 1   | A     | 631 | SER  | CA-C-O | -6.03 | 107.44      | 120.10   |
| 2   | B     | 525 | ILE  | O-C-N  | 6.03  | 132.34      | 122.70   |
| 3   | M     | 283 | PHE  | N-CA-C | -6.03 | 94.73       | 111.00   |
| 1   | A     | 518 | CYS  | CA-C-O | -6.02 | 107.45      | 120.10   |
| 2   | B     | 511 | ILE  | CA-C-O | 6.02  | 132.75      | 120.10   |
| 1   | A     | 325 | SER  | CA-C-N | -6.02 | 103.96      | 117.20   |
| 1   | A     | 620 | GLY  | CA-C-O | -6.02 | 109.77      | 120.60   |
| 2   | B     | 64  | LYS  | O-C-N  | 6.02  | 132.33      | 122.70   |
| 2   | B     | 543 | GLU  | O-C-N  | 6.02  | 132.33      | 122.70   |
| 2   | B     | 590 | GLN  | O-C-N  | 6.02  | 132.33      | 122.70   |
| 4   | S     | 151 | ALA  | O-C-N  | 6.01  | 132.32      | 122.70   |
| 1   | A     | 436 | CYS  | C-N-CA | -6.01 | 106.67      | 121.70   |
| 2   | B     | 450 | VAL  | O-C-N  | 6.01  | 132.32      | 122.70   |

*Continued on next page...*

*Continued from previous page...*

| Mol | Chain | Res | Type | Atoms   | Z     | Observed(°) | Ideal(°) |
|-----|-------|-----|------|---------|-------|-------------|----------|
| 1   | A     | 312 | ALA  | O-C-N   | 6.01  | 132.31      | 122.70   |
| 3   | M     | 120 | ARG  | O-C-N   | 6.01  | 132.31      | 122.70   |
| 2   | B     | 320 | SER  | O-C-N   | 6.01  | 132.31      | 122.70   |
| 2   | B     | 145 | MET  | CA-C-N  | 6.00  | 130.41      | 117.20   |
| 2   | B     | 446 | TRP  | O-C-N   | 6.00  | 132.31      | 122.70   |
| 3   | M     | 367 | ALA  | N-CA-CB | -6.00 | 101.70      | 110.10   |
| 1   | A     | 140 | VAL  | C-N-CA  | -6.00 | 106.70      | 121.70   |
| 2   | B     | 74  | ASP  | C-N-CA  | 6.00  | 136.70      | 121.70   |
| 2   | B     | 510 | GLY  | O-C-N   | 6.00  | 132.30      | 122.70   |
| 1   | A     | 493 | ALA  | O-C-N   | 6.00  | 132.29      | 122.70   |
| 2   | B     | 238 | LYS  | C-N-CA  | 5.99  | 136.68      | 121.70   |
| 2   | B     | 232 | ARG  | O-C-N   | 5.99  | 132.29      | 122.70   |
| 2   | B     | 529 | VAL  | O-C-N   | 5.99  | 132.29      | 122.70   |
| 1   | A     | 129 | LYS  | O-C-N   | 5.98  | 132.27      | 122.70   |
| 3   | M     | 130 | GLU  | N-CA-C  | -5.98 | 94.84       | 111.00   |
| 4   | S     | 43  | ASN  | C-N-CA  | -5.98 | 106.74      | 121.70   |
| 1   | A     | 576 | MET  | O-C-N   | 5.98  | 132.27      | 122.70   |
| 2   | B     | 469 | ASP  | CA-C-O  | -5.98 | 107.55      | 120.10   |
| 1   | A     | 71  | VAL  | CA-C-O  | -5.98 | 107.55      | 120.10   |
| 2   | B     | 207 | VAL  | O-C-N   | 5.98  | 132.26      | 122.70   |
| 1   | A     | 229 | ASN  | C-N-CD  | 5.97  | 140.94      | 128.40   |
| 1   | A     | 577 | VAL  | O-C-N   | 5.97  | 132.25      | 122.70   |
| 1   | A     | 121 | LEU  | O-C-N   | 5.97  | 132.25      | 122.70   |
| 2   | B     | 569 | THR  | CA-C-N  | -5.97 | 104.26      | 116.20   |
| 1   | A     | 104 | ARG  | O-C-N   | 5.96  | 132.24      | 122.70   |
| 1   | A     | 296 | ASN  | CA-C-O  | -5.96 | 107.57      | 120.10   |
| 3   | M     | 121 | ILE  | O-C-N   | 5.96  | 132.24      | 122.70   |
| 1   | A     | 633 | PHE  | O-C-N   | 5.96  | 132.24      | 122.70   |
| 2   | B     | 55  | ASN  | O-C-N   | 5.96  | 132.24      | 122.70   |
| 2   | B     | 112 | ASP  | N-CA-C  | 5.96  | 127.09      | 111.00   |
| 2   | B     | 225 | LEU  | CA-C-N  | -5.96 | 104.08      | 117.20   |
| 1   | A     | 130 | LYS  | O-C-N   | 5.96  | 132.23      | 122.70   |
| 1   | A     | 553 | LEU  | O-C-N   | 5.96  | 132.23      | 122.70   |
| 1   | A     | 108 | LEU  | O-C-N   | 5.96  | 132.23      | 122.70   |
| 2   | B     | 471 | TYR  | O-C-N   | 5.96  | 132.23      | 122.70   |
| 1   | A     | 486 | SER  | N-CA-C  | -5.95 | 94.92       | 111.00   |
| 2   | B     | 322 | CYS  | O-C-N   | 5.95  | 132.22      | 122.70   |
| 1   | A     | 490 | VAL  | O-C-N   | 5.95  | 132.22      | 122.70   |
| 2   | B     | 585 | GLY  | CA-C-O  | -5.95 | 109.89      | 120.60   |
| 1   | A     | 237 | SER  | CA-C-O  | -5.95 | 107.61      | 120.10   |
| 1   | A     | 425 | LYS  | O-C-N   | 5.95  | 132.22      | 122.70   |
| 1   | A     | 491 | THR  | O-C-N   | 5.95  | 132.22      | 122.70   |

*Continued on next page...*

*Continued from previous page...*

| Mol | Chain | Res | Type | Atoms  | Z     | Observed(°) | Ideal(°) |
|-----|-------|-----|------|--------|-------|-------------|----------|
| 2   | B     | 96  | LYS  | O-C-N  | 5.95  | 132.22      | 122.70   |
| 1   | A     | 513 | ARG  | O-C-N  | 5.95  | 132.22      | 122.70   |
| 1   | A     | 538 | GLU  | C-N-CA | -5.95 | 106.83      | 121.70   |
| 2   | B     | 333 | GLN  | N-CA-C | -5.95 | 94.95       | 111.00   |
| 1   | A     | 214 | VAL  | O-C-N  | 5.94  | 132.21      | 122.70   |
| 2   | B     | 553 | ALA  | O-C-N  | 5.94  | 132.21      | 122.70   |
| 4   | S     | 85  | PHE  | O-C-N  | -5.94 | 113.19      | 122.70   |
| 2   | B     | 358 | MET  | O-C-N  | 5.94  | 132.20      | 122.70   |
| 1   | A     | 165 | ASP  | O-C-N  | 5.93  | 132.19      | 122.70   |
| 2   | B     | 314 | ASN  | O-C-N  | 5.93  | 132.38      | 121.10   |
| 2   | B     | 131 | ASN  | O-C-N  | 5.93  | 132.19      | 122.70   |
| 1   | A     | 528 | ASN  | O-C-N  | -5.93 | 113.12      | 123.20   |
| 1   | A     | 625 | LEU  | C-N-CA | -5.93 | 106.88      | 121.70   |
| 1   | A     | 154 | ILE  | C-N-CA | -5.92 | 106.90      | 121.70   |
| 2   | B     | 530 | LEU  | O-C-N  | 5.92  | 132.17      | 122.70   |
| 2   | B     | 567 | GLN  | C-N-CA | -5.92 | 106.91      | 121.70   |
| 2   | B     | 469 | ASP  | O-C-N  | 5.91  | 132.16      | 122.70   |
| 1   | A     | 98  | ASN  | O-C-N  | -5.91 | 113.24      | 122.70   |
| 3   | M     | 426 | LYS  | N-CA-C | -5.91 | 95.04       | 111.00   |
| 1   | A     | 458 | ALA  | O-C-N  | 5.90  | 132.15      | 122.70   |
| 1   | A     | 230 | PRO  | CA-C-O | -5.90 | 106.03      | 120.20   |
| 2   | B     | 396 | ILE  | O-C-N  | 5.90  | 132.14      | 122.70   |
| 4   | S     | 159 | ALA  | O-C-N  | 5.90  | 132.13      | 122.70   |
| 1   | A     | 588 | LEU  | CA-C-O | 5.89  | 132.47      | 120.10   |
| 2   | B     | 371 | GLN  | O-C-N  | 5.89  | 132.12      | 122.70   |
| 2   | B     | 476 | ARG  | O-C-N  | 5.89  | 132.12      | 122.70   |
| 2   | B     | 604 | GLU  | CA-C-N | -5.89 | 104.25      | 117.20   |
| 1   | A     | 499 | ILE  | C-N-CA | -5.88 | 106.99      | 121.70   |
| 2   | B     | 418 | TYR  | O-C-N  | -5.88 | 113.29      | 122.70   |
| 2   | B     | 413 | LYS  | O-C-N  | 5.88  | 132.11      | 122.70   |
| 3   | M     | 261 | ASN  | C-N-CA | -5.88 | 107.00      | 121.70   |
| 1   | A     | 110 | ALA  | O-C-N  | -5.88 | 113.30      | 122.70   |
| 1   | A     | 257 | LEU  | CA-C-O | -5.88 | 107.75      | 120.10   |
| 1   | A     | 371 | ALA  | O-C-N  | 5.88  | 132.10      | 122.70   |
| 1   | A     | 609 | LEU  | O-C-N  | 5.88  | 132.10      | 122.70   |
| 2   | B     | 247 | TYR  | O-C-N  | 5.88  | 132.10      | 122.70   |
| 1   | A     | 575 | LYS  | O-C-N  | 5.87  | 132.10      | 122.70   |
| 2   | B     | 526 | CYS  | CA-C-O | -5.87 | 107.77      | 120.10   |
| 3   | M     | 265 | ASN  | CA-C-O | -5.87 | 107.77      | 120.10   |
| 1   | A     | 217 | ALA  | O-C-N  | 5.86  | 132.08      | 122.70   |
| 2   | B     | 33  | SER  | O-C-N  | 5.86  | 132.08      | 122.70   |
| 1   | A     | 600 | SER  | CA-C-O | -5.86 | 107.79      | 120.10   |

*Continued on next page...*

*Continued from previous page...*

| Mol | Chain | Res | Type | Atoms  | Z     | Observed(°) | Ideal(°) |
|-----|-------|-----|------|--------|-------|-------------|----------|
| 2   | B     | 449 | HIS  | O-C-N  | 5.86  | 132.07      | 122.70   |
| 1   | A     | 276 | PRO  | O-C-N  | -5.86 | 113.33      | 122.70   |
| 2   | B     | 48  | VAL  | O-C-N  | 5.86  | 132.07      | 122.70   |
| 1   | A     | 512 | LEU  | O-C-N  | 5.85  | 132.07      | 122.70   |
| 2   | B     | 523 | PHE  | C-N-CA | -5.85 | 107.07      | 121.70   |
| 2   | B     | 43  | ASN  | CA-C-O | -5.85 | 107.82      | 120.10   |
| 3   | M     | 256 | VAL  | O-C-N  | 5.84  | 132.05      | 122.70   |
| 2   | B     | 245 | GLN  | O-C-N  | 5.83  | 132.04      | 122.70   |
| 4   | S     | 98  | ILE  | CA-C-O | -5.83 | 107.86      | 120.10   |
| 2   | B     | 60  | ARG  | O-C-N  | 5.82  | 132.02      | 122.70   |
| 1   | A     | 122 | MET  | O-C-N  | 5.82  | 132.01      | 122.70   |
| 2   | B     | 212 | VAL  | C-N-CA | -5.82 | 107.15      | 121.70   |
| 2   | B     | 366 | LEU  | CA-C-O | 5.82  | 132.33      | 120.10   |
| 1   | A     | 494 | ASN  | O-C-N  | 5.82  | 132.01      | 122.70   |
| 1   | A     | 603 | VAL  | CA-C-O | -5.82 | 107.88      | 120.10   |
| 4   | S     | 1   | MET  | CA-C-O | 5.82  | 132.32      | 120.10   |
| 1   | A     | 317 | GLU  | O-C-N  | 5.81  | 132.00      | 122.70   |
| 2   | B     | 176 | ALA  | O-C-N  | 5.81  | 132.00      | 122.70   |
| 2   | B     | 355 | ASN  | CA-C-O | -5.81 | 107.89      | 120.10   |
| 1   | A     | 514 | GLU  | O-C-N  | 5.81  | 132.00      | 122.70   |
| 2   | B     | 194 | ASP  | O-C-N  | 5.80  | 131.99      | 122.70   |
| 2   | B     | 444 | THR  | CA-C-O | 5.80  | 132.29      | 120.10   |
| 2   | B     | 490 | ILE  | CA-C-O | -5.80 | 107.92      | 120.10   |
| 2   | B     | 551 | LEU  | O-C-N  | 5.80  | 131.98      | 122.70   |
| 2   | B     | 555 | LEU  | CA-C-O | -5.80 | 107.92      | 120.10   |
| 2   | B     | 303 | LEU  | CA-C-O | -5.80 | 107.93      | 120.10   |
| 4   | S     | 32  | LEU  | CA-C-O | -5.79 | 107.93      | 120.10   |
| 1   | A     | 549 | GLU  | O-C-N  | 5.79  | 131.96      | 122.70   |
| 1   | A     | 64  | LEU  | C-N-CA | -5.79 | 107.23      | 121.70   |
| 3   | M     | 306 | LEU  | C-N-CA | -5.79 | 107.23      | 121.70   |
| 1   | A     | 545 | HIS  | CA-C-O | 5.79  | 132.25      | 120.10   |
| 1   | A     | 417 | PRO  | N-CA-C | -5.78 | 97.06       | 112.10   |
| 2   | B     | 133 | GLU  | O-C-N  | 5.78  | 131.95      | 122.70   |
| 2   | B     | 189 | HIS  | O-C-N  | 5.78  | 131.95      | 122.70   |
| 1   | A     | 294 | SER  | O-C-N  | 5.78  | 131.95      | 122.70   |
| 2   | B     | 492 | LYS  | O-C-N  | 5.78  | 131.94      | 122.70   |
| 2   | B     | 586 | SER  | O-C-N  | 5.78  | 131.95      | 122.70   |
| 2   | B     | 402 | LEU  | N-CA-C | 5.77  | 126.58      | 111.00   |
| 1   | A     | 356 | ILE  | O-C-N  | 5.77  | 131.93      | 122.70   |
| 2   | B     | 79  | VAL  | O-C-N  | 5.77  | 131.93      | 122.70   |
| 2   | B     | 412 | PHE  | CA-C-O | -5.77 | 107.98      | 120.10   |
| 1   | A     | 152 | THR  | C-N-CA | -5.77 | 107.28      | 121.70   |

*Continued on next page...*

*Continued from previous page...*

| Mol | Chain | Res | Type | Atoms  | Z     | Observed(°) | Ideal(°) |
|-----|-------|-----|------|--------|-------|-------------|----------|
| 2   | B     | 495 | ASP  | O-C-N  | 5.77  | 131.93      | 122.70   |
| 1   | A     | 268 | PRO  | O-C-N  | 5.76  | 131.92      | 122.70   |
| 3   | M     | 421 | GLY  | CA-C-O | 5.76  | 130.97      | 120.60   |
| 1   | A     | 275 | LEU  | O-C-N  | -5.75 | 110.17      | 121.10   |
| 2   | B     | 457 | HIS  | O-C-N  | -5.75 | 113.50      | 122.70   |
| 1   | A     | 350 | SER  | C-N-CA | -5.75 | 107.32      | 121.70   |
| 2   | B     | 86  | VAL  | O-C-N  | 5.75  | 131.90      | 122.70   |
| 3   | M     | 225 | VAL  | O-C-N  | 5.75  | 131.90      | 122.70   |
| 1   | A     | 582 | ILE  | CA-C-O | -5.75 | 108.03      | 120.10   |
| 2   | B     | 394 | TRP  | O-C-N  | 5.75  | 131.89      | 122.70   |
| 3   | M     | 292 | PRO  | C-N-CD | -5.74 | 107.97      | 120.60   |
| 2   | B     | 99  | ARG  | CA-C-O | -5.74 | 108.04      | 120.10   |
| 2   | B     | 120 | ILE  | CA-C-O | -5.74 | 108.05      | 120.10   |
| 2   | B     | 532 | ARG  | O-C-N  | 5.74  | 131.88      | 122.70   |
| 1   | A     | 430 | ASN  | O-C-N  | 5.74  | 131.88      | 122.70   |
| 1   | A     | 109 | ALA  | O-C-N  | 5.74  | 131.88      | 122.70   |
| 1   | A     | 217 | ALA  | CA-C-O | -5.74 | 108.06      | 120.10   |
| 4   | S     | 96  | LEU  | CA-C-O | -5.73 | 108.06      | 120.10   |
| 1   | A     | 173 | THR  | C-N-CA | 5.73  | 136.02      | 121.70   |
| 2   | B     | 423 | HIS  | N-CA-C | -5.73 | 95.54       | 111.00   |
| 1   | A     | 543 | TYR  | N-CA-C | 5.73  | 126.46      | 111.00   |
| 1   | A     | 126 | ASN  | O-C-N  | 5.72  | 131.85      | 122.70   |
| 2   | B     | 241 | ASP  | O-C-N  | 5.72  | 131.84      | 122.70   |
| 3   | M     | 85  | GLY  | CA-C-O | -5.72 | 110.31      | 120.60   |
| 3   | M     | 447 | ILE  | CA-C-O | 5.72  | 132.10      | 120.10   |
| 1   | A     | 413 | SER  | C-N-CA | -5.71 | 107.41      | 121.70   |
| 2   | B     | 174 | ALA  | CA-C-O | 5.71  | 132.10      | 120.10   |
| 2   | B     | 204 | ASP  | CA-C-O | -5.71 | 108.10      | 120.10   |
| 2   | B     | 122 | SER  | O-C-N  | 5.71  | 131.84      | 122.70   |
| 1   | A     | 422 | GLU  | CA-C-O | -5.71 | 108.11      | 120.10   |
| 2   | B     | 434 | LYS  | O-C-N  | 5.71  | 131.83      | 122.70   |
| 4   | S     | 152 | SER  | O-C-N  | 5.70  | 131.83      | 122.70   |
| 2   | B     | 393 | ILE  | O-C-N  | 5.70  | 131.82      | 122.70   |
| 4   | S     | 74  | GLN  | CA-C-O | 5.70  | 132.07      | 120.10   |
| 1   | A     | 123 | LEU  | O-C-N  | 5.70  | 131.81      | 122.70   |
| 1   | A     | 108 | LEU  | CA-C-O | -5.69 | 108.14      | 120.10   |
| 2   | B     | 318 | ILE  | CA-C-O | -5.69 | 108.15      | 120.10   |
| 2   | B     | 341 | GLU  | CA-C-O | -5.69 | 108.15      | 120.10   |
| 2   | B     | 392 | SER  | O-C-N  | 5.69  | 131.81      | 122.70   |
| 2   | B     | 265 | VAL  | CA-C-N | -5.69 | 104.68      | 117.20   |
| 4   | S     | 164 | ASP  | O-C-N  | -5.69 | 113.60      | 122.70   |
| 1   | A     | 325 | SER  | C-N-CA | 5.69  | 135.92      | 121.70   |

*Continued on next page...*

*Continued from previous page...*

| Mol | Chain | Res | Type | Atoms  | Z     | Observed(°) | Ideal(°) |
|-----|-------|-----|------|--------|-------|-------------|----------|
| 2   | B     | 300 | ASP  | O-C-N  | 5.69  | 131.80      | 122.70   |
| 2   | B     | 593 | ASN  | CA-C-O | -5.69 | 108.16      | 120.10   |
| 1   | A     | 75  | THR  | O-C-N  | 5.69  | 131.80      | 122.70   |
| 2   | B     | 211 | ALA  | CA-C-O | -5.68 | 108.17      | 120.10   |
| 4   | S     | 158 | LYS  | CA-C-O | -5.68 | 108.17      | 120.10   |
| 2   | B     | 173 | VAL  | O-C-N  | 5.68  | 131.79      | 122.70   |
| 1   | A     | 106 | GLY  | CA-C-O | -5.68 | 110.38      | 120.60   |
| 1   | A     | 491 | THR  | CA-C-O | -5.68 | 108.18      | 120.10   |
| 1   | A     | 558 | VAL  | CA-C-O | -5.67 | 108.18      | 120.10   |
| 1   | A     | 514 | GLU  | CA-C-O | -5.67 | 108.19      | 120.10   |
| 2   | B     | 438 | ARG  | O-C-N  | 5.67  | 131.78      | 122.70   |
| 2   | B     | 436 | LEU  | CA-C-O | -5.67 | 108.19      | 120.10   |
| 3   | M     | 88  | ASP  | O-C-N  | 5.67  | 131.77      | 122.70   |
| 1   | A     | 456 | ASP  | O-C-N  | 5.67  | 131.77      | 122.70   |
| 2   | B     | 448 | SER  | O-C-N  | 5.67  | 131.77      | 122.70   |
| 2   | B     | 322 | CYS  | CA-C-O | -5.67 | 108.20      | 120.10   |
| 3   | M     | 306 | LEU  | CA-C-O | 5.67  | 132.00      | 120.10   |
| 1   | A     | 155 | THR  | O-C-N  | 5.67  | 131.86      | 121.10   |
| 2   | B     | 22  | ALA  | N-CA-C | -5.67 | 95.70       | 111.00   |
| 4   | S     | 84  | TYR  | CA-C-O | 5.67  | 132.00      | 120.10   |
| 1   | A     | 478 | ARG  | O-C-N  | 5.66  | 131.76      | 122.70   |
| 3   | M     | 237 | THR  | O-C-N  | -5.66 | 113.58      | 123.20   |
| 3   | M     | 398 | ILE  | O-C-N  | -5.66 | 113.64      | 122.70   |
| 1   | A     | 293 | GLU  | O-C-N  | 5.66  | 131.75      | 122.70   |
| 2   | B     | 545 | ARG  | O-C-N  | 5.66  | 131.75      | 122.70   |
| 2   | B     | 318 | ILE  | O-C-N  | 5.66  | 131.75      | 122.70   |
| 3   | M     | 396 | GLN  | O-C-N  | -5.66 | 113.65      | 122.70   |
| 1   | A     | 253 | ILE  | O-C-N  | 5.65  | 131.75      | 122.70   |
| 2   | B     | 189 | HIS  | CA-C-O | -5.65 | 108.23      | 120.10   |
| 1   | A     | 452 | ALA  | O-C-N  | 5.65  | 131.74      | 122.70   |
| 2   | B     | 383 | VAL  | CA-C-N | -5.65 | 104.77      | 117.20   |
| 2   | B     | 456 | ASP  | O-C-N  | 5.65  | 131.74      | 122.70   |
| 3   | M     | 284 | SER  | C-N-CD | 5.65  | 140.27      | 128.40   |
| 4   | S     | 154 | ASP  | O-C-N  | 5.65  | 131.74      | 122.70   |
| 1   | A     | 448 | GLU  | C-N-CA | 5.65  | 135.82      | 121.70   |
| 1   | A     | 479 | ASN  | O-C-N  | 5.65  | 131.74      | 122.70   |
| 1   | A     | 572 | PHE  | C-N-CA | 5.65  | 135.82      | 121.70   |
| 4   | S     | 137 | GLN  | CA-C-O | 5.65  | 131.96      | 120.10   |
| 3   | M     | 87  | LEU  | O-C-N  | 5.64  | 131.73      | 122.70   |
| 2   | B     | 274 | PRO  | N-CA-C | -5.64 | 97.43       | 112.10   |
| 2   | B     | 391 | ALA  | O-C-N  | 5.64  | 131.73      | 122.70   |
| 1   | A     | 233 | PHE  | CA-C-O | 5.64  | 131.95      | 120.10   |

*Continued on next page...*



*Continued from previous page...*

| Mol | Chain | Res | Type | Atoms   | Z     | Observed(°) | Ideal(°) |
|-----|-------|-----|------|---------|-------|-------------|----------|
| 3   | M     | 421 | GLY  | C-N-CD  | 5.64  | 140.25      | 128.40   |
| 1   | A     | 230 | PRO  | CA-N-CD | 5.63  | 119.59      | 111.70   |
| 2   | B     | 239 | GLN  | C-N-CA  | 5.63  | 135.78      | 121.70   |
| 1   | A     | 88  | ASN  | O-C-N   | -5.63 | 113.69      | 122.70   |
| 3   | M     | 385 | ARG  | CA-C-O  | 5.63  | 131.93      | 120.10   |
| 1   | A     | 241 | TYR  | O-C-N   | 5.63  | 131.71      | 122.70   |
| 2   | B     | 407 | ASN  | O-C-N   | 5.63  | 131.71      | 122.70   |
| 3   | M     | 230 | LYS  | O-C-N   | -5.63 | 113.70      | 122.70   |
| 2   | B     | 472 | VAL  | C-N-CA  | -5.62 | 107.64      | 121.70   |
| 2   | B     | 172 | GLU  | C-N-CA  | -5.62 | 107.64      | 121.70   |
| 1   | A     | 224 | GLU  | C-N-CA  | -5.62 | 107.65      | 121.70   |
| 1   | A     | 145 | ILE  | CA-C-O  | -5.62 | 108.30      | 120.10   |
| 1   | A     | 265 | GLN  | C-N-CA  | 5.62  | 135.75      | 121.70   |
| 2   | B     | 117 | LEU  | O-C-N   | 5.62  | 131.69      | 122.70   |
| 3   | M     | 444 | ALA  | N-CA-CB | -5.62 | 102.24      | 110.10   |
| 1   | A     | 575 | LYS  | CA-C-O  | -5.60 | 108.33      | 120.10   |
| 2   | B     | 303 | LEU  | O-C-N   | 5.60  | 131.66      | 122.70   |
| 1   | A     | 90  | HIS  | O-C-N   | 5.59  | 131.65      | 122.70   |
| 1   | A     | 551 | LEU  | CA-C-O  | -5.59 | 108.35      | 120.10   |
| 1   | A     | 387 | ILE  | CA-C-O  | -5.59 | 108.36      | 120.10   |
| 4   | S     | 34  | GLN  | O-C-N   | 5.59  | 131.65      | 122.70   |
| 2   | B     | 426 | GLU  | O-C-N   | 5.59  | 131.64      | 122.70   |
| 2   | B     | 215 | TYR  | CA-C-O  | -5.58 | 108.37      | 120.10   |
| 2   | B     | 496 | LEU  | O-C-N   | 5.58  | 131.64      | 122.70   |
| 1   | A     | 139 | ASP  | CA-C-O  | -5.58 | 108.38      | 120.10   |
| 1   | A     | 630 | PRO  | O-C-N   | 5.58  | 131.63      | 122.70   |
| 1   | A     | 184 | ALA  | O-C-N   | 5.58  | 131.62      | 122.70   |
| 2   | B     | 138 | ALA  | CA-C-O  | -5.58 | 108.38      | 120.10   |
| 2   | B     | 302 | PHE  | CA-C-O  | -5.58 | 108.39      | 120.10   |
| 2   | B     | 387 | ASP  | N-CA-C  | 5.58  | 126.06      | 111.00   |
| 3   | M     | 384 | GLY  | O-C-N   | 5.57  | 131.62      | 122.70   |
| 2   | B     | 155 | LEU  | CA-C-O  | -5.57 | 108.41      | 120.10   |
| 1   | A     | 334 | SER  | O-C-N   | 5.57  | 131.61      | 122.70   |
| 2   | B     | 605 | PHE  | CA-C-O  | -5.57 | 108.41      | 120.10   |
| 1   | A     | 380 | ASP  | O-C-N   | 5.56  | 131.60      | 122.70   |
| 1   | A     | 635 | ALA  | CA-C-O  | -5.56 | 108.42      | 120.10   |
| 3   | M     | 368 | ASP  | O-C-N   | 5.56  | 131.67      | 121.10   |
| 1   | A     | 489 | GLU  | O-C-N   | 5.56  | 131.59      | 122.70   |
| 1   | A     | 135 | ASP  | CA-C-N  | 5.55  | 127.31      | 116.20   |
| 1   | A     | 137 | ASN  | C-N-CA  | -5.55 | 107.81      | 121.70   |
| 1   | A     | 319 | LEU  | CA-C-O  | 5.55  | 131.76      | 120.10   |
| 1   | A     | 177 | ILE  | CA-C-O  | -5.55 | 108.44      | 120.10   |

*Continued on next page...*

*Continued from previous page...*

| Mol | Chain | Res | Type | Atoms   | Z     | Observed(°) | Ideal(°) |
|-----|-------|-----|------|---------|-------|-------------|----------|
| 1   | A     | 352 | PHE  | O-C-N   | 5.55  | 131.58      | 122.70   |
| 2   | B     | 493 | LEU  | CA-C-O  | -5.55 | 108.45      | 120.10   |
| 2   | B     | 540 | GLU  | N-CA-C  | 5.55  | 125.98      | 111.00   |
| 1   | A     | 193 | PRO  | CA-C-O  | -5.54 | 106.89      | 120.20   |
| 2   | B     | 569 | THR  | C-N-CA  | 5.54  | 133.94      | 122.30   |
| 1   | A     | 222 | ILE  | O-C-N   | 5.54  | 131.57      | 122.70   |
| 1   | A     | 156 | PRO  | CA-C-O  | 5.54  | 133.49      | 120.20   |
| 3   | M     | 387 | GLU  | O-C-N   | -5.54 | 113.84      | 122.70   |
| 4   | S     | 86  | THR  | O-C-N   | -5.54 | 113.84      | 122.70   |
| 1   | A     | 578 | LEU  | CA-C-O  | -5.54 | 108.47      | 120.10   |
| 1   | A     | 416 | ILE  | C-N-CA  | -5.53 | 98.76       | 122.00   |
| 2   | B     | 415 | LEU  | CA-C-O  | -5.53 | 108.48      | 120.10   |
| 4   | S     | 109 | LEU  | C-N-CA  | -5.53 | 107.87      | 121.70   |
| 2   | B     | 522 | GLU  | N-CA-C  | 5.53  | 125.93      | 111.00   |
| 1   | A     | 216 | SER  | O-C-N   | 5.53  | 131.54      | 122.70   |
| 1   | A     | 254 | ILE  | O-C-N   | 5.53  | 131.54      | 122.70   |
| 3   | M     | 46  | SER  | O-C-N   | -5.53 | 113.86      | 122.70   |
| 2   | B     | 477 | MET  | O-C-N   | 5.53  | 131.54      | 122.70   |
| 4   | S     | 87  | PHE  | O-C-N   | -5.53 | 113.86      | 122.70   |
| 1   | A     | 80  | TYR  | CB-CA-C | 5.52  | 121.45      | 110.40   |
| 1   | A     | 487 | MET  | C-N-CA  | -5.52 | 107.89      | 121.70   |
| 1   | A     | 513 | ARG  | CA-C-O  | -5.52 | 108.50      | 120.10   |
| 4   | S     | 87  | PHE  | CA-C-O  | 5.52  | 131.70      | 120.10   |
| 1   | A     | 583 | GLU  | O-C-N   | 5.52  | 131.53      | 122.70   |
| 1   | A     | 72  | LEU  | O-C-N   | 5.52  | 131.53      | 122.70   |
| 1   | A     | 341 | ILE  | O-C-N   | 5.52  | 132.58      | 123.20   |
| 1   | A     | 251 | TRP  | O-C-N   | 5.52  | 131.53      | 122.70   |
| 2   | B     | 457 | HIS  | C-N-CA  | -5.51 | 107.91      | 121.70   |
| 1   | A     | 333 | ILE  | CA-C-O  | -5.51 | 108.52      | 120.10   |
| 1   | A     | 419 | ILE  | CA-C-N  | -5.51 | 105.07      | 117.20   |
| 1   | A     | 229 | ASN  | C-N-CA  | -5.51 | 98.87       | 122.00   |
| 2   | B     | 73  | ASP  | C-N-CA  | -5.51 | 107.94      | 121.70   |
| 1   | A     | 501 | ASN  | C-N-CA  | 5.50  | 135.46      | 121.70   |
| 2   | B     | 156 | HIS  | O-C-N   | 5.50  | 131.51      | 122.70   |
| 2   | B     | 68  | SER  | O-C-N   | 5.50  | 131.51      | 122.70   |
| 1   | A     | 265 | GLN  | CB-CA-C | 5.50  | 121.40      | 110.40   |
| 1   | A     | 63  | ASP  | N-CA-C  | 5.50  | 125.85      | 111.00   |
| 1   | A     | 426 | ILE  | O-C-N   | 5.50  | 131.50      | 122.70   |
| 2   | B     | 340 | ILE  | O-C-N   | 5.49  | 131.49      | 122.70   |
| 3   | M     | 117 | ASN  | O-C-N   | 5.49  | 131.49      | 122.70   |
| 4   | S     | 131 | VAL  | O-C-N   | 5.49  | 131.49      | 122.70   |
| 1   | A     | 292 | TYR  | O-C-N   | 5.49  | 131.49      | 122.70   |

*Continued on next page...*

*Continued from previous page...*

| Mol | Chain | Res | Type | Atoms   | Z     | Observed(°) | Ideal(°) |
|-----|-------|-----|------|---------|-------|-------------|----------|
| 2   | B     | 290 | SER  | N-CA-C  | 5.49  | 125.81      | 111.00   |
| 2   | B     | 345 | ARG  | O-C-N   | 5.48  | 131.47      | 122.70   |
| 1   | A     | 191 | GLN  | C-N-CA  | 5.48  | 135.40      | 121.70   |
| 1   | A     | 333 | ILE  | O-C-N   | 5.48  | 131.47      | 122.70   |
| 1   | A     | 580 | GLU  | O-C-N   | 5.48  | 131.47      | 122.70   |
| 2   | B     | 245 | GLN  | CA-C-O  | -5.48 | 108.59      | 120.10   |
| 2   | B     | 458 | MET  | C-N-CA  | -5.48 | 108.00      | 121.70   |
| 4   | S     | 78  | LYS  | CA-C-O  | 5.48  | 131.61      | 120.10   |
| 2   | B     | 36  | THR  | CA-C-O  | -5.48 | 108.59      | 120.10   |
| 1   | A     | 188 | VAL  | CA-C-O  | -5.48 | 108.60      | 120.10   |
| 2   | B     | 547 | GLN  | O-C-N   | 5.48  | 131.46      | 122.70   |
| 3   | M     | 74  | TYR  | CA-C-N  | -5.48 | 105.15      | 117.20   |
| 1   | A     | 441 | TYR  | N-CA-C  | -5.47 | 96.22       | 111.00   |
| 2   | B     | 109 | ALA  | CB-CA-C | -5.47 | 101.89      | 110.10   |
| 2   | B     | 531 | ARG  | CA-C-O  | -5.47 | 108.61      | 120.10   |
| 4   | S     | 138 | GLY  | C-N-CA  | 5.47  | 133.78      | 122.30   |
| 3   | M     | 296 | LYS  | C-N-CA  | -5.47 | 108.03      | 121.70   |
| 2   | B     | 475 | ILE  | CA-C-O  | -5.47 | 108.62      | 120.10   |
| 2   | B     | 431 | MET  | O-C-N   | 5.46  | 131.44      | 122.70   |
| 2   | B     | 126 | SER  | CA-C-O  | 5.46  | 131.57      | 120.10   |
| 2   | B     | 365 | PHE  | O-C-N   | 5.46  | 131.43      | 122.70   |
| 2   | B     | 36  | THR  | O-C-N   | 5.45  | 131.42      | 122.70   |
| 3   | M     | 267 | ILE  | C-N-CA  | -5.45 | 110.86      | 122.30   |
| 1   | A     | 175 | PRO  | O-C-N   | 5.45  | 131.41      | 122.70   |
| 2   | B     | 491 | PHE  | O-C-N   | 5.45  | 131.41      | 122.70   |
| 2   | B     | 127 | LEU  | C-N-CA  | -5.44 | 108.09      | 121.70   |
| 1   | A     | 106 | GLY  | O-C-N   | 5.44  | 131.41      | 122.70   |
| 1   | A     | 392 | MET  | CA-C-O  | -5.44 | 108.67      | 120.10   |
| 1   | A     | 255 | ARG  | O-C-N   | 5.44  | 131.41      | 122.70   |
| 1   | A     | 634 | ASN  | O-C-N   | 5.44  | 131.40      | 122.70   |
| 2   | B     | 388 | PRO  | O-C-N   | 5.44  | 131.40      | 122.70   |
| 3   | M     | 469 | GLY  | C-N-CA  | -5.44 | 108.10      | 121.70   |
| 1   | A     | 91  | ILE  | CA-C-O  | -5.44 | 108.68      | 120.10   |
| 1   | A     | 427 | LYS  | O-C-N   | 5.44  | 131.40      | 122.70   |
| 2   | B     | 29  | LYS  | C-N-CA  | -5.43 | 108.11      | 121.70   |
| 1   | A     | 71  | VAL  | O-C-N   | 5.43  | 131.39      | 122.70   |
| 2   | B     | 586 | SER  | CA-C-O  | -5.43 | 108.70      | 120.10   |
| 1   | A     | 316 | LEU  | CA-C-O  | -5.42 | 108.71      | 120.10   |
| 2   | B     | 67  | ILE  | CA-C-O  | -5.42 | 108.71      | 120.10   |
| 1   | A     | 305 | GLU  | CA-C-N  | 5.42  | 129.13      | 117.20   |
| 1   | A     | 611 | LEU  | CA-C-O  | -5.42 | 108.72      | 120.10   |
| 3   | M     | 354 | ASP  | N-CA-CB | 5.42  | 120.35      | 110.60   |

*Continued on next page...*

*Continued from previous page...*

| Mol | Chain | Res | Type | Atoms  | Z     | Observed(°) | Ideal(°) |
|-----|-------|-----|------|--------|-------|-------------|----------|
| 1   | A     | 313 | MET  | CA-C-O | -5.42 | 108.72      | 120.10   |
| 2   | B     | 248 | LEU  | CA-C-O | -5.42 | 108.72      | 120.10   |
| 1   | A     | 160 | ARG  | O-C-N  | 5.42  | 131.36      | 122.70   |
| 1   | A     | 433 | ILE  | CA-C-O | -5.41 | 108.74      | 120.10   |
| 2   | B     | 482 | ASN  | O-C-N  | 5.41  | 131.38      | 121.10   |
| 1   | A     | 308 | ASP  | N-CA-C | 5.41  | 125.60      | 111.00   |
| 3   | M     | 307 | SER  | O-C-N  | 5.41  | 131.35      | 122.70   |
| 1   | A     | 397 | ASP  | O-C-N  | -5.41 | 114.05      | 122.70   |
| 1   | A     | 593 | THR  | O-C-N  | 5.41  | 131.35      | 122.70   |
| 2   | B     | 94  | ASP  | O-C-N  | 5.41  | 131.35      | 122.70   |
| 2   | B     | 430 | ILE  | CA-C-O | -5.41 | 108.75      | 120.10   |
| 1   | A     | 467 | LYS  | C-N-CA | -5.40 | 108.20      | 121.70   |
| 3   | M     | 16  | PHE  | O-C-N  | -5.40 | 114.06      | 122.70   |
| 2   | B     | 609 | ASP  | O-C-N  | 5.40  | 131.34      | 122.70   |
| 2   | B     | 439 | CYS  | CA-C-O | -5.40 | 108.77      | 120.10   |
| 1   | A     | 136 | GLY  | CA-C-N | 5.39  | 129.06      | 117.20   |
| 2   | B     | 213 | LEU  | CA-C-O | -5.39 | 108.78      | 120.10   |
| 2   | B     | 360 | LEU  | CA-C-O | -5.39 | 108.78      | 120.10   |
| 2   | B     | 120 | ILE  | O-C-N  | 5.39  | 131.32      | 122.70   |
| 1   | A     | 455 | MET  | O-C-N  | 5.39  | 131.32      | 122.70   |
| 2   | B     | 363 | ILE  | CA-C-O | -5.39 | 108.79      | 120.10   |
| 1   | A     | 368 | ARG  | O-C-N  | 5.38  | 131.31      | 122.70   |
| 1   | A     | 572 | PHE  | O-C-N  | 5.38  | 131.30      | 122.70   |
| 1   | A     | 604 | LEU  | CA-C-O | -5.37 | 108.82      | 120.10   |
| 1   | A     | 566 | PHE  | O-C-N  | 5.37  | 131.30      | 122.70   |
| 1   | A     | 226 | SER  | C-N-CA | -5.37 | 108.28      | 121.70   |
| 1   | A     | 390 | THR  | CA-C-O | -5.37 | 108.83      | 120.10   |
| 1   | A     | 624 | LEU  | CA-C-O | -5.37 | 108.83      | 120.10   |
| 2   | B     | 544 | THR  | CA-C-O | -5.37 | 108.83      | 120.10   |
| 4   | S     | 76  | ILE  | O-C-N  | -5.37 | 114.11      | 122.70   |
| 4   | S     | 125 | TRP  | O-C-N  | 5.37  | 131.28      | 122.70   |
| 2   | B     | 577 | ASN  | CA-C-N | 5.36  | 132.11      | 117.10   |
| 1   | A     | 105 | VAL  | CA-C-O | -5.36 | 108.85      | 120.10   |
| 1   | A     | 216 | SER  | CA-C-O | -5.36 | 108.85      | 120.10   |
| 1   | A     | 391 | LEU  | CA-C-O | 5.35  | 131.34      | 120.10   |
| 1   | A     | 466 | ASP  | N-CA-C | -5.35 | 96.55       | 111.00   |
| 1   | A     | 180 | LYS  | O-C-N  | 5.35  | 131.26      | 122.70   |
| 1   | A     | 181 | ALA  | O-C-N  | 5.35  | 131.25      | 122.70   |
| 2   | B     | 219 | TYR  | N-CA-C | 5.34  | 125.43      | 111.00   |
| 1   | A     | 559 | PHE  | CA-C-O | -5.34 | 108.88      | 120.10   |
| 1   | A     | 518 | CYS  | O-C-N  | 5.34  | 131.24      | 122.70   |
| 1   | A     | 172 | SER  | C-N-CA | -5.33 | 108.37      | 121.70   |

*Continued on next page...*

*Continued from previous page...*

| Mol | Chain | Res | Type | Atoms  | Z     | Observed(°) | Ideal(°) |
|-----|-------|-----|------|--------|-------|-------------|----------|
| 1   | A     | 277 | LYS  | CA-C-N | 5.33  | 128.93      | 117.20   |
| 2   | B     | 364 | HIS  | O-C-N  | 5.33  | 131.23      | 122.70   |
| 3   | M     | 25  | PRO  | N-CA-C | -5.33 | 98.25       | 112.10   |
| 2   | B     | 61  | ASP  | O-C-N  | 5.33  | 131.22      | 122.70   |
| 2   | B     | 178 | ILE  | CA-C-O | -5.33 | 108.91      | 120.10   |
| 1   | A     | 312 | ALA  | CA-C-O | -5.32 | 108.92      | 120.10   |
| 1   | A     | 434 | SER  | CA-C-O | -5.32 | 108.94      | 120.10   |
| 1   | A     | 493 | ALA  | CA-C-O | -5.32 | 108.94      | 120.10   |
| 2   | B     | 132 | SER  | CA-C-O | 5.32  | 131.26      | 120.10   |
| 2   | B     | 595 | VAL  | CA-C-O | -5.32 | 108.94      | 120.10   |
| 1   | A     | 345 | ASN  | O-C-N  | 5.31  | 131.20      | 122.70   |
| 1   | A     | 314 | ALA  | O-C-N  | 5.31  | 131.20      | 122.70   |
| 2   | B     | 354 | GLY  | N-CA-C | -5.31 | 99.83       | 113.10   |
| 2   | B     | 169 | VAL  | CA-C-O | -5.30 | 108.97      | 120.10   |
| 2   | B     | 196 | LEU  | CA-C-O | -5.30 | 108.97      | 120.10   |
| 4   | S     | 18  | LYS  | CA-C-O | 5.30  | 131.22      | 120.10   |
| 1   | A     | 110 | ALA  | CA-C-O | 5.29  | 131.22      | 120.10   |
| 1   | A     | 115 | TYR  | C-N-CA | 5.29  | 134.93      | 121.70   |
| 4   | S     | 95  | GLU  | CA-C-O | -5.29 | 108.99      | 120.10   |
| 2   | B     | 616 | SER  | O-C-N  | 5.29  | 131.16      | 122.70   |
| 3   | M     | 55  | MET  | O-C-N  | -5.29 | 114.24      | 122.70   |
| 1   | A     | 237 | SER  | O-C-N  | 5.28  | 131.14      | 121.10   |
| 1   | A     | 335 | CYS  | CA-C-O | -5.28 | 109.01      | 120.10   |
| 2   | B     | 357 | GLU  | O-C-N  | 5.28  | 131.15      | 122.70   |
| 2   | B     | 467 | VAL  | CA-C-O | -5.28 | 109.00      | 120.10   |
| 1   | A     | 244 | LEU  | CA-C-O | 5.28  | 131.19      | 120.10   |
| 1   | A     | 470 | GLY  | O-C-N  | 5.28  | 131.15      | 122.70   |
| 3   | M     | 309 | GLN  | O-C-N  | 5.28  | 131.15      | 122.70   |
| 1   | A     | 505 | ASN  | O-C-N  | -5.28 | 114.25      | 122.70   |
| 3   | M     | 284 | SER  | CA-C-O | 5.28  | 131.18      | 120.10   |
| 1   | A     | 382 | ASP  | O-C-N  | 5.28  | 131.14      | 122.70   |
| 1   | A     | 398 | GLU  | N-CA-C | 5.28  | 125.24      | 111.00   |
| 2   | B     | 451 | MET  | CA-C-O | -5.27 | 109.03      | 120.10   |
| 2   | B     | 188 | TYR  | O-C-N  | 5.27  | 131.13      | 122.70   |
| 3   | M     | 1   | MET  | C-N-CA | -5.27 | 108.53      | 121.70   |
| 2   | B     | 216 | LYS  | CA-C-O | 5.27  | 131.16      | 120.10   |
| 1   | A     | 125 | THR  | CA-C-O | -5.26 | 109.04      | 120.10   |
| 2   | B     | 54  | ARG  | N-CA-C | 5.26  | 125.21      | 111.00   |
| 2   | B     | 533 | LEU  | O-C-N  | 5.26  | 131.12      | 122.70   |
| 2   | B     | 222 | HIS  | N-CA-C | 5.26  | 125.21      | 111.00   |
| 2   | B     | 443 | SER  | CA-C-N | -5.26 | 105.63      | 117.20   |
| 2   | B     | 323 | ASN  | CA-C-O | -5.26 | 109.06      | 120.10   |

*Continued on next page...*

*Continued from previous page...*

| Mol | Chain | Res | Type | Atoms   | Z     | Observed(°) | Ideal(°) |
|-----|-------|-----|------|---------|-------|-------------|----------|
| 1   | A     | 437 | SER  | N-CA-C  | 5.25  | 125.19      | 111.00   |
| 2   | B     | 588 | ILE  | CA-C-O  | -5.25 | 109.07      | 120.10   |
| 1   | A     | 370 | LYS  | CA-C-O  | -5.25 | 109.07      | 120.10   |
| 1   | A     | 528 | ASN  | C-N-CA  | -5.25 | 111.27      | 122.30   |
| 2   | B     | 346 | THR  | CA-C-O  | -5.25 | 109.07      | 120.10   |
| 1   | A     | 242 | GLU  | CA-C-O  | -5.24 | 109.09      | 120.10   |
| 1   | A     | 496 | ILE  | CA-C-O  | -5.24 | 109.09      | 120.10   |
| 1   | A     | 163 | ALA  | CA-C-O  | 5.24  | 131.10      | 120.10   |
| 2   | B     | 554 | LYS  | CA-C-O  | -5.24 | 109.10      | 120.10   |
| 2   | B     | 589 | SER  | CA-C-O  | -5.24 | 109.09      | 120.10   |
| 2   | B     | 319 | LEU  | CA-C-O  | -5.24 | 109.10      | 120.10   |
| 2   | B     | 439 | CYS  | O-C-N   | 5.24  | 132.11      | 123.20   |
| 2   | B     | 192 | LEU  | CA-C-O  | -5.24 | 109.11      | 120.10   |
| 4   | S     | 78  | LYS  | O-C-N   | -5.24 | 114.32      | 122.70   |
| 1   | A     | 516 | ILE  | CA-C-O  | -5.23 | 109.11      | 120.10   |
| 2   | B     | 63  | MET  | CA-C-O  | -5.22 | 109.13      | 120.10   |
| 3   | M     | 331 | LEU  | CA-C-N  | -5.22 | 105.75      | 116.20   |
| 1   | A     | 526 | VAL  | C-N-CA  | 5.22  | 134.75      | 121.70   |
| 1   | A     | 327 | ASP  | O-C-N   | 5.22  | 131.01      | 121.10   |
| 1   | A     | 85  | ALA  | O-C-N   | 5.21  | 131.03      | 122.70   |
| 2   | B     | 118 | LEU  | O-C-N   | 5.21  | 131.03      | 122.70   |
| 2   | B     | 489 | ILE  | CA-C-O  | -5.21 | 109.16      | 120.10   |
| 1   | A     | 341 | ILE  | CA-C-O  | -5.21 | 109.17      | 120.10   |
| 1   | A     | 562 | TRP  | CA-C-O  | -5.20 | 109.17      | 120.10   |
| 3   | M     | 90  | PHE  | CA-C-O  | -5.20 | 109.19      | 120.10   |
| 3   | M     | 323 | MET  | C-N-CA  | -5.19 | 108.71      | 121.70   |
| 1   | A     | 548 | GLN  | O-C-N   | 5.19  | 131.01      | 122.70   |
| 1   | A     | 634 | ASN  | CA-C-O  | -5.19 | 109.19      | 120.10   |
| 2   | B     | 494 | ALA  | CA-C-O  | -5.19 | 109.20      | 120.10   |
| 2   | B     | 411 | ILE  | CA-C-O  | -5.19 | 109.20      | 120.10   |
| 1   | A     | 330 | LEU  | CA-C-O  | -5.19 | 109.21      | 120.10   |
| 2   | B     | 503 | LEU  | CA-C-N  | -5.19 | 105.79      | 117.20   |
| 2   | B     | 223 | LEU  | CA-C-O  | 5.18  | 130.99      | 120.10   |
| 1   | A     | 146 | ALA  | CA-C-O  | -5.18 | 109.22      | 120.10   |
| 1   | A     | 278 | ILE  | O-C-N   | -5.18 | 114.42      | 122.70   |
| 3   | M     | 122 | SER  | CA-C-O  | -5.17 | 109.24      | 120.10   |
| 1   | A     | 370 | LYS  | O-C-N   | 5.17  | 130.98      | 122.70   |
| 4   | S     | 141 | VAL  | N-CA-C  | -5.17 | 97.03       | 111.00   |
| 1   | A     | 178 | ARG  | O-C-N   | 5.17  | 130.97      | 122.70   |
| 1   | A     | 253 | ILE  | CA-C-O  | -5.17 | 109.25      | 120.10   |
| 3   | M     | 354 | ASP  | CB-CA-C | 5.17  | 120.73      | 110.40   |
| 2   | B     | 399 | LEU  | O-C-N   | -5.16 | 114.44      | 122.70   |

*Continued on next page...*

*Continued from previous page...*

| Mol | Chain | Res | Type | Atoms   | Z     | Observed(°) | Ideal(°) |
|-----|-------|-----|------|---------|-------|-------------|----------|
| 2   | B     | 551 | LEU  | CA-C-O  | -5.16 | 109.26      | 120.10   |
| 2   | B     | 112 | ASP  | CA-C-O  | -5.16 | 109.26      | 120.10   |
| 2   | B     | 175 | LEU  | O-C-N   | 5.16  | 130.96      | 122.70   |
| 3   | M     | 117 | ASN  | CA-C-O  | -5.16 | 109.26      | 120.10   |
| 1   | A     | 134 | TYR  | C-N-CA  | -5.16 | 108.80      | 121.70   |
| 1   | A     | 221 | VAL  | CA-C-O  | -5.16 | 109.27      | 120.10   |
| 4   | S     | 103 | GLN  | CA-C-O  | -5.15 | 109.28      | 120.10   |
| 1   | A     | 474 | GLY  | CA-C-O  | -5.15 | 111.32      | 120.60   |
| 1   | A     | 533 | ILE  | O-C-N   | 5.15  | 130.94      | 122.70   |
| 2   | B     | 166 | SER  | C-N-CA  | 5.15  | 134.58      | 121.70   |
| 2   | B     | 304 | GLN  | O-C-N   | 5.15  | 130.94      | 122.70   |
| 2   | B     | 350 | THR  | N-CA-C  | 5.15  | 124.91      | 111.00   |
| 1   | A     | 94  | VAL  | CA-C-O  | 5.15  | 130.91      | 120.10   |
| 1   | A     | 174 | ARG  | C-N-CD  | -5.15 | 109.28      | 120.60   |
| 1   | A     | 239 | LEU  | C-N-CA  | -5.15 | 108.83      | 121.70   |
| 2   | B     | 566 | ALA  | N-CA-CB | -5.15 | 102.89      | 110.10   |
| 1   | A     | 141 | VAL  | CA-C-O  | -5.14 | 109.30      | 120.10   |
| 2   | B     | 577 | ASN  | N-CA-CB | -5.14 | 101.34      | 110.60   |
| 1   | A     | 597 | GLN  | O-C-N   | 5.14  | 130.92      | 122.70   |
| 2   | B     | 470 | ALA  | O-C-N   | 5.14  | 130.92      | 122.70   |
| 2   | B     | 280 | PRO  | N-CA-C  | -5.13 | 98.75       | 112.10   |
| 1   | A     | 380 | ASP  | CA-C-O  | -5.13 | 109.32      | 120.10   |
| 2   | B     | 608 | ARG  | O-C-N   | 5.13  | 130.91      | 122.70   |
| 2   | B     | 84  | ALA  | O-C-N   | 5.13  | 130.91      | 122.70   |
| 4   | S     | 154 | ASP  | CA-C-O  | -5.13 | 109.33      | 120.10   |
| 1   | A     | 555 | LEU  | CA-C-O  | -5.13 | 109.33      | 120.10   |
| 2   | B     | 134 | LEU  | CA-C-O  | -5.13 | 109.33      | 120.10   |
| 2   | B     | 401 | THR  | C-N-CA  | 5.13  | 134.52      | 121.70   |
| 2   | B     | 530 | LEU  | CA-C-O  | -5.12 | 109.34      | 120.10   |
| 2   | B     | 592 | TYR  | CA-C-O  | -5.12 | 109.34      | 120.10   |
| 4   | S     | 164 | ASP  | CA-C-N  | 5.12  | 128.47      | 117.20   |
| 2   | B     | 391 | ALA  | CA-C-O  | -5.12 | 109.36      | 120.10   |
| 2   | B     | 500 | GLN  | N-CA-C  | 5.12  | 124.81      | 111.00   |
| 1   | A     | 174 | ARG  | O-C-N   | 5.11  | 130.82      | 121.10   |
| 2   | B     | 421 | SER  | N-CA-C  | 5.11  | 124.81      | 111.00   |
| 1   | A     | 230 | PRO  | O-C-N   | 5.11  | 130.87      | 122.70   |
| 2   | B     | 615 | SER  | CA-C-O  | -5.11 | 109.38      | 120.10   |
| 4   | S     | 89  | VAL  | C-N-CA  | -5.11 | 108.93      | 121.70   |
| 4   | S     | 54  | PRO  | CA-C-N  | 5.10  | 131.39      | 117.10   |
| 2   | B     | 116 | THR  | CA-C-O  | -5.10 | 109.38      | 120.10   |
| 2   | B     | 230 | PHE  | CA-C-O  | 5.10  | 130.80      | 120.10   |
| 2   | B     | 492 | LYS  | CA-C-O  | -5.09 | 109.40      | 120.10   |

*Continued on next page...*

*Continued from previous page...*

| Mol | Chain | Res | Type | Atoms   | Z     | Observed(°) | Ideal(°) |
|-----|-------|-----|------|---------|-------|-------------|----------|
| 1   | A     | 302 | ASN  | N-CA-CB | 5.09  | 119.77      | 110.60   |
| 2   | B     | 365 | PHE  | CA-C-O  | -5.09 | 109.41      | 120.10   |
| 1   | A     | 121 | LEU  | CA-C-O  | -5.08 | 109.43      | 120.10   |
| 2   | B     | 590 | GLN  | CA-C-O  | -5.08 | 109.43      | 120.10   |
| 1   | A     | 148 | SER  | O-C-N   | 5.08  | 131.83      | 123.20   |
| 1   | A     | 103 | LYS  | C-N-CA  | -5.07 | 109.02      | 121.70   |
| 1   | A     | 280 | GLU  | O-C-N   | 5.07  | 130.82      | 122.70   |
| 1   | A     | 445 | ASN  | N-CA-C  | -5.07 | 97.30       | 111.00   |
| 1   | A     | 599 | ARG  | O-C-N   | 5.07  | 130.82      | 122.70   |
| 3   | M     | 39  | PRO  | O-C-N   | 5.07  | 130.82      | 122.70   |
| 1   | A     | 305 | GLU  | CA-C-O  | -5.07 | 109.45      | 120.10   |
| 1   | A     | 628 | VAL  | CA-C-O  | -5.07 | 109.45      | 120.10   |
| 1   | A     | 193 | PRO  | O-C-N   | 5.07  | 130.81      | 122.70   |
| 1   | A     | 254 | ILE  | CA-C-O  | -5.07 | 109.46      | 120.10   |
| 1   | A     | 512 | LEU  | CA-C-O  | -5.07 | 109.46      | 120.10   |
| 2   | B     | 340 | ILE  | CA-C-O  | -5.07 | 109.46      | 120.10   |
| 2   | B     | 562 | ASN  | O-C-N   | 5.07  | 130.80      | 122.70   |
| 1   | A     | 179 | LYS  | O-C-N   | 5.06  | 130.80      | 122.70   |
| 2   | B     | 465 | ALA  | O-C-N   | 5.06  | 130.79      | 122.70   |
| 1   | A     | 218 | ALA  | CA-C-O  | -5.06 | 109.48      | 120.10   |
| 1   | A     | 338 | PHE  | CA-C-O  | -5.06 | 109.48      | 120.10   |
| 1   | A     | 199 | ASN  | N-CA-C  | 5.05  | 124.64      | 111.00   |
| 1   | A     | 337 | LEU  | CA-C-O  | -5.05 | 109.49      | 120.10   |
| 1   | A     | 422 | GLU  | O-C-N   | 5.05  | 130.78      | 122.70   |
| 1   | A     | 502 | ASP  | O-C-N   | 5.05  | 130.77      | 122.70   |
| 2   | B     | 426 | GLU  | CA-C-O  | -5.05 | 109.50      | 120.10   |
| 2   | B     | 548 | ILE  | CA-C-O  | -5.04 | 109.51      | 120.10   |
| 1   | A     | 113 | SER  | N-CA-C  | 5.04  | 124.60      | 111.00   |
| 1   | A     | 252 | ILE  | CA-C-O  | -5.04 | 109.52      | 120.10   |
| 1   | A     | 602 | GLU  | CA-C-O  | -5.04 | 109.52      | 120.10   |
| 3   | M     | 316 | ARG  | C-N-CA  | -5.04 | 109.10      | 121.70   |
| 1   | A     | 73  | LYS  | O-C-N   | 5.04  | 130.76      | 122.70   |
| 1   | A     | 383 | ASN  | CA-C-O  | -5.04 | 109.53      | 120.10   |
| 2   | B     | 86  | VAL  | CA-C-O  | -5.04 | 109.53      | 120.10   |
| 3   | M     | 57  | GLY  | O-C-N   | -5.03 | 114.65      | 122.70   |
| 2   | B     | 119 | SER  | CA-C-O  | -5.03 | 109.54      | 120.10   |
| 3   | M     | 234 | ARG  | O-C-N   | -5.03 | 114.66      | 122.70   |
| 1   | A     | 620 | GLY  | O-C-N   | 5.02  | 130.74      | 122.70   |
| 1   | A     | 77  | LEU  | O-C-N   | 5.02  | 130.73      | 122.70   |
| 2   | B     | 210 | CYS  | CA-C-O  | -5.02 | 109.56      | 120.10   |
| 2   | B     | 69  | ILE  | C-N-CA  | -5.02 | 109.16      | 121.70   |
| 4   | S     | 36  | TYR  | CA-C-O  | -5.02 | 109.57      | 120.10   |

*Continued on next page...*



*Continued from previous page...*

| Mol | Chain | Res | Type | Atoms  | Z     | Observed(°) | Ideal(°) |
|-----|-------|-----|------|--------|-------|-------------|----------|
| 1   | A     | 90  | HIS  | CA-C-O | -5.01 | 109.57      | 120.10   |
| 2   | B     | 34  | SER  | O-C-N  | 5.01  | 130.72      | 122.70   |
| 2   | B     | 60  | ARG  | CA-C-O | -5.01 | 109.58      | 120.10   |
| 2   | B     | 157 | THR  | CA-C-O | -5.01 | 109.58      | 120.10   |
| 4   | S     | 12  | CYS  | C-N-CA | -5.01 | 109.18      | 121.70   |
| 1   | A     | 323 | CYS  | O-C-N  | -5.01 | 114.69      | 122.70   |
| 4   | S     | 132 | LEU  | CA-C-O | -5.01 | 109.58      | 120.10   |
| 1   | A     | 185 | LEU  | CA-C-O | -5.00 | 109.59      | 120.10   |
| 1   | A     | 469 | LEU  | CA-C-N | -5.00 | 106.19      | 116.20   |
| 4   | S     | 157 | ASN  | CA-C-O | -5.00 | 109.59      | 120.10   |
| 1   | A     | 85  | ALA  | CA-C-N | -5.00 | 106.19      | 117.20   |
| 2   | B     | 482 | ASN  | CA-C-O | -5.00 | 109.59      | 120.10   |
| 1   | A     | 431 | VAL  | CA-C-O | -5.00 | 109.60      | 120.10   |
| 1   | A     | 560 | SER  | O-C-N  | 5.00  | 130.70      | 122.70   |

There are no chirality outliers.

All (99) planarity outliers are listed below:

| Mol | Chain | Res | Type | Group     |
|-----|-------|-----|------|-----------|
| 1   | A     | 117 | ASP  | Mainchain |
| 1   | A     | 174 | ARG  | Mainchain |
| 1   | A     | 192 | TYR  | Mainchain |
| 1   | A     | 199 | ASN  | Mainchain |
| 1   | A     | 204 | VAL  | Mainchain |
| 1   | A     | 219 | VAL  | Mainchain |
| 1   | A     | 233 | PHE  | Mainchain |
| 1   | A     | 240 | LEU  | Mainchain |
| 1   | A     | 244 | LEU  | Mainchain |
| 1   | A     | 260 | PHE  | Mainchain |
| 1   | A     | 275 | LEU  | Mainchain |
| 1   | A     | 277 | LYS  | Mainchain |
| 1   | A     | 278 | ILE  | Mainchain |
| 1   | A     | 282 | MET  | Mainchain |
| 1   | A     | 298 | ILE  | Mainchain |
| 1   | A     | 302 | ASN  | Mainchain |
| 1   | A     | 306 | GLU  | Mainchain |
| 1   | A     | 319 | LEU  | Mainchain |
| 1   | A     | 320 | HIS  | Mainchain |
| 1   | A     | 323 | CYS  | Mainchain |
| 1   | A     | 325 | SER  | Mainchain |
| 1   | A     | 328 | PRO  | Mainchain |
| 1   | A     | 350 | SER  | Mainchain |

*Continued on next page...*

*Continued from previous page...*

| <b>Mol</b> | <b>Chain</b> | <b>Res</b> | <b>Type</b> | <b>Group</b> |
|------------|--------------|------------|-------------|--------------|
| 1          | A            | 399        | ASP         | Peptide      |
| 1          | A            | 400        | VAL         | Peptide      |
| 1          | A            | 441        | TYR         | Mainchain    |
| 1          | A            | 462        | GLN         | Mainchain    |
| 1          | A            | 487        | MET         | Mainchain    |
| 1          | A            | 500        | SER         | Mainchain    |
| 1          | A            | 501        | ASN         | Mainchain    |
| 1          | A            | 505        | ASN         | Mainchain    |
| 1          | A            | 506        | LYS         | Mainchain    |
| 1          | A            | 527        | GLU         | Mainchain    |
| 1          | A            | 528        | ASN         | Mainchain    |
| 1          | A            | 529        | GLY         | Mainchain    |
| 1          | A            | 531        | ASP         | Mainchain    |
| 1          | A            | 535        | ILE         | Mainchain    |
| 1          | A            | 536        | MET         | Mainchain    |
| 1          | A            | 538        | GLU         | Mainchain    |
| 1          | A            | 539        | ASN         | Mainchain    |
| 1          | A            | 565        | ASN         | Mainchain    |
| 1          | A            | 569        | ASP         | Mainchain    |
| 1          | A            | 571        | ARG         | Mainchain    |
| 1          | A            | 586        | GLU         | Mainchain    |
| 1          | A            | 588        | LEU         | Mainchain    |
| 1          | A            | 64         | LEU         | Mainchain    |
| 1          | A            | 80         | TYR         | Mainchain    |
| 1          | A            | 84         | MET         | Mainchain    |
| 1          | A            | 94         | VAL         | Mainchain    |
| 2          | B            | 126        | SER         | Mainchain    |
| 2          | B            | 142        | LEU         | Mainchain    |
| 2          | B            | 147        | MET         | Mainchain    |
| 2          | B            | 237        | ILE         | Mainchain    |
| 2          | B            | 267        | ASP         | Mainchain    |
| 2          | B            | 278        | PRO         | Peptide      |
| 2          | B            | 288        | TYR         | Mainchain    |
| 2          | B            | 326        | TYR         | Mainchain    |
| 2          | B            | 375        | LEU         | Mainchain    |
| 2          | B            | 377        | TYR         | Mainchain    |
| 2          | B            | 381        | PHE         | Mainchain    |
| 2          | B            | 384        | PHE         | Mainchain    |
| 2          | B            | 404        | ASN         | Mainchain    |
| 2          | B            | 41         | ASN         | Peptide      |
| 2          | B            | 444        | THR         | Mainchain    |
| 2          | B            | 459        | GLU         | Mainchain    |

*Continued on next page...*

*Continued from previous page...*

| Mol | Chain | Res | Type | Group     |
|-----|-------|-----|------|-----------|
| 2   | B     | 485 | LYS  | Mainchain |
| 2   | B     | 497 | LEU  | Mainchain |
| 2   | B     | 523 | PHE  | Mainchain |
| 2   | B     | 536 | ASN  | Mainchain |
| 2   | B     | 557 | SER  | Mainchain |
| 2   | B     | 56  | SER  | Mainchain |
| 2   | B     | 565 | GLN  | Mainchain |
| 2   | B     | 569 | THR  | Mainchain |
| 2   | B     | 573 | GLU  | Mainchain |
| 2   | B     | 584 | SER  | Mainchain |
| 2   | B     | 78  | ASP  | Mainchain |
| 2   | B     | 82  | TYR  | Mainchain |
| 3   | M     | 265 | ASN  | Mainchain |
| 3   | M     | 284 | SER  | Mainchain |
| 3   | M     | 292 | PRO  | Peptide   |
| 3   | M     | 40  | GLN  | Mainchain |
| 3   | M     | 421 | GLY  | Mainchain |
| 3   | M     | 426 | LYS  | Peptide   |
| 3   | M     | 445 | SER  | Peptide   |
| 3   | M     | 45  | SER  | Peptide   |
| 3   | M     | 456 | SER  | Mainchain |
| 3   | M     | 462 | LYS  | Peptide   |
| 3   | M     | 477 | GLY  | Peptide   |
| 3   | M     | 57  | GLY  | Mainchain |
| 3   | M     | 8   | THR  | Mainchain |
| 3   | M     | 85  | GLY  | Mainchain |
| 4   | S     | 101 | LEU  | Mainchain |
| 4   | S     | 102 | ILE  | Mainchain |
| 4   | S     | 135 | ILE  | Mainchain |
| 4   | S     | 161 | GLU  | Mainchain |
| 4   | S     | 163 | THR  | Peptide   |
| 4   | S     | 167 | ILE  | Peptide   |
| 4   | S     | 43  | ASN  | Mainchain |
| 4   | S     | 53  | THR  | Mainchain |

## 5.2 Too-close contacts [\(i\)](#)

In the following table, the Non-H and H(model) columns list the number of non-hydrogen atoms and hydrogen atoms in the chain respectively. The H(added) column lists the number of hydrogen atoms added and optimized by MolProbity. The Clashes column lists the number of clashes within the asymmetric unit, whereas Symm-Clashes lists symmetry-related clashes.

| Mol | Chain | Non-H | H(model) | H(added) | Clashes | Symm-Clashes |
|-----|-------|-------|----------|----------|---------|--------------|
| 1   | A     | 4625  | 0        | 4688     | 2296    | 0            |
| 2   | B     | 4954  | 0        | 4969     | 3353    | 0            |
| 3   | M     | 3106  | 0        | 3081     | 1519    | 0            |
| 4   | S     | 1356  | 0        | 1329     | 910     | 0            |
| All | All   | 14041 | 0        | 14067    | 7266    | 0            |

The all-atom clashscore is defined as the number of clashes found per 1000 atoms (including hydrogen atoms). The all-atom clashscore for this structure is 258.

All (7266) close contacts within the same asymmetric unit are listed below, sorted by their clash magnitude.

| Atom-1           | Atom-2           | Interatomic distance (Å) | Clash overlap (Å) |
|------------------|------------------|--------------------------|-------------------|
| 4:S:8:PHE:CE1    | 4:S:84:TYR:HB2   | 1.15                     | 1.68              |
| 2:B:171:GLY:CA   | 2:B:207:VAL:HG13 | 1.22                     | 1.64              |
| 1:A:140:VAL:HA   | 1:A:177:ILE:CG1  | 1.17                     | 1.64              |
| 1:A:102:GLN:CG   | 4:S:166:LYS:H    | 1.11                     | 1.63              |
| 1:A:633:PHE:CE1  | 2:B:513:TRP:CE3  | 1.74                     | 1.63              |
| 2:B:127:LEU:HD13 | 2:B:157:THR:CG2  | 1.14                     | 1.62              |
| 2:B:219:TYR:HB3  | 2:B:223:LEU:CD2  | 1.19                     | 1.61              |
| 1:A:217:ALA:CA   | 4:S:142:ILE:HB   | 1.14                     | 1.61              |
| 3:M:104:PHE:CE1  | 3:M:113:LYS:HE2  | 1.25                     | 1.61              |
| 2:B:123:LEU:CD1  | 2:B:142:LEU:HG   | 1.29                     | 1.61              |
| 2:B:252:LEU:HD13 | 2:B:302:PHE:CD1  | 1.15                     | 1.61              |
| 4:S:5:VAL:HG21   | 4:S:132:LEU:CD2  | 1.26                     | 1.61              |
| 1:A:288:THR:HG21 | 1:A:322:PHE:CZ   | 1.25                     | 1.60              |
| 2:B:216:LYS:CB   | 2:B:251:LEU:HD13 | 1.19                     | 1.60              |
| 4:S:8:PHE:CE1    | 4:S:84:TYR:CB    | 1.77                     | 1.60              |
| 2:B:83:PHE:CZ    | 2:B:119:SER:HB3  | 1.14                     | 1.60              |
| 2:B:260:LEU:HB3  | 2:B:291:TYR:CE1  | 1.14                     | 1.60              |
| 3:M:449:VAL:CG1  | 3:M:452:ILE:HD11 | 1.26                     | 1.60              |
| 2:B:556:LEU:HA   | 2:B:588:ILE:CD1  | 1.27                     | 1.59              |
| 2:B:219:TYR:CE1  | 2:B:226:LEU:CB   | 1.80                     | 1.59              |
| 2:B:260:LEU:CB   | 2:B:291:TYR:HE1  | 1.14                     | 1.59              |
| 3:M:104:PHE:CE1  | 3:M:113:LYS:CE   | 1.74                     | 1.59              |
| 2:B:83:PHE:CE2   | 2:B:119:SER:HB3  | 1.09                     | 1.59              |
| 2:B:139:LEU:HD23 | 2:B:173:VAL:CA   | 1.23                     | 1.59              |
| 1:A:557:LYS:CE   | 2:B:606:ASP:H    | 1.06                     | 1.58              |
| 2:B:433:VAL:HG12 | 2:B:474:VAL:CG2  | 1.24                     | 1.58              |
| 3:M:215:TYR:CD1  | 3:M:468:LYS:HA   | 1.35                     | 1.58              |
| 1:A:105:VAL:HG23 | 4:S:167:ILE:CD1  | 1.11                     | 1.58              |
| 1:A:105:VAL:H    | 4:S:167:ILE:CD1  | 1.13                     | 1.58              |
| 3:M:69:ILE:CD1   | 3:M:90:PHE:HZ    | 1.10                     | 1.57              |

*Continued on next page...*

*Continued from previous page...*

| Atom-1           | Atom-2           | Interatomic distance (Å) | Clash overlap (Å) |
|------------------|------------------|--------------------------|-------------------|
| 3:M:244:VAL:HA   | 3:M:472:TYR:CD2  | 1.13                     | 1.57              |
| 2:B:316:THR:HG21 | 3:M:90:PHE:CE2   | 1.38                     | 1.57              |
| 2:B:546:CYS:HB2  | 2:B:607:ILE:CG1  | 1.20                     | 1.57              |
| 3:M:104:PHE:CZ   | 3:M:113:LYS:CE   | 1.80                     | 1.57              |
| 3:M:379:LEU:HD22 | 3:M:386:PHE:CD1  | 1.36                     | 1.57              |
| 2:B:2:VAL:CG1    | 2:B:6:HIS:NE2    | 1.67                     | 1.57              |
| 2:B:319:LEU:CD1  | 2:B:358:MET:CG   | 1.80                     | 1.57              |
| 2:B:523:PHE:HZ   | 2:B:580:TYR:CD2  | 1.21                     | 1.57              |
| 1:A:605:GLU:HG3  | 1:A:632:PHE:CD2  | 1.37                     | 1.57              |
| 2:B:291:TYR:HD2  | 2:B:294:VAL:CG1  | 1.18                     | 1.57              |
| 2:B:549:LEU:HD21 | 2:B:611:ALA:CA   | 1.29                     | 1.56              |
| 2:B:275:ARG:HB2  | 2:B:294:VAL:CG1  | 1.32                     | 1.56              |
| 1:A:630:PRO:CG   | 2:B:614:ILE:HG12 | 1.18                     | 1.56              |
| 2:B:87:VAL:HG13  | 2:B:122:SER:CB   | 1.17                     | 1.56              |
| 1:A:384:LEU:HD22 | 1:A:441:TYR:CE2  | 1.41                     | 1.55              |
| 2:B:472:VAL:HG11 | 2:B:510:GLY:CA   | 1.35                     | 1.55              |
| 2:B:523:PHE:CZ   | 2:B:580:TYR:HD2  | 1.21                     | 1.55              |
| 2:B:275:ARG:CG   | 2:B:294:VAL:HG11 | 1.24                     | 1.55              |
| 2:B:70:MET:CE    | 2:B:107:ARG:HB2  | 1.11                     | 1.55              |
| 2:B:162:VAL:CG2  | 2:B:195:ILE:HG23 | 1.29                     | 1.55              |
| 3:M:223:HIS:HA   | 3:M:479:PHE:CD2  | 1.38                     | 1.55              |
| 4:S:73:ILE:CG2   | 4:S:88:ILE:HG23  | 1.37                     | 1.55              |
| 2:B:24:ALA:HB3   | 2:B:35:TYR:CE2   | 1.41                     | 1.54              |
| 1:A:633:PHE:CG   | 2:B:550:VAL:HG12 | 1.03                     | 1.54              |
| 2:B:216:LYS:HA   | 2:B:251:LEU:CD1  | 1.32                     | 1.54              |
| 2:B:513:TRP:HA   | 2:B:551:LEU:CD2  | 1.37                     | 1.54              |
| 2:B:267:ASP:H    | 2:B:289:PRO:CB   | 1.15                     | 1.54              |
| 3:M:69:ILE:CD1   | 3:M:90:PHE:CZ    | 1.87                     | 1.54              |
| 1:A:217:ALA:HA   | 4:S:142:ILE:CB   | 1.06                     | 1.54              |
| 1:A:595:GLU:HG3  | 2:B:469:ASP:CB   | 1.18                     | 1.54              |
| 1:A:217:ALA:HB1  | 4:S:142:ILE:CD1  | 1.34                     | 1.53              |
| 2:B:556:LEU:CA   | 2:B:588:ILE:HD11 | 1.34                     | 1.53              |
| 2:B:127:LEU:CB   | 2:B:157:THR:HG23 | 1.35                     | 1.53              |
| 2:B:162:VAL:CG2  | 2:B:195:ILE:CG2  | 1.85                     | 1.53              |
| 2:B:219:TYR:CZ   | 2:B:226:LEU:CA   | 1.92                     | 1.53              |
| 2:B:127:LEU:CD2  | 2:B:161:LEU:HD21 | 1.27                     | 1.53              |
| 3:M:101:LEU:HG   | 3:M:106:LYS:CA   | 1.30                     | 1.52              |
| 2:B:83:PHE:CE2   | 2:B:119:SER:CB   | 1.91                     | 1.52              |
| 2:B:158:VAL:HG11 | 2:B:177:ILE:CG1  | 1.11                     | 1.52              |
| 1:A:630:PRO:HG3  | 2:B:614:ILE:CG1  | 1.07                     | 1.51              |
| 4:S:5:VAL:CG2    | 4:S:132:LEU:HD21 | 1.05                     | 1.51              |

*Continued on next page...*

*Continued from previous page...*

| Atom-1           | Atom-2           | Interatomic distance (Å) | Clash overlap (Å) |
|------------------|------------------|--------------------------|-------------------|
| 2:B:219:TYR:CE1  | 2:B:226:LEU:HB2  | 1.34                     | 1.51              |
| 2:B:537:PHE:HB3  | 2:B:598:LEU:CD1  | 1.35                     | 1.51              |
| 2:B:353:GLN:HG3  | 3:M:47:SER:C     | 1.20                     | 1.51              |
| 2:B:549:LEU:CD2  | 2:B:611:ALA:N    | 1.72                     | 1.50              |
| 2:B:139:LEU:CD2  | 2:B:173:VAL:HA   | 1.07                     | 1.50              |
| 2:B:291:TYR:CD2  | 2:B:294:VAL:CG1  | 1.93                     | 1.50              |
| 2:B:513:TRP:N    | 2:B:551:LEU:CD1  | 1.71                     | 1.50              |
| 2:B:537:PHE:CD2  | 2:B:598:LEU:HB3  | 1.47                     | 1.50              |
| 1:A:128:LEU:HD13 | 1:A:150:LEU:CD2  | 1.38                     | 1.50              |
| 2:B:47:LEU:HD22  | 2:B:66:ILE:CG1   | 1.06                     | 1.50              |
| 2:B:219:TYR:CB   | 2:B:223:LEU:HD23 | 1.42                     | 1.50              |
| 2:B:47:LEU:CD2   | 2:B:66:ILE:HG13  | 1.36                     | 1.49              |
| 2:B:208:ILE:CD1  | 2:B:236:ILE:HG21 | 1.42                     | 1.49              |
| 2:B:219:TYR:CD1  | 2:B:226:LEU:HB2  | 1.46                     | 1.49              |
| 3:M:283:PHE:CZ   | 3:M:289:THR:OG1  | 1.65                     | 1.49              |
| 2:B:215:TYR:CD1  | 2:B:233:TYR:HE1  | 1.29                     | 1.49              |
| 2:B:275:ARG:CB   | 2:B:294:VAL:HG11 | 1.39                     | 1.49              |
| 2:B:278:PRO:HA   | 2:B:288:TYR:C    | 1.21                     | 1.49              |
| 1:A:220:SER:HB3  | 4:S:142:ILE:CG2  | 1.36                     | 1.49              |
| 2:B:127:LEU:HD22 | 2:B:161:LEU:CD2  | 1.38                     | 1.49              |
| 4:S:163:THR:CA   | 4:S:163:THR:C    | 1.81                     | 1.49              |
| 1:A:179:LYS:CE   | 4:S:143:GLU:HB2  | 1.40                     | 1.48              |
| 2:B:223:LEU:CD1  | 2:B:259:TYR:CA   | 1.90                     | 1.48              |
| 1:A:128:LEU:CD1  | 1:A:150:LEU:HD21 | 1.44                     | 1.48              |
| 1:A:204:VAL:HG22 | 1:A:236:LEU:CD2  | 1.43                     | 1.48              |
| 2:B:178:ILE:HG13 | 2:B:214:ALA:C    | 1.17                     | 1.48              |
| 2:B:208:ILE:HD13 | 2:B:236:ILE:CG2  | 1.01                     | 1.48              |
| 2:B:219:TYR:CZ   | 2:B:226:LEU:HB2  | 1.49                     | 1.48              |
| 2:B:559:ASP:HB2  | 2:B:563:PHE:CD1  | 1.46                     | 1.48              |
| 1:A:408:ILE:CG2  | 4:S:64:ASN:C     | 1.81                     | 1.48              |
| 2:B:537:PHE:CB   | 2:B:598:LEU:HD13 | 1.43                     | 1.48              |
| 1:A:408:ILE:HG22 | 4:S:65:ASN:N     | 1.20                     | 1.47              |
| 2:B:275:ARG:CB   | 2:B:294:VAL:CG1  | 1.90                     | 1.47              |
| 1:A:128:LEU:CD1  | 1:A:150:LEU:CD2  | 1.91                     | 1.47              |
| 1:A:212:ILE:CD1  | 4:S:145:ASN:ND2  | 1.73                     | 1.47              |
| 2:B:303:LEU:CD1  | 2:B:333:GLN:HB3  | 1.41                     | 1.47              |
| 2:B:337:THR:HA   | 2:B:373:LEU:CD2  | 1.44                     | 1.47              |
| 2:B:433:VAL:CG1  | 2:B:474:VAL:HG21 | 1.43                     | 1.47              |
| 2:B:70:MET:HE1   | 2:B:107:ARG:CB   | 1.43                     | 1.47              |
| 2:B:523:PHE:CZ   | 2:B:580:TYR:CD2  | 1.96                     | 1.47              |
| 2:B:252:LEU:CD1  | 2:B:302:PHE:CD1  | 1.97                     | 1.46              |

*Continued on next page...*

*Continued from previous page...*

| Atom-1           | Atom-2           | Interatomic distance (Å) | Clash overlap (Å) |
|------------------|------------------|--------------------------|-------------------|
| 1:A:100:LEU:H    | 4:S:162:SER:CB   | 1.25                     | 1.46              |
| 1:A:105:VAL:CG2  | 4:S:167:ILE:CD1  | 1.91                     | 1.46              |
| 2:B:70:MET:CE    | 2:B:107:ARG:CB   | 1.93                     | 1.46              |
| 2:B:230:PHE:CE1  | 2:B:252:LEU:HD23 | 1.50                     | 1.46              |
| 2:B:20:ARG:NH1   | 2:B:21:GLU:HG3   | 1.23                     | 1.46              |
| 2:B:260:LEU:CB   | 2:B:291:TYR:CE1  | 1.88                     | 1.46              |
| 1:A:633:PHE:CG   | 2:B:550:VAL:CG1  | 1.97                     | 1.46              |
| 2:B:83:PHE:CZ    | 2:B:119:SER:CB   | 1.91                     | 1.46              |
| 2:B:219:TYR:CG   | 2:B:255:TYR:HE1  | 1.33                     | 1.46              |
| 3:M:215:TYR:CG   | 3:M:468:LYS:HA   | 1.51                     | 1.46              |
| 2:B:106:LEU:HD13 | 2:B:144:ASP:CB   | 1.45                     | 1.45              |
| 1:A:211:ASP:OD1  | 4:S:148:ARG:CD   | 1.65                     | 1.45              |
| 1:A:408:ILE:HG23 | 4:S:64:ASN:CB    | 1.01                     | 1.45              |
| 4:S:53:THR:C     | 4:S:69:ASN:HB2   | 1.34                     | 1.45              |
| 2:B:127:LEU:CD1  | 2:B:157:THR:HG21 | 0.98                     | 1.45              |
| 3:M:101:LEU:CG   | 3:M:106:LYS:HA   | 1.47                     | 1.45              |
| 2:B:230:PHE:CZ   | 2:B:252:LEU:CD2  | 1.97                     | 1.45              |
| 1:A:147:LEU:HD22 | 1:A:166:LEU:CD2  | 1.46                     | 1.44              |
| 1:A:408:ILE:CG2  | 4:S:64:ASN:CB    | 1.96                     | 1.44              |
| 2:B:247:TYR:CE2  | 3:M:91:THR:HG21  | 1.50                     | 1.44              |
| 2:B:311:TYR:HE2  | 2:B:342:ALA:CB   | 1.30                     | 1.44              |
| 3:M:104:PHE:CE2  | 3:M:113:LYS:NZ   | 1.83                     | 1.44              |
| 2:B:527:PRO:CB   | 2:B:587:ARG:HG3  | 1.47                     | 1.44              |
| 2:B:216:LYS:CA   | 2:B:251:LEU:HD13 | 1.44                     | 1.44              |
| 2:B:549:LEU:CD2  | 2:B:611:ALA:CA   | 1.96                     | 1.44              |
| 2:B:219:TYR:CE1  | 2:B:226:LEU:CD1  | 1.99                     | 1.43              |
| 4:S:109:LEU:HD12 | 4:S:113:PHE:CD1  | 1.48                     | 1.43              |
| 1:A:96:SER:N     | 1:A:127:LEU:CD2  | 1.78                     | 1.43              |
| 1:A:101:GLN:HG3  | 4:S:160:ALA:CB   | 1.44                     | 1.43              |
| 2:B:178:ILE:HG13 | 2:B:215:TYR:N    | 1.30                     | 1.43              |
| 2:B:566:ALA:O    | 2:B:574:ASN:CB   | 1.65                     | 1.43              |
| 1:A:100:LEU:N    | 4:S:162:SER:HB2  | 1.24                     | 1.43              |
| 1:A:107:TYR:CE2  | 1:A:128:LEU:HD21 | 1.49                     | 1.43              |
| 4:S:109:LEU:CD1  | 4:S:113:PHE:CD1  | 2.00                     | 1.43              |
| 1:A:185:LEU:CD1  | 1:A:203:PHE:HE1  | 1.30                     | 1.42              |
| 2:B:219:TYR:CE1  | 2:B:226:LEU:HD13 | 1.53                     | 1.42              |
| 2:B:260:LEU:CD2  | 2:B:291:TYR:OH   | 1.66                     | 1.42              |
| 2:B:279:LEU:N    | 2:B:288:TYR:HB2  | 1.10                     | 1.42              |
| 2:B:549:LEU:CD2  | 2:B:611:ALA:CB   | 1.96                     | 1.42              |
| 2:B:87:VAL:CG1   | 2:B:122:SER:CB   | 1.79                     | 1.42              |
| 2:B:106:LEU:CD1  | 2:B:144:ASP:CB   | 1.95                     | 1.42              |

*Continued on next page...*

*Continued from previous page...*

| Atom-1           | Atom-2           | Interatomic distance (Å) | Clash overlap (Å) |
|------------------|------------------|--------------------------|-------------------|
| 2:B:219:TYR:CD1  | 2:B:226:LEU:HD22 | 1.52                     | 1.42              |
| 1:A:212:ILE:CD1  | 4:S:145:ASN:HD21 | 1.25                     | 1.42              |
| 2:B:20:ARG:CD    | 2:B:21:GLU:HB2   | 1.49                     | 1.42              |
| 1:A:629:LEU:CD1  | 2:B:610:ARG:NH1  | 1.80                     | 1.42              |
| 2:B:311:TYR:CE2  | 2:B:342:ALA:HB2  | 1.54                     | 1.42              |
| 2:B:546:CYS:CB   | 2:B:607:ILE:HG12 | 0.94                     | 1.42              |
| 3:M:245:ASP:N    | 3:M:472:TYR:CD1  | 1.87                     | 1.42              |
| 2:B:309:LEU:HB3  | 2:B:317:VAL:CG1  | 1.48                     | 1.41              |
| 1:A:594:PHE:HB3  | 2:B:473:ASN:CB   | 1.49                     | 1.41              |
| 1:A:631:SER:CB   | 2:B:557:SER:OG   | 1.66                     | 1.41              |
| 2:B:20:ARG:NH1   | 2:B:21:GLU:CG    | 1.83                     | 1.41              |
| 2:B:422:ALA:HB3  | 2:B:424:PHE:CE1  | 1.53                     | 1.41              |
| 3:M:69:ILE:HD12  | 3:M:90:PHE:CZ    | 1.49                     | 1.41              |
| 1:A:408:ILE:HG22 | 4:S:64:ASN:C     | 1.37                     | 1.41              |
| 2:B:108:PHE:CZ   | 2:B:115:LEU:HG   | 1.52                     | 1.41              |
| 2:B:546:CYS:HB2  | 2:B:607:ILE:CD1  | 1.48                     | 1.41              |
| 2:B:546:CYS:CB   | 2:B:607:ILE:CG1  | 1.83                     | 1.41              |
| 2:B:29:LYS:HE2   | 2:B:30:LEU:N     | 1.32                     | 1.41              |
| 3:M:65:TYR:CZ    | 3:M:86:PRO:HB3   | 1.52                     | 1.41              |
| 1:A:250:ASN:OD1  | 1:A:285:THR:CG2  | 1.67                     | 1.40              |
| 2:B:319:LEU:CD1  | 2:B:358:MET:HG3  | 0.93                     | 1.40              |
| 1:A:215:VAL:CG2  | 1:A:243:ILE:HD12 | 1.49                     | 1.40              |
| 2:B:549:LEU:CD2  | 2:B:611:ALA:HB2  | 1.49                     | 1.40              |
| 4:S:73:ILE:CG2   | 4:S:88:ILE:CG2   | 1.98                     | 1.40              |
| 1:A:111:SER:CB   | 1:A:152:THR:OG1  | 1.67                     | 1.40              |
| 4:S:17:VAL:HG21  | 4:S:19:PHE:CZ    | 1.54                     | 1.40              |
| 1:A:102:GLN:HG2  | 4:S:166:LYS:N    | 1.13                     | 1.40              |
| 2:B:352:ASN:CB   | 3:M:49:ASP:OD2   | 1.69                     | 1.40              |
| 2:B:422:ALA:HB3  | 2:B:424:PHE:CD1  | 1.57                     | 1.40              |
| 3:M:319:SER:CB   | 3:M:346:ASN:HB2  | 1.48                     | 1.40              |
| 1:A:450:TYR:OH   | 1:A:476:GLN:CG   | 1.66                     | 1.39              |
| 2:B:158:VAL:CG1  | 2:B:177:ILE:CG1  | 2.01                     | 1.39              |
| 3:M:260:LEU:CD2  | 3:M:449:VAL:HG22 | 1.50                     | 1.39              |
| 1:A:633:PHE:CB   | 2:B:550:VAL:HG12 | 1.52                     | 1.39              |
| 3:M:222:PHE:O    | 3:M:479:PHE:CE2  | 1.75                     | 1.39              |
| 2:B:215:TYR:CD1  | 2:B:233:TYR:CE1  | 2.11                     | 1.39              |
| 4:S:109:LEU:CD1  | 4:S:113:PHE:CE1  | 2.04                     | 1.39              |
| 1:A:217:ALA:C    | 4:S:142:ILE:HB   | 1.43                     | 1.38              |
| 2:B:87:VAL:CG1   | 2:B:122:SER:HB3  | 0.92                     | 1.38              |
| 2:B:170:ARG:HA   | 2:B:199:LEU:CD2  | 1.53                     | 1.38              |
| 3:M:281:GLY:O    | 3:M:282:VAL:CG2  | 1.72                     | 1.38              |

*Continued on next page...*



*Continued from previous page...*

| Atom-1           | Atom-2           | Interatomic distance (Å) | Clash overlap (Å) |
|------------------|------------------|--------------------------|-------------------|
| 1:A:288:THR:CG2  | 1:A:322:PHE:CZ   | 2.06                     | 1.38              |
| 1:A:633:PHE:CD2  | 2:B:550:VAL:C    | 1.97                     | 1.38              |
| 2:B:62:ALA:O     | 2:B:66:ILE:CG1   | 1.70                     | 1.38              |
| 2:B:171:GLY:CA   | 2:B:207:VAL:CG1  | 2.01                     | 1.38              |
| 2:B:549:LEU:HD22 | 2:B:611:ALA:CB   | 1.50                     | 1.38              |
| 2:B:223:LEU:HD13 | 2:B:259:TYR:CB   | 1.53                     | 1.37              |
| 1:A:142:LYS:N    | 4:S:159:ALA:HB2  | 1.33                     | 1.37              |
| 2:B:215:TYR:HD1  | 2:B:233:TYR:CE1  | 1.43                     | 1.37              |
| 2:B:343:LEU:HD12 | 2:B:359:LEU:CD1  | 1.55                     | 1.37              |
| 2:B:261:PRO:HG2  | 2:B:292:GLU:N    | 1.08                     | 1.37              |
| 3:M:290:PHE:CE1  | 3:M:297:PHE:CD1  | 2.13                     | 1.37              |
| 1:A:595:GLU:CG   | 2:B:469:ASP:HB3  | 1.53                     | 1.37              |
| 1:A:629:LEU:HD11 | 2:B:610:ARG:NH1  | 1.09                     | 1.36              |
| 2:B:123:LEU:HD12 | 2:B:142:LEU:CD2  | 1.52                     | 1.36              |
| 2:B:230:PHE:CZ   | 2:B:252:LEU:HD22 | 1.57                     | 1.36              |
| 3:M:443:SER:HB3  | 3:M:447:ILE:CG1  | 1.55                     | 1.36              |
| 2:B:106:LEU:CD1  | 2:B:144:ASP:HB3  | 1.54                     | 1.36              |
| 2:B:353:GLN:NE2  | 3:M:47:SER:CB    | 1.86                     | 1.36              |
| 3:M:223:HIS:HA   | 3:M:479:PHE:CE2  | 1.58                     | 1.36              |
| 4:S:8:PHE:CZ     | 4:S:84:TYR:HB3   | 1.58                     | 1.36              |
| 2:B:261:PRO:CG   | 2:B:292:GLU:H    | 1.37                     | 1.36              |
| 1:A:96:SER:CB    | 1:A:127:LEU:HD11 | 1.54                     | 1.35              |
| 1:A:288:THR:HG21 | 1:A:322:PHE:CE2  | 1.57                     | 1.35              |
| 4:S:17:VAL:CG2   | 4:S:19:PHE:CZ    | 2.09                     | 1.35              |
| 3:M:339:GLU:CD   | 3:M:412:ARG:HE   | 1.24                     | 1.35              |
| 1:A:182:ILE:HG22 | 1:A:221:VAL:CG2  | 1.54                     | 1.35              |
| 1:A:102:GLN:CA   | 4:S:167:ILE:HG12 | 1.57                     | 1.35              |
| 2:B:181:TYR:CD2  | 2:B:218:CYS:O    | 1.79                     | 1.35              |
| 3:M:215:TYR:CD2  | 3:M:469:GLY:N    | 1.91                     | 1.35              |
| 1:A:107:TYR:CE2  | 1:A:128:LEU:CD2  | 2.07                     | 1.34              |
| 1:A:136:GLY:O    | 1:A:139:ASP:HB3  | 1.24                     | 1.34              |
| 2:B:208:ILE:CD1  | 2:B:236:ILE:CG2  | 1.94                     | 1.34              |
| 2:B:393:ILE:CG2  | 2:B:431:MET:HG2  | 1.54                     | 1.34              |
| 1:A:219:VAL:O    | 1:A:259:LEU:HD11 | 1.26                     | 1.34              |
| 1:A:224:GLU:CB   | 4:S:138:GLY:O    | 1.73                     | 1.34              |
| 2:B:219:TYR:CD1  | 2:B:226:LEU:CG   | 2.09                     | 1.34              |
| 4:S:53:THR:HB    | 4:S:69:ASN:N     | 1.02                     | 1.34              |
| 2:B:223:LEU:HD13 | 2:B:259:TYR:CA   | 1.53                     | 1.34              |
| 3:M:245:ASP:O    | 3:M:472:TYR:CE1  | 1.80                     | 1.34              |
| 1:A:291:ILE:CG2  | 1:A:318:ARG:HB3  | 1.57                     | 1.33              |
| 1:A:403:LEU:HD21 | 1:A:421:PRO:C    | 1.48                     | 1.33              |

*Continued on next page...*

*Continued from previous page...*

| Atom-1           | Atom-2           | Interatomic distance (Å) | Clash overlap (Å) |
|------------------|------------------|--------------------------|-------------------|
| 2:B:197:LYS:HA   | 2:B:229:HIS:CD2  | 1.61                     | 1.33              |
| 4:S:8:PHE:CB     | 4:S:36:TYR:HE2   | 1.36                     | 1.33              |
| 1:A:105:VAL:CG2  | 4:S:167:ILE:HD12 | 1.47                     | 1.33              |
| 1:A:185:LEU:CD1  | 1:A:203:PHE:CE1  | 2.09                     | 1.33              |
| 1:A:255:ARG:NH2  | 4:S:135:ILE:CG2  | 1.92                     | 1.33              |
| 3:M:101:LEU:O    | 3:M:106:LYS:N    | 1.58                     | 1.33              |
| 2:B:140:SER:HB2  | 2:B:172:GLU:CD   | 1.46                     | 1.33              |
| 2:B:252:LEU:CD1  | 2:B:302:PHE:CE1  | 2.10                     | 1.33              |
| 2:B:566:ALA:HA   | 2:B:574:ASN:CB   | 1.55                     | 1.33              |
| 1:A:520:GLY:CA   | 1:A:558:VAL:HG22 | 1.56                     | 1.33              |
| 2:B:353:GLN:NE2  | 3:M:47:SER:HB3   | 1.00                     | 1.33              |
| 2:B:559:ASP:CB   | 2:B:563:PHE:CD1  | 2.08                     | 1.33              |
| 1:A:463:ASP:O    | 2:B:1:MET:HG3    | 1.15                     | 1.33              |
| 2:B:546:CYS:HA   | 2:B:607:ILE:CG2  | 1.58                     | 1.33              |
| 4:S:53:THR:CB    | 4:S:69:ASN:N     | 1.90                     | 1.33              |
| 1:A:141:VAL:HG12 | 4:S:159:ALA:CB   | 1.59                     | 1.32              |
| 2:B:106:LEU:CD1  | 2:B:144:ASP:O    | 1.73                     | 1.32              |
| 2:B:519:ALA:O    | 2:B:523:PHE:CB   | 1.74                     | 1.32              |
| 2:B:2:VAL:HG12   | 2:B:6:HIS:NE2    | 1.21                     | 1.32              |
| 2:B:41:ASN:HB3   | 2:B:43:ASN:OD1   | 1.23                     | 1.32              |
| 2:B:219:TYR:CD1  | 2:B:226:LEU:CD2  | 2.11                     | 1.32              |
| 2:B:393:ILE:HG23 | 2:B:431:MET:CB   | 1.56                     | 1.32              |
| 2:B:230:PHE:CE2  | 2:B:298:ASP:O    | 1.80                     | 1.32              |
| 2:B:556:LEU:CD2  | 2:B:588:ILE:HG12 | 1.57                     | 1.32              |
| 2:B:193:LEU:O    | 2:B:195:ILE:N    | 1.60                     | 1.32              |
| 2:B:219:TYR:CG   | 2:B:255:TYR:CE1  | 2.17                     | 1.32              |
| 3:M:244:VAL:CA   | 3:M:472:TYR:CD2  | 2.09                     | 1.32              |
| 1:A:103:LYS:HE3  | 1:A:131:ASP:OD1  | 1.19                     | 1.32              |
| 2:B:352:ASN:CA   | 3:M:49:ASP:OD2   | 1.76                     | 1.32              |
| 2:B:143:SER:C    | 2:B:179:LYS:CD   | 1.97                     | 1.31              |
| 2:B:519:ALA:O    | 2:B:523:PHE:HB3  | 1.16                     | 1.31              |
| 3:M:67:SER:OG    | 3:M:90:PHE:CD1   | 1.71                     | 1.31              |
| 1:A:138:ASN:OD1  | 4:S:158:LYS:CE   | 1.77                     | 1.31              |
| 1:A:255:ARG:NH2  | 4:S:135:ILE:HG23 | 1.41                     | 1.31              |
| 3:M:104:PHE:CE1  | 3:M:113:LYS:NZ   | 1.84                     | 1.31              |
| 3:M:125:PHE:O    | 3:M:129:VAL:CG2  | 1.77                     | 1.31              |
| 2:B:62:ALA:O     | 2:B:66:ILE:CD1   | 1.79                     | 1.31              |
| 2:B:274:PRO:HG2  | 2:B:295:ASN:CG   | 1.45                     | 1.31              |
| 2:B:343:LEU:CD2  | 2:B:362:ALA:HB3  | 1.60                     | 1.31              |
| 3:M:454:ILE:CG2  | 3:M:464:THR:HG21 | 1.61                     | 1.31              |
| 4:S:53:THR:CA    | 4:S:69:ASN:HB2   | 1.60                     | 1.31              |

*Continued on next page...*

*Continued from previous page...*

| Atom-1           | Atom-2           | Interatomic distance (Å) | Clash overlap (Å) |
|------------------|------------------|--------------------------|-------------------|
| 1:A:105:VAL:CB   | 4:S:167:ILE:HD13 | 1.59                     | 1.31              |
| 1:A:140:VAL:CA   | 1:A:177:ILE:CG1  | 2.07                     | 1.31              |
| 1:A:170:LEU:O    | 1:A:206:LYS:HD2  | 1.26                     | 1.31              |
| 1:A:251:TRP:CH2  | 4:S:103:GLN:HB2  | 1.66                     | 1.31              |
| 3:M:283:PHE:CE2  | 3:M:289:THR:OG1  | 1.81                     | 1.31              |
| 1:A:105:VAL:N    | 4:S:167:ILE:CD1  | 1.92                     | 1.31              |
| 1:A:176:TYR:CB   | 4:S:155:GLU:HG3  | 1.61                     | 1.31              |
| 1:A:332:TYR:CD1  | 1:A:366:SER:OG   | 1.77                     | 1.31              |
| 1:A:631:SER:CB   | 2:B:557:SER:CB   | 2.07                     | 1.31              |
| 2:B:117:LEU:HD21 | 2:B:149:SER:OG   | 1.25                     | 1.31              |
| 2:B:230:PHE:HE2  | 2:B:298:ASP:O    | 1.06                     | 1.31              |
| 1:A:429:VAL:CB   | 1:A:469:LEU:HD11 | 1.59                     | 1.30              |
| 1:A:633:PHE:CD1  | 2:B:513:TRP:CZ3  | 2.19                     | 1.30              |
| 2:B:123:LEU:CD1  | 2:B:142:LEU:CG   | 2.08                     | 1.30              |
| 2:B:278:PRO:CA   | 2:B:288:TYR:C    | 1.99                     | 1.30              |
| 3:M:65:TYR:CE1   | 3:M:86:PRO:HB3   | 1.63                     | 1.30              |
| 1:A:252:ILE:HA   | 4:S:144:THR:OG1  | 1.13                     | 1.30              |
| 2:B:158:VAL:HG11 | 2:B:177:ILE:CD1  | 1.61                     | 1.30              |
| 2:B:181:TYR:HD2  | 2:B:218:CYS:C    | 1.32                     | 1.30              |
| 2:B:216:LYS:CA   | 2:B:251:LEU:CD1  | 2.01                     | 1.30              |
| 3:M:218:LEU:HA   | 3:M:472:TYR:CE2  | 1.67                     | 1.30              |
| 4:S:8:PHE:CB     | 4:S:36:TYR:CE2   | 2.13                     | 1.30              |
| 4:S:8:PHE:HB2    | 4:S:36:TYR:CE2   | 1.66                     | 1.30              |
| 2:B:140:SER:CB   | 2:B:172:GLU:OE1  | 1.80                     | 1.30              |
| 2:B:559:ASP:O    | 2:B:563:PHE:N    | 1.64                     | 1.30              |
| 3:M:60:LEU:HD22  | 3:M:62:VAL:CG2   | 1.60                     | 1.30              |
| 3:M:317:MET:HB3  | 3:M:320:ILE:O    | 1.13                     | 1.30              |
| 1:A:384:LEU:CD2  | 1:A:441:TYR:CE2  | 2.14                     | 1.29              |
| 2:B:274:PRO:C    | 2:B:295:ASN:HD21 | 1.35                     | 1.29              |
| 3:M:217:ASP:CB   | 3:M:470:ALA:C    | 2.00                     | 1.29              |
| 2:B:170:ARG:NH1  | 2:B:198:GLU:HG2  | 1.45                     | 1.29              |
| 2:B:307:ASN:HD21 | 2:B:336:ASN:ND2  | 1.27                     | 1.29              |
| 1:A:275:LEU:HD13 | 1:A:308:ASP:OD1  | 1.23                     | 1.29              |
| 1:A:633:PHE:CD2  | 2:B:551:LEU:N    | 2.01                     | 1.29              |
| 1:A:633:PHE:CD1  | 2:B:550:VAL:HG12 | 1.68                     | 1.29              |
| 2:B:513:TRP:N    | 2:B:551:LEU:HD13 | 0.97                     | 1.29              |
| 2:B:566:ALA:CA   | 2:B:574:ASN:HB3  | 1.62                     | 1.29              |
| 1:A:128:LEU:HD13 | 1:A:150:LEU:CG   | 1.62                     | 1.28              |
| 2:B:37:TYR:OH    | 2:B:46:GLN:CD    | 1.71                     | 1.28              |
| 3:M:221:THR:CB   | 3:M:474:THR:O    | 1.81                     | 1.28              |
| 4:S:39:ILE:HD11  | 4:S:77:TYR:CD2   | 1.68                     | 1.28              |

*Continued on next page...*

*Continued from previous page...*

| Atom-1           | Atom-2           | Interatomic distance (Å) | Clash overlap (Å) |
|------------------|------------------|--------------------------|-------------------|
| 1:A:147:LEU:CD1  | 1:A:181:ALA:HA   | 1.62                     | 1.28              |
| 2:B:24:ALA:HB3   | 2:B:35:TYR:CZ    | 1.66                     | 1.28              |
| 2:B:279:LEU:H    | 2:B:288:TYR:CB   | 1.44                     | 1.28              |
| 2:B:418:TYR:OH   | 2:B:432:ALA:HB2  | 1.18                     | 1.28              |
| 1:A:633:PHE:CD1  | 2:B:550:VAL:CG1  | 2.14                     | 1.28              |
| 2:B:77:ILE:O     | 2:B:79:VAL:N     | 1.64                     | 1.28              |
| 2:B:181:TYR:HD2  | 2:B:218:CYS:O    | 0.95                     | 1.28              |
| 2:B:227:HIS:O    | 2:B:229:HIS:N    | 1.64                     | 1.28              |
| 2:B:546:CYS:SG   | 2:B:607:ILE:HG12 | 1.71                     | 1.28              |
| 3:M:241:HIS:O    | 3:M:474:THR:HB   | 1.29                     | 1.28              |
| 3:M:319:SER:HB3  | 3:M:346:ASN:N    | 1.48                     | 1.28              |
| 4:S:9:ASN:OD1    | 4:S:13:GLN:N     | 1.63                     | 1.28              |
| 1:A:403:LEU:HD22 | 1:A:422:GLU:CG   | 1.64                     | 1.28              |
| 2:B:116:THR:CG2  | 2:B:150:LEU:HD11 | 1.62                     | 1.28              |
| 3:M:379:LEU:HD22 | 3:M:386:PHE:CG   | 1.65                     | 1.28              |
| 1:A:633:PHE:CE2  | 2:B:551:LEU:N    | 1.98                     | 1.28              |
| 2:B:226:LEU:HB3  | 2:B:255:TYR:OH   | 1.21                     | 1.28              |
| 2:B:563:PHE:HD2  | 2:B:584:SER:CB   | 1.45                     | 1.28              |
| 2:B:274:PRO:HG2  | 2:B:295:ASN:OD1  | 1.13                     | 1.27              |
| 1:A:463:ASP:O    | 2:B:1:MET:CG     | 1.80                     | 1.27              |
| 2:B:315:PRO:HB3  | 2:B:352:ASN:OD1  | 1.34                     | 1.27              |
| 3:M:449:VAL:HG11 | 3:M:452:ILE:CD1  | 1.63                     | 1.27              |
| 2:B:140:SER:HB2  | 2:B:172:GLU:OE1  | 1.10                     | 1.27              |
| 2:B:225:LEU:HD12 | 2:B:283:TYR:OH   | 1.21                     | 1.27              |
| 3:M:339:GLU:HG3  | 3:M:412:ARG:CG   | 1.63                     | 1.27              |
| 1:A:516:ILE:HG22 | 1:A:554:ALA:CB   | 1.63                     | 1.27              |
| 2:B:549:LEU:CD1  | 2:B:611:ALA:HA   | 1.63                     | 1.27              |
| 2:B:127:LEU:CD1  | 2:B:157:THR:CG2  | 1.84                     | 1.27              |
| 2:B:353:GLN:HG3  | 3:M:47:SER:O     | 1.26                     | 1.27              |
| 2:B:512:VAL:C    | 2:B:551:LEU:HD13 | 1.55                     | 1.27              |
| 2:B:513:TRP:CA   | 2:B:551:LEU:CD1  | 2.10                     | 1.27              |
| 3:M:66:PHE:CA    | 3:M:77:LEU:HD11  | 1.63                     | 1.27              |
| 3:M:443:SER:CB   | 3:M:447:ILE:HG13 | 1.65                     | 1.27              |
| 2:B:162:VAL:HG22 | 2:B:199:LEU:CG   | 1.66                     | 1.26              |
| 2:B:316:THR:CG2  | 3:M:90:PHE:CE2   | 2.15                     | 1.26              |
| 2:B:252:LEU:HD12 | 2:B:302:PHE:CE1  | 1.65                     | 1.26              |
| 2:B:278:PRO:CG   | 2:B:292:GLU:OE1  | 1.83                     | 1.26              |
| 2:B:337:THR:CA   | 2:B:373:LEU:HD21 | 1.64                     | 1.26              |
| 2:B:21:GLU:HA    | 2:B:24:ALA:CB    | 1.66                     | 1.26              |
| 2:B:29:LYS:CE    | 2:B:30:LEU:H     | 1.48                     | 1.26              |
| 2:B:123:LEU:HD13 | 2:B:142:LEU:CG   | 1.64                     | 1.26              |

*Continued on next page...*

*Continued from previous page...*

| Atom-1           | Atom-2           | Interatomic distance (Å) | Clash overlap (Å) |
|------------------|------------------|--------------------------|-------------------|
| 2:B:219:TYR:CB   | 2:B:255:TYR:CE1  | 2.16                     | 1.26              |
| 3:M:268:GLY:N    | 3:M:302:TYR:OH   | 1.69                     | 1.26              |
| 2:B:143:SER:C    | 2:B:179:LYS:HD2  | 1.50                     | 1.25              |
| 2:B:566:ALA:C    | 2:B:574:ASN:CB   | 2.04                     | 1.25              |
| 4:S:14:PRO:HA    | 4:S:36:TYR:OH    | 1.33                     | 1.25              |
| 1:A:250:ASN:OD1  | 1:A:285:THR:HG22 | 1.20                     | 1.25              |
| 1:A:633:PHE:CE1  | 2:B:513:TRP:CZ3  | 2.24                     | 1.25              |
| 1:A:96:SER:CA    | 1:A:127:LEU:HD21 | 1.65                     | 1.25              |
| 1:A:204:VAL:CG2  | 1:A:236:LEU:HD21 | 1.64                     | 1.25              |
| 3:M:342:LEU:HD11 | 3:M:411:LEU:CD2  | 1.65                     | 1.25              |
| 1:A:141:VAL:CG1  | 4:S:159:ALA:HB3  | 1.67                     | 1.25              |
| 2:B:219:TYR:CG   | 2:B:226:LEU:HB2  | 1.72                     | 1.25              |
| 2:B:245:GLN:CD   | 2:B:309:LEU:CD1  | 2.05                     | 1.25              |
| 3:M:101:LEU:HA   | 3:M:109:LEU:CD1  | 1.65                     | 1.25              |
| 3:M:224:VAL:H    | 3:M:479:PHE:CB   | 1.50                     | 1.25              |
| 1:A:138:ASN:OD1  | 4:S:158:LYS:HE3  | 1.08                     | 1.25              |
| 2:B:553:ALA:HB2  | 2:B:614:ILE:CD1  | 1.63                     | 1.25              |
| 2:B:556:LEU:HD23 | 2:B:588:ILE:CG1  | 1.66                     | 1.25              |
| 3:M:217:ASP:HB2  | 3:M:470:ALA:O    | 1.33                     | 1.25              |
| 3:M:218:LEU:HA   | 3:M:472:TYR:CD2  | 1.72                     | 1.25              |
| 3:M:241:HIS:O    | 3:M:474:THR:CB   | 1.83                     | 1.25              |
| 3:M:260:LEU:HD23 | 3:M:449:VAL:CG2  | 1.67                     | 1.25              |
| 1:A:102:GLN:HB2  | 4:S:163:THR:CB   | 1.65                     | 1.25              |
| 1:A:399:ASP:O    | 1:A:420:ILE:O    | 1.55                     | 1.25              |
| 1:A:633:PHE:CD2  | 2:B:551:LEU:CA   | 2.07                     | 1.25              |
| 2:B:25:VAL:HG11  | 2:B:36:THR:OG1   | 1.34                     | 1.25              |
| 2:B:225:LEU:HD13 | 2:B:283:TYR:CE1  | 1.70                     | 1.25              |
| 2:B:291:TYR:CE2  | 2:B:294:VAL:HB   | 1.69                     | 1.25              |
| 3:M:254:PRO:HB3  | 3:M:454:ILE:CD1  | 1.65                     | 1.25              |
| 1:A:103:LYS:H    | 4:S:163:THR:CB   | 1.49                     | 1.24              |
| 2:B:219:TYR:CZ   | 2:B:226:LEU:N    | 2.03                     | 1.24              |
| 4:S:53:THR:CG2   | 4:S:67:GLU:O     | 1.85                     | 1.24              |
| 1:A:96:SER:CA    | 1:A:127:LEU:HD11 | 1.66                     | 1.24              |
| 1:A:220:SER:CB   | 4:S:142:ILE:HG22 | 1.65                     | 1.24              |
| 2:B:158:VAL:CG1  | 2:B:177:ILE:HD11 | 1.66                     | 1.24              |
| 2:B:159:LYS:HA   | 2:B:195:ILE:CD1  | 1.67                     | 1.24              |
| 2:B:353:GLN:CG   | 3:M:47:SER:C     | 2.06                     | 1.24              |
| 3:M:272:LEU:CD2  | 3:M:278:ILE:HB   | 1.67                     | 1.24              |
| 2:B:143:SER:O    | 2:B:179:LYS:CD   | 1.85                     | 1.24              |
| 2:B:178:ILE:CG1  | 2:B:214:ALA:C    | 2.05                     | 1.24              |
| 4:S:56:SER:O     | 4:S:60:SER:CB    | 1.86                     | 1.24              |

*Continued on next page...*

*Continued from previous page...*

| Atom-1           | Atom-2           | Interatomic distance (Å) | Clash overlap (Å) |
|------------------|------------------|--------------------------|-------------------|
| 3:M:219:LEU:CB   | 3:M:472:TYR:O    | 1.85                     | 1.24              |
| 3:M:244:VAL:HG13 | 3:M:472:TYR:CE2  | 1.72                     | 1.24              |
| 3:M:449:VAL:CG1  | 3:M:452:ILE:CD1  | 2.14                     | 1.24              |
| 1:A:101:GLN:CG   | 4:S:160:ALA:HB1  | 1.56                     | 1.24              |
| 1:A:513:ARG:CD   | 1:A:550:VAL:HG21 | 1.65                     | 1.24              |
| 1:A:637:GLU:CG   | 2:B:516:GLY:H    | 1.49                     | 1.24              |
| 4:S:48:SER:CB    | 4:S:77:TYR:C     | 2.06                     | 1.24              |
| 1:A:516:ILE:CG2  | 1:A:554:ALA:HB3  | 1.67                     | 1.23              |
| 1:A:631:SER:HB2  | 2:B:557:SER:OG   | 1.23                     | 1.23              |
| 2:B:24:ALA:CB    | 2:B:35:TYR:CZ    | 2.21                     | 1.23              |
| 2:B:37:TYR:HD2   | 2:B:38:TYR:CD1   | 1.55                     | 1.23              |
| 2:B:162:VAL:HG23 | 2:B:195:ILE:CG2  | 1.51                     | 1.23              |
| 2:B:199:LEU:O    | 2:B:201:ALA:N    | 1.71                     | 1.23              |
| 3:M:432:THR:OG1  | 3:M:480:GLN:CG   | 1.86                     | 1.23              |
| 4:S:53:THR:HB    | 4:S:69:ASN:CA    | 1.66                     | 1.23              |
| 2:B:86:VAL:CG1   | 2:B:101:ILE:HG23 | 1.66                     | 1.23              |
| 2:B:223:LEU:CD1  | 2:B:259:TYR:N    | 2.01                     | 1.23              |
| 2:B:584:SER:O    | 2:B:588:ILE:HG22 | 1.08                     | 1.23              |
| 3:M:217:ASP:CB   | 3:M:470:ALA:O    | 1.85                     | 1.23              |
| 4:S:8:PHE:CD1    | 4:S:84:TYR:HB2   | 1.71                     | 1.23              |
| 1:A:147:LEU:HB3  | 1:A:184:ALA:CB   | 1.69                     | 1.23              |
| 1:A:326:GLN:HA   | 1:A:331:ARG:NH2  | 1.54                     | 1.23              |
| 1:A:557:LYS:HE2  | 2:B:606:ASP:N    | 0.92                     | 1.23              |
| 2:B:143:SER:O    | 2:B:179:LYS:HD3  | 1.09                     | 1.23              |
| 2:B:219:TYR:CZ   | 2:B:226:LEU:CB   | 2.01                     | 1.23              |
| 2:B:278:PRO:CB   | 2:B:288:TYR:O    | 1.85                     | 1.23              |
| 3:M:378:ILE:O    | 3:M:413:GLY:HA3  | 1.12                     | 1.23              |
| 4:S:8:PHE:CZ     | 4:S:84:TYR:CB    | 2.16                     | 1.23              |
| 1:A:217:ALA:CB   | 4:S:142:ILE:HD12 | 1.68                     | 1.23              |
| 2:B:261:PRO:CG   | 2:B:292:GLU:N    | 1.98                     | 1.23              |
| 2:B:277:CYS:O    | 2:B:288:TYR:HB3  | 1.06                     | 1.23              |
| 3:M:66:PHE:CB    | 3:M:77:LEU:HD11  | 1.43                     | 1.23              |
| 2:B:212:VAL:CG2  | 2:B:248:LEU:HD21 | 1.69                     | 1.22              |
| 4:S:47:GLN:NE2   | 4:S:79:ASN:N     | 1.86                     | 1.22              |
| 1:A:88:ASN:CB    | 1:A:120:ILE:HD12 | 1.68                     | 1.22              |
| 1:A:212:ILE:HD12 | 4:S:145:ASN:ND2  | 0.91                     | 1.22              |
| 1:A:291:ILE:HG23 | 1:A:318:ARG:CB   | 1.69                     | 1.22              |
| 1:A:609:LEU:HG   | 1:A:628:VAL:CB   | 1.67                     | 1.22              |
| 2:B:216:LYS:CB   | 2:B:251:LEU:CD1  | 2.16                     | 1.22              |
| 2:B:472:VAL:CG1  | 2:B:510:GLY:HA3  | 1.68                     | 1.22              |
| 3:M:214:LEU:C    | 3:M:467:TYR:HB3  | 1.57                     | 1.22              |

*Continued on next page...*

*Continued from previous page...*

| Atom-1           | Atom-2           | Interatomic distance (Å) | Clash overlap (Å) |
|------------------|------------------|--------------------------|-------------------|
| 1:A:563:CYS:CB   | 1:A:621:LEU:HD12 | 1.68                     | 1.22              |
| 2:B:20:ARG:CZ    | 2:B:21:GLU:HG3   | 1.68                     | 1.22              |
| 2:B:219:TYR:CD1  | 2:B:226:LEU:HD13 | 1.74                     | 1.22              |
| 2:B:275:ARG:N    | 2:B:295:ASN:ND2  | 1.87                     | 1.22              |
| 2:B:479:VAL:HG22 | 2:B:486:HIS:CD2  | 1.73                     | 1.22              |
| 3:M:221:THR:OG1  | 3:M:474:THR:O    | 1.56                     | 1.22              |
| 1:A:92:LEU:HD21  | 1:A:120:ILE:O    | 1.38                     | 1.22              |
| 2:B:135:ARG:NH2  | 2:B:164:ASP:OD1  | 1.72                     | 1.22              |
| 2:B:219:TYR:CB   | 2:B:255:TYR:HE1  | 1.52                     | 1.22              |
| 2:B:542:PRO:HA   | 2:B:602:ASP:OD2  | 1.29                     | 1.22              |
| 4:S:48:SER:CB    | 4:S:77:TYR:CB    | 2.18                     | 1.22              |
| 4:S:73:ILE:HG21  | 4:S:88:ILE:CG2   | 1.65                     | 1.22              |
| 1:A:96:SER:CB    | 1:A:127:LEU:CD1  | 2.16                     | 1.21              |
| 2:B:171:GLY:N    | 2:B:207:VAL:HG13 | 1.53                     | 1.21              |
| 2:B:223:LEU:CD2  | 2:B:255:TYR:CE1  | 2.23                     | 1.21              |
| 4:S:131:VAL:CG2  | 4:S:153:VAL:HG22 | 1.69                     | 1.21              |
| 1:A:638:LEU:HB2  | 2:B:516:GLY:O    | 1.36                     | 1.21              |
| 2:B:20:ARG:NE    | 2:B:21:GLU:HB2   | 1.55                     | 1.21              |
| 1:A:217:ALA:CB   | 4:S:142:ILE:CG1  | 2.19                     | 1.21              |
| 1:A:219:VAL:CG1  | 1:A:259:LEU:HD13 | 1.70                     | 1.21              |
| 2:B:231:ARG:HG3  | 2:B:298:ASP:OD1  | 1.39                     | 1.21              |
| 2:B:277:CYS:O    | 2:B:288:TYR:CB   | 1.88                     | 1.21              |
| 2:B:352:ASN:HA   | 3:M:49:ASP:CG    | 1.39                     | 1.21              |
| 3:M:2:TYR:O      | 3:M:81:SER:HB2   | 1.38                     | 1.21              |
| 1:A:105:VAL:CG2  | 4:S:167:ILE:HG23 | 1.69                     | 1.21              |
| 1:A:213:SER:O    | 4:S:143:GLU:CG   | 1.87                     | 1.21              |
| 1:A:219:VAL:O    | 1:A:259:LEU:CD1  | 1.87                     | 1.21              |
| 1:A:557:LYS:NZ   | 2:B:604:GLU:CG   | 1.70                     | 1.21              |
| 2:B:87:VAL:HG13  | 2:B:122:SER:OG   | 1.39                     | 1.21              |
| 4:S:34:GLN:OE1   | 4:S:58:LEU:HD21  | 1.32                     | 1.21              |
| 1:A:101:GLN:HE21 | 4:S:167:ILE:CG2  | 1.53                     | 1.21              |
| 2:B:47:LEU:CD2   | 2:B:66:ILE:CG1   | 2.02                     | 1.21              |
| 2:B:79:VAL:HB    | 2:B:108:PHE:CE1  | 1.74                     | 1.21              |
| 2:B:105:LEU:HB3  | 2:B:145:MET:CE   | 1.71                     | 1.21              |
| 2:B:219:TYR:CD1  | 2:B:226:LEU:CB   | 2.07                     | 1.21              |
| 2:B:290:SER:O    | 2:B:292:GLU:N    | 1.67                     | 1.21              |
| 2:B:219:TYR:HB3  | 2:B:255:TYR:CE1  | 1.76                     | 1.20              |
| 4:S:15:ARG:NH1   | 4:S:122:ILE:HD11 | 1.54                     | 1.20              |
| 1:A:101:GLN:C    | 4:S:167:ILE:HG13 | 1.59                     | 1.20              |
| 1:A:140:VAL:CA   | 1:A:177:ILE:HG12 | 1.70                     | 1.20              |
| 1:A:211:ASP:CG   | 4:S:148:ARG:HD3  | 1.60                     | 1.20              |

*Continued on next page...*

*Continued from previous page...*

| Atom-1           | Atom-2           | Interatomic distance (Å) | Clash overlap (Å) |
|------------------|------------------|--------------------------|-------------------|
| 1:A:557:LYS:HB3  | 2:B:605:PHE:CD2  | 1.76                     | 1.20              |
| 2:B:124:GLN:HA   | 2:B:157:THR:OG1  | 1.38                     | 1.20              |
| 2:B:344:VAL:HG13 | 2:B:381:PHE:CZ   | 1.76                     | 1.20              |
| 2:B:531:ARG:HA   | 2:B:591:MET:SD   | 1.80                     | 1.20              |
| 3:M:319:SER:CB   | 3:M:346:ASN:CB   | 2.18                     | 1.20              |
| 1:A:125:THR:OG1  | 1:A:158:LEU:HD13 | 1.38                     | 1.20              |
| 1:A:388:VAL:HG13 | 1:A:432:ILE:CD1  | 1.70                     | 1.20              |
| 2:B:37:TYR:CD2   | 2:B:38:TYR:CD1   | 2.28                     | 1.20              |
| 2:B:127:LEU:CB   | 2:B:157:THR:CG2  | 2.19                     | 1.20              |
| 4:S:34:GLN:OE1   | 4:S:58:LEU:HD11  | 1.35                     | 1.20              |
| 2:B:219:TYR:CE1  | 2:B:226:LEU:CG   | 2.22                     | 1.20              |
| 2:B:278:PRO:HA   | 2:B:288:TYR:CA   | 1.69                     | 1.20              |
| 3:M:222:PHE:CD1  | 3:M:240:ILE:HG23 | 1.75                     | 1.20              |
| 1:A:96:SER:N     | 1:A:127:LEU:HD21 | 0.89                     | 1.20              |
| 2:B:162:VAL:CB   | 2:B:195:ILE:HG23 | 1.72                     | 1.20              |
| 2:B:245:GLN:CD   | 2:B:309:LEU:HD11 | 1.56                     | 1.20              |
| 2:B:261:PRO:CA   | 2:B:290:SER:HB3  | 1.49                     | 1.20              |
| 1:A:211:ASP:OD1  | 4:S:148:ARG:HD3  | 1.02                     | 1.19              |
| 1:A:316:LEU:CD1  | 1:A:348:PHE:CD2  | 2.26                     | 1.19              |
| 1:A:594:PHE:CB   | 2:B:473:ASN:HB2  | 1.72                     | 1.19              |
| 2:B:62:ALA:O     | 2:B:66:ILE:HG13  | 1.21                     | 1.19              |
| 2:B:219:TYR:CE2  | 2:B:226:LEU:HB2  | 1.75                     | 1.19              |
| 2:B:513:TRP:CA   | 2:B:551:LEU:CD2  | 2.20                     | 1.19              |
| 3:M:243:ILE:H    | 3:M:474:THR:CG2  | 1.53                     | 1.19              |
| 4:S:47:GLN:NE2   | 4:S:79:ASN:H     | 1.38                     | 1.19              |
| 1:A:559:PHE:CE1  | 1:A:581:LEU:HD22 | 1.76                     | 1.19              |
| 1:A:631:SER:HA   | 2:B:557:SER:CB   | 1.71                     | 1.19              |
| 2:B:25:VAL:HG23  | 2:B:35:TYR:CD2   | 1.77                     | 1.19              |
| 2:B:267:ASP:N    | 2:B:289:PRO:CB   | 2.00                     | 1.19              |
| 2:B:278:PRO:HG2  | 2:B:292:GLU:OE1  | 1.41                     | 1.19              |
| 2:B:291:TYR:CD2  | 2:B:294:VAL:HG12 | 1.61                     | 1.19              |
| 3:M:9:ASP:C      | 3:M:75:TRP:CD1   | 2.16                     | 1.19              |
| 3:M:340:LEU:O    | 3:M:411:LEU:HB3  | 1.39                     | 1.19              |
| 1:A:102:GLN:CB   | 4:S:166:LYS:HB2  | 1.71                     | 1.19              |
| 2:B:197:LYS:O    | 2:B:199:LEU:N    | 1.74                     | 1.19              |
| 2:B:279:LEU:N    | 2:B:288:TYR:CB   | 2.02                     | 1.19              |
| 2:B:513:TRP:CA   | 2:B:551:LEU:HD13 | 1.66                     | 1.19              |
| 1:A:217:ALA:HB2  | 4:S:143:GLU:HG3  | 1.23                     | 1.19              |
| 2:B:291:TYR:CD2  | 2:B:294:VAL:HG11 | 1.68                     | 1.19              |
| 2:B:311:TYR:CE2  | 2:B:342:ALA:CB   | 2.17                     | 1.19              |
| 2:B:393:ILE:HG23 | 2:B:431:MET:CG   | 1.71                     | 1.19              |

*Continued on next page...*



*Continued from previous page...*

| Atom-1           | Atom-2           | Interatomic distance (Å) | Clash overlap (Å) |
|------------------|------------------|--------------------------|-------------------|
| 2:B:546:CYS:CA   | 2:B:607:ILE:HG23 | 1.72                     | 1.19              |
| 3:M:246:VAL:HB   | 3:M:297:PHE:CZ   | 1.75                     | 1.19              |
| 1:A:185:LEU:HD12 | 1:A:203:PHE:CE1  | 1.74                     | 1.19              |
| 1:A:605:GLU:CG   | 1:A:632:PHE:CD2  | 2.26                     | 1.19              |
| 2:B:108:PHE:CE2  | 2:B:115:LEU:HB2  | 1.78                     | 1.19              |
| 2:B:151:ALA:O    | 2:B:188:TYR:CE2  | 1.85                     | 1.19              |
| 2:B:223:LEU:HD22 | 2:B:255:TYR:CE1  | 1.78                     | 1.19              |
| 2:B:582:ASP:O    | 2:B:584:SER:HB3  | 1.43                     | 1.19              |
| 1:A:101:GLN:CG   | 4:S:167:ILE:HG21 | 1.72                     | 1.18              |
| 1:A:179:LYS:HE3  | 4:S:143:GLU:CB   | 1.73                     | 1.18              |
| 2:B:223:LEU:CD1  | 2:B:259:TYR:HA   | 1.57                     | 1.18              |
| 1:A:502:ASP:OD2  | 1:A:506:LYS:NZ   | 1.72                     | 1.18              |
| 1:A:275:LEU:HD21 | 1:A:311:THR:OG1  | 1.41                     | 1.18              |
| 2:B:25:VAL:CG1   | 2:B:36:THR:OG1   | 1.92                     | 1.18              |
| 2:B:225:LEU:CD1  | 2:B:283:TYR:OH   | 1.91                     | 1.18              |
| 2:B:267:ASP:N    | 2:B:289:PRO:HB3  | 1.53                     | 1.18              |
| 2:B:277:CYS:SG   | 2:B:292:GLU:HG3  | 1.83                     | 1.18              |
| 2:B:303:LEU:CD1  | 2:B:333:GLN:CB   | 2.22                     | 1.18              |
| 2:B:531:ARG:CA   | 2:B:591:MET:SD   | 2.31                     | 1.18              |
| 3:M:66:PHE:CB    | 3:M:77:LEU:CD1   | 2.21                     | 1.18              |
| 3:M:319:SER:OG   | 3:M:346:ASN:CB   | 1.92                     | 1.18              |
| 4:S:135:ILE:O    | 4:S:141:VAL:HA   | 1.40                     | 1.18              |
| 2:B:422:ALA:CB   | 2:B:424:PHE:CE1  | 2.26                     | 1.18              |
| 3:M:338:PHE:CD2  | 3:M:415:ILE:HG13 | 1.78                     | 1.18              |
| 1:A:103:LYS:O    | 1:A:107:TYR:CD1  | 1.97                     | 1.18              |
| 2:B:98:LYS:NZ    | 2:B:134:LEU:HB3  | 1.58                     | 1.18              |
| 4:S:130:SER:OG   | 4:S:156:LEU:CD1  | 1.89                     | 1.18              |
| 2:B:12:LEU:O     | 2:B:16:LYS:HB2   | 1.42                     | 1.17              |
| 2:B:56:SER:CB    | 2:B:92:THR:HG21  | 1.74                     | 1.17              |
| 2:B:315:PRO:HB3  | 2:B:355:ASN:ND2  | 1.58                     | 1.17              |
| 2:B:567:GLN:O    | 2:B:569:THR:OG1  | 1.54                     | 1.17              |
| 2:B:47:LEU:HD22  | 2:B:66:ILE:HG12  | 1.20                     | 1.17              |
| 2:B:170:ARG:HH12 | 2:B:198:GLU:CG   | 1.57                     | 1.17              |
| 3:M:244:VAL:HA   | 3:M:472:TYR:CE2  | 1.77                     | 1.17              |
| 1:A:102:GLN:HB3  | 4:S:166:LYS:CB   | 1.74                     | 1.17              |
| 1:A:166:LEU:CD1  | 1:A:185:LEU:HD23 | 1.73                     | 1.17              |
| 1:A:631:SER:CA   | 2:B:557:SER:CB   | 2.21                     | 1.17              |
| 2:B:352:ASN:CA   | 3:M:49:ASP:CG    | 2.10                     | 1.17              |
| 3:M:222:PHE:C    | 3:M:479:PHE:CZ   | 2.18                     | 1.17              |
| 1:A:253:ILE:HD11 | 1:A:281:LEU:HD22 | 1.20                     | 1.17              |
| 1:A:399:ASP:CA   | 1:A:420:ILE:HB   | 1.74                     | 1.17              |

*Continued on next page...*

*Continued from previous page...*

| Atom-1           | Atom-2           | Interatomic distance (Å) | Clash overlap (Å) |
|------------------|------------------|--------------------------|-------------------|
| 1:A:595:GLU:CG   | 2:B:469:ASP:CB   | 2.14                     | 1.17              |
| 2:B:171:GLY:HA3  | 2:B:207:VAL:CG1  | 1.70                     | 1.17              |
| 2:B:252:LEU:HB2  | 2:B:302:PHE:CZ   | 1.78                     | 1.17              |
| 2:B:360:LEU:CD1  | 2:B:391:ALA:HA   | 1.73                     | 1.17              |
| 1:A:71:VAL:CG1   | 1:A:105:VAL:HG12 | 1.71                     | 1.17              |
| 2:B:278:PRO:CD   | 2:B:292:GLU:OE1  | 1.91                     | 1.17              |
| 2:B:523:PHE:HZ   | 2:B:580:TYR:CE2  | 1.63                     | 1.17              |
| 2:B:545:ARG:HD3  | 2:B:602:ASP:HB2  | 1.25                     | 1.17              |
| 3:M:226:PHE:HB2  | 3:M:481:VAL:HG22 | 1.17                     | 1.17              |
| 3:M:336:ASP:OD1  | 3:M:415:ILE:O    | 1.62                     | 1.17              |
| 1:A:105:VAL:N    | 4:S:167:ILE:HD11 | 1.53                     | 1.16              |
| 1:A:185:LEU:HD13 | 1:A:203:PHE:CE1  | 1.71                     | 1.16              |
| 1:A:557:LYS:HD3  | 2:B:605:PHE:HB3  | 1.24                     | 1.16              |
| 1:A:631:SER:HA   | 2:B:557:SER:HB3  | 1.24                     | 1.16              |
| 3:M:260:LEU:CD2  | 3:M:449:VAL:CG2  | 2.20                     | 1.16              |
| 1:A:99:LYS:HD3   | 4:S:164:ASP:H    | 1.06                     | 1.16              |
| 1:A:107:TYR:CD2  | 1:A:128:LEU:HD21 | 1.80                     | 1.16              |
| 2:B:479:VAL:CG2  | 2:B:486:HIS:CD2  | 2.29                     | 1.16              |
| 3:M:339:GLU:CD   | 3:M:412:ARG:NE   | 1.98                     | 1.16              |
| 2:B:83:PHE:HE2   | 2:B:119:SER:CA   | 1.58                     | 1.16              |
| 2:B:216:LYS:CG   | 2:B:251:LEU:HD13 | 1.76                     | 1.16              |
| 2:B:497:LEU:HD23 | 2:B:533:LEU:CD2  | 1.75                     | 1.16              |
| 3:M:215:TYR:CD1  | 3:M:468:LYS:CA   | 2.27                     | 1.16              |
| 3:M:339:GLU:HG3  | 3:M:412:ARG:CD   | 1.74                     | 1.16              |
| 4:S:47:GLN:CD    | 4:S:79:ASN:N     | 1.97                     | 1.16              |
| 1:A:147:LEU:CD2  | 1:A:166:LEU:CD2  | 2.23                     | 1.16              |
| 1:A:219:VAL:HG21 | 1:A:256:LEU:HD21 | 1.22                     | 1.16              |
| 2:B:105:LEU:HB3  | 2:B:145:MET:HE3  | 1.22                     | 1.16              |
| 3:M:219:LEU:HD13 | 3:M:472:TYR:O    | 1.45                     | 1.16              |
| 4:S:80:TYR:O     | 4:S:82:THR:N     | 1.78                     | 1.16              |
| 1:A:103:LYS:CE   | 1:A:131:ASP:OD1  | 1.94                     | 1.16              |
| 1:A:213:SER:O    | 4:S:143:GLU:HG2  | 0.99                     | 1.16              |
| 1:A:216:SER:HB3  | 4:S:143:GLU:HA   | 1.18                     | 1.16              |
| 2:B:175:LEU:CG   | 2:B:210:CYS:HB3  | 1.75                     | 1.16              |
| 2:B:275:ARG:CG   | 2:B:294:VAL:CG1  | 2.16                     | 1.16              |
| 2:B:275:ARG:N    | 2:B:295:ASN:HD21 | 1.41                     | 1.16              |
| 3:M:219:LEU:CD1  | 3:M:472:TYR:O    | 1.94                     | 1.16              |
| 1:A:217:ALA:O    | 4:S:142:ILE:HB   | 1.43                     | 1.15              |
| 1:A:421:PRO:HG2  | 1:A:424:TYR:CE1  | 1.81                     | 1.15              |
| 3:M:92:PHE:CZ    | 3:M:129:VAL:HG22 | 1.79                     | 1.15              |
| 3:M:379:LEU:CD2  | 3:M:386:PHE:CD1  | 2.28                     | 1.15              |

*Continued on next page...*

*Continued from previous page...*

| Atom-1           | Atom-2           | Interatomic distance (Å) | Clash overlap (Å) |
|------------------|------------------|--------------------------|-------------------|
| 1:A:219:VAL:C    | 1:A:259:LEU:CD1  | 2.13                     | 1.15              |
| 2:B:219:TYR:CZ   | 2:B:226:LEU:HA   | 1.78                     | 1.15              |
| 2:B:556:LEU:CD2  | 2:B:588:ILE:CG1  | 2.24                     | 1.15              |
| 4:S:53:THR:HG21  | 4:S:67:GLU:O     | 1.44                     | 1.15              |
| 1:A:103:LYS:H    | 4:S:163:THR:CG2  | 1.57                     | 1.15              |
| 1:A:104:ARG:HA   | 1:A:145:ILE:HG21 | 1.22                     | 1.15              |
| 1:A:147:LEU:CD2  | 1:A:166:LEU:HD23 | 1.77                     | 1.15              |
| 2:B:80:GLN:HG2   | 2:B:115:LEU:HD11 | 1.18                     | 1.15              |
| 2:B:151:ALA:HA   | 2:B:180:LEU:CD1  | 1.74                     | 1.15              |
| 2:B:275:ARG:HG3  | 2:B:291:TYR:CD2  | 1.79                     | 1.15              |
| 2:B:393:ILE:CG2  | 2:B:431:MET:CG   | 2.23                     | 1.15              |
| 3:M:319:SER:HB3  | 3:M:346:ASN:CB   | 1.74                     | 1.15              |
| 3:M:338:PHE:CE2  | 3:M:415:ILE:HG13 | 1.81                     | 1.15              |
| 4:S:34:GLN:OE1   | 4:S:58:LEU:CD2   | 1.93                     | 1.15              |
| 1:A:163:ALA:CB   | 1:A:195:ALA:HB1  | 1.76                     | 1.15              |
| 1:A:630:PRO:CB   | 2:B:614:ILE:HG12 | 1.75                     | 1.15              |
| 2:B:162:VAL:CG2  | 2:B:195:ILE:HG22 | 1.76                     | 1.15              |
| 2:B:223:LEU:HD12 | 2:B:259:TYR:CA   | 1.64                     | 1.15              |
| 2:B:230:PHE:CD2  | 2:B:298:ASP:HB3  | 1.81                     | 1.15              |
| 3:M:443:SER:OG   | 3:M:447:ILE:C    | 1.84                     | 1.15              |
| 1:A:102:GLN:HB2  | 4:S:163:THR:CA   | 1.77                     | 1.15              |
| 1:A:147:LEU:HD12 | 1:A:181:ALA:HA   | 1.29                     | 1.15              |
| 1:A:219:VAL:HG13 | 1:A:259:LEU:HD13 | 1.24                     | 1.15              |
| 1:A:450:TYR:OH   | 1:A:476:GLN:HG2  | 1.34                     | 1.15              |
| 1:A:450:TYR:OH   | 1:A:476:GLN:HG3  | 1.42                     | 1.15              |
| 2:B:132:SER:HA   | 2:B:169:VAL:HG21 | 1.20                     | 1.15              |
| 1:A:630:PRO:HG2  | 2:B:614:ILE:HA   | 1.22                     | 1.14              |
| 1:A:634:ASN:O    | 2:B:516:GLY:C    | 1.86                     | 1.14              |
| 2:B:158:VAL:CG1  | 2:B:177:ILE:CD1  | 2.17                     | 1.14              |
| 2:B:353:GLN:CG   | 3:M:49:ASP:H     | 1.59                     | 1.14              |
| 2:B:513:TRP:HA   | 2:B:551:LEU:CG   | 1.76                     | 1.14              |
| 1:A:92:LEU:HD11  | 1:A:120:ILE:HA   | 1.20                     | 1.14              |
| 1:A:140:VAL:N    | 1:A:177:ILE:HD11 | 1.61                     | 1.14              |
| 1:A:288:THR:OG1  | 1:A:291:ILE:HB   | 1.43                     | 1.14              |
| 1:A:609:LEU:CG   | 1:A:628:VAL:HB   | 1.78                     | 1.14              |
| 3:M:217:ASP:CG   | 3:M:471:LYS:HA   | 1.67                     | 1.14              |
| 3:M:340:LEU:O    | 3:M:411:LEU:CB   | 1.92                     | 1.14              |
| 1:A:101:GLN:HE21 | 4:S:167:ILE:HG22 | 1.10                     | 1.14              |
| 1:A:629:LEU:HD11 | 2:B:610:ARG:CZ   | 1.77                     | 1.14              |
| 2:B:2:VAL:HG12   | 2:B:6:HIS:CE1    | 1.82                     | 1.14              |
| 2:B:154:ILE:HD12 | 2:B:180:LEU:CD1  | 1.78                     | 1.14              |

*Continued on next page...*

*Continued from previous page...*

| Atom-1           | Atom-2           | Interatomic distance (Å) | Clash overlap (Å) |
|------------------|------------------|--------------------------|-------------------|
| 2:B:523:PHE:CE1  | 2:B:580:TYR:HD2  | 1.66                     | 1.14              |
| 1:A:251:TRP:HH2  | 4:S:103:GLN:OE1  | 1.27                     | 1.14              |
| 1:A:275:LEU:O    | 1:A:276:PRO:C    | 1.73                     | 1.14              |
| 1:A:555:LEU:HD13 | 1:A:581:LEU:HD11 | 1.21                     | 1.14              |
| 1:A:609:LEU:CD2  | 1:A:628:VAL:HG21 | 1.78                     | 1.14              |
| 2:B:127:LEU:CD2  | 2:B:161:LEU:CD2  | 2.06                     | 1.14              |
| 2:B:127:LEU:HD22 | 2:B:161:LEU:HD22 | 1.24                     | 1.14              |
| 1:A:67:LYS:H     | 4:S:165:SER:HB2  | 1.00                     | 1.14              |
| 1:A:176:TYR:HB3  | 4:S:155:GLU:HG3  | 1.28                     | 1.14              |
| 1:A:638:LEU:HD12 | 2:B:518:ILE:CG2  | 1.78                     | 1.14              |
| 2:B:260:LEU:CA   | 2:B:291:TYR:CE1  | 2.21                     | 1.14              |
| 2:B:556:LEU:HD22 | 2:B:588:ILE:HG12 | 1.16                     | 1.14              |
| 3:M:343:ASN:HA   | 3:M:408:VAL:HG13 | 1.21                     | 1.14              |
| 1:A:178:ARG:HD3  | 1:A:209:ASP:OD2  | 1.48                     | 1.13              |
| 1:A:217:ALA:CB   | 4:S:142:ILE:CD1  | 2.24                     | 1.13              |
| 2:B:79:VAL:HG23  | 2:B:108:PHE:CZ   | 1.82                     | 1.13              |
| 2:B:196:LEU:HB2  | 2:B:229:HIS:CE1  | 1.83                     | 1.13              |
| 4:S:7:ILE:HG21   | 4:S:121:LEU:HD21 | 1.26                     | 1.13              |
| 1:A:262:ASN:O    | 1:A:265:GLN:O    | 1.65                     | 1.13              |
| 1:A:399:ASP:HA   | 1:A:420:ILE:CB   | 1.77                     | 1.13              |
| 1:A:631:SER:O    | 2:B:554:LYS:HG3  | 1.49                     | 1.13              |
| 2:B:219:TYR:CD1  | 2:B:226:LEU:CD1  | 2.27                     | 1.13              |
| 2:B:275:ARG:HB3  | 2:B:291:TYR:HB3  | 1.19                     | 1.13              |
| 2:B:400:SER:HB2  | 2:B:439:CYS:SG   | 1.87                     | 1.13              |
| 3:M:283:PHE:CE2  | 3:M:289:THR:CB   | 2.31                     | 1.13              |
| 3:M:319:SER:OG   | 3:M:346:ASN:HB2  | 0.99                     | 1.13              |
| 1:A:637:GLU:HG2  | 2:B:516:GLY:H    | 1.11                     | 1.13              |
| 2:B:197:LYS:CA   | 2:B:229:HIS:NE2  | 2.11                     | 1.13              |
| 2:B:260:LEU:HD22 | 2:B:291:TYR:CZ   | 1.83                     | 1.13              |
| 2:B:563:PHE:CD2  | 2:B:584:SER:CB   | 2.32                     | 1.13              |
| 3:M:125:PHE:O    | 3:M:129:VAL:HG23 | 0.98                     | 1.13              |
| 3:M:224:VAL:N    | 3:M:479:PHE:CG   | 2.15                     | 1.13              |
| 3:M:323:MET:SD   | 3:M:342:LEU:HG   | 1.88                     | 1.13              |
| 4:S:5:VAL:CG2    | 4:S:132:LEU:CD2  | 2.00                     | 1.13              |
| 4:S:34:GLN:OE1   | 4:S:58:LEU:CD1   | 1.95                     | 1.13              |
| 1:A:253:ILE:HD13 | 1:A:281:LEU:HB3  | 1.25                     | 1.13              |
| 1:A:595:GLU:HG3  | 2:B:469:ASP:CA   | 1.61                     | 1.13              |
| 2:B:108:PHE:CE2  | 2:B:115:LEU:CB   | 2.30                     | 1.13              |
| 2:B:513:TRP:CA   | 2:B:551:LEU:HD22 | 1.77                     | 1.13              |
| 2:B:123:LEU:O    | 2:B:127:LEU:HG   | 1.48                     | 1.12              |
| 2:B:566:ALA:CA   | 2:B:574:ASN:CB   | 2.21                     | 1.13              |

*Continued on next page...*

*Continued from previous page...*

| Atom-1           | Atom-2           | Interatomic distance (Å) | Clash overlap (Å) |
|------------------|------------------|--------------------------|-------------------|
| 2:B:584:SER:O    | 2:B:588:ILE:CG2  | 1.97                     | 1.13              |
| 2:B:139:LEU:CD2  | 2:B:173:VAL:CA   | 1.95                     | 1.12              |
| 2:B:200:MET:HG2  | 2:B:232:ARG:HB3  | 1.23                     | 1.12              |
| 2:B:527:PRO:CB   | 2:B:587:ARG:CG   | 2.27                     | 1.12              |
| 2:B:559:ASP:HB2  | 2:B:563:PHE:CE1  | 1.83                     | 1.12              |
| 1:A:244:LEU:HD13 | 1:A:256:LEU:CD1  | 1.79                     | 1.12              |
| 1:A:252:ILE:CA   | 4:S:144:THR:OG1  | 1.96                     | 1.12              |
| 2:B:174:ALA:CB   | 2:B:211:ALA:HA   | 1.79                     | 1.12              |
| 2:B:178:ILE:O    | 2:B:180:LEU:N    | 1.83                     | 1.12              |
| 2:B:181:TYR:CD2  | 2:B:218:CYS:C    | 2.15                     | 1.12              |
| 2:B:212:VAL:O    | 2:B:214:ALA:N    | 1.82                     | 1.12              |
| 2:B:461:HIS:O    | 2:B:462:ASN:C    | 1.74                     | 1.12              |
| 2:B:537:PHE:CZ   | 2:B:545:ARG:HG2  | 1.84                     | 1.12              |
| 3:M:18:TYR:CD1   | 3:M:122:SER:CA   | 2.30                     | 1.12              |
| 4:S:48:SER:CB    | 4:S:77:TYR:O     | 1.96                     | 1.12              |
| 1:A:74:LEU:HD22  | 1:A:87:CYS:SG    | 1.90                     | 1.12              |
| 1:A:219:VAL:HG11 | 1:A:256:LEU:HD23 | 1.31                     | 1.12              |
| 1:A:225:LEU:HD13 | 1:A:233:PHE:CZ   | 1.83                     | 1.12              |
| 1:A:255:ARG:HH22 | 4:S:135:ILE:CG2  | 1.58                     | 1.12              |
| 2:B:418:TYR:OH   | 2:B:432:ALA:CB   | 1.96                     | 1.12              |
| 2:B:483:PRO:HB3  | 2:B:521:ILE:CG2  | 1.79                     | 1.12              |
| 3:M:342:LEU:CD1  | 3:M:411:LEU:HB2  | 1.78                     | 1.12              |
| 1:A:141:VAL:C    | 4:S:159:ALA:HB2  | 1.70                     | 1.12              |
| 1:A:215:VAL:HG22 | 1:A:243:ILE:HD12 | 1.23                     | 1.12              |
| 1:A:225:LEU:CD1  | 1:A:233:PHE:CZ   | 2.31                     | 1.12              |
| 2:B:230:PHE:CE1  | 2:B:252:LEU:CD2  | 2.24                     | 1.12              |
| 2:B:393:ILE:HG22 | 2:B:431:MET:HG2  | 1.23                     | 1.12              |
| 2:B:563:PHE:HD2  | 2:B:584:SER:HB2  | 1.05                     | 1.12              |
| 1:A:182:ILE:CG2  | 1:A:221:VAL:HG21 | 1.79                     | 1.12              |
| 1:A:637:GLU:CG   | 2:B:516:GLY:N    | 2.12                     | 1.12              |
| 2:B:25:VAL:CG2   | 2:B:35:TYR:HD2   | 1.61                     | 1.12              |
| 2:B:336:ASN:O    | 2:B:337:THR:HB   | 1.50                     | 1.12              |
| 2:B:353:GLN:CD   | 3:M:47:SER:CB    | 2.18                     | 1.12              |
| 2:B:549:LEU:HD11 | 2:B:611:ALA:CA   | 1.78                     | 1.12              |
| 3:M:243:ILE:N    | 3:M:474:THR:HG22 | 1.64                     | 1.12              |
| 3:M:272:LEU:HD22 | 3:M:278:ILE:HB   | 1.20                     | 1.12              |
| 1:A:128:LEU:HD12 | 1:A:150:LEU:HD21 | 1.21                     | 1.11              |
| 1:A:251:TRP:CZ2  | 4:S:103:GLN:CB   | 2.32                     | 1.11              |
| 2:B:127:LEU:CG   | 2:B:157:THR:HG21 | 1.78                     | 1.11              |
| 2:B:178:ILE:CG1  | 2:B:215:TYR:N    | 2.13                     | 1.11              |
| 2:B:353:GLN:HG2  | 3:M:49:ASP:N     | 1.64                     | 1.11              |

*Continued on next page...*

*Continued from previous page...*

| Atom-1           | Atom-2           | Interatomic distance (Å) | Clash overlap (Å) |
|------------------|------------------|--------------------------|-------------------|
| 2:B:437:SER:HA   | 2:B:478:LEU:HD21 | 1.14                     | 1.11              |
| 2:B:549:LEU:CD1  | 2:B:611:ALA:CB   | 2.27                     | 1.11              |
| 3:M:223:HIS:CA   | 3:M:479:PHE:CD2  | 2.33                     | 1.11              |
| 3:M:265:ASN:OD1  | 3:M:313:SER:OG   | 1.67                     | 1.11              |
| 3:M:432:THR:OG1  | 3:M:480:GLN:HG3  | 0.94                     | 1.11              |
| 4:S:53:THR:O     | 4:S:69:ASN:CB    | 1.97                     | 1.11              |
| 1:A:99:LYS:NZ    | 4:S:164:ASP:HB2  | 1.65                     | 1.11              |
| 2:B:144:ASP:HA   | 2:B:179:LYS:NZ   | 1.63                     | 1.11              |
| 2:B:219:TYR:CD2  | 2:B:226:LEU:HB2  | 1.84                     | 1.11              |
| 2:B:234:CYS:O    | 2:B:237:ILE:HG22 | 1.49                     | 1.11              |
| 3:M:45:SER:HB2   | 3:M:51:LEU:HD11  | 1.18                     | 1.11              |
| 1:A:102:GLN:HB2  | 4:S:163:THR:HB   | 1.15                     | 1.11              |
| 1:A:217:ALA:HB1  | 4:S:142:ILE:CG1  | 1.81                     | 1.11              |
| 1:A:403:LEU:HD22 | 1:A:422:GLU:HG3  | 1.16                     | 1.11              |
| 2:B:352:ASN:HB3  | 3:M:49:ASP:OD2   | 1.42                     | 1.11              |
| 2:B:472:VAL:CG1  | 2:B:510:GLY:CA   | 2.25                     | 1.11              |
| 2:B:483:PRO:CB   | 2:B:521:ILE:HG21 | 1.81                     | 1.11              |
| 3:M:18:TYR:CD1   | 3:M:122:SER:HA   | 1.66                     | 1.11              |
| 4:S:73:ILE:HG23  | 4:S:88:ILE:CG2   | 1.77                     | 1.11              |
| 2:B:219:TYR:CG   | 2:B:226:LEU:HD22 | 1.83                     | 1.11              |
| 2:B:319:LEU:HD11 | 2:B:358:MET:CG   | 1.70                     | 1.11              |
| 3:M:219:LEU:HD22 | 3:M:473:LYS:HA   | 1.13                     | 1.11              |
| 1:A:103:LYS:CB   | 4:S:163:THR:HG21 | 1.80                     | 1.11              |
| 1:A:204:VAL:HG22 | 1:A:236:LEU:HD21 | 1.18                     | 1.11              |
| 2:B:24:ALA:CB    | 2:B:35:TYR:CE2   | 2.32                     | 1.11              |
| 2:B:106:LEU:HD12 | 2:B:144:ASP:O    | 1.43                     | 1.11              |
| 2:B:307:ASN:ND2  | 2:B:336:ASN:ND2  | 1.98                     | 1.11              |
| 2:B:334:MET:HA   | 2:B:334:MET:HE2  | 1.30                     | 1.11              |
| 1:A:408:ILE:CG2  | 4:S:64:ASN:CA    | 2.28                     | 1.10              |
| 2:B:37:TYR:HH    | 2:B:46:GLN:CD    | 1.47                     | 1.10              |
| 2:B:121:ASN:OD1  | 2:B:153:ILE:CD1  | 1.97                     | 1.10              |
| 2:B:127:LEU:HB3  | 2:B:161:LEU:CD1  | 1.80                     | 1.10              |
| 2:B:343:LEU:HD22 | 2:B:362:ALA:CB   | 1.80                     | 1.10              |
| 3:M:319:SER:HB3  | 3:M:346:ASN:CA   | 1.79                     | 1.10              |
| 4:S:53:THR:C     | 4:S:69:ASN:CB    | 2.18                     | 1.10              |
| 4:S:53:THR:CB    | 4:S:68:VAL:C     | 2.18                     | 1.10              |
| 1:A:163:ALA:HB2  | 1:A:195:ALA:CB   | 1.80                     | 1.10              |
| 2:B:25:VAL:HG23  | 2:B:35:TYR:HD2   | 0.94                     | 1.10              |
| 2:B:37:TYR:CD2   | 2:B:38:TYR:HD1   | 1.65                     | 1.10              |
| 2:B:212:VAL:HG22 | 2:B:248:LEU:HD21 | 1.30                     | 1.10              |
| 3:M:221:THR:HB   | 3:M:474:THR:O    | 1.50                     | 1.10              |

*Continued on next page...*

*Continued from previous page...*

| Atom-1           | Atom-2           | Interatomic distance (Å) | Clash overlap (Å) |
|------------------|------------------|--------------------------|-------------------|
| 1:A:101:GLN:HG2  | 4:S:167:ILE:HG21 | 1.32                     | 1.10              |
| 1:A:102:GLN:CB   | 4:S:163:THR:HB   | 1.72                     | 1.10              |
| 2:B:231:ARG:CG   | 2:B:298:ASP:OD1  | 1.98                     | 1.10              |
| 2:B:267:ASP:HB3  | 2:B:289:PRO:HD3  | 1.31                     | 1.10              |
| 2:B:497:LEU:HD11 | 2:B:508:ARG:NH1  | 1.67                     | 1.10              |
| 2:B:549:LEU:HD21 | 2:B:611:ALA:N    | 0.78                     | 1.10              |
| 1:A:631:SER:HB3  | 2:B:557:SER:OG   | 1.45                     | 1.10              |
| 2:B:227:HIS:CD2  | 2:B:292:GLU:OE2  | 2.05                     | 1.10              |
| 3:M:317:MET:CB   | 3:M:320:ILE:O    | 1.98                     | 1.10              |
| 3:M:339:GLU:HG3  | 3:M:412:ARG:HG2  | 1.16                     | 1.10              |
| 4:S:5:VAL:CB     | 4:S:132:LEU:CD2  | 2.29                     | 1.10              |
| 4:S:9:ASN:HD21   | 4:S:13:GLN:CG    | 1.64                     | 1.10              |
| 1:A:204:VAL:CG2  | 1:A:236:LEU:CD2  | 2.26                     | 1.10              |
| 1:A:408:ILE:HG23 | 4:S:64:ASN:CA    | 1.82                     | 1.10              |
| 2:B:2:VAL:HG12   | 2:B:6:HIS:CD2    | 1.86                     | 1.10              |
| 2:B:25:VAL:HG21  | 2:B:36:THR:OG1   | 1.51                     | 1.10              |
| 2:B:127:LEU:CG   | 2:B:157:THR:CG2  | 2.27                     | 1.10              |
| 2:B:139:LEU:HD21 | 2:B:173:VAL:O    | 1.49                     | 1.10              |
| 2:B:162:VAL:HG21 | 2:B:195:ILE:CG2  | 1.62                     | 1.10              |
| 2:B:512:VAL:HG11 | 2:B:548:ILE:HA   | 1.17                     | 1.10              |
| 3:M:217:ASP:HB3  | 3:M:470:ALA:C    | 1.67                     | 1.10              |
| 1:A:253:ILE:HG12 | 1:A:281:LEU:CD1  | 1.80                     | 1.09              |
| 1:A:520:GLY:HA3  | 1:A:558:VAL:CG2  | 1.81                     | 1.09              |
| 2:B:212:VAL:O    | 2:B:213:LEU:C    | 1.83                     | 1.09              |
| 3:M:101:LEU:HA   | 3:M:109:LEU:HD11 | 1.23                     | 1.09              |
| 1:A:488:ARG:HG2  | 1:A:522:PHE:CE2  | 1.88                     | 1.09              |
| 1:A:637:GLU:OE1  | 2:B:513:TRP:CD1  | 2.06                     | 1.09              |
| 2:B:98:LYS:HZ1   | 2:B:134:LEU:CB   | 1.63                     | 1.09              |
| 2:B:108:PHE:CZ   | 2:B:115:LEU:CG   | 2.34                     | 1.09              |
| 2:B:170:ARG:CA   | 2:B:199:LEU:HD22 | 1.82                     | 1.09              |
| 2:B:178:ILE:HA   | 2:B:218:CYS:HB2  | 1.28                     | 1.09              |
| 2:B:208:ILE:HD13 | 2:B:236:ILE:HG23 | 1.17                     | 1.09              |
| 2:B:343:LEU:CD1  | 2:B:359:LEU:HD13 | 1.80                     | 1.09              |
| 2:B:353:GLN:HG2  | 3:M:49:ASP:H     | 1.06                     | 1.09              |
| 3:M:92:PHE:HZ    | 3:M:129:VAL:HG22 | 0.98                     | 1.09              |
| 1:A:142:LYS:N    | 4:S:159:ALA:CB   | 2.16                     | 1.09              |
| 1:A:254:ILE:HG23 | 1:A:293:GLU:HG2  | 1.32                     | 1.09              |
| 2:B:20:ARG:HD2   | 2:B:21:GLU:CB    | 1.83                     | 1.09              |
| 2:B:79:VAL:CG2   | 2:B:108:PHE:CE1  | 2.36                     | 1.09              |
| 2:B:151:ALA:HA   | 2:B:180:LEU:HD11 | 1.16                     | 1.09              |
| 2:B:553:ALA:HB2  | 2:B:614:ILE:HD13 | 1.11                     | 1.09              |

*Continued on next page...*

*Continued from previous page...*

| Atom-1           | Atom-2           | Interatomic distance (Å) | Clash overlap (Å) |
|------------------|------------------|--------------------------|-------------------|
| 3:M:342:LEU:HD11 | 3:M:411:LEU:HD22 | 1.18                     | 1.09              |
| 4:S:109:LEU:HD11 | 4:S:113:PHE:CD1  | 1.85                     | 1.09              |
| 1:A:103:LYS:HG3  | 4:S:163:THR:CG2  | 1.82                     | 1.09              |
| 1:A:586:GLU:O    | 1:A:587:ASN:C    | 1.83                     | 1.09              |
| 2:B:219:TYR:OH   | 2:B:226:LEU:HA   | 1.50                     | 1.09              |
| 2:B:515:PHE:HE2  | 2:B:529:VAL:HG21 | 1.15                     | 1.09              |
| 2:B:530:LEU:HG   | 2:B:591:MET:HB3  | 1.32                     | 1.09              |
| 2:B:566:ALA:C    | 2:B:574:ASN:HD22 | 1.56                     | 1.09              |
| 2:B:568:VAL:O    | 2:B:571:SER:HB2  | 1.49                     | 1.09              |
| 3:M:443:SER:HB3  | 3:M:447:ILE:HG13 | 1.17                     | 1.09              |
| 3:M:451:ALA:C    | 3:M:452:ILE:HD12 | 1.72                     | 1.09              |
| 4:S:5:VAL:CB     | 4:S:132:LEU:HD21 | 1.81                     | 1.09              |
| 1:A:182:ILE:HD13 | 1:A:218:ALA:HB2  | 1.34                     | 1.09              |
| 1:A:403:LEU:HD22 | 1:A:422:GLU:CD   | 1.70                     | 1.09              |
| 2:B:225:LEU:HD13 | 2:B:283:TYR:HE1  | 1.05                     | 1.09              |
| 2:B:292:GLU:CG   | 2:B:296:ASP:HB2  | 1.82                     | 1.09              |
| 3:M:267:ILE:HD12 | 3:M:445:SER:OG   | 1.52                     | 1.09              |
| 1:A:67:LYS:N     | 4:S:165:SER:HB2  | 1.68                     | 1.08              |
| 1:A:105:VAL:HB   | 4:S:167:ILE:HD13 | 1.34                     | 1.08              |
| 1:A:141:VAL:HG21 | 4:S:158:LYS:H    | 1.03                     | 1.08              |
| 1:A:513:ARG:HD2  | 1:A:550:VAL:CG2  | 1.81                     | 1.08              |
| 2:B:197:LYS:N    | 2:B:229:HIS:NE2  | 2.01                     | 1.08              |
| 3:M:217:ASP:H    | 3:M:470:ALA:HB3  | 1.07                     | 1.08              |
| 1:A:132:LEU:HD22 | 1:A:169:MET:CG   | 1.82                     | 1.08              |
| 1:A:140:VAL:HA   | 1:A:177:ILE:HG13 | 1.22                     | 1.08              |
| 1:A:215:VAL:HG22 | 1:A:243:ILE:CD1  | 1.82                     | 1.08              |
| 1:A:298:ILE:HD11 | 1:A:311:THR:HG21 | 1.33                     | 1.08              |
| 1:A:408:ILE:CG2  | 4:S:64:ASN:HB3   | 1.70                     | 1.08              |
| 1:A:429:VAL:HB   | 1:A:469:LEU:CD1  | 1.82                     | 1.08              |
| 1:A:448:GLU:HB2  | 1:A:487:MET:SD   | 1.93                     | 1.08              |
| 2:B:343:LEU:HD12 | 2:B:359:LEU:HD13 | 1.23                     | 1.08              |
| 3:M:65:TYR:CE2   | 3:M:86:PRO:HB3   | 1.88                     | 1.08              |
| 3:M:323:MET:HB3  | 3:M:340:LEU:HD11 | 1.21                     | 1.08              |
| 3:M:435:LEU:O    | 3:M:479:PHE:CD2  | 2.06                     | 1.08              |
| 4:S:5:VAL:CG1    | 4:S:132:LEU:HD22 | 1.83                     | 1.08              |
| 1:A:132:LEU:O    | 1:A:169:MET:CE   | 2.00                     | 1.08              |
| 1:A:217:ALA:HA   | 4:S:142:ILE:CA   | 1.63                     | 1.08              |
| 1:A:224:GLU:HB2  | 4:S:138:GLY:O    | 0.92                     | 1.08              |
| 2:B:107:ARG:O    | 2:B:110:GLU:N    | 1.87                     | 1.08              |
| 2:B:347:VAL:HG22 | 2:B:359:LEU:HB3  | 1.23                     | 1.08              |
| 2:B:534:ILE:HD13 | 2:B:594:ALA:HB3  | 1.33                     | 1.08              |

*Continued on next page...*



*Continued from previous page...*

| Atom-1           | Atom-2           | Interatomic distance (Å) | Clash overlap (Å) |
|------------------|------------------|--------------------------|-------------------|
| 2:B:566:ALA:O    | 2:B:574:ASN:HB2  | 0.91                     | 1.08              |
| 3:M:245:ASP:N    | 3:M:472:TYR:CE1  | 2.20                     | 1.08              |
| 1:A:103:LYS:N    | 4:S:163:THR:CB   | 2.16                     | 1.08              |
| 2:B:56:SER:HB3   | 2:B:92:THR:HG21  | 1.31                     | 1.08              |
| 2:B:175:LEU:HG   | 2:B:210:CYS:HB3  | 1.11                     | 1.08              |
| 2:B:215:TYR:HB3  | 2:B:226:LEU:HD11 | 1.29                     | 1.08              |
| 2:B:400:SER:CB   | 2:B:439:CYS:SG   | 2.42                     | 1.08              |
| 2:B:497:LEU:HD23 | 2:B:533:LEU:HD21 | 1.09                     | 1.08              |
| 2:B:567:GLN:HG3  | 2:B:569:THR:OG1  | 1.53                     | 1.08              |
| 3:M:336:ASP:O    | 3:M:414:CYS:SG   | 2.10                     | 1.08              |
| 1:A:68:THR:HA    | 4:S:167:ILE:N    | 1.67                     | 1.08              |
| 1:A:132:LEU:O    | 1:A:169:MET:HE1  | 1.52                     | 1.08              |
| 1:A:170:LEU:O    | 1:A:206:LYS:CD   | 2.00                     | 1.08              |
| 1:A:219:VAL:HG21 | 1:A:256:LEU:CD2  | 1.82                     | 1.08              |
| 1:A:609:LEU:HD21 | 1:A:628:VAL:CG2  | 1.83                     | 1.08              |
| 2:B:175:LEU:HD21 | 2:B:210:CYS:HA   | 1.32                     | 1.08              |
| 2:B:216:LYS:HB2  | 2:B:251:LEU:HD13 | 1.31                     | 1.08              |
| 2:B:307:ASN:ND2  | 2:B:336:ASN:HD21 | 1.48                     | 1.08              |
| 2:B:319:LEU:HD11 | 2:B:358:MET:HG3  | 1.29                     | 1.08              |
| 3:M:454:ILE:HG21 | 3:M:464:THR:CG2  | 1.84                     | 1.08              |
| 4:S:15:ARG:CZ    | 4:S:122:ILE:HD11 | 1.84                     | 1.08              |
| 1:A:132:LEU:HD22 | 1:A:169:MET:HG3  | 1.13                     | 1.07              |
| 1:A:182:ILE:HG22 | 1:A:221:VAL:HG21 | 1.20                     | 1.07              |
| 2:B:21:GLU:HA    | 2:B:24:ALA:HB2   | 1.35                     | 1.07              |
| 2:B:159:LYS:CA   | 2:B:195:ILE:HD11 | 1.84                     | 1.07              |
| 2:B:175:LEU:HD11 | 2:B:210:CYS:SG   | 1.94                     | 1.07              |
| 2:B:279:LEU:HG   | 2:B:288:TYR:HD1  | 1.12                     | 1.07              |
| 2:B:292:GLU:OE2  | 2:B:296:ASP:OD2  | 1.71                     | 1.07              |
| 2:B:352:ASN:HA   | 3:M:49:ASP:OD2   | 1.37                     | 1.07              |
| 2:B:396:ILE:HD13 | 2:B:432:ALA:HB2  | 1.36                     | 1.07              |
| 2:B:433:VAL:HG12 | 2:B:474:VAL:CB   | 1.84                     | 1.07              |
| 3:M:254:PRO:HB3  | 3:M:454:ILE:HD12 | 1.26                     | 1.07              |
| 4:S:53:THR:HG21  | 4:S:68:VAL:CA    | 1.83                     | 1.07              |
| 2:B:197:LYS:CA   | 2:B:229:HIS:CD2  | 2.36                     | 1.07              |
| 2:B:208:ILE:HG12 | 2:B:236:ILE:HD13 | 1.31                     | 1.07              |
| 2:B:247:TYR:CE2  | 3:M:91:THR:CG2   | 2.36                     | 1.07              |
| 2:B:247:TYR:CZ   | 3:M:91:THR:HG21  | 1.87                     | 1.07              |
| 2:B:316:THR:OG1  | 3:M:90:PHE:HZ    | 1.37                     | 1.07              |
| 2:B:458:MET:SD   | 2:B:471:TYR:HB3  | 1.94                     | 1.07              |
| 3:M:222:PHE:C    | 3:M:479:PHE:CE2  | 2.28                     | 1.07              |
| 1:A:251:TRP:CZ2  | 4:S:103:GLN:HB2  | 1.90                     | 1.07              |

*Continued on next page...*

*Continued from previous page...*

| Atom-1           | Atom-2           | Interatomic distance (Å) | Clash overlap (Å) |
|------------------|------------------|--------------------------|-------------------|
| 1:A:322:PHE:CD2  | 1:A:330:LEU:HD21 | 1.88                     | 1.07              |
| 1:A:509:PRO:HB3  | 1:A:547:VAL:CG2  | 1.84                     | 1.07              |
| 1:A:555:LEU:HD13 | 1:A:581:LEU:CD1  | 1.84                     | 1.07              |
| 1:A:633:PHE:CB   | 2:B:550:VAL:CG1  | 2.22                     | 1.07              |
| 1:A:633:PHE:HB2  | 2:B:550:VAL:CG1  | 1.80                     | 1.07              |
| 2:B:123:LEU:HD12 | 2:B:142:LEU:CG   | 1.79                     | 1.07              |
| 2:B:278:PRO:HD3  | 2:B:289:PRO:O    | 1.52                     | 1.07              |
| 2:B:353:GLN:CB   | 3:M:49:ASP:N     | 2.09                     | 1.07              |
| 3:M:217:ASP:HB2  | 3:M:470:ALA:C    | 1.67                     | 1.07              |
| 3:M:217:ASP:N    | 3:M:470:ALA:HB3  | 1.70                     | 1.07              |
| 3:M:219:LEU:HB2  | 3:M:472:TYR:O    | 1.54                     | 1.07              |
| 4:S:53:THR:O     | 4:S:69:ASN:HB2   | 1.50                     | 1.07              |
| 4:S:73:ILE:HG21  | 4:S:88:ILE:HG21  | 1.33                     | 1.07              |
| 2:B:278:PRO:CA   | 2:B:288:TYR:O    | 2.00                     | 1.07              |
| 4:S:5:VAL:HG11   | 4:S:132:LEU:HD22 | 1.09                     | 1.07              |
| 1:A:166:LEU:HD13 | 1:A:185:LEU:CD2  | 1.85                     | 1.07              |
| 1:A:384:LEU:HD22 | 1:A:441:TYR:CZ   | 1.88                     | 1.07              |
| 1:A:384:LEU:HD13 | 1:A:435:ILE:CG2  | 1.85                     | 1.07              |
| 2:B:154:ILE:HD12 | 2:B:180:LEU:HD13 | 1.12                     | 1.07              |
| 2:B:274:PRO:C    | 2:B:295:ASN:ND2  | 2.08                     | 1.07              |
| 2:B:290:SER:O    | 2:B:291:TYR:C    | 1.75                     | 1.07              |
| 2:B:367:SER:OG   | 2:B:401:THR:HG21 | 1.55                     | 1.07              |
| 2:B:549:LEU:HD23 | 2:B:607:ILE:O    | 1.54                     | 1.07              |
| 2:B:560:ILE:HG23 | 2:B:564:LYS:HB2  | 1.35                     | 1.07              |
| 1:A:207:LEU:HD23 | 1:A:239:LEU:HB2  | 1.29                     | 1.06              |
| 1:A:237:SER:HB2  | 1:A:270:LEU:HD13 | 1.37                     | 1.06              |
| 1:A:594:PHE:HB3  | 2:B:473:ASN:HB3  | 1.32                     | 1.06              |
| 2:B:77:ILE:HG22  | 2:B:82:TYR:HE1   | 1.18                     | 1.06              |
| 2:B:120:ILE:HA   | 2:B:142:LEU:HD21 | 1.34                     | 1.06              |
| 2:B:132:SER:HA   | 2:B:169:VAL:CG2  | 1.85                     | 1.06              |
| 2:B:158:VAL:HG11 | 2:B:177:ILE:HG13 | 1.34                     | 1.06              |
| 2:B:219:TYR:CE1  | 2:B:226:LEU:CA   | 2.27                     | 1.06              |
| 2:B:515:PHE:CE2  | 2:B:529:VAL:HG21 | 1.89                     | 1.06              |
| 2:B:537:PHE:CE1  | 2:B:545:ARG:HG2  | 1.91                     | 1.06              |
| 3:M:45:SER:CB    | 3:M:51:LEU:HD11  | 1.85                     | 1.06              |
| 4:S:53:THR:HG21  | 4:S:68:VAL:HA    | 1.36                     | 1.06              |
| 2:B:175:LEU:HD23 | 2:B:210:CYS:O    | 1.53                     | 1.06              |
| 2:B:291:TYR:HE2  | 2:B:294:VAL:HB   | 0.90                     | 1.06              |
| 2:B:343:LEU:HD11 | 2:B:359:LEU:HA   | 1.06                     | 1.06              |
| 2:B:353:GLN:CD   | 3:M:47:SER:HB2   | 1.76                     | 1.06              |
| 3:M:215:TYR:CG   | 3:M:468:LYS:CA   | 2.38                     | 1.06              |

*Continued on next page...*

*Continued from previous page...*

| Atom-1           | Atom-2           | Interatomic distance (Å) | Clash overlap (Å) |
|------------------|------------------|--------------------------|-------------------|
| 1:A:67:LYS:HB3   | 1:A:94:VAL:HG22  | 1.32                     | 1.06              |
| 1:A:80:TYR:HB2   | 1:A:82:PHE:CD2   | 1.90                     | 1.06              |
| 1:A:204:VAL:HG22 | 1:A:236:LEU:HD22 | 1.21                     | 1.06              |
| 1:A:211:ASP:OD2  | 4:S:148:ARG:NH1  | 1.89                     | 1.06              |
| 2:B:225:LEU:CD1  | 2:B:283:TYR:CE1  | 2.36                     | 1.06              |
| 2:B:303:LEU:HD11 | 2:B:333:GLN:HB3  | 1.31                     | 1.06              |
| 2:B:527:PRO:CG   | 2:B:587:ARG:HG3  | 1.85                     | 1.06              |
| 3:M:374:TYR:O    | 3:M:390:ILE:HD12 | 1.51                     | 1.06              |
| 1:A:295:VAL:HG22 | 1:A:315:CYS:HB3  | 1.25                     | 1.06              |
| 2:B:29:LYS:CE    | 2:B:30:LEU:N     | 2.11                     | 1.06              |
| 2:B:127:LEU:HD23 | 2:B:161:LEU:HD21 | 1.07                     | 1.06              |
| 2:B:178:ILE:CG2  | 2:B:217:GLU:HB2  | 1.85                     | 1.06              |
| 2:B:274:PRO:CG   | 2:B:295:ASN:OD1  | 2.03                     | 1.06              |
| 2:B:353:GLN:CG   | 3:M:47:SER:O     | 2.02                     | 1.06              |
| 3:M:302:TYR:CD2  | 3:M:445:SER:HB3  | 1.90                     | 1.06              |
| 3:M:338:PHE:CE2  | 3:M:415:ILE:CG1  | 2.39                     | 1.06              |
| 1:A:207:LEU:CD2  | 1:A:239:LEU:HB2  | 1.85                     | 1.06              |
| 1:A:215:VAL:HG21 | 1:A:243:ILE:HD12 | 1.31                     | 1.06              |
| 1:A:224:GLU:HB2  | 4:S:138:GLY:C    | 1.75                     | 1.06              |
| 1:A:258:LYS:HZ1  | 4:S:97:ALA:HB2   | 1.20                     | 1.06              |
| 2:B:136:CYS:C    | 2:B:172:GLU:HG3  | 1.75                     | 1.06              |
| 2:B:177:ILE:HB   | 2:B:196:LEU:HD21 | 1.37                     | 1.06              |
| 2:B:256:CYS:SG   | 2:B:299:LEU:HD23 | 1.96                     | 1.06              |
| 2:B:293:VAL:O    | 2:B:299:LEU:CB   | 2.04                     | 1.06              |
| 2:B:319:LEU:HD13 | 2:B:358:MET:HG3  | 1.09                     | 1.06              |
| 2:B:437:SER:CA   | 2:B:478:LEU:HD21 | 1.86                     | 1.06              |
| 2:B:508:ARG:O    | 2:B:512:VAL:HG23 | 1.54                     | 1.06              |
| 2:B:527:PRO:HB3  | 2:B:587:ARG:HG3  | 1.32                     | 1.06              |
| 1:A:533:ILE:HG12 | 1:A:562:TRP:CH2  | 1.91                     | 1.05              |
| 2:B:25:VAL:CG2   | 2:B:36:THR:OG1   | 2.04                     | 1.05              |
| 2:B:219:TYR:OH   | 2:B:226:LEU:N    | 1.87                     | 1.05              |
| 2:B:433:VAL:CG1  | 2:B:474:VAL:CG2  | 2.12                     | 1.05              |
| 2:B:546:CYS:CA   | 2:B:607:ILE:HG12 | 1.85                     | 1.05              |
| 3:M:226:PHE:N    | 3:M:480:GLN:O    | 1.89                     | 1.05              |
| 3:M:360:LEU:HD23 | 3:M:362:PHE:CZ   | 1.90                     | 1.05              |
| 1:A:225:LEU:HD13 | 1:A:233:PHE:HZ   | 0.99                     | 1.05              |
| 1:A:630:PRO:O    | 2:B:554:LYS:CA   | 2.05                     | 1.05              |
| 2:B:79:VAL:CB    | 2:B:108:PHE:CE1  | 2.38                     | 1.05              |
| 2:B:116:THR:HG22 | 2:B:150:LEU:HD11 | 1.35                     | 1.05              |
| 2:B:549:LEU:CD1  | 2:B:611:ALA:CA   | 2.31                     | 1.05              |
| 3:M:60:LEU:CD2   | 3:M:62:VAL:HG23  | 1.86                     | 1.05              |

*Continued on next page...*

*Continued from previous page...*

| Atom-1           | Atom-2           | Interatomic distance (Å) | Clash overlap (Å) |
|------------------|------------------|--------------------------|-------------------|
| 3:M:66:PHE:HA    | 3:M:77:LEU:HD11  | 1.38                     | 1.05              |
| 3:M:244:VAL:O    | 3:M:299:LEU:N    | 1.88                     | 1.05              |
| 1:A:67:LYS:H     | 4:S:165:SER:CB   | 1.68                     | 1.05              |
| 1:A:166:LEU:CD1  | 1:A:185:LEU:CD2  | 2.33                     | 1.05              |
| 1:A:200:PHE:CE1  | 1:A:232:PRO:O    | 2.09                     | 1.05              |
| 1:A:260:PHE:CD2  | 1:A:274:LEU:HG   | 1.91                     | 1.05              |
| 1:A:629:LEU:CG   | 2:B:610:ARG:NH1  | 2.18                     | 1.05              |
| 1:A:630:PRO:HG3  | 2:B:614:ILE:HG13 | 1.27                     | 1.05              |
| 1:A:633:PHE:CD1  | 2:B:513:TRP:CE3  | 2.40                     | 1.05              |
| 2:B:77:ILE:HG22  | 2:B:82:TYR:CE1   | 1.92                     | 1.05              |
| 2:B:566:ALA:CA   | 2:B:574:ASN:CG   | 2.25                     | 1.05              |
| 3:M:348:LYS:HG3  | 3:M:405:THR:HG22 | 1.38                     | 1.05              |
| 1:A:557:LYS:HE3  | 2:B:606:ASP:HB2  | 1.38                     | 1.05              |
| 1:A:631:SER:CA   | 2:B:557:SER:HB3  | 1.82                     | 1.05              |
| 2:B:286:ILE:O    | 2:B:287:GLU:O    | 1.73                     | 1.05              |
| 2:B:315:PRO:CB   | 2:B:352:ASN:OD1  | 2.04                     | 1.05              |
| 3:M:341:SER:OG   | 3:M:343:ASN:ND2  | 1.88                     | 1.05              |
| 3:M:342:LEU:HD13 | 3:M:411:LEU:HB2  | 1.38                     | 1.05              |
| 1:A:101:GLN:HG2  | 4:S:167:ILE:CG2  | 1.86                     | 1.05              |
| 1:A:176:TYR:HB2  | 4:S:155:GLU:HG3  | 1.33                     | 1.05              |
| 2:B:20:ARG:HD2   | 2:B:21:GLU:HB2   | 1.15                     | 1.05              |
| 2:B:245:GLN:CG   | 2:B:309:LEU:HD11 | 1.85                     | 1.05              |
| 2:B:309:LEU:HB3  | 2:B:317:VAL:HG12 | 1.07                     | 1.05              |
| 2:B:545:ARG:CD   | 2:B:602:ASP:HB2  | 1.86                     | 1.05              |
| 2:B:566:ALA:C    | 2:B:574:ASN:ND2  | 2.11                     | 1.05              |
| 3:M:64:LYS:NZ    | 3:M:79:SER:O     | 1.90                     | 1.05              |
| 3:M:244:VAL:HB   | 3:M:300:LEU:HG   | 1.39                     | 1.05              |
| 4:S:8:PHE:HB2    | 4:S:36:TYR:HE2   | 0.90                     | 1.05              |
| 1:A:182:ILE:HG22 | 1:A:221:VAL:HG23 | 1.33                     | 1.04              |
| 1:A:260:PHE:O    | 1:A:261:THR:C    | 1.78                     | 1.04              |
| 1:A:440:ASN:CG   | 1:A:442:SER:HB3  | 1.77                     | 1.04              |
| 2:B:2:VAL:CG1    | 2:B:6:HIS:CE1    | 2.36                     | 1.04              |
| 2:B:20:ARG:HD2   | 2:B:35:TYR:OH    | 1.56                     | 1.04              |
| 2:B:154:ILE:HD13 | 2:B:180:LEU:HB2  | 1.37                     | 1.04              |
| 2:B:162:VAL:HG22 | 2:B:199:LEU:HG   | 1.11                     | 1.04              |
| 2:B:219:TYR:HE1  | 2:B:226:LEU:CD1  | 1.51                     | 1.04              |
| 2:B:223:LEU:HD11 | 2:B:258:GLN:C    | 1.77                     | 1.04              |
| 2:B:563:PHE:O    | 2:B:567:GLN:N    | 1.88                     | 1.04              |
| 3:M:49:ASP:HA    | 3:M:75:TRP:CH2   | 1.91                     | 1.04              |
| 1:A:67:LYS:O     | 1:A:71:VAL:HG23  | 1.58                     | 1.04              |
| 1:A:182:ILE:CG2  | 1:A:221:VAL:CG2  | 2.33                     | 1.04              |

*Continued on next page...*

*Continued from previous page...*

| Atom-1           | Atom-2           | Interatomic distance (Å) | Clash overlap (Å) |
|------------------|------------------|--------------------------|-------------------|
| 1:A:630:PRO:HG2  | 2:B:614:ILE:CA   | 1.87                     | 1.04              |
| 1:A:633:PHE:CD2  | 2:B:551:LEU:HA   | 1.54                     | 1.04              |
| 2:B:158:VAL:HG13 | 2:B:173:VAL:HG12 | 1.37                     | 1.04              |
| 2:B:162:VAL:HG21 | 2:B:195:ILE:HG22 | 1.34                     | 1.04              |
| 2:B:178:ILE:HG23 | 2:B:217:GLU:HB2  | 1.38                     | 1.04              |
| 2:B:215:TYR:HB3  | 2:B:226:LEU:CD1  | 1.87                     | 1.04              |
| 2:B:278:PRO:HA   | 2:B:288:TYR:CB   | 1.87                     | 1.04              |
| 2:B:396:ILE:HG12 | 2:B:418:TYR:CE2  | 1.93                     | 1.04              |
| 3:M:327:PHE:HE1  | 3:M:336:ASP:HB2  | 1.19                     | 1.04              |
| 4:S:53:THR:HB    | 4:S:68:VAL:C     | 1.77                     | 1.04              |
| 1:A:71:VAL:HG11  | 1:A:105:VAL:HG12 | 1.36                     | 1.04              |
| 1:A:147:LEU:HD22 | 1:A:166:LEU:HD21 | 1.07                     | 1.04              |
| 2:B:162:VAL:HG22 | 2:B:199:LEU:CD1  | 1.87                     | 1.04              |
| 2:B:537:PHE:CE2  | 2:B:598:LEU:O    | 2.11                     | 1.04              |
| 2:B:567:GLN:CG   | 2:B:569:THR:OG1  | 2.05                     | 1.04              |
| 3:M:215:TYR:HD1  | 3:M:467:TYR:O    | 1.39                     | 1.04              |
| 3:M:245:ASP:N    | 3:M:472:TYR:CG   | 2.09                     | 1.04              |
| 1:A:150:LEU:HB3  | 1:A:162:ILE:HD13 | 1.37                     | 1.04              |
| 1:A:557:LYS:HE2  | 2:B:606:ASP:CA   | 1.86                     | 1.04              |
| 1:A:557:LYS:HE3  | 2:B:606:ASP:CB   | 1.86                     | 1.04              |
| 1:A:594:PHE:CB   | 2:B:473:ASN:CB   | 2.34                     | 1.04              |
| 2:B:248:LEU:O    | 2:B:252:LEU:HG   | 1.58                     | 1.04              |
| 2:B:340:ILE:HD11 | 2:B:366:LEU:HB3  | 1.38                     | 1.04              |
| 2:B:542:PRO:HA   | 2:B:602:ASP:CG   | 1.76                     | 1.04              |
| 3:M:244:VAL:HG13 | 3:M:472:TYR:CZ   | 1.92                     | 1.04              |
| 1:A:96:SER:HB3   | 1:A:127:LEU:CD1  | 1.86                     | 1.04              |
| 1:A:251:TRP:CH2  | 4:S:103:GLN:CB   | 2.41                     | 1.04              |
| 1:A:636:TYR:HB2  | 2:B:554:LYS:HZ2  | 1.19                     | 1.04              |
| 2:B:41:ASN:CB    | 2:B:43:ASN:OD1   | 2.04                     | 1.04              |
| 2:B:261:PRO:CA   | 2:B:290:SER:CB   | 2.35                     | 1.04              |
| 2:B:303:LEU:HD11 | 2:B:333:GLN:CB   | 1.84                     | 1.04              |
| 2:B:309:LEU:CB   | 2:B:317:VAL:CG1  | 2.35                     | 1.04              |
| 2:B:519:ALA:O    | 2:B:523:PHE:CD2  | 2.11                     | 1.04              |
| 3:M:222:PHE:HB2  | 3:M:479:PHE:CZ   | 1.92                     | 1.04              |
| 3:M:223:HIS:CA   | 3:M:479:PHE:CE2  | 2.41                     | 1.04              |
| 3:M:226:PHE:HZ   | 3:M:321:GLY:O    | 1.41                     | 1.04              |
| 1:A:103:LYS:H    | 4:S:163:THR:HG21 | 1.23                     | 1.03              |
| 1:A:104:ARG:CA   | 1:A:145:ILE:HG21 | 1.88                     | 1.03              |
| 1:A:105:VAL:HG21 | 4:S:167:ILE:HG23 | 1.40                     | 1.03              |
| 2:B:178:ILE:HD11 | 2:B:215:TYR:HA   | 1.07                     | 1.03              |
| 2:B:267:ASP:C    | 2:B:276:SER:HB2  | 1.79                     | 1.03              |

*Continued on next page...*

*Continued from previous page...*

| Atom-1           | Atom-2           | Interatomic distance (Å) | Clash overlap (Å) |
|------------------|------------------|--------------------------|-------------------|
| 2:B:340:ILE:HD13 | 2:B:366:LEU:HD13 | 1.32                     | 1.03              |
| 2:B:343:LEU:HD21 | 2:B:362:ALA:HB3  | 1.35                     | 1.03              |
| 2:B:537:PHE:CG   | 2:B:598:LEU:HB3  | 1.92                     | 1.03              |
| 3:M:214:LEU:O    | 3:M:467:TYR:N    | 1.89                     | 1.03              |
| 1:A:251:TRP:CZ2  | 4:S:103:GLN:HB3  | 1.93                     | 1.03              |
| 2:B:158:VAL:CG1  | 2:B:177:ILE:HG13 | 1.86                     | 1.03              |
| 2:B:175:LEU:HD21 | 2:B:210:CYS:CA   | 1.88                     | 1.03              |
| 2:B:343:LEU:HD12 | 2:B:359:LEU:HD12 | 1.33                     | 1.03              |
| 2:B:493:LEU:HG   | 2:B:511:ILE:HG23 | 1.40                     | 1.03              |
| 2:B:530:LEU:CG   | 2:B:591:MET:HB3  | 1.88                     | 1.03              |
| 3:M:319:SER:HB3  | 3:M:346:ASN:H    | 0.98                     | 1.03              |
| 3:M:449:VAL:HG12 | 3:M:452:ILE:HD11 | 1.36                     | 1.03              |
| 1:A:323:CYS:SG   | 1:A:334:SER:HB3  | 1.97                     | 1.03              |
| 1:A:397:ASP:O    | 1:A:418:ILE:HG13 | 1.59                     | 1.03              |
| 2:B:154:ILE:CD1  | 2:B:180:LEU:HB2  | 1.87                     | 1.03              |
| 2:B:175:LEU:HA   | 2:B:214:ALA:HB2  | 1.35                     | 1.03              |
| 2:B:508:ARG:CB   | 2:B:544:THR:HG23 | 1.87                     | 1.03              |
| 3:M:60:LEU:HD23  | 3:M:61:GLU:N     | 1.71                     | 1.03              |
| 3:M:243:ILE:O    | 3:M:472:TYR:CD2  | 2.12                     | 1.03              |
| 3:M:290:PHE:CZ   | 3:M:297:PHE:CG   | 2.47                     | 1.03              |
| 3:M:319:SER:CB   | 3:M:346:ASN:H    | 1.70                     | 1.03              |
| 1:A:68:THR:HA    | 4:S:166:LYS:C    | 1.76                     | 1.03              |
| 1:A:140:VAL:CG2  | 1:A:177:ILE:HG13 | 1.87                     | 1.03              |
| 2:B:424:PHE:CD2  | 2:B:428:VAL:HG11 | 1.93                     | 1.03              |
| 2:B:542:PRO:CA   | 2:B:602:ASP:OD2  | 2.07                     | 1.03              |
| 3:M:2:TYR:N      | 3:M:81:SER:CB    | 2.22                     | 1.03              |
| 3:M:224:VAL:O    | 3:M:480:GLN:N    | 1.91                     | 1.03              |
| 3:M:243:ILE:H    | 3:M:474:THR:HG22 | 0.87                     | 1.03              |
| 1:A:132:LEU:HD13 | 1:A:165:ASP:HB3  | 1.40                     | 1.03              |
| 1:A:176:TYR:CB   | 4:S:155:GLU:CG   | 2.35                     | 1.03              |
| 1:A:183:THR:O    | 1:A:186:PHE:HB3  | 1.59                     | 1.03              |
| 1:A:398:GLU:O    | 1:A:420:ILE:N    | 1.90                     | 1.03              |
| 1:A:594:PHE:HB3  | 2:B:473:ASN:HB2  | 1.09                     | 1.03              |
| 1:A:605:GLU:HG3  | 1:A:632:PHE:CE2  | 1.93                     | 1.03              |
| 2:B:120:ILE:HA   | 2:B:142:LEU:CD2  | 1.88                     | 1.03              |
| 2:B:227:HIS:C    | 2:B:229:HIS:H    | 1.59                     | 1.03              |
| 2:B:371:GLN:NE2  | 2:B:401:THR:O    | 1.90                     | 1.03              |
| 1:A:96:SER:HA    | 1:A:127:LEU:HD11 | 1.39                     | 1.02              |
| 1:A:140:VAL:HG22 | 1:A:177:ILE:HG13 | 1.33                     | 1.02              |
| 1:A:225:LEU:HB3  | 1:A:233:PHE:CE1  | 1.94                     | 1.02              |
| 1:A:323:CYS:SG   | 1:A:334:SER:CB   | 2.47                     | 1.02              |

*Continued on next page...*

*Continued from previous page...*

| Atom-1           | Atom-2           | Interatomic distance (Å) | Clash overlap (Å) |
|------------------|------------------|--------------------------|-------------------|
| 2:B:135:ARG:NH2  | 2:B:164:ASP:CG   | 2.12                     | 1.02              |
| 2:B:215:TYR:CZ   | 2:B:229:HIS:HB3  | 1.94                     | 1.02              |
| 2:B:567:GLN:N    | 2:B:574:ASN:HD22 | 1.55                     | 1.02              |
| 3:M:214:LEU:HD11 | 3:M:256:VAL:HG21 | 1.41                     | 1.02              |
| 3:M:242:GLY:HA2  | 3:M:474:THR:HG21 | 1.40                     | 1.02              |
| 1:A:96:SER:HB2   | 1:A:127:LEU:HD11 | 1.39                     | 1.02              |
| 1:A:111:SER:HB2  | 1:A:152:THR:OG1  | 0.86                     | 1.02              |
| 1:A:219:VAL:HG22 | 1:A:240:LEU:HD22 | 1.42                     | 1.02              |
| 1:A:463:ASP:O    | 2:B:1:MET:SD     | 2.16                     | 1.02              |
| 1:A:563:CYS:HA   | 1:A:566:PHE:HD2  | 1.23                     | 1.02              |
| 1:A:630:PRO:CG   | 2:B:614:ILE:CG1  | 1.92                     | 1.02              |
| 2:B:243:TRP:CZ3  | 3:M:91:THR:HA    | 1.94                     | 1.02              |
| 2:B:553:ALA:HB2  | 2:B:614:ILE:CG1  | 1.88                     | 1.02              |
| 2:B:564:LYS:HD2  | 2:B:621:GLY:O    | 1.58                     | 1.02              |
| 2:B:588:ILE:HG23 | 2:B:618:PHE:CZ   | 1.93                     | 1.02              |
| 3:M:243:ILE:HB   | 3:M:473:LYS:O    | 1.55                     | 1.02              |
| 4:S:8:PHE:HB3    | 4:S:36:TYR:CE2   | 1.92                     | 1.02              |
| 4:S:17:VAL:HG22  | 4:S:19:PHE:CZ    | 1.94                     | 1.02              |
| 1:A:102:GLN:HA   | 4:S:167:ILE:CG1  | 1.88                     | 1.02              |
| 1:A:102:GLN:OE1  | 4:S:166:LYS:HG3  | 1.58                     | 1.02              |
| 1:A:217:ALA:O    | 4:S:142:ILE:CG2  | 2.06                     | 1.02              |
| 1:A:251:TRP:CH2  | 4:S:103:GLN:OE1  | 2.11                     | 1.02              |
| 2:B:106:LEU:CD1  | 2:B:144:ASP:HB2  | 1.74                     | 1.02              |
| 2:B:418:TYR:O    | 2:B:419:VAL:C    | 1.88                     | 1.02              |
| 3:M:7:ILE:HA     | 3:M:76:CYS:HA    | 1.40                     | 1.02              |
| 3:M:65:TYR:CE1   | 3:M:86:PRO:CB    | 2.43                     | 1.02              |
| 1:A:141:VAL:HB   | 4:S:159:ALA:N    | 1.73                     | 1.02              |
| 2:B:127:LEU:HB2  | 2:B:157:THR:HG23 | 1.39                     | 1.02              |
| 2:B:143:SER:C    | 2:B:179:LYS:HD3  | 1.70                     | 1.02              |
| 2:B:219:TYR:CB   | 2:B:223:LEU:CD2  | 2.14                     | 1.02              |
| 2:B:267:ASP:H    | 2:B:289:PRO:HB3  | 0.88                     | 1.02              |
| 2:B:343:LEU:HD22 | 2:B:362:ALA:HB3  | 1.33                     | 1.02              |
| 4:S:53:THR:CG2   | 4:S:67:GLU:C     | 2.27                     | 1.02              |
| 1:A:67:LYS:HB2   | 4:S:165:SER:OG   | 1.59                     | 1.02              |
| 1:A:96:SER:CA    | 1:A:127:LEU:CD1  | 2.38                     | 1.02              |
| 1:A:200:PHE:HE1  | 1:A:232:PRO:O    | 1.39                     | 1.02              |
| 1:A:223:CYS:HB2  | 1:A:259:LEU:HG   | 1.42                     | 1.02              |
| 2:B:38:TYR:HA    | 2:B:42:ILE:H     | 1.23                     | 1.02              |
| 2:B:70:MET:HE3   | 2:B:107:ARG:CB   | 1.82                     | 1.02              |
| 2:B:79:VAL:CG2   | 2:B:108:PHE:CZ   | 2.43                     | 1.02              |
| 2:B:278:PRO:C    | 2:B:288:TYR:HB2  | 1.78                     | 1.02              |

*Continued on next page...*

*Continued from previous page...*

| Atom-1           | Atom-2           | Interatomic distance (Å) | Clash overlap (Å) |
|------------------|------------------|--------------------------|-------------------|
| 2:B:537:PHE:CD2  | 2:B:598:LEU:CB   | 2.43                     | 1.02              |
| 4:S:48:SER:CB    | 4:S:77:TYR:HB2   | 1.86                     | 1.02              |
| 2:B:56:SER:HB3   | 2:B:92:THR:CG2   | 1.89                     | 1.01              |
| 2:B:62:ALA:C     | 2:B:66:ILE:HD12  | 1.80                     | 1.01              |
| 2:B:155:LEU:HB2  | 2:B:188:TYR:HD2  | 1.22                     | 1.01              |
| 2:B:261:PRO:HA   | 2:B:290:SER:HB3  | 1.03                     | 1.01              |
| 2:B:415:LEU:HD13 | 2:B:436:LEU:HD21 | 1.39                     | 1.01              |
| 2:B:550:VAL:HG22 | 2:B:610:ARG:HD3  | 1.37                     | 1.01              |
| 3:M:344:ILE:HG23 | 3:M:347:PHE:CB   | 1.89                     | 1.01              |
| 1:A:101:GLN:HG2  | 4:S:167:ILE:CB   | 1.90                     | 1.01              |
| 1:A:104:ARG:HG3  | 1:A:145:ILE:CG1  | 1.89                     | 1.01              |
| 1:A:217:ALA:O    | 4:S:142:ILE:CB   | 2.00                     | 1.01              |
| 1:A:253:ILE:CG1  | 1:A:281:LEU:HD13 | 1.90                     | 1.01              |
| 2:B:70:MET:HE1   | 2:B:104:TYR:O    | 1.59                     | 1.01              |
| 2:B:178:ILE:HG21 | 2:B:214:ALA:O    | 1.60                     | 1.01              |
| 2:B:219:TYR:O    | 2:B:223:LEU:CD2  | 2.08                     | 1.01              |
| 2:B:293:VAL:O    | 2:B:299:LEU:HB2  | 1.58                     | 1.01              |
| 2:B:513:TRP:HA   | 2:B:551:LEU:HD22 | 1.02                     | 1.01              |
| 3:M:101:LEU:CG   | 3:M:106:LYS:CA   | 2.17                     | 1.01              |
| 3:M:212:ASN:CB   | 3:M:250:LEU:HD23 | 1.90                     | 1.01              |
| 3:M:256:VAL:HG12 | 3:M:290:PHE:HB3  | 1.39                     | 1.01              |
| 3:M:342:LEU:CD1  | 3:M:411:LEU:CB   | 2.37                     | 1.01              |
| 4:S:56:SER:O     | 4:S:60:SER:HB2   | 1.61                     | 1.01              |
| 1:A:253:ILE:CD1  | 1:A:281:LEU:HD22 | 1.88                     | 1.01              |
| 2:B:171:GLY:HA3  | 2:B:207:VAL:HG13 | 1.04                     | 1.01              |
| 2:B:182:ARG:HD2  | 2:B:217:GLU:OE1  | 1.61                     | 1.01              |
| 2:B:549:LEU:HD13 | 2:B:611:ALA:CB   | 1.89                     | 1.01              |
| 2:B:562:ASN:HB3  | 2:B:580:TYR:HB3  | 1.39                     | 1.01              |
| 3:M:443:SER:OG   | 3:M:447:ILE:O    | 1.77                     | 1.01              |
| 1:A:147:LEU:HD22 | 1:A:166:LEU:HD23 | 1.35                     | 1.01              |
| 1:A:295:VAL:HG11 | 1:A:319:LEU:HD11 | 1.42                     | 1.01              |
| 1:A:398:GLU:O    | 1:A:420:ILE:HG13 | 1.61                     | 1.01              |
| 1:A:426:ILE:HG13 | 1:A:464:ILE:HD13 | 1.40                     | 1.01              |
| 2:B:120:ILE:CG2  | 2:B:154:ILE:HG13 | 1.90                     | 1.01              |
| 2:B:174:ALA:HB1  | 2:B:211:ALA:HA   | 1.40                     | 1.01              |
| 2:B:291:TYR:CE2  | 2:B:294:VAL:CB   | 2.43                     | 1.01              |
| 2:B:513:TRP:CG   | 2:B:551:LEU:HD21 | 1.96                     | 1.01              |
| 2:B:559:ASP:HB3  | 2:B:563:PHE:CD1  | 1.93                     | 1.01              |
| 3:M:257:ALA:O    | 3:M:452:ILE:HG23 | 1.58                     | 1.01              |
| 3:M:378:ILE:O    | 3:M:413:GLY:CA   | 2.07                     | 1.01              |
| 1:A:105:VAL:HG23 | 4:S:167:ILE:CG1  | 1.90                     | 1.01              |

*Continued on next page...*



*Continued from previous page...*

| Atom-1           | Atom-2           | Interatomic distance (Å) | Clash overlap (Å) |
|------------------|------------------|--------------------------|-------------------|
| 1:A:136:GLY:O    | 1:A:139:ASP:CB   | 2.09                     | 1.01              |
| 1:A:516:ILE:HD13 | 1:A:551:LEU:HA   | 1.42                     | 1.01              |
| 2:B:178:ILE:CD1  | 2:B:215:TYR:HA   | 1.89                     | 1.01              |
| 3:M:16:PHE:CZ    | 3:M:18:TYR:HB2   | 1.96                     | 1.01              |
| 3:M:339:GLU:CG   | 3:M:412:ARG:HG2  | 1.90                     | 1.01              |
| 3:M:379:LEU:CD2  | 3:M:386:PHE:HB2  | 1.90                     | 1.01              |
| 4:S:48:SER:CA    | 4:S:77:TYR:HB2   | 1.91                     | 1.01              |
| 2:B:77:ILE:CG2   | 2:B:82:TYR:HE1   | 1.73                     | 1.00              |
| 2:B:127:LEU:HB3  | 2:B:157:THR:HG23 | 1.04                     | 1.00              |
| 2:B:178:ILE:HD11 | 2:B:215:TYR:CA   | 1.91                     | 1.00              |
| 2:B:230:PHE:O    | 2:B:231:ARG:O    | 1.79                     | 1.00              |
| 2:B:303:LEU:HD11 | 2:B:333:GLN:CG   | 1.91                     | 1.00              |
| 2:B:393:ILE:CG2  | 2:B:431:MET:CB   | 2.38                     | 1.00              |
| 2:B:497:LEU:CD2  | 2:B:533:LEU:CD2  | 2.38                     | 1.00              |
| 2:B:508:ARG:HB2  | 2:B:544:THR:CG2  | 1.91                     | 1.00              |
| 2:B:508:ARG:HB2  | 2:B:544:THR:HG23 | 1.37                     | 1.00              |
| 4:S:53:THR:HG22  | 4:S:57:LEU:HB2   | 1.39                     | 1.00              |
| 1:A:288:THR:CG2  | 1:A:322:PHE:HZ   | 1.71                     | 1.00              |
| 1:A:429:VAL:CG1  | 1:A:469:LEU:HD11 | 1.90                     | 1.00              |
| 2:B:77:ILE:CG2   | 2:B:82:TYR:CE1   | 2.44                     | 1.00              |
| 2:B:127:LEU:HB3  | 2:B:161:LEU:HD11 | 1.39                     | 1.00              |
| 2:B:223:LEU:HD23 | 2:B:255:TYR:CE1  | 1.93                     | 1.00              |
| 2:B:226:LEU:HB3  | 2:B:255:TYR:CZ   | 1.85                     | 1.00              |
| 3:M:344:ILE:CG2  | 3:M:347:PHE:HB3  | 1.90                     | 1.00              |
| 4:S:73:ILE:HG22  | 4:S:88:ILE:HG23  | 1.41                     | 1.00              |
| 4:S:80:TYR:O     | 4:S:81:ALA:C     | 1.98                     | 1.00              |
| 1:A:178:ARG:CD   | 1:A:209:ASP:OD2  | 2.08                     | 1.00              |
| 1:A:254:ILE:CG1  | 1:A:290:VAL:HG22 | 1.91                     | 1.00              |
| 2:B:108:PHE:CE2  | 2:B:115:LEU:CG   | 2.43                     | 1.00              |
| 2:B:185:LYS:HG3  | 2:B:222:HIS:CE1  | 1.96                     | 1.00              |
| 2:B:189:HIS:NE2  | 2:B:193:LEU:HD11 | 1.75                     | 1.00              |
| 2:B:393:ILE:HG23 | 2:B:431:MET:HB3  | 1.42                     | 1.00              |
| 2:B:404:ASN:O    | 2:B:405:GLU:C    | 1.80                     | 1.00              |
| 2:B:447:GLU:OE1  | 2:B:485:LYS:HG3  | 1.61                     | 1.00              |
| 3:M:327:PHE:CE1  | 3:M:336:ASP:HB2  | 1.97                     | 1.00              |
| 3:M:339:GLU:CG   | 3:M:412:ARG:NE   | 2.23                     | 1.00              |
| 1:A:104:ARG:HG3  | 1:A:145:ILE:HG13 | 1.41                     | 1.00              |
| 1:A:104:ARG:CG   | 1:A:145:ILE:HG13 | 1.91                     | 1.00              |
| 1:A:141:VAL:HG21 | 4:S:158:LYS:N    | 1.77                     | 1.00              |
| 1:A:244:LEU:CD2  | 1:A:277:LYS:O    | 2.10                     | 1.00              |
| 1:A:408:ILE:HG21 | 4:S:64:ASN:C     | 1.82                     | 1.00              |

*Continued on next page...*

*Continued from previous page...*

| Atom-1           | Atom-2           | Interatomic distance (Å) | Clash overlap (Å) |
|------------------|------------------|--------------------------|-------------------|
| 2:B:546:CYS:SG   | 2:B:607:ILE:CG1  | 2.40                     | 1.00              |
| 3:M:290:PHE:CZ   | 3:M:297:PHE:CD1  | 2.49                     | 1.00              |
| 1:A:217:ALA:HB2  | 4:S:142:ILE:HG13 | 1.43                     | 1.00              |
| 1:A:408:ILE:HG23 | 4:S:64:ASN:HB3   | 1.01                     | 1.00              |
| 2:B:158:VAL:HG12 | 2:B:195:ILE:HG21 | 1.40                     | 1.00              |
| 3:M:217:ASP:OD1  | 3:M:471:LYS:HA   | 1.58                     | 1.00              |
| 3:M:353:VAL:HG23 | 3:M:438:SER:O    | 1.61                     | 1.00              |
| 1:A:166:LEU:HD12 | 1:A:185:LEU:HD23 | 1.41                     | 1.00              |
| 1:A:220:SER:CB   | 4:S:142:ILE:CG2  | 2.32                     | 1.00              |
| 1:A:528:ASN:O    | 1:A:529:GLY:C    | 1.92                     | 1.00              |
| 1:A:633:PHE:HE1  | 2:B:513:TRP:CE3  | 1.33                     | 1.00              |
| 2:B:380:LYS:NZ   | 3:M:236:LEU:HG   | 1.76                     | 1.00              |
| 2:B:487:LEU:HD21 | 2:B:522:GLU:HB3  | 1.43                     | 1.00              |
| 3:M:244:VAL:HA   | 3:M:472:TYR:HD2  | 1.26                     | 1.00              |
| 3:M:379:LEU:HD23 | 3:M:386:PHE:HB2  | 1.41                     | 1.00              |
| 2:B:182:ARG:HD2  | 2:B:217:GLU:HB3  | 1.41                     | 1.00              |
| 3:M:65:TYR:CZ    | 3:M:86:PRO:CB    | 2.44                     | 1.00              |
| 3:M:69:ILE:HG13  | 3:M:90:PHE:CE1   | 1.97                     | 1.00              |
| 1:A:429:VAL:HB   | 1:A:469:LEU:HD11 | 1.03                     | 0.99              |
| 1:A:629:LEU:CG   | 2:B:610:ARG:HH11 | 1.74                     | 0.99              |
| 2:B:120:ILE:HG23 | 2:B:154:ILE:HG13 | 1.43                     | 0.99              |
| 3:M:326:HIS:O    | 3:M:338:PHE:HA   | 1.61                     | 0.99              |
| 4:S:131:VAL:HG22 | 4:S:153:VAL:HG22 | 1.40                     | 0.99              |
| 2:B:80:GLN:HG2   | 2:B:115:LEU:CD1  | 1.91                     | 0.99              |
| 2:B:303:LEU:HD13 | 2:B:333:GLN:HB3  | 1.05                     | 0.99              |
| 2:B:307:ASN:OD1  | 2:B:339:PHE:CE2  | 2.15                     | 0.99              |
| 2:B:513:TRP:HA   | 2:B:551:LEU:CD1  | 1.83                     | 0.99              |
| 1:A:275:LEU:CD1  | 1:A:308:ASP:CG   | 2.31                     | 0.99              |
| 1:A:388:VAL:HG13 | 1:A:432:ILE:HD12 | 1.03                     | 0.99              |
| 2:B:106:LEU:HD11 | 2:B:144:ASP:HB3  | 1.02                     | 0.99              |
| 3:M:101:LEU:HD21 | 3:M:106:LYS:O    | 1.62                     | 0.99              |
| 2:B:63:MET:HG3   | 2:B:100:LEU:HB3  | 1.44                     | 0.99              |
| 2:B:219:TYR:OH   | 2:B:226:LEU:CA   | 2.05                     | 0.99              |
| 3:M:339:GLU:CG   | 3:M:412:ARG:HE   | 1.75                     | 0.99              |
| 1:A:101:GLN:NE2  | 4:S:167:ILE:CG2  | 2.25                     | 0.99              |
| 2:B:37:TYR:CE2   | 2:B:38:TYR:CE1   | 2.50                     | 0.99              |
| 2:B:162:VAL:CG2  | 2:B:199:LEU:CD1  | 2.40                     | 0.99              |
| 2:B:523:PHE:CD1  | 2:B:559:ASP:OD1  | 2.16                     | 0.99              |
| 2:B:549:LEU:CD2  | 2:B:607:ILE:O    | 2.10                     | 0.99              |
| 3:M:245:ASP:CA   | 3:M:472:TYR:CD1  | 2.45                     | 0.99              |
| 3:M:290:PHE:CE1  | 3:M:297:PHE:CE1  | 2.50                     | 0.99              |

*Continued on next page...*

*Continued from previous page...*

| Atom-1           | Atom-2           | Interatomic distance (Å) | Clash overlap (Å) |
|------------------|------------------|--------------------------|-------------------|
| 4:S:34:GLN:OE1   | 4:S:58:LEU:CG    | 2.09                     | 0.99              |
| 1:A:88:ASN:O     | 1:A:89:PHE:C     | 1.91                     | 0.99              |
| 1:A:128:LEU:CD1  | 1:A:150:LEU:HD23 | 1.87                     | 0.99              |
| 1:A:638:LEU:HD12 | 2:B:518:ILE:HG23 | 1.42                     | 0.99              |
| 2:B:121:ASN:OD1  | 2:B:153:ILE:HD11 | 1.59                     | 0.99              |
| 2:B:159:LYS:HA   | 2:B:195:ILE:HD11 | 1.00                     | 0.99              |
| 2:B:490:ILE:CG2  | 2:B:515:PHE:CE2  | 2.44                     | 0.99              |
| 2:B:519:ALA:O    | 2:B:523:PHE:CG   | 2.15                     | 0.99              |
| 4:S:6:LEU:HD22   | 4:S:32:LEU:HD22  | 1.42                     | 0.99              |
| 1:A:189:PHE:CD2  | 1:A:225:LEU:HD21 | 1.96                     | 0.99              |
| 2:B:225:LEU:CD1  | 2:B:283:TYR:CZ   | 2.45                     | 0.99              |
| 2:B:277:CYS:SG   | 2:B:292:GLU:CG   | 2.50                     | 0.99              |
| 2:B:592:TYR:OH   | 2:B:619:ASP:OD2  | 1.81                     | 0.99              |
| 1:A:264:SER:HB2  | 1:A:271:ARG:CD   | 1.93                     | 0.99              |
| 1:A:275:LEU:CD1  | 1:A:308:ASP:OD1  | 2.11                     | 0.99              |
| 1:A:287:ALA:HB3  | 1:A:289:SER:N    | 1.76                     | 0.99              |
| 1:A:563:CYS:HB3  | 1:A:621:LEU:HD12 | 1.41                     | 0.99              |
| 2:B:279:LEU:HG   | 2:B:288:TYR:CD1  | 1.96                     | 0.99              |
| 1:A:384:LEU:HD22 | 1:A:441:TYR:HE2  | 1.27                     | 0.99              |
| 2:B:83:PHE:HZ    | 2:B:119:SER:CB   | 1.51                     | 0.99              |
| 2:B:86:VAL:HG12  | 2:B:101:ILE:HG23 | 1.01                     | 0.99              |
| 2:B:243:TRP:HZ3  | 3:M:91:THR:HA    | 1.24                     | 0.99              |
| 2:B:530:LEU:HD11 | 2:B:595:VAL:CG2  | 1.92                     | 0.99              |
| 3:M:69:ILE:HD11  | 3:M:90:PHE:CZ    | 1.66                     | 0.99              |
| 1:A:179:LYS:CE   | 4:S:143:GLU:CB   | 2.36                     | 0.99              |
| 1:A:217:ALA:CB   | 4:S:142:ILE:HG13 | 1.90                     | 0.99              |
| 2:B:303:LEU:HD11 | 2:B:333:GLN:NE2  | 1.77                     | 0.99              |
| 2:B:309:LEU:HB3  | 2:B:317:VAL:HG11 | 1.41                     | 0.99              |
| 3:M:224:VAL:HG23 | 3:M:479:PHE:CD1  | 1.98                     | 0.99              |
| 4:S:8:PHE:HB3    | 4:S:36:TYR:CZ    | 1.98                     | 0.99              |
| 4:S:54:PRO:CG    | 4:S:57:LEU:HD11  | 1.89                     | 0.99              |
| 1:A:128:LEU:HD13 | 1:A:150:LEU:HG   | 1.39                     | 0.98              |
| 2:B:60:ARG:HD2   | 2:B:96:LYS:HG2   | 1.41                     | 0.98              |
| 2:B:274:PRO:CG   | 2:B:295:ASN:CG   | 2.32                     | 0.98              |
| 2:B:459:GLU:HA   | 2:B:496:LEU:HD22 | 1.44                     | 0.98              |
| 3:M:66:PHE:HB3   | 3:M:77:LEU:CD1   | 1.90                     | 0.98              |
| 1:A:183:THR:OG1  | 4:S:142:ILE:CD1  | 2.11                     | 0.98              |
| 2:B:50:LEU:HB3   | 2:B:62:ALA:HB2   | 1.43                     | 0.98              |
| 2:B:178:ILE:HG22 | 2:B:179:LYS:N    | 1.76                     | 0.98              |
| 2:B:350:THR:HB   | 2:B:352:ASN:ND2  | 1.78                     | 0.98              |
| 3:M:293:PRO:HD2  | 3:M:293:PRO:O    | 1.61                     | 0.98              |

*Continued on next page...*

*Continued from previous page...*

| Atom-1           | Atom-2           | Interatomic distance (Å) | Clash overlap (Å) |
|------------------|------------------|--------------------------|-------------------|
| 1:A:388:VAL:CG1  | 1:A:432:ILE:HD12 | 1.92                     | 0.98              |
| 2:B:127:LEU:CA   | 2:B:161:LEU:HD11 | 1.93                     | 0.98              |
| 2:B:307:ASN:OD1  | 2:B:339:PHE:CD2  | 2.15                     | 0.98              |
| 2:B:490:ILE:HG22 | 2:B:515:PHE:CE2  | 1.97                     | 0.98              |
| 1:A:84:MET:O     | 1:A:85:ALA:C     | 1.93                     | 0.98              |
| 2:B:78:ASP:OD2   | 2:B:81:LEU:HG    | 1.62                     | 0.98              |
| 2:B:86:VAL:HG13  | 2:B:101:ILE:HG12 | 1.45                     | 0.98              |
| 2:B:230:PHE:CZ   | 2:B:252:LEU:HD23 | 1.80                     | 0.98              |
| 2:B:261:PRO:HA   | 2:B:290:SER:CB   | 1.93                     | 0.98              |
| 2:B:530:LEU:HD11 | 2:B:595:VAL:HG21 | 1.45                     | 0.98              |
| 2:B:549:LEU:HD11 | 2:B:611:ALA:HA   | 0.99                     | 0.98              |
| 3:M:67:SER:OG    | 3:M:90:PHE:CG    | 2.16                     | 0.98              |
| 1:A:132:LEU:CD2  | 1:A:169:MET:HG3  | 1.93                     | 0.98              |
| 1:A:215:VAL:CG2  | 1:A:243:ILE:CD1  | 2.36                     | 0.98              |
| 1:A:408:ILE:CG2  | 4:S:65:ASN:N     | 2.14                     | 0.98              |
| 2:B:105:LEU:HG   | 2:B:119:SER:HB2  | 1.44                     | 0.98              |
| 2:B:296:ASP:OD1  | 2:B:297:PRO:HD2  | 1.63                     | 0.98              |
| 1:A:88:ASN:HB3   | 1:A:120:ILE:HD12 | 0.99                     | 0.98              |
| 1:A:589:SER:O    | 1:A:597:GLN:HG3  | 1.61                     | 0.98              |
| 2:B:268:LYS:O    | 2:B:273:SER:CB   | 2.12                     | 0.98              |
| 2:B:527:PRO:HB2  | 2:B:587:ARG:CG   | 1.93                     | 0.98              |
| 4:S:130:SER:OG   | 4:S:156:LEU:HD12 | 1.59                     | 0.98              |
| 1:A:320:HIS:HB2  | 1:A:352:PHE:CE2  | 1.99                     | 0.98              |
| 1:A:332:TYR:HD1  | 1:A:366:SER:OG   | 1.21                     | 0.98              |
| 1:A:408:ILE:HG23 | 4:S:64:ASN:HB2   | 0.99                     | 0.98              |
| 2:B:2:VAL:HG13   | 2:B:6:HIS:NE2    | 1.79                     | 0.98              |
| 2:B:243:TRP:CZ3  | 3:M:91:THR:O     | 2.16                     | 0.98              |
| 2:B:275:ARG:CG   | 2:B:291:TYR:CD2  | 2.47                     | 0.98              |
| 2:B:508:ARG:CB   | 2:B:544:THR:CG2  | 2.42                     | 0.98              |
| 2:B:549:LEU:CG   | 2:B:611:ALA:HB2  | 1.93                     | 0.98              |
| 3:M:66:PHE:HA    | 3:M:77:LEU:CD1   | 1.94                     | 0.98              |
| 1:A:101:GLN:C    | 4:S:167:ILE:CG1  | 2.30                     | 0.98              |
| 1:A:516:ILE:CG2  | 1:A:554:ALA:CB   | 2.34                     | 0.98              |
| 2:B:25:VAL:HG11  | 2:B:36:THR:HG1   | 1.26                     | 0.98              |
| 2:B:140:SER:CA   | 2:B:172:GLU:OE1  | 2.11                     | 0.98              |
| 2:B:275:ARG:HG3  | 2:B:294:VAL:HG11 | 1.02                     | 0.98              |
| 2:B:353:GLN:CG   | 3:M:49:ASP:N     | 2.19                     | 0.98              |
| 1:A:142:LYS:HA   | 4:S:159:ALA:HB1  | 1.42                     | 0.98              |
| 1:A:288:THR:CG2  | 1:A:322:PHE:CE2  | 2.39                     | 0.98              |
| 2:B:223:LEU:CD1  | 2:B:259:TYR:CB   | 2.31                     | 0.98              |
| 2:B:517:GLU:OE2  | 2:B:554:LYS:NZ   | 1.96                     | 0.98              |

*Continued on next page...*

*Continued from previous page...*

| Atom-1           | Atom-2           | Interatomic distance (Å) | Clash overlap (Å) |
|------------------|------------------|--------------------------|-------------------|
| 1:A:211:ASP:OD1  | 4:S:148:ARG:NE   | 1.96                     | 0.98              |
| 1:A:537:THR:HB   | 1:A:584:PHE:CE1  | 1.99                     | 0.98              |
| 2:B:37:TYR:CZ    | 2:B:46:GLN:NE2   | 1.78                     | 0.98              |
| 2:B:212:VAL:CG2  | 2:B:248:LEU:CD2  | 2.42                     | 0.98              |
| 2:B:275:ARG:CB   | 2:B:291:TYR:HD2  | 1.76                     | 0.98              |
| 2:B:582:ASP:O    | 2:B:584:SER:N    | 1.96                     | 0.98              |
| 1:A:105:VAL:CG2  | 4:S:167:ILE:HD13 | 1.75                     | 0.97              |
| 1:A:219:VAL:C    | 1:A:259:LEU:HD12 | 1.81                     | 0.97              |
| 1:A:275:LEU:HD13 | 1:A:308:ASP:CG   | 1.83                     | 0.97              |
| 2:B:566:ALA:HA   | 2:B:574:ASN:CG   | 1.83                     | 0.97              |
| 3:M:281:GLY:O    | 3:M:282:VAL:HG23 | 0.80                     | 0.97              |
| 4:S:109:LEU:HD11 | 4:S:113:PHE:CE1  | 1.92                     | 0.97              |
| 1:A:96:SER:N     | 4:S:166:LYS:NZ   | 2.10                     | 0.97              |
| 1:A:96:SER:HA    | 1:A:127:LEU:CD1  | 1.94                     | 0.97              |
| 1:A:217:ALA:CA   | 4:S:142:ILE:CB   | 1.92                     | 0.97              |
| 2:B:86:VAL:HG12  | 2:B:101:ILE:CG2  | 1.93                     | 0.97              |
| 2:B:90:ILE:HD13  | 2:B:123:LEU:HD23 | 1.46                     | 0.97              |
| 2:B:279:LEU:CG   | 2:B:288:TYR:HD1  | 1.76                     | 0.97              |
| 2:B:377:TYR:O    | 2:B:380:LYS:HB2  | 1.62                     | 0.97              |
| 2:B:418:TYR:CD1  | 2:B:418:TYR:C    | 2.33                     | 0.97              |
| 2:B:553:ALA:CB   | 2:B:614:ILE:HG12 | 1.93                     | 0.97              |
| 3:M:241:HIS:HB2  | 3:M:476:THR:CG2  | 1.93                     | 0.97              |
| 1:A:107:TYR:CE2  | 1:A:128:LEU:HD23 | 1.96                     | 0.97              |
| 3:M:217:ASP:HB3  | 3:M:471:LYS:N    | 1.78                     | 0.97              |
| 2:B:37:TYR:CD2   | 2:B:38:TYR:CE1   | 2.52                     | 0.97              |
| 2:B:191:GLU:O    | 2:B:193:LEU:N    | 1.97                     | 0.97              |
| 2:B:196:LEU:O    | 2:B:215:TYR:OH   | 1.82                     | 0.97              |
| 2:B:212:VAL:HG21 | 2:B:248:LEU:HD21 | 1.46                     | 0.97              |
| 3:M:65:TYR:CD1   | 3:M:86:PRO:HG3   | 2.00                     | 0.97              |
| 4:S:5:VAL:HG11   | 4:S:132:LEU:CD2  | 1.94                     | 0.97              |
| 4:S:8:PHE:HE1    | 4:S:84:TYR:CB    | 1.70                     | 0.97              |
| 1:A:323:CYS:SG   | 1:A:338:PHE:HE1  | 1.86                     | 0.97              |
| 1:A:627:GLU:CB   | 2:B:617:LEU:HB3  | 1.91                     | 0.97              |
| 1:A:633:PHE:CD1  | 2:B:550:VAL:HG11 | 1.94                     | 0.97              |
| 2:B:70:MET:CE    | 2:B:107:ARG:CG   | 2.41                     | 0.97              |
| 2:B:208:ILE:CG1  | 2:B:236:ILE:HG21 | 1.92                     | 0.97              |
| 2:B:223:LEU:HD13 | 2:B:259:TYR:N    | 1.68                     | 0.97              |
| 3:M:347:PHE:HE1  | 3:M:439:TYR:CD2  | 1.83                     | 0.97              |
| 4:S:53:THR:HG21  | 4:S:67:GLU:C     | 1.83                     | 0.97              |
| 2:B:102:HIS:HD1  | 2:B:137:PHE:HB3  | 1.26                     | 0.97              |
| 2:B:219:TYR:CB   | 2:B:255:TYR:CD1  | 2.46                     | 0.97              |

*Continued on next page...*

*Continued from previous page...*

| Atom-1           | Atom-2           | Interatomic distance (Å) | Clash overlap (Å) |
|------------------|------------------|--------------------------|-------------------|
| 2:B:343:LEU:CD1  | 2:B:359:LEU:CD1  | 2.38                     | 0.97              |
| 2:B:346:THR:CG2  | 2:B:350:THR:HG23 | 1.94                     | 0.97              |
| 3:M:273:HIS:HB2  | 3:M:298:ARG:O    | 1.62                     | 0.97              |
| 3:M:360:LEU:CD2  | 3:M:362:PHE:CE2  | 2.47                     | 0.97              |
| 1:A:92:LEU:CD2   | 1:A:120:ILE:O    | 2.12                     | 0.97              |
| 1:A:212:ILE:HB   | 1:A:247:ILE:CD1  | 1.95                     | 0.97              |
| 1:A:399:ASP:O    | 1:A:420:ILE:C    | 2.02                     | 0.97              |
| 2:B:116:THR:HG22 | 2:B:150:LEU:CD1  | 1.94                     | 0.97              |
| 2:B:127:LEU:CB   | 2:B:161:LEU:HD11 | 1.94                     | 0.97              |
| 2:B:181:TYR:CE2  | 2:B:222:HIS:N    | 2.32                     | 0.97              |
| 2:B:344:VAL:HG22 | 2:B:363:ILE:HD11 | 1.46                     | 0.97              |
| 3:M:319:SER:CB   | 3:M:346:ASN:N    | 2.25                     | 0.97              |
| 1:A:630:PRO:O    | 2:B:554:LYS:HA   | 1.62                     | 0.97              |
| 2:B:38:TYR:CD2   | 2:B:65:ARG:HD3   | 1.96                     | 0.97              |
| 3:M:95:THR:O     | 3:M:99:ILE:CD1   | 2.13                     | 0.97              |
| 3:M:246:VAL:HA   | 3:M:470:ALA:CB   | 1.93                     | 0.97              |
| 2:B:87:VAL:HG12  | 2:B:122:SER:HB3  | 0.97                     | 0.97              |
| 2:B:219:TYR:O    | 2:B:223:LEU:HG   | 1.65                     | 0.97              |
| 3:M:8:THR:N      | 3:M:75:TRP:O     | 1.96                     | 0.97              |
| 1:A:88:ASN:HB3   | 1:A:120:ILE:CD1  | 1.94                     | 0.97              |
| 1:A:557:LYS:NZ   | 2:B:604:GLU:HG3  | 1.78                     | 0.97              |
| 1:A:584:PHE:O    | 1:A:587:ASN:N    | 1.97                     | 0.97              |
| 1:A:636:TYR:HB2  | 2:B:554:LYS:NZ   | 1.78                     | 0.97              |
| 3:M:261:ASN:N    | 3:M:448:TYR:O    | 1.97                     | 0.97              |
| 1:A:166:LEU:HD13 | 1:A:185:LEU:HD23 | 1.45                     | 0.96              |
| 1:A:185:LEU:HD13 | 1:A:203:PHE:HE1  | 0.82                     | 0.96              |
| 1:A:255:ARG:HH22 | 4:S:135:ILE:HG22 | 1.29                     | 0.96              |
| 2:B:20:ARG:CD    | 2:B:21:GLU:CB    | 2.42                     | 0.96              |
| 2:B:79:VAL:CB    | 2:B:108:PHE:HE1  | 1.74                     | 0.96              |
| 2:B:219:TYR:HD1  | 2:B:226:LEU:HD22 | 1.21                     | 0.96              |
| 2:B:437:SER:HA   | 2:B:478:LEU:CD2  | 1.94                     | 0.96              |
| 2:B:549:LEU:CD2  | 2:B:611:ALA:H    | 1.51                     | 0.96              |
| 1:A:77:LEU:O     | 1:A:80:TYR:O     | 1.81                     | 0.96              |
| 2:B:38:TYR:HA    | 2:B:42:ILE:N     | 1.81                     | 0.96              |
| 2:B:291:TYR:HD2  | 2:B:294:VAL:HG11 | 0.82                     | 0.96              |
| 2:B:340:ILE:HG13 | 2:B:373:LEU:HD23 | 1.45                     | 0.96              |
| 2:B:394:TRP:HZ3  | 2:B:397:GLN:OE1  | 1.47                     | 0.96              |
| 3:M:224:VAL:N    | 3:M:479:PHE:HA   | 1.80                     | 0.96              |
| 3:M:302:TYR:CE2  | 3:M:445:SER:HB3  | 2.00                     | 0.96              |
| 1:A:151:SER:HB2  | 1:A:187:LYS:CB   | 1.94                     | 0.96              |
| 1:A:260:PHE:CZ   | 1:A:274:LEU:HD11 | 2.00                     | 0.96              |

*Continued on next page...*

*Continued from previous page...*

| Atom-1           | Atom-2           | Interatomic distance (Å) | Clash overlap (Å) |
|------------------|------------------|--------------------------|-------------------|
| 1:A:630:PRO:CG   | 2:B:614:ILE:CB   | 2.43                     | 0.96              |
| 2:B:274:PRO:HG2  | 2:B:295:ASN:ND2  | 1.80                     | 0.96              |
| 2:B:343:LEU:HD11 | 2:B:359:LEU:CA   | 1.94                     | 0.96              |
| 2:B:559:ASP:HB2  | 2:B:563:PHE:HD1  | 1.20                     | 0.96              |
| 3:M:244:VAL:CG1  | 3:M:472:TYR:CE2  | 2.47                     | 0.96              |
| 4:S:83:LEU:HD11  | 4:S:116:VAL:HG21 | 1.44                     | 0.96              |
| 1:A:176:TYR:HB3  | 4:S:155:GLU:CG   | 1.95                     | 0.96              |
| 2:B:278:PRO:CD   | 2:B:289:PRO:O    | 2.13                     | 0.96              |
| 3:M:4:SER:O      | 3:M:78:ALA:CB    | 1.90                     | 0.96              |
| 3:M:8:THR:C      | 3:M:75:TRP:HB2   | 1.86                     | 0.96              |
| 1:A:244:LEU:HD11 | 1:A:281:LEU:CD1  | 1.94                     | 0.96              |
| 1:A:637:GLU:HB3  | 2:B:516:GLY:CA   | 1.95                     | 0.96              |
| 2:B:44:PRO:O     | 2:B:47:LEU:HB2   | 1.65                     | 0.96              |
| 3:M:101:LEU:HA   | 3:M:109:LEU:HD13 | 1.46                     | 0.96              |
| 3:M:319:SER:CB   | 3:M:346:ASN:CA   | 2.42                     | 0.96              |
| 1:A:103:LYS:HG3  | 4:S:163:THR:HG22 | 1.44                     | 0.96              |
| 1:A:540:ILE:HG13 | 1:A:551:LEU:HD23 | 1.46                     | 0.96              |
| 2:B:197:LYS:HB2  | 2:B:229:HIS:NE2  | 1.80                     | 0.96              |
| 2:B:216:LYS:HA   | 2:B:251:LEU:HD11 | 0.97                     | 0.96              |
| 1:A:93:GLU:O     | 4:S:166:LYS:NZ   | 1.89                     | 0.96              |
| 2:B:139:LEU:HD22 | 2:B:173:VAL:HA   | 1.48                     | 0.96              |
| 2:B:159:LYS:HE3  | 2:B:191:GLU:OE1  | 1.64                     | 0.96              |
| 3:M:222:PHE:O    | 3:M:479:PHE:HE2  | 1.23                     | 0.96              |
| 3:M:226:PHE:CZ   | 3:M:321:GLY:O    | 2.18                     | 0.96              |
| 2:B:212:VAL:HG22 | 2:B:248:LEU:CD2  | 1.95                     | 0.96              |
| 2:B:343:LEU:CD2  | 2:B:362:ALA:CB   | 2.38                     | 0.96              |
| 2:B:343:LEU:CD1  | 2:B:359:LEU:HA   | 1.94                     | 0.96              |
| 1:A:65:ASN:C     | 4:S:165:SER:CB   | 2.34                     | 0.96              |
| 1:A:506:LYS:HE2  | 3:M:58:ARG:HA    | 1.46                     | 0.96              |
| 2:B:151:ALA:CA   | 2:B:180:LEU:HD11 | 1.70                     | 0.96              |
| 2:B:286:ILE:HG23 | 2:B:288:TYR:CE2  | 2.00                     | 0.96              |
| 2:B:389:ILE:CG2  | 2:B:427:ASN:HB2  | 1.96                     | 0.96              |
| 3:M:283:PHE:CE2  | 3:M:289:THR:HB   | 1.98                     | 0.96              |
| 2:B:366:LEU:O    | 2:B:367:SER:C    | 1.85                     | 0.95              |
| 3:M:101:LEU:HD11 | 3:M:106:LYS:C    | 1.85                     | 0.95              |
| 4:S:109:LEU:CD1  | 4:S:113:PHE:HE1  | 1.78                     | 0.95              |
| 2:B:48:VAL:HG23  | 2:B:82:TYR:HE2   | 1.30                     | 0.95              |
| 2:B:117:LEU:HD21 | 2:B:149:SER:HG   | 1.18                     | 0.95              |
| 1:A:101:GLN:HG3  | 4:S:160:ALA:HB3  | 1.46                     | 0.95              |
| 1:A:316:LEU:HD13 | 1:A:348:PHE:CG   | 2.01                     | 0.95              |
| 2:B:80:GLN:CG    | 2:B:115:LEU:HD11 | 1.94                     | 0.95              |

*Continued on next page...*

*Continued from previous page...*

| Atom-1           | Atom-2           | Interatomic distance (Å) | Clash overlap (Å) |
|------------------|------------------|--------------------------|-------------------|
| 2:B:363:ILE:HG21 | 2:B:398:ILE:CD1  | 1.96                     | 0.95              |
| 3:M:6:TYR:CD2    | 3:M:17:GLN:HA    | 2.00                     | 0.95              |
| 3:M:339:GLU:CG   | 3:M:412:ARG:CD   | 2.44                     | 0.95              |
| 3:M:433:VAL:HG12 | 3:M:481:VAL:HB   | 1.47                     | 0.95              |
| 4:S:135:ILE:O    | 4:S:141:VAL:CA   | 2.13                     | 0.95              |
| 1:A:186:PHE:CE1  | 1:A:224:GLU:CG   | 2.50                     | 0.95              |
| 2:B:230:PHE:HE1  | 2:B:252:LEU:HD23 | 1.15                     | 0.95              |
| 3:M:243:ILE:O    | 3:M:472:TYR:CB   | 2.14                     | 0.95              |
| 1:A:64:LEU:CG    | 1:A:102:GLN:HE22 | 1.79                     | 0.95              |
| 1:A:253:ILE:HG12 | 1:A:281:LEU:HD13 | 0.96                     | 0.95              |
| 2:B:79:VAL:HB    | 2:B:108:PHE:HE1  | 1.17                     | 0.95              |
| 2:B:559:ASP:CB   | 2:B:563:PHE:CE1  | 2.45                     | 0.95              |
| 3:M:101:LEU:CD1  | 3:M:106:LYS:C    | 2.34                     | 0.95              |
| 4:S:25:LEU:HB2   | 4:S:26:PRO:HD3   | 1.49                     | 0.95              |
| 2:B:37:TYR:CE2   | 2:B:38:TYR:HE1   | 1.84                     | 0.95              |
| 2:B:211:ALA:O    | 2:B:214:ALA:HB3  | 1.65                     | 0.95              |
| 3:M:71:LYS:O     | 3:M:72:LEU:HB2   | 1.65                     | 0.95              |
| 3:M:244:VAL:HA   | 3:M:472:TYR:CG   | 2.02                     | 0.95              |
| 4:S:89:VAL:HG11  | 4:S:98:ILE:HG21  | 1.45                     | 0.95              |
| 1:A:64:LEU:CB    | 1:A:102:GLN:HE22 | 1.78                     | 0.95              |
| 1:A:140:VAL:CA   | 1:A:177:ILE:HG13 | 1.86                     | 0.95              |
| 1:A:258:LYS:NZ   | 4:S:97:ALA:HB2   | 1.80                     | 0.95              |
| 2:B:127:LEU:HD13 | 2:B:157:THR:CB   | 1.97                     | 0.95              |
| 2:B:185:LYS:HG3  | 2:B:222:HIS:NE2  | 1.82                     | 0.95              |
| 3:M:243:ILE:O    | 3:M:472:TYR:HD2  | 1.49                     | 0.95              |
| 3:M:323:MET:HE3  | 3:M:342:LEU:HD23 | 1.49                     | 0.95              |
| 1:A:186:PHE:CE1  | 1:A:224:GLU:HB2  | 2.02                     | 0.95              |
| 1:A:403:LEU:CD2  | 1:A:422:GLU:HG3  | 1.97                     | 0.95              |
| 2:B:196:LEU:HB3  | 2:B:215:TYR:CE2  | 2.01                     | 0.95              |
| 2:B:268:LYS:O    | 2:B:273:SER:HB3  | 1.65                     | 0.95              |
| 3:M:51:LEU:HD13  | 3:M:75:TRP:CZ3   | 2.01                     | 0.95              |
| 4:S:89:VAL:HG11  | 4:S:98:ILE:CG2   | 1.95                     | 0.95              |
| 1:A:163:ALA:HB2  | 1:A:195:ALA:HB1  | 0.96                     | 0.95              |
| 1:A:251:TRP:HZ2  | 4:S:103:GLN:HB3  | 1.26                     | 0.95              |
| 2:B:42:ILE:CD1   | 2:B:65:ARG:HD3   | 1.95                     | 0.95              |
| 2:B:174:ALA:CB   | 2:B:211:ALA:CA   | 2.44                     | 0.95              |
| 2:B:174:ALA:CB   | 2:B:211:ALA:CB   | 2.44                     | 0.95              |
| 2:B:178:ILE:HG13 | 2:B:214:ALA:CA   | 1.97                     | 0.95              |
| 2:B:437:SER:O    | 2:B:478:LEU:CD2  | 2.14                     | 0.95              |
| 3:M:18:TYR:CD1   | 3:M:122:SER:OG   | 2.20                     | 0.95              |
| 3:M:218:LEU:O    | 3:M:441:GLY:N    | 2.00                     | 0.95              |

*Continued on next page...*



*Continued from previous page...*

| Atom-1           | Atom-2           | Interatomic distance (Å) | Clash overlap (Å) |
|------------------|------------------|--------------------------|-------------------|
| 3:M:222:PHE:CB   | 3:M:479:PHE:CZ   | 2.49                     | 0.95              |
| 1:A:145:ILE:CD1  | 4:S:156:LEU:HD22 | 1.97                     | 0.95              |
| 1:A:186:PHE:CE1  | 1:A:224:GLU:HG2  | 2.02                     | 0.95              |
| 1:A:610:SER:OG   | 1:A:625:LEU:HD13 | 1.67                     | 0.95              |
| 1:A:147:LEU:HD13 | 1:A:166:LEU:HD22 | 1.47                     | 0.94              |
| 1:A:217:ALA:HA   | 4:S:142:ILE:CG1  | 1.95                     | 0.94              |
| 2:B:117:LEU:CD2  | 2:B:149:SER:OG   | 2.14                     | 0.94              |
| 2:B:158:VAL:HG11 | 2:B:177:ILE:HG12 | 0.96                     | 0.94              |
| 2:B:178:ILE:CG1  | 2:B:214:ALA:HB1  | 1.97                     | 0.94              |
| 3:M:7:ILE:HG12   | 3:M:76:CYS:SG    | 2.07                     | 0.94              |
| 3:M:347:PHE:CE1  | 3:M:439:TYR:HD2  | 1.84                     | 0.94              |
| 1:A:64:LEU:CB    | 1:A:102:GLN:NE2  | 2.30                     | 0.94              |
| 1:A:101:GLN:HG3  | 4:S:160:ALA:HB1  | 0.95                     | 0.94              |
| 1:A:581:LEU:HD23 | 1:A:607:LEU:CD2  | 1.96                     | 0.94              |
| 2:B:12:LEU:O     | 2:B:16:LYS:CB    | 2.13                     | 0.94              |
| 2:B:175:LEU:CD2  | 2:B:210:CYS:O    | 2.14                     | 0.94              |
| 2:B:267:ASP:H    | 2:B:289:PRO:HB2  | 1.32                     | 0.94              |
| 3:M:67:SER:CB    | 3:M:90:PHE:HD1   | 1.78                     | 0.94              |
| 1:A:102:GLN:CD   | 4:S:166:LYS:H    | 1.70                     | 0.94              |
| 1:A:366:SER:O    | 1:A:370:LYS:HG2  | 1.66                     | 0.94              |
| 1:A:520:GLY:CA   | 1:A:558:VAL:CG2  | 2.42                     | 0.94              |
| 2:B:123:LEU:CD1  | 2:B:142:LEU:CD2  | 2.39                     | 0.94              |
| 2:B:394:TRP:CZ3  | 2:B:397:GLN:OE1  | 2.20                     | 0.94              |
| 1:A:264:SER:HB2  | 1:A:271:ARG:HD3  | 1.49                     | 0.94              |
| 1:A:408:ILE:HD12 | 1:A:410:TYR:CE1  | 2.03                     | 0.94              |
| 2:B:143:SER:O    | 2:B:145:MET:N    | 1.99                     | 0.94              |
| 2:B:226:LEU:CB   | 2:B:255:TYR:OH   | 2.13                     | 0.94              |
| 2:B:566:ALA:HA   | 2:B:574:ASN:HB3  | 0.96                     | 0.94              |
| 3:M:60:LEU:HD22  | 3:M:62:VAL:HG23  | 0.95                     | 0.94              |
| 3:M:222:PHE:HB2  | 3:M:479:PHE:HZ   | 1.28                     | 0.94              |
| 3:M:343:ASN:CA   | 3:M:408:VAL:HG13 | 1.97                     | 0.94              |
| 4:S:131:VAL:HG21 | 4:S:153:VAL:HG22 | 1.48                     | 0.94              |
| 1:A:244:LEU:HD13 | 1:A:256:LEU:HD13 | 1.45                     | 0.94              |
| 1:A:485:PRO:O    | 1:A:488:ARG:HG3  | 1.67                     | 0.94              |
| 1:A:555:LEU:CD1  | 1:A:581:LEU:HD11 | 1.98                     | 0.94              |
| 2:B:219:TYR:O    | 2:B:223:LEU:CG   | 2.15                     | 0.94              |
| 4:S:17:VAL:CG2   | 4:S:19:PHE:CE2   | 2.51                     | 0.94              |
| 4:S:83:LEU:HD11  | 4:S:116:VAL:HG11 | 1.47                     | 0.94              |
| 1:A:107:TYR:CZ   | 1:A:128:LEU:HD23 | 2.02                     | 0.94              |
| 2:B:24:ALA:CB    | 2:B:35:TYR:CE1   | 2.50                     | 0.94              |
| 2:B:62:ALA:C     | 2:B:66:ILE:CD1   | 2.35                     | 0.94              |

*Continued on next page...*

*Continued from previous page...*

| Atom-1           | Atom-2           | Interatomic distance (Å) | Clash overlap (Å) |
|------------------|------------------|--------------------------|-------------------|
| 2:B:171:GLY:HA2  | 2:B:207:VAL:CG1  | 1.94                     | 0.94              |
| 2:B:451:MET:SD   | 2:B:489:ILE:HG12 | 2.08                     | 0.94              |
| 2:B:476:ARG:HA   | 2:B:514:LEU:CD1  | 1.96                     | 0.94              |
| 4:S:53:THR:OG1   | 4:S:68:VAL:C     | 2.06                     | 0.94              |
| 1:A:399:ASP:O    | 1:A:420:ILE:CA   | 2.14                     | 0.94              |
| 2:B:48:VAL:HG23  | 2:B:82:TYR:CE2   | 2.02                     | 0.94              |
| 2:B:123:LEU:HD12 | 2:B:142:LEU:HD21 | 1.48                     | 0.94              |
| 2:B:123:LEU:O    | 2:B:127:LEU:CG   | 2.15                     | 0.94              |
| 2:B:267:ASP:HB3  | 2:B:289:PRO:CD   | 1.98                     | 0.94              |
| 2:B:523:PHE:CZ   | 2:B:580:TYR:CE2  | 2.44                     | 0.94              |
| 3:M:215:TYR:CB   | 3:M:467:TYR:HD2  | 1.80                     | 0.94              |
| 3:M:443:SER:HB3  | 3:M:447:ILE:HG12 | 1.47                     | 0.94              |
| 1:A:101:GLN:NE2  | 4:S:167:ILE:HG22 | 1.83                     | 0.94              |
| 1:A:150:LEU:HB3  | 1:A:162:ILE:CD1  | 1.97                     | 0.94              |
| 1:A:212:ILE:CG1  | 4:S:145:ASN:ND2  | 2.31                     | 0.94              |
| 1:A:316:LEU:HD13 | 1:A:348:PHE:CD2  | 1.99                     | 0.94              |
| 1:A:557:LYS:CE   | 2:B:606:ASP:N    | 1.85                     | 0.94              |
| 2:B:117:LEU:HD23 | 2:B:150:LEU:HD23 | 1.45                     | 0.94              |
| 2:B:135:ARG:HB3  | 2:B:161:LEU:HG   | 1.48                     | 0.94              |
| 2:B:162:VAL:HG21 | 2:B:195:ILE:C    | 1.88                     | 0.94              |
| 2:B:239:GLN:OE1  | 3:M:278:ILE:HG23 | 1.66                     | 0.94              |
| 2:B:303:LEU:HD11 | 2:B:333:GLN:CD   | 1.88                     | 0.94              |
| 2:B:374:PHE:HE1  | 2:B:381:PHE:CE1  | 1.86                     | 0.94              |
| 3:M:218:LEU:CA   | 3:M:472:TYR:CE2  | 2.50                     | 0.94              |
| 3:M:432:THR:HG1  | 3:M:480:GLN:HG3  | 1.14                     | 0.94              |
| 4:S:8:PHE:CE1    | 4:S:84:TYR:CG    | 2.56                     | 0.94              |
| 1:A:509:PRO:HB3  | 1:A:547:VAL:HG23 | 1.50                     | 0.94              |
| 2:B:215:TYR:HD2  | 2:B:219:TYR:HE1  | 1.04                     | 0.94              |
| 2:B:363:ILE:HG22 | 2:B:398:ILE:HG12 | 1.48                     | 0.94              |
| 3:M:302:TYR:CE2  | 3:M:445:SER:CB   | 2.51                     | 0.94              |
| 1:A:557:LYS:CE   | 2:B:606:ASP:CB   | 2.45                     | 0.94              |
| 2:B:103:LEU:HD13 | 3:M:132:GLY:HA3  | 1.50                     | 0.94              |
| 2:B:556:LEU:HD23 | 2:B:588:ILE:HG13 | 1.49                     | 0.94              |
| 3:M:272:LEU:HD22 | 3:M:278:ILE:CB   | 1.98                     | 0.94              |
| 3:M:364:VAL:O    | 3:M:367:ALA:O    | 1.85                     | 0.94              |
| 1:A:332:TYR:CE1  | 1:A:366:SER:OG   | 2.12                     | 0.93              |
| 2:B:162:VAL:CG2  | 2:B:199:LEU:HD11 | 1.97                     | 0.93              |
| 2:B:352:ASN:CB   | 3:M:49:ASP:CG    | 2.35                     | 0.93              |
| 2:B:353:GLN:CD   | 3:M:47:SER:HB3   | 1.83                     | 0.93              |
| 2:B:490:ILE:HG13 | 2:B:518:ILE:HG21 | 1.51                     | 0.93              |
| 2:B:546:CYS:CA   | 2:B:607:ILE:CG2  | 2.39                     | 0.93              |

*Continued on next page...*

*Continued from previous page...*

| Atom-1           | Atom-2           | Interatomic distance (Å) | Clash overlap (Å) |
|------------------|------------------|--------------------------|-------------------|
| 2:B:582:ASP:O    | 2:B:584:SER:CB   | 2.16                     | 0.93              |
| 3:M:319:SER:HG   | 3:M:346:ASN:HB2  | 1.19                     | 0.93              |
| 1:A:244:LEU:HD23 | 1:A:277:LYS:O    | 1.66                     | 0.93              |
| 3:M:222:PHE:O    | 3:M:479:PHE:CZ   | 2.20                     | 0.93              |
| 3:M:443:SER:HG   | 3:M:447:ILE:C    | 1.67                     | 0.93              |
| 2:B:117:LEU:HD21 | 2:B:149:SER:CB   | 1.99                     | 0.93              |
| 2:B:223:LEU:HD22 | 2:B:255:TYR:CD1  | 2.01                     | 0.93              |
| 2:B:256:CYS:HA   | 2:B:293:VAL:HG21 | 1.47                     | 0.93              |
| 2:B:396:ILE:HD11 | 2:B:418:TYR:CZ   | 2.04                     | 0.93              |
| 2:B:553:ALA:HB1  | 2:B:614:ILE:HG12 | 1.48                     | 0.93              |
| 2:B:563:PHE:CD2  | 2:B:584:SER:HB2  | 1.95                     | 0.93              |
| 3:M:100:LEU:HD22 | 3:M:101:LEU:N    | 1.81                     | 0.93              |
| 1:A:178:ARG:NH1  | 1:A:209:ASP:HB3  | 1.83                     | 0.93              |
| 1:A:182:ILE:C    | 1:A:221:VAL:HG21 | 1.89                     | 0.93              |
| 1:A:207:LEU:HD23 | 1:A:239:LEU:CB   | 1.97                     | 0.93              |
| 2:B:29:LYS:HE2   | 2:B:30:LEU:H     | 0.87                     | 0.93              |
| 2:B:106:LEU:HD13 | 2:B:144:ASP:HB2  | 0.95                     | 0.93              |
| 2:B:216:LYS:HG3  | 2:B:251:LEU:CD1  | 1.99                     | 0.93              |
| 3:M:215:TYR:HB2  | 3:M:467:TYR:CD2  | 2.02                     | 0.93              |
| 3:M:219:LEU:HB3  | 3:M:472:TYR:C    | 1.87                     | 0.93              |
| 3:M:290:PHE:CZ   | 3:M:297:PHE:CD2  | 2.57                     | 0.93              |
| 1:A:71:VAL:HG12  | 1:A:105:VAL:HG12 | 1.47                     | 0.93              |
| 1:A:282:MET:O    | 1:A:283:GLU:C    | 2.01                     | 0.93              |
| 2:B:51:LEU:CD2   | 2:B:59:VAL:HG13  | 1.98                     | 0.93              |
| 2:B:159:LYS:HD2  | 2:B:191:GLU:HG3  | 1.49                     | 0.93              |
| 2:B:552:SER:O    | 2:B:556:LEU:HG   | 1.68                     | 0.93              |
| 3:M:244:VAL:CA   | 3:M:472:TYR:CE2  | 2.43                     | 0.93              |
| 1:A:180:LYS:HE3  | 4:S:156:LEU:HD21 | 1.51                     | 0.93              |
| 2:B:158:VAL:HG13 | 2:B:173:VAL:CG1  | 1.98                     | 0.93              |
| 2:B:267:ASP:C    | 2:B:276:SER:CB   | 2.36                     | 0.93              |
| 3:M:2:TYR:O      | 3:M:81:SER:CB    | 2.16                     | 0.93              |
| 3:M:224:VAL:N    | 3:M:479:PHE:CA   | 2.31                     | 0.93              |
| 3:M:317:MET:HB3  | 3:M:320:ILE:C    | 1.87                     | 0.93              |
| 3:M:327:PHE:HE1  | 3:M:336:ASP:CB   | 1.81                     | 0.93              |
| 4:S:63:ASN:O     | 4:S:66:ASP:OD1   | 1.85                     | 0.93              |
| 1:A:213:SER:OG   | 4:S:143:GLU:OE1  | 1.86                     | 0.93              |
| 2:B:24:ALA:HB3   | 2:B:35:TYR:CD2   | 2.04                     | 0.93              |
| 2:B:123:LEU:HD22 | 2:B:138:ALA:O    | 1.67                     | 0.93              |
| 2:B:311:TYR:HE2  | 2:B:342:ALA:HB2  | 0.80                     | 0.93              |
| 2:B:549:LEU:CG   | 2:B:611:ALA:HA   | 1.98                     | 0.93              |
| 3:M:104:PHE:CZ   | 3:M:113:LYS:NZ   | 0.73                     | 0.93              |

*Continued on next page...*

*Continued from previous page...*

| Atom-1           | Atom-2           | Interatomic distance (Å) | Clash overlap (Å) |
|------------------|------------------|--------------------------|-------------------|
| 1:A:102:GLN:HB3  | 4:S:166:LYS:HB2  | 0.96                     | 0.93              |
| 1:A:103:LYS:CG   | 4:S:163:THR:HG21 | 1.98                     | 0.93              |
| 1:A:401:VAL:HB   | 1:A:419:ILE:HD12 | 1.49                     | 0.93              |
| 2:B:24:ALA:HB1   | 2:B:35:TYR:CE1   | 2.03                     | 0.93              |
| 2:B:275:ARG:HG3  | 2:B:294:VAL:CG1  | 1.85                     | 0.93              |
| 3:M:69:ILE:HD11  | 3:M:90:PHE:HZ    | 0.77                     | 0.93              |
| 4:S:4:ALA:HA     | 4:S:18:LYS:O     | 1.69                     | 0.93              |
| 1:A:606:PHE:HZ   | 2:B:550:VAL:HG11 | 1.34                     | 0.93              |
| 1:A:629:LEU:HD11 | 2:B:610:ARG:HH11 | 1.28                     | 0.93              |
| 2:B:132:SER:CA   | 2:B:169:VAL:CG2  | 2.47                     | 0.93              |
| 2:B:252:LEU:HD12 | 2:B:302:PHE:HE1  | 1.34                     | 0.93              |
| 2:B:549:LEU:HG   | 2:B:614:ILE:HD12 | 1.50                     | 0.93              |
| 1:A:132:LEU:CD1  | 1:A:165:ASP:HB3  | 1.99                     | 0.93              |
| 1:A:316:LEU:CD1  | 1:A:348:PHE:CE2  | 2.52                     | 0.93              |
| 1:A:332:TYR:CZ   | 1:A:336:ILE:HD11 | 2.03                     | 0.93              |
| 1:A:523:SER:CB   | 1:A:562:TRP:HE1  | 1.82                     | 0.93              |
| 2:B:67:ILE:CD1   | 2:B:103:LEU:HB2  | 1.99                     | 0.93              |
| 2:B:219:TYR:O    | 2:B:223:LEU:HD21 | 1.66                     | 0.93              |
| 2:B:553:ALA:HA   | 2:B:614:ILE:CG2  | 1.99                     | 0.93              |
| 2:B:559:ASP:O    | 2:B:562:ASN:C    | 2.08                     | 0.93              |
| 1:A:189:PHE:HD2  | 1:A:225:LEU:CD2  | 1.81                     | 0.92              |
| 1:A:605:GLU:OE2  | 1:A:632:PHE:CZ   | 2.22                     | 0.92              |
| 1:A:633:PHE:HD1  | 2:B:513:TRP:CZ3  | 1.76                     | 0.92              |
| 2:B:106:LEU:HD11 | 2:B:144:ASP:O    | 1.56                     | 0.92              |
| 2:B:197:LYS:CB   | 2:B:229:HIS:NE2  | 2.32                     | 0.92              |
| 4:S:87:PHE:CD1   | 4:S:102:ILE:HG12 | 2.04                     | 0.92              |
| 1:A:99:LYS:NZ    | 4:S:164:ASP:CB   | 2.32                     | 0.92              |
| 1:A:563:CYS:HA   | 1:A:566:PHE:CD2  | 2.03                     | 0.92              |
| 2:B:197:LYS:N    | 2:B:229:HIS:CE1  | 2.37                     | 0.92              |
| 2:B:277:CYS:CA   | 2:B:292:GLU:HG3  | 1.99                     | 0.92              |
| 2:B:396:ILE:CD1  | 2:B:418:TYR:CE2  | 2.52                     | 0.92              |
| 2:B:497:LEU:CD2  | 2:B:533:LEU:HD21 | 1.97                     | 0.92              |
| 3:M:4:SER:O      | 3:M:78:ALA:HB1   | 1.17                     | 0.92              |
| 3:M:69:ILE:HG13  | 3:M:90:PHE:HE1   | 1.32                     | 0.92              |
| 4:S:54:PRO:C     | 4:S:57:LEU:HD13  | 1.90                     | 0.92              |
| 1:A:104:ARG:HA   | 1:A:145:ILE:CG2  | 1.97                     | 0.92              |
| 1:A:138:ASN:OD1  | 4:S:158:LYS:CD   | 2.13                     | 0.92              |
| 1:A:141:VAL:CG1  | 4:S:159:ALA:CB   | 2.35                     | 0.92              |
| 1:A:264:SER:HB3  | 1:A:271:ARG:CG   | 1.99                     | 0.92              |
| 1:A:319:LEU:O    | 1:A:320:HIS:C    | 1.98                     | 0.92              |
| 1:A:557:LYS:CB   | 2:B:605:PHE:HD2  | 1.80                     | 0.92              |

*Continued on next page...*

*Continued from previous page...*

| Atom-1           | Atom-2           | Interatomic distance (Å) | Clash overlap (Å) |
|------------------|------------------|--------------------------|-------------------|
| 1:A:609:LEU:HD21 | 1:A:628:VAL:HG21 | 0.92                     | 0.92              |
| 2:B:20:ARG:HG3   | 2:B:21:GLU:H     | 1.31                     | 0.92              |
| 2:B:182:ARG:CD   | 2:B:217:GLU:HB3  | 2.00                     | 0.92              |
| 2:B:286:ILE:CG2  | 2:B:288:TYR:CZ   | 2.52                     | 0.92              |
| 2:B:566:ALA:C    | 2:B:574:ASN:HB2  | 1.78                     | 0.92              |
| 3:M:52:ASP:HA    | 3:M:67:SER:C     | 1.90                     | 0.92              |
| 3:M:435:LEU:O    | 3:M:479:PHE:CG   | 2.22                     | 0.92              |
| 2:B:195:ILE:O    | 2:B:197:LYS:N    | 2.02                     | 0.92              |
| 2:B:478:LEU:O    | 2:B:479:VAL:C    | 2.00                     | 0.92              |
| 3:M:81:SER:O     | 3:M:82:LYS:HB3   | 1.69                     | 0.92              |
| 4:S:15:ARG:HD2   | 4:S:122:ILE:CG1  | 2.00                     | 0.92              |
| 1:A:216:SER:CB   | 4:S:143:GLU:HA   | 1.99                     | 0.92              |
| 1:A:609:LEU:HD23 | 1:A:628:VAL:HG11 | 1.51                     | 0.92              |
| 2:B:176:ALA:O    | 2:B:178:ILE:N    | 2.02                     | 0.92              |
| 3:M:215:TYR:CE1  | 3:M:468:LYS:HG2  | 2.04                     | 0.92              |
| 3:M:224:VAL:N    | 3:M:479:PHE:CB   | 2.31                     | 0.92              |
| 1:A:253:ILE:CD1  | 1:A:281:LEU:HB3  | 1.99                     | 0.92              |
| 1:A:516:ILE:HG21 | 1:A:554:ALA:HB3  | 1.51                     | 0.92              |
| 2:B:174:ALA:HB1  | 2:B:211:ALA:CA   | 2.00                     | 0.92              |
| 2:B:351:GLU:N    | 2:B:351:GLU:OE2  | 2.01                     | 0.92              |
| 3:M:66:PHE:CA    | 3:M:77:LEU:CD1   | 2.41                     | 0.92              |
| 3:M:245:ASP:O    | 3:M:472:TYR:HE1  | 1.39                     | 0.92              |
| 4:S:48:SER:CB    | 4:S:77:TYR:HB3   | 1.99                     | 0.92              |
| 1:A:244:LEU:HD13 | 1:A:256:LEU:HD12 | 1.51                     | 0.92              |
| 2:B:62:ALA:O     | 2:B:66:ILE:HD12  | 1.66                     | 0.92              |
| 2:B:132:SER:CA   | 2:B:169:VAL:HG21 | 1.99                     | 0.92              |
| 3:M:281:GLY:C    | 3:M:282:VAL:HG23 | 1.90                     | 0.92              |
| 4:S:53:THR:HG23  | 4:S:67:GLU:O     | 1.67                     | 0.92              |
| 2:B:102:HIS:O    | 2:B:103:LEU:C    | 1.98                     | 0.92              |
| 2:B:144:ASP:CA   | 2:B:179:LYS:NZ   | 2.27                     | 0.92              |
| 2:B:174:ALA:O    | 2:B:175:LEU:C    | 1.99                     | 0.92              |
| 2:B:219:TYR:CE2  | 2:B:226:LEU:CB   | 2.44                     | 0.92              |
| 2:B:278:PRO:HA   | 2:B:288:TYR:O    | 1.63                     | 0.92              |
| 3:M:4:SER:OG     | 3:M:6:TYR:CE1    | 2.23                     | 0.92              |
| 3:M:256:VAL:CG1  | 3:M:290:PHE:HB3  | 1.99                     | 0.92              |
| 3:M:347:PHE:CE1  | 3:M:439:TYR:CD2  | 2.58                     | 0.92              |
| 4:S:5:VAL:O      | 4:S:17:VAL:HA    | 1.68                     | 0.92              |
| 4:S:7:ILE:HG21   | 4:S:121:LEU:CD2  | 2.00                     | 0.92              |
| 1:A:103:LYS:HB3  | 1:A:107:TYR:CE1  | 2.04                     | 0.92              |
| 1:A:105:VAL:CG2  | 4:S:167:ILE:CG2  | 2.46                     | 0.92              |
| 1:A:170:LEU:HD12 | 1:A:206:LYS:HG3  | 1.48                     | 0.92              |

*Continued on next page...*

*Continued from previous page...*

| Atom-1           | Atom-2           | Interatomic distance (Å) | Clash overlap (Å) |
|------------------|------------------|--------------------------|-------------------|
| 2:B:292:GLU:HG2  | 2:B:296:ASP:HB2  | 1.52                     | 0.92              |
| 2:B:578:PRO:CB   | 2:B:579:PRO:CD   | 2.48                     | 0.92              |
| 3:M:245:ASP:CB   | 3:M:472:TYR:CD1  | 2.52                     | 0.92              |
| 1:A:64:LEU:HG    | 1:A:102:GLN:HE22 | 1.35                     | 0.92              |
| 1:A:144:GLY:HA2  | 1:A:180:LYS:CB   | 2.00                     | 0.92              |
| 2:B:158:VAL:C    | 2:B:195:ILE:HD13 | 1.90                     | 0.92              |
| 2:B:483:PRO:HB3  | 2:B:521:ILE:HG21 | 0.95                     | 0.92              |
| 2:B:578:PRO:HB2  | 2:B:579:PRO:HD2  | 1.49                     | 0.92              |
| 3:M:254:PRO:HB3  | 3:M:454:ILE:HD11 | 1.51                     | 0.92              |
| 4:S:8:PHE:HB3    | 4:S:36:TYR:OH    | 1.69                     | 0.92              |
| 4:S:130:SER:CB   | 4:S:156:LEU:HD13 | 1.99                     | 0.92              |
| 1:A:189:PHE:HD2  | 1:A:225:LEU:HD21 | 1.29                     | 0.91              |
| 2:B:151:ALA:HA   | 2:B:180:LEU:CG   | 2.00                     | 0.91              |
| 2:B:181:TYR:HE2  | 2:B:222:HIS:N    | 1.64                     | 0.91              |
| 2:B:193:LEU:C    | 2:B:195:ILE:N    | 2.20                     | 0.91              |
| 2:B:215:TYR:HD2  | 2:B:219:TYR:CE1  | 1.87                     | 0.91              |
| 2:B:230:PHE:HZ   | 2:B:252:LEU:HD22 | 0.87                     | 0.91              |
| 4:S:21:THR:HB    | 4:S:22:PRO:HD2   | 1.50                     | 0.91              |
| 2:B:412:PHE:HE2  | 2:B:446:TRP:HB3  | 1.32                     | 0.91              |
| 3:M:433:VAL:CG1  | 3:M:481:VAL:HB   | 2.00                     | 0.91              |
| 1:A:186:PHE:CE1  | 1:A:224:GLU:CB   | 2.53                     | 0.91              |
| 1:A:291:ILE:HG23 | 1:A:318:ARG:HB3  | 0.93                     | 0.91              |
| 2:B:93:ASN:HA    | 2:B:134:LEU:HD11 | 1.51                     | 0.91              |
| 2:B:162:VAL:HG23 | 2:B:195:ILE:HG23 | 1.09                     | 0.91              |
| 2:B:170:ARG:HA   | 2:B:199:LEU:HD22 | 0.92                     | 0.91              |
| 2:B:340:ILE:CG1  | 2:B:373:LEU:HD23 | 2.01                     | 0.91              |
| 4:S:109:LEU:HD13 | 4:S:113:PHE:CE1  | 2.03                     | 0.91              |
| 1:A:147:LEU:CD2  | 1:A:166:LEU:HD21 | 1.92                     | 0.91              |
| 1:A:633:PHE:CD2  | 2:B:550:VAL:HG12 | 2.02                     | 0.91              |
| 2:B:116:THR:CG2  | 2:B:150:LEU:CD1  | 2.48                     | 0.91              |
| 2:B:154:ILE:CD1  | 2:B:180:LEU:HD13 | 2.00                     | 0.91              |
| 2:B:252:LEU:HB3  | 2:B:302:PHE:CD2  | 2.05                     | 0.91              |
| 2:B:274:PRO:CG   | 2:B:295:ASN:ND2  | 2.33                     | 0.91              |
| 2:B:319:LEU:HD11 | 2:B:358:MET:SD   | 2.10                     | 0.91              |
| 3:M:256:VAL:O    | 3:M:289:THR:HA   | 1.69                     | 0.91              |
| 1:A:179:LYS:HE3  | 4:S:143:GLU:HB2  | 0.94                     | 0.91              |
| 1:A:629:LEU:CD2  | 2:B:610:ARG:HH11 | 1.82                     | 0.91              |
| 1:A:637:GLU:HG3  | 2:B:516:GLY:N    | 1.84                     | 0.91              |
| 2:B:286:ILE:HG23 | 2:B:288:TYR:CZ   | 2.06                     | 0.91              |
| 3:M:19:LEU:HD13  | 3:M:24:ALA:HB3   | 1.51                     | 0.91              |
| 4:S:16:LEU:HD23  | 4:S:128:LEU:HD23 | 1.50                     | 0.91              |

*Continued on next page...*

*Continued from previous page...*

| Atom-1           | Atom-2           | Interatomic distance (Å) | Clash overlap (Å) |
|------------------|------------------|--------------------------|-------------------|
| 1:A:103:LYS:HD3  | 1:A:131:ASP:CG   | 1.91                     | 0.91              |
| 2:B:87:VAL:HG11  | 2:B:122:SER:HB3  | 1.48                     | 0.91              |
| 2:B:237:ILE:HG21 | 2:B:305:SER:HB3  | 1.50                     | 0.91              |
| 2:B:319:LEU:HD13 | 2:B:354:GLY:O    | 1.69                     | 0.91              |
| 2:B:518:ILE:O    | 2:B:518:ILE:HD12 | 1.70                     | 0.91              |
| 3:M:2:TYR:N      | 3:M:81:SER:OG    | 2.04                     | 0.91              |
| 1:A:99:LYS:HZ3   | 4:S:164:ASP:HB2  | 1.28                     | 0.91              |
| 1:A:143:VAL:O    | 1:A:147:LEU:HG   | 1.71                     | 0.91              |
| 1:A:147:LEU:HD13 | 1:A:181:ALA:HA   | 1.49                     | 0.91              |
| 2:B:307:ASN:HD21 | 2:B:336:ASN:HD22 | 1.13                     | 0.91              |
| 2:B:549:LEU:CG   | 2:B:611:ALA:CA   | 2.49                     | 0.91              |
| 3:M:101:LEU:HG   | 3:M:106:LYS:C    | 1.89                     | 0.91              |
| 3:M:362:PHE:O    | 3:M:363:ASN:C    | 2.07                     | 0.91              |
| 1:A:102:GLN:CB   | 4:S:163:THR:CB   | 2.27                     | 0.91              |
| 2:B:143:SER:CB   | 2:B:179:LYS:HD2  | 2.01                     | 0.91              |
| 2:B:219:TYR:CE2  | 2:B:226:LEU:N    | 2.28                     | 0.91              |
| 3:M:45:SER:CA    | 3:M:47:SER:H     | 1.83                     | 0.91              |
| 1:A:220:SER:HB3  | 4:S:142:ILE:HG23 | 1.51                     | 0.91              |
| 1:A:250:ASN:OD1  | 1:A:285:THR:HG21 | 1.69                     | 0.91              |
| 1:A:403:LEU:CD2  | 1:A:422:GLU:CD   | 2.38                     | 0.91              |
| 1:A:573:GLU:O    | 1:A:574:ILE:C    | 1.97                     | 0.91              |
| 1:A:631:SER:CA   | 2:B:557:SER:HB2  | 1.98                     | 0.91              |
| 2:B:351:GLU:O    | 3:M:48:ASP:HB2   | 1.70                     | 0.91              |
| 2:B:486:HIS:CD2  | 2:B:518:ILE:HG12 | 2.06                     | 0.91              |
| 2:B:596:LEU:HD22 | 2:B:615:SER:CB   | 2.00                     | 0.91              |
| 3:M:245:ASP:C    | 3:M:472:TYR:CE1  | 2.44                     | 0.91              |
| 3:M:262:THR:HG22 | 3:M:264:GLY:N    | 1.86                     | 0.91              |
| 4:S:53:THR:O     | 4:S:69:ASN:ND2   | 2.04                     | 0.91              |
| 4:S:53:THR:N     | 4:S:69:ASN:HB2   | 1.85                     | 0.91              |
| 1:A:100:LEU:O    | 4:S:160:ALA:HA   | 1.30                     | 0.91              |
| 1:A:101:GLN:CG   | 4:S:160:ALA:CB   | 2.17                     | 0.91              |
| 1:A:102:GLN:HA   | 4:S:167:ILE:HG12 | 0.92                     | 0.91              |
| 1:A:148:SER:O    | 1:A:151:SER:OG   | 1.87                     | 0.91              |
| 2:B:70:MET:HE3   | 2:B:107:ARG:CG   | 2.01                     | 0.91              |
| 3:M:344:ILE:HB   | 3:M:407:THR:O    | 1.70                     | 0.91              |
| 4:S:16:LEU:HD12  | 4:S:17:VAL:H     | 1.35                     | 0.91              |
| 1:A:65:ASN:C     | 4:S:165:SER:HB2  | 1.91                     | 0.90              |
| 1:A:80:TYR:CB    | 1:A:82:PHE:CE2   | 2.54                     | 0.90              |
| 1:A:623:MET:O    | 2:B:617:LEU:HD21 | 1.71                     | 0.90              |
| 2:B:588:ILE:HG23 | 2:B:618:PHE:HZ   | 1.31                     | 0.90              |
| 3:M:45:SER:HA    | 3:M:47:SER:H     | 1.36                     | 0.90              |

*Continued on next page...*

*Continued from previous page...*

| Atom-1           | Atom-2           | Interatomic distance (Å) | Clash overlap (Å) |
|------------------|------------------|--------------------------|-------------------|
| 3:M:65:TYR:CD1   | 3:M:86:PRO:HB3   | 2.05                     | 0.90              |
| 1:A:92:LEU:HD13  | 1:A:123:LEU:HD12 | 1.50                     | 0.90              |
| 1:A:179:LYS:CD   | 4:S:143:GLU:HB2  | 1.99                     | 0.90              |
| 1:A:381:GLU:O    | 1:A:382:ASP:C    | 1.97                     | 0.90              |
| 2:B:346:THR:HG22 | 2:B:350:THR:CG2  | 2.00                     | 0.90              |
| 3:M:92:PHE:HZ    | 3:M:129:VAL:CG2  | 1.84                     | 0.90              |
| 1:A:105:VAL:HG21 | 4:S:167:ILE:CA   | 2.01                     | 0.90              |
| 1:A:609:LEU:HG   | 1:A:628:VAL:HB   | 0.90                     | 0.90              |
| 1:A:638:LEU:CD1  | 2:B:518:ILE:HG23 | 2.00                     | 0.90              |
| 2:B:20:ARG:NH1   | 2:B:35:TYR:OH    | 2.03                     | 0.90              |
| 2:B:29:LYS:CD    | 2:B:30:LEU:H     | 1.83                     | 0.90              |
| 2:B:441:GLN:HG2  | 2:B:481:LYS:HG3  | 1.53                     | 0.90              |
| 4:S:8:PHE:HE1    | 4:S:84:TYR:CG    | 1.89                     | 0.90              |
| 1:A:634:ASN:O    | 2:B:517:GLU:N    | 2.02                     | 0.90              |
| 2:B:353:GLN:HB2  | 3:M:49:ASP:N     | 1.84                     | 0.90              |
| 3:M:317:MET:HB2  | 3:M:322:LEU:N    | 1.84                     | 0.90              |
| 1:A:67:LYS:C     | 4:S:166:LYS:HA   | 1.91                     | 0.90              |
| 1:A:107:TYR:CZ   | 1:A:128:LEU:CD2  | 2.54                     | 0.90              |
| 1:A:326:GLN:HA   | 1:A:331:ARG:HH21 | 1.33                     | 0.90              |
| 2:B:123:LEU:HD12 | 2:B:142:LEU:HD23 | 1.50                     | 0.90              |
| 2:B:354:GLY:O    | 2:B:358:MET:HG2  | 1.71                     | 0.90              |
| 2:B:513:TRP:N    | 2:B:551:LEU:HD11 | 1.85                     | 0.90              |
| 2:B:537:PHE:CZ   | 2:B:545:ARG:CG   | 2.54                     | 0.90              |
| 3:M:375:LYS:N    | 3:M:416:GLU:O    | 2.03                     | 0.90              |
| 3:M:379:LEU:HD22 | 3:M:386:PHE:HD1  | 1.34                     | 0.90              |
| 4:S:56:SER:O     | 4:S:60:SER:OG    | 1.88                     | 0.90              |
| 1:A:102:GLN:HE21 | 4:S:165:SER:H    | 1.18                     | 0.90              |
| 1:A:224:GLU:OE1  | 4:S:138:GLY:O    | 1.90                     | 0.90              |
| 2:B:20:ARG:HH12  | 2:B:21:GLU:HG3   | 1.34                     | 0.90              |
| 2:B:83:PHE:CZ    | 2:B:119:SER:HB2  | 2.05                     | 0.90              |
| 2:B:108:PHE:CE2  | 2:B:115:LEU:HG   | 2.05                     | 0.90              |
| 3:M:223:HIS:HB3  | 3:M:478:ASN:HA   | 1.54                     | 0.90              |
| 4:S:135:ILE:HG22 | 4:S:141:VAL:HG22 | 1.51                     | 0.90              |
| 1:A:403:LEU:HD21 | 1:A:422:GLU:N    | 1.86                     | 0.90              |
| 1:A:454:ILE:HG23 | 1:A:473:ILE:HG23 | 1.51                     | 0.90              |
| 1:A:498:LEU:O    | 1:A:501:ASN:O    | 1.88                     | 0.90              |
| 2:B:63:MET:CE    | 2:B:104:TYR:HB2  | 2.02                     | 0.90              |
| 2:B:70:MET:SD    | 2:B:107:ARG:HB2  | 2.11                     | 0.90              |
| 2:B:527:PRO:HB2  | 2:B:587:ARG:HG3  | 1.52                     | 0.90              |
| 2:B:553:ALA:CB   | 2:B:614:ILE:CG1  | 2.48                     | 0.90              |
| 4:S:15:ARG:NH1   | 4:S:122:ILE:CD1  | 2.35                     | 0.90              |

*Continued on next page...*



*Continued from previous page...*

| Atom-1           | Atom-2           | Interatomic distance (Å) | Clash overlap (Å) |
|------------------|------------------|--------------------------|-------------------|
| 4:S:17:VAL:HG21  | 4:S:19:PHE:HZ    | 1.22                     | 0.90              |
| 1:A:96:SER:HA    | 1:A:127:LEU:CG   | 2.00                     | 0.90              |
| 2:B:135:ARG:HH22 | 2:B:164:ASP:CG   | 1.73                     | 0.90              |
| 2:B:278:PRO:HB3  | 2:B:288:TYR:O    | 1.69                     | 0.90              |
| 2:B:319:LEU:HD12 | 2:B:358:MET:HG3  | 0.91                     | 0.90              |
| 2:B:418:TYR:CD1  | 2:B:424:PHE:CE1  | 2.59                     | 0.90              |
| 2:B:525:ILE:C    | 2:B:527:PRO:HD2  | 1.92                     | 0.90              |
| 1:A:634:ASN:O    | 2:B:517:GLU:HA   | 1.71                     | 0.90              |
| 2:B:67:ILE:HD11  | 2:B:103:LEU:HB2  | 1.51                     | 0.90              |
| 2:B:219:TYR:CD1  | 2:B:255:TYR:CE1  | 2.49                     | 0.90              |
| 2:B:360:LEU:HD13 | 2:B:391:ALA:HA   | 1.51                     | 0.90              |
| 2:B:549:LEU:HD22 | 2:B:611:ALA:HB2  | 0.91                     | 0.90              |
| 2:B:602:ASP:O    | 2:B:608:ARG:NH2  | 2.04                     | 0.90              |
| 3:M:104:PHE:HE1  | 3:M:113:LYS:CE   | 1.42                     | 0.90              |
| 3:M:219:LEU:CB   | 3:M:472:TYR:C    | 2.39                     | 0.90              |
| 1:A:186:PHE:CD1  | 1:A:224:GLU:CB   | 2.54                     | 0.90              |
| 1:A:631:SER:HA   | 2:B:557:SER:HB2  | 1.53                     | 0.90              |
| 1:A:637:GLU:OE1  | 2:B:513:TRP:HD1  | 1.50                     | 0.90              |
| 2:B:155:LEU:HB2  | 2:B:188:TYR:CD2  | 2.07                     | 0.90              |
| 2:B:311:TYR:CE2  | 2:B:342:ALA:HB1  | 2.07                     | 0.90              |
| 2:B:319:LEU:HD13 | 2:B:358:MET:CG   | 1.72                     | 0.90              |
| 3:M:222:PHE:CD1  | 3:M:240:ILE:CG2  | 2.55                     | 0.90              |
| 3:M:379:LEU:CD2  | 3:M:386:PHE:CG   | 2.51                     | 0.90              |
| 4:S:39:ILE:CD1   | 4:S:77:TYR:CD2   | 2.54                     | 0.90              |
| 1:A:105:VAL:HG21 | 4:S:167:ILE:CG2  | 2.01                     | 0.89              |
| 2:B:20:ARG:CZ    | 2:B:21:GLU:CG    | 2.37                     | 0.89              |
| 2:B:563:PHE:CE2  | 2:B:584:SER:CA   | 2.55                     | 0.89              |
| 3:M:101:LEU:HG   | 3:M:106:LYS:CB   | 2.02                     | 0.89              |
| 3:M:265:ASN:OD1  | 3:M:313:SER:CB   | 2.18                     | 0.89              |
| 1:A:102:GLN:CB   | 4:S:163:THR:CA   | 2.48                     | 0.89              |
| 1:A:533:ILE:CG1  | 1:A:562:TRP:CH2  | 2.56                     | 0.89              |
| 1:A:531:ASP:C    | 1:A:534:LYS:O    | 2.10                     | 0.89              |
| 2:B:237:ILE:O    | 2:B:238:LYS:C    | 2.04                     | 0.89              |
| 2:B:286:ILE:HG21 | 2:B:288:TYR:OH   | 1.73                     | 0.89              |
| 3:M:101:LEU:CG   | 3:M:106:LYS:C    | 2.41                     | 0.89              |
| 3:M:215:TYR:CB   | 3:M:467:TYR:CD2  | 2.54                     | 0.89              |
| 1:A:219:VAL:CG1  | 1:A:259:LEU:CD1  | 2.51                     | 0.89              |
| 2:B:346:THR:HG22 | 2:B:350:THR:HG23 | 1.53                     | 0.89              |
| 3:M:219:LEU:HD22 | 3:M:473:LYS:CA   | 2.00                     | 0.89              |
| 1:A:99:LYS:HD3   | 4:S:164:ASP:N    | 1.86                     | 0.89              |
| 1:A:557:LYS:CE   | 2:B:606:ASP:HB2  | 2.03                     | 0.89              |

*Continued on next page...*

*Continued from previous page...*

| Atom-1           | Atom-2           | Interatomic distance (Å) | Clash overlap (Å) |
|------------------|------------------|--------------------------|-------------------|
| 1:A:605:GLU:HG3  | 1:A:632:PHE:CG   | 2.07                     | 0.89              |
| 2:B:24:ALA:HB1   | 2:B:35:TYR:CD1   | 2.07                     | 0.89              |
| 2:B:120:ILE:HD13 | 2:B:142:LEU:HD23 | 1.54                     | 0.89              |
| 2:B:275:ARG:HB2  | 2:B:294:VAL:HG13 | 0.90                     | 0.89              |
| 2:B:563:PHE:CD2  | 2:B:584:SER:CA   | 2.55                     | 0.89              |
| 3:M:224:VAL:H    | 3:M:479:PHE:CA   | 1.85                     | 0.89              |
| 3:M:246:VAL:HA   | 3:M:470:ALA:HB2  | 1.52                     | 0.89              |
| 1:A:531:ASP:O    | 1:A:534:LYS:O    | 1.90                     | 0.89              |
| 2:B:378:THR:HG23 | 2:B:379:LYS:N    | 1.86                     | 0.89              |
| 2:B:562:ASN:HB3  | 2:B:580:TYR:CB   | 2.02                     | 0.89              |
| 3:M:243:ILE:O    | 3:M:472:TYR:HB2  | 1.72                     | 0.89              |
| 3:M:338:PHE:CD2  | 3:M:415:ILE:CG1  | 2.56                     | 0.89              |
| 1:A:214:VAL:CG2  | 4:S:148:ARG:NH2  | 2.35                     | 0.89              |
| 1:A:225:LEU:CD1  | 1:A:233:PHE:HZ   | 1.72                     | 0.89              |
| 1:A:372:ILE:HG21 | 1:A:427:LYS:HE3  | 1.53                     | 0.89              |
| 1:A:586:GLU:HB2  | 1:A:604:LEU:HD11 | 1.54                     | 0.89              |
| 1:A:631:SER:HB3  | 2:B:557:SER:CB   | 1.93                     | 0.89              |
| 2:B:140:SER:HB2  | 2:B:172:GLU:OE2  | 1.71                     | 0.89              |
| 2:B:177:ILE:HD13 | 2:B:196:LEU:HG   | 1.54                     | 0.89              |
| 2:B:216:LYS:CA   | 2:B:251:LEU:HD11 | 1.86                     | 0.89              |
| 2:B:243:TRP:CZ2  | 3:M:95:THR:N     | 2.40                     | 0.89              |
| 2:B:353:GLN:HG3  | 3:M:47:SER:CA    | 2.02                     | 0.89              |
| 2:B:474:VAL:O    | 2:B:477:MET:N    | 2.06                     | 0.89              |
| 3:M:436:GLU:HA   | 3:M:479:PHE:CE2  | 2.08                     | 0.89              |
| 4:S:109:LEU:HD13 | 4:S:113:PHE:HE1  | 1.36                     | 0.89              |
| 1:A:254:ILE:HG12 | 1:A:290:VAL:HG22 | 1.52                     | 0.89              |
| 1:A:392:MET:SD   | 1:A:457:LEU:CD2  | 2.61                     | 0.89              |
| 2:B:20:ARG:CZ    | 2:B:21:GLU:CB    | 2.51                     | 0.89              |
| 2:B:226:LEU:CB   | 2:B:255:TYR:CZ   | 2.42                     | 0.89              |
| 2:B:291:TYR:CE2  | 2:B:294:VAL:CG1  | 2.55                     | 0.89              |
| 2:B:475:ILE:HG22 | 2:B:514:LEU:HD21 | 1.54                     | 0.89              |
| 3:M:479:PHE:H    | 3:M:479:PHE:HD2  | 1.17                     | 0.89              |
| 1:A:147:LEU:HB3  | 1:A:184:ALA:HB2  | 1.55                     | 0.89              |
| 1:A:288:THR:HG1  | 1:A:291:ILE:HB   | 1.38                     | 0.89              |
| 2:B:346:THR:CG2  | 2:B:350:THR:CG2  | 2.50                     | 0.89              |
| 2:B:415:LEU:HD13 | 2:B:436:LEU:CD2  | 2.02                     | 0.89              |
| 2:B:553:ALA:CB   | 2:B:614:ILE:CD1  | 2.51                     | 0.89              |
| 3:M:218:LEU:HG   | 3:M:244:VAL:HG22 | 1.54                     | 0.89              |
| 3:M:255:LEU:O    | 3:M:454:ILE:HA   | 1.71                     | 0.89              |
| 4:S:53:THR:HB    | 4:S:69:ASN:H     | 1.33                     | 0.89              |
| 1:A:128:LEU:HD12 | 1:A:150:LEU:CD2  | 1.77                     | 0.89              |

*Continued on next page...*

*Continued from previous page...*

| Atom-1           | Atom-2           | Interatomic distance (Å) | Clash overlap (Å) |
|------------------|------------------|--------------------------|-------------------|
| 1:A:147:LEU:HD13 | 1:A:166:LEU:CD2  | 2.02                     | 0.89              |
| 1:A:150:LEU:HD13 | 1:A:162:ILE:HG12 | 1.52                     | 0.89              |
| 1:A:605:GLU:CG   | 1:A:632:PHE:CG   | 2.55                     | 0.89              |
| 2:B:161:LEU:HB3  | 2:B:173:VAL:HG22 | 1.55                     | 0.89              |
| 2:B:219:TYR:C    | 2:B:223:LEU:HD21 | 1.93                     | 0.89              |
| 2:B:219:TYR:HB2  | 2:B:255:TYR:CD1  | 2.07                     | 0.89              |
| 4:S:54:PRO:HG2   | 4:S:57:LEU:HD11  | 1.55                     | 0.89              |
| 1:A:95:MET:SD    | 1:A:107:TYR:CD2  | 2.65                     | 0.88              |
| 2:B:278:PRO:CA   | 2:B:288:TYR:CB   | 2.50                     | 0.88              |
| 3:M:219:LEU:CG   | 3:M:472:TYR:O    | 2.21                     | 0.88              |
| 1:A:105:VAL:CB   | 4:S:167:ILE:CD1  | 2.33                     | 0.88              |
| 1:A:516:ILE:HG22 | 1:A:554:ALA:HB1  | 1.54                     | 0.88              |
| 1:A:630:PRO:CG   | 2:B:614:ILE:HA   | 2.02                     | 0.88              |
| 2:B:56:SER:HB2   | 2:B:92:THR:HG21  | 1.55                     | 0.88              |
| 2:B:79:VAL:HG23  | 2:B:108:PHE:CE1  | 2.06                     | 0.88              |
| 2:B:208:ILE:HD13 | 2:B:236:ILE:HG22 | 1.54                     | 0.88              |
| 2:B:275:ARG:CG   | 2:B:291:TYR:HD2  | 1.83                     | 0.88              |
| 3:M:242:GLY:CA   | 3:M:444:ALA:HB2  | 2.03                     | 0.88              |
| 1:A:101:GLN:O    | 4:S:167:ILE:HG13 | 1.73                     | 0.88              |
| 1:A:213:SER:C    | 4:S:143:GLU:OE1  | 2.12                     | 0.88              |
| 1:A:217:ALA:CB   | 4:S:143:GLU:HG3  | 2.02                     | 0.88              |
| 1:A:316:LEU:HD12 | 1:A:348:PHE:CE2  | 2.07                     | 0.88              |
| 2:B:98:LYS:HD2   | 2:B:138:ALA:HB2  | 1.55                     | 0.88              |
| 2:B:219:TYR:HB3  | 2:B:223:LEU:HD21 | 1.50                     | 0.88              |
| 2:B:274:PRO:CD   | 2:B:295:ASN:ND2  | 2.36                     | 0.88              |
| 2:B:337:THR:HG23 | 2:B:373:LEU:HD11 | 1.55                     | 0.88              |
| 2:B:550:VAL:HG22 | 2:B:610:ARG:CD   | 2.02                     | 0.88              |
| 1:A:96:SER:CA    | 1:A:127:LEU:CD2  | 2.37                     | 0.88              |
| 1:A:102:GLN:CA   | 4:S:167:ILE:CG1  | 2.49                     | 0.88              |
| 1:A:216:SER:O    | 1:A:219:VAL:HB   | 1.71                     | 0.88              |
| 1:A:320:HIS:HB2  | 1:A:352:PHE:HE2  | 1.33                     | 0.88              |
| 1:A:326:GLN:HA   | 1:A:331:ARG:CZ   | 2.02                     | 0.88              |
| 2:B:20:ARG:CZ    | 2:B:21:GLU:HB2   | 2.03                     | 0.88              |
| 2:B:227:HIS:NE2  | 2:B:292:GLU:OE2  | 2.06                     | 0.88              |
| 2:B:268:LYS:O    | 2:B:273:SER:OG   | 1.91                     | 0.88              |
| 2:B:303:LEU:HD13 | 2:B:333:GLN:CB   | 1.97                     | 0.88              |
| 3:M:283:PHE:HE2  | 3:M:289:THR:HB   | 1.37                     | 0.88              |
| 1:A:225:LEU:CB   | 1:A:233:PHE:CE1  | 2.55                     | 0.88              |
| 2:B:309:LEU:CB   | 2:B:317:VAL:HG12 | 1.99                     | 0.88              |
| 3:M:10:THR:HA    | 3:M:75:TRP:NE1   | 1.88                     | 0.88              |
| 3:M:374:TYR:HB3  | 3:M:417:TYR:HD2  | 1.38                     | 0.88              |

*Continued on next page...*

*Continued from previous page...*

| Atom-1           | Atom-2           | Interatomic distance (Å) | Clash overlap (Å) |
|------------------|------------------|--------------------------|-------------------|
| 1:A:64:LEU:HG    | 1:A:102:GLN:NE2  | 1.87                     | 0.88              |
| 1:A:103:LYS:N    | 4:S:163:THR:HG21 | 1.89                     | 0.88              |
| 1:A:141:VAL:C    | 4:S:159:ALA:CB   | 2.41                     | 0.88              |
| 1:A:513:ARG:HD2  | 1:A:550:VAL:HG21 | 0.88                     | 0.88              |
| 2:B:105:LEU:O    | 2:B:106:LEU:C    | 2.00                     | 0.88              |
| 2:B:592:TYR:OH   | 2:B:619:ASP:CG   | 2.11                     | 0.88              |
| 1:A:151:SER:HB2  | 1:A:187:LYS:HB2  | 1.55                     | 0.88              |
| 2:B:78:ASP:OD1   | 2:B:80:GLN:HB2   | 1.73                     | 0.88              |
| 2:B:116:THR:HG21 | 2:B:150:LEU:HD11 | 1.55                     | 0.88              |
| 3:M:220:GLU:HG3  | 3:M:439:TYR:HD1  | 1.36                     | 0.88              |
| 3:M:272:LEU:HD21 | 3:M:278:ILE:HB   | 1.54                     | 0.88              |
| 4:S:53:THR:CG2   | 4:S:57:LEU:HB2   | 2.04                     | 0.88              |
| 1:A:96:SER:CA    | 1:A:127:LEU:CG   | 2.52                     | 0.88              |
| 1:A:154:ILE:HG22 | 1:A:191:GLN:HG3  | 1.54                     | 0.88              |
| 1:A:264:SER:CB   | 1:A:271:ARG:HD3  | 2.03                     | 0.88              |
| 1:A:595:GLU:OE2  | 2:B:472:VAL:HB   | 1.73                     | 0.88              |
| 2:B:120:ILE:HG13 | 2:B:150:LEU:HB3  | 1.54                     | 0.88              |
| 2:B:158:VAL:CG1  | 2:B:177:ILE:HG12 | 1.84                     | 0.88              |
| 2:B:260:LEU:HD22 | 2:B:291:TYR:OH   | 0.70                     | 0.88              |
| 3:M:214:LEU:CD1  | 3:M:256:VAL:HG21 | 2.04                     | 0.88              |
| 3:M:220:GLU:HG3  | 3:M:439:TYR:CD1  | 2.08                     | 0.88              |
| 3:M:334:ASP:O    | 3:M:417:TYR:N    | 2.06                     | 0.88              |
| 1:A:67:LYS:CB    | 4:S:165:SER:OG   | 2.22                     | 0.88              |
| 1:A:100:LEU:HG   | 4:S:162:SER:H    | 1.38                     | 0.88              |
| 1:A:537:THR:HB   | 1:A:584:PHE:CD1  | 2.08                     | 0.88              |
| 2:B:162:VAL:CG2  | 2:B:199:LEU:HG   | 2.03                     | 0.88              |
| 2:B:353:GLN:CG   | 3:M:48:ASP:N     | 2.36                     | 0.88              |
| 2:B:513:TRP:H    | 2:B:551:LEU:CD1  | 1.83                     | 0.88              |
| 1:A:536:MET:O    | 1:A:537:THR:C    | 1.98                     | 0.88              |
| 2:B:178:ILE:HD13 | 2:B:218:CYS:HB3  | 1.55                     | 0.88              |
| 2:B:527:PRO:HG2  | 2:B:587:ARG:CG   | 2.02                     | 0.88              |
| 2:B:531:ARG:N    | 2:B:591:MET:SD   | 2.46                     | 0.88              |
| 3:M:226:PHE:HB2  | 3:M:481:VAL:CG2  | 2.04                     | 0.88              |
| 3:M:317:MET:HB2  | 3:M:321:GLY:C    | 1.94                     | 0.88              |
| 4:S:34:GLN:CD    | 4:S:58:LEU:HD11  | 1.95                     | 0.88              |
| 4:S:73:ILE:HG23  | 4:S:88:ILE:HG23  | 1.37                     | 0.88              |
| 2:B:360:LEU:CD1  | 2:B:391:ALA:CA   | 2.52                     | 0.87              |
| 2:B:577:ASN:O    | 2:B:578:PRO:O    | 1.93                     | 0.87              |
| 3:M:4:SER:O      | 3:M:78:ALA:CA    | 2.21                     | 0.87              |
| 4:S:17:VAL:HG21  | 4:S:19:PHE:CE2   | 2.09                     | 0.87              |
| 1:A:178:ARG:NE   | 1:A:209:ASP:OD2  | 2.07                     | 0.87              |

*Continued on next page...*

*Continued from previous page...*

| Atom-1           | Atom-2           | Interatomic distance (Å) | Clash overlap (Å) |
|------------------|------------------|--------------------------|-------------------|
| 1:A:464:ILE:O    | 1:A:465:SER:C    | 1.96                     | 0.87              |
| 2:B:215:TYR:HE2  | 2:B:229:HIS:HD1  | 1.22                     | 0.87              |
| 2:B:317:VAL:O    | 2:B:321:CYS:SG   | 2.32                     | 0.87              |
| 3:M:243:ILE:CB   | 3:M:473:LYS:O    | 2.21                     | 0.87              |
| 3:M:245:ASP:HB3  | 3:M:472:TYR:HD1  | 1.39                     | 0.87              |
| 3:M:336:ASP:OD2  | 3:M:415:ILE:HB   | 1.74                     | 0.87              |
| 4:S:130:SER:OG   | 4:S:156:LEU:HD13 | 1.70                     | 0.87              |
| 1:A:64:LEU:CA    | 1:A:102:GLN:HE22 | 1.88                     | 0.87              |
| 1:A:212:ILE:HD12 | 4:S:145:ASN:CG   | 1.95                     | 0.87              |
| 1:A:629:LEU:HD21 | 2:B:610:ARG:HH11 | 1.38                     | 0.87              |
| 2:B:127:LEU:HB3  | 2:B:157:THR:CG2  | 1.95                     | 0.87              |
| 2:B:154:ILE:HD12 | 2:B:180:LEU:CG   | 2.04                     | 0.87              |
| 2:B:247:TYR:HE2  | 3:M:91:THR:HG21  | 1.09                     | 0.87              |
| 2:B:278:PRO:C    | 2:B:288:TYR:CB   | 2.38                     | 0.87              |
| 2:B:393:ILE:HG23 | 2:B:431:MET:HG2  | 1.35                     | 0.87              |
| 2:B:451:MET:HG3  | 2:B:489:ILE:CD1  | 2.04                     | 0.87              |
| 3:M:215:TYR:N    | 3:M:467:TYR:HB3  | 1.88                     | 0.87              |
| 4:S:54:PRO:O     | 4:S:57:LEU:HD13  | 1.72                     | 0.87              |
| 1:A:140:VAL:CB   | 1:A:177:ILE:HG13 | 2.02                     | 0.87              |
| 1:A:633:PHE:HD2  | 2:B:550:VAL:C    | 1.74                     | 0.87              |
| 2:B:215:TYR:CD2  | 2:B:219:TYR:HE1  | 1.92                     | 0.87              |
| 2:B:344:VAL:CG1  | 2:B:381:PHE:CZ   | 2.58                     | 0.87              |
| 2:B:374:PHE:CE1  | 2:B:381:PHE:CE1  | 2.63                     | 0.87              |
| 3:M:215:TYR:HB3  | 3:M:467:TYR:HD2  | 1.39                     | 0.87              |
| 3:M:454:ILE:HG21 | 3:M:464:THR:HG21 | 0.88                     | 0.87              |
| 1:A:557:LYS:HB3  | 2:B:605:PHE:HD2  | 1.24                     | 0.87              |
| 2:B:121:ASN:OD1  | 2:B:153:ILE:HD13 | 1.73                     | 0.87              |
| 2:B:174:ALA:HB3  | 2:B:211:ALA:HA   | 1.56                     | 0.87              |
| 2:B:321:CYS:O    | 2:B:325:LEU:HG   | 1.73                     | 0.87              |
| 2:B:592:TYR:OH   | 2:B:619:ASP:OD1  | 1.93                     | 0.87              |
| 3:M:340:LEU:HB3  | 3:M:411:LEU:HG   | 1.54                     | 0.87              |
| 3:M:374:TYR:OH   | 3:M:394:GLN:C    | 2.13                     | 0.87              |
| 1:A:105:VAL:H    | 4:S:167:ILE:HD11 | 0.72                     | 0.87              |
| 1:A:461:CYS:SG   | 1:A:469:LEU:HD23 | 2.14                     | 0.87              |
| 2:B:20:ARG:NH1   | 2:B:21:GLU:HG2   | 1.85                     | 0.87              |
| 2:B:143:SER:HA   | 2:B:179:LYS:HB2  | 1.56                     | 0.87              |
| 2:B:178:ILE:HG21 | 2:B:214:ALA:HA   | 1.55                     | 0.87              |
| 2:B:297:PRO:O    | 2:B:301:LEU:HG   | 1.73                     | 0.87              |
| 2:B:513:TRP:CB   | 2:B:551:LEU:HD21 | 2.02                     | 0.87              |
| 3:M:3:LEU:HB2    | 3:M:20:LEU:HD12  | 1.55                     | 0.87              |
| 3:M:18:TYR:HD1   | 3:M:122:SER:HA   | 1.04                     | 0.87              |

*Continued on next page...*

*Continued from previous page...*

| Atom-1           | Atom-2           | Interatomic distance (Å) | Clash overlap (Å) |
|------------------|------------------|--------------------------|-------------------|
| 3:M:217:ASP:CG   | 3:M:470:ALA:O    | 2.13                     | 0.87              |
| 3:M:259:LYS:O    | 3:M:449:VAL:HA   | 1.73                     | 0.87              |
| 1:A:557:LYS:CB   | 2:B:605:PHE:CD2  | 2.55                     | 0.87              |
| 2:B:83:PHE:HE2   | 2:B:119:SER:CB   | 1.51                     | 0.87              |
| 2:B:214:ALA:O    | 2:B:216:LYS:N    | 2.07                     | 0.87              |
| 3:M:214:LEU:C    | 3:M:467:TYR:CB   | 2.43                     | 0.87              |
| 1:A:294:SER:O    | 1:A:298:ILE:HG12 | 1.75                     | 0.87              |
| 2:B:153:ILE:O    | 2:B:155:LEU:N    | 2.08                     | 0.87              |
| 2:B:223:LEU:CD2  | 2:B:255:TYR:CD1  | 2.56                     | 0.87              |
| 2:B:236:ILE:HG22 | 2:B:240:LEU:HD11 | 1.54                     | 0.87              |
| 2:B:408:VAL:CG1  | 2:B:412:PHE:CE2  | 2.58                     | 0.87              |
| 2:B:497:LEU:O    | 2:B:498:THR:C    | 2.03                     | 0.87              |
| 2:B:559:ASP:HA   | 2:B:562:ASN:HB2  | 1.53                     | 0.87              |
| 3:M:44:ASP:O     | 3:M:46:SER:N     | 2.07                     | 0.87              |
| 3:M:212:ASN:HB3  | 3:M:250:LEU:HD23 | 1.56                     | 0.87              |
| 3:M:219:LEU:O    | 3:M:474:THR:CG2  | 2.23                     | 0.87              |
| 3:M:306:LEU:O    | 3:M:307:SER:C    | 2.04                     | 0.87              |
| 4:S:105:PHE:CZ   | 4:S:128:LEU:HD11 | 2.10                     | 0.87              |
| 1:A:213:SER:CB   | 4:S:143:GLU:OE1  | 2.23                     | 0.87              |
| 1:A:503:ASN:OD1  | 3:M:59:ASP:OD2   | 1.93                     | 0.87              |
| 2:B:106:LEU:CD1  | 2:B:144:ASP:C    | 2.43                     | 0.87              |
| 2:B:215:TYR:CD2  | 2:B:226:LEU:CD1  | 2.58                     | 0.87              |
| 2:B:219:TYR:CB   | 2:B:226:LEU:HD22 | 2.02                     | 0.87              |
| 2:B:452:LYS:NZ   | 2:B:456:ASP:OD1  | 2.08                     | 0.87              |
| 3:M:219:LEU:CD2  | 3:M:473:LYS:HA   | 2.04                     | 0.87              |
| 4:S:83:LEU:HD11  | 4:S:116:VAL:CG2  | 2.05                     | 0.87              |
| 1:A:67:LYS:HG3   | 4:S:165:SER:HG   | 1.40                     | 0.86              |
| 1:A:125:THR:HG1  | 1:A:158:LEU:HD13 | 1.40                     | 0.86              |
| 1:A:633:PHE:CE1  | 2:B:513:TRP:HE3  | 1.39                     | 0.86              |
| 2:B:196:LEU:HB2  | 2:B:229:HIS:ND1  | 1.90                     | 0.86              |
| 2:B:208:ILE:CD1  | 2:B:236:ILE:HG23 | 1.80                     | 0.86              |
| 2:B:267:ASP:O    | 2:B:276:SER:OG   | 1.93                     | 0.86              |
| 2:B:378:THR:HG23 | 2:B:379:LYS:H    | 1.38                     | 0.86              |
| 3:M:223:HIS:HD2  | 3:M:478:ASN:HB2  | 1.40                     | 0.86              |
| 3:M:379:LEU:CD2  | 3:M:386:PHE:CB   | 2.53                     | 0.86              |
| 4:S:50:PHE:HB2   | 4:S:76:ILE:HD13  | 1.56                     | 0.86              |
| 1:A:76:TYR:HH    | 4:S:125:TRP:HZ3  | 1.20                     | 0.86              |
| 1:A:264:SER:CB   | 1:A:271:ARG:CG   | 2.54                     | 0.86              |
| 1:A:633:PHE:HD2  | 2:B:551:LEU:HA   | 1.09                     | 0.86              |
| 2:B:165:PRO:HA   | 2:B:170:ARG:HH21 | 1.38                     | 0.86              |
| 2:B:245:GLN:OE1  | 2:B:309:LEU:HD12 | 1.75                     | 0.86              |

*Continued on next page...*

*Continued from previous page...*

| Atom-1           | Atom-2           | Interatomic distance (Å) | Clash overlap (Å) |
|------------------|------------------|--------------------------|-------------------|
| 2:B:252:LEU:HD13 | 2:B:302:PHE:HD1  | 1.04                     | 0.86              |
| 2:B:267:ASP:H    | 2:B:289:PRO:CG   | 1.87                     | 0.86              |
| 1:A:64:LEU:HA    | 1:A:102:GLN:NE2  | 1.90                     | 0.86              |
| 2:B:232:ARG:O    | 2:B:236:ILE:HG13 | 1.74                     | 0.86              |
| 4:S:111:ARG:HB2  | 4:S:150:VAL:HG22 | 1.58                     | 0.86              |
| 2:B:219:TYR:CD2  | 2:B:223:LEU:HA   | 2.11                     | 0.86              |
| 2:B:243:TRP:CH2  | 3:M:91:THR:O     | 2.27                     | 0.86              |
| 2:B:353:GLN:HB2  | 3:M:50:TYR:N     | 1.87                     | 0.86              |
| 3:M:223:HIS:CG   | 3:M:478:ASN:HA   | 2.11                     | 0.86              |
| 1:A:426:ILE:HG13 | 1:A:464:ILE:CD1  | 2.04                     | 0.86              |
| 1:A:637:GLU:O    | 2:B:518:ILE:N    | 1.86                     | 0.86              |
| 2:B:161:LEU:HB3  | 2:B:173:VAL:CG2  | 2.05                     | 0.86              |
| 2:B:232:ARG:HG3  | 2:B:236:ILE:CD1  | 2.06                     | 0.86              |
| 2:B:252:LEU:CB   | 2:B:302:PHE:CZ   | 2.59                     | 0.86              |
| 2:B:275:ARG:HB3  | 2:B:291:TYR:CB   | 2.02                     | 0.86              |
| 2:B:143:SER:CA   | 2:B:179:LYS:HD2  | 2.05                     | 0.86              |
| 3:M:45:SER:HB2   | 3:M:51:LEU:CD1   | 2.05                     | 0.86              |
| 3:M:242:GLY:HA3  | 3:M:444:ALA:HB2  | 1.58                     | 0.86              |
| 1:A:76:TYR:OH    | 4:S:125:TRP:HZ3  | 1.57                     | 0.86              |
| 1:A:316:LEU:HD11 | 1:A:348:PHE:CD2  | 2.07                     | 0.86              |
| 1:A:421:PRO:HG2  | 1:A:424:TYR:CD1  | 2.11                     | 0.86              |
| 1:A:630:PRO:O    | 2:B:554:LYS:N    | 2.07                     | 0.86              |
| 2:B:232:ARG:HG3  | 2:B:236:ILE:HD11 | 1.58                     | 0.86              |
| 2:B:389:ILE:HG21 | 2:B:427:ASN:HB2  | 1.56                     | 0.86              |
| 4:S:8:PHE:CZ     | 4:S:84:TYR:HB2   | 1.96                     | 0.86              |
| 4:S:135:ILE:HG23 | 4:S:141:VAL:CG1  | 2.04                     | 0.86              |
| 1:A:141:VAL:CB   | 4:S:159:ALA:N    | 2.38                     | 0.86              |
| 2:B:178:ILE:CD1  | 2:B:215:TYR:CA   | 2.51                     | 0.86              |
| 2:B:215:TYR:CD2  | 2:B:226:LEU:HD12 | 2.10                     | 0.86              |
| 2:B:534:ILE:O    | 2:B:598:LEU:HD11 | 1.76                     | 0.86              |
| 2:B:546:CYS:HB2  | 2:B:607:ILE:HD11 | 1.55                     | 0.86              |
| 2:B:566:ALA:CA   | 2:B:574:ASN:ND2  | 2.38                     | 0.86              |
| 3:M:6:TYR:CD2    | 3:M:17:GLN:CA    | 2.47                     | 0.86              |
| 3:M:323:MET:HE1  | 3:M:342:LEU:HB3  | 1.56                     | 0.86              |
| 4:S:48:SER:CA    | 4:S:77:TYR:CB    | 2.51                     | 0.86              |
| 1:A:220:SER:HB2  | 4:S:141:VAL:O    | 1.76                     | 0.86              |
| 2:B:79:VAL:HG23  | 2:B:108:PHE:HZ   | 1.40                     | 0.86              |
| 2:B:513:TRP:CD2  | 2:B:551:LEU:HD21 | 2.11                     | 0.86              |
| 4:S:39:ILE:HD11  | 4:S:77:TYR:CG    | 2.09                     | 0.86              |
| 1:A:132:LEU:HD13 | 1:A:165:ASP:CB   | 2.05                     | 0.86              |
| 2:B:267:ASP:C    | 2:B:289:PRO:HG3  | 1.95                     | 0.86              |

*Continued on next page...*

*Continued from previous page...*

| Atom-1           | Atom-2           | Interatomic distance (Å) | Clash overlap (Å) |
|------------------|------------------|--------------------------|-------------------|
| 2:B:553:ALA:CB   | 2:B:614:ILE:HD13 | 2.02                     | 0.86              |
| 2:B:553:ALA:HA   | 2:B:614:ILE:HG21 | 1.56                     | 0.86              |
| 3:M:258:VAL:HG22 | 3:M:452:ILE:CG2  | 2.06                     | 0.86              |
| 4:S:54:PRO:CG    | 4:S:57:LEU:CD1   | 2.46                     | 0.86              |
| 1:A:103:LYS:N    | 4:S:163:THR:HB   | 1.91                     | 0.85              |
| 2:B:223:LEU:CD1  | 2:B:258:GLN:C    | 2.38                     | 0.85              |
| 3:M:18:TYR:CE1   | 3:M:122:SER:OG   | 2.29                     | 0.85              |
| 3:M:253:ASN:OD1  | 3:M:292:PRO:HG2  | 1.75                     | 0.85              |
| 3:M:290:PHE:CZ   | 3:M:297:PHE:CE1  | 2.64                     | 0.85              |
| 3:M:405:THR:HG22 | 3:M:406:GLY:H    | 1.40                     | 0.85              |
| 4:S:14:PRO:CA    | 4:S:36:TYR:OH    | 2.22                     | 0.85              |
| 2:B:2:VAL:HG11   | 2:B:6:HIS:NE2    | 1.90                     | 0.85              |
| 2:B:127:LEU:CG   | 2:B:157:THR:HG23 | 2.00                     | 0.85              |
| 2:B:151:ALA:O    | 2:B:188:TYR:CD2  | 2.29                     | 0.85              |
| 2:B:196:LEU:CB   | 2:B:229:HIS:ND1  | 2.39                     | 0.85              |
| 2:B:280:PRO:O    | 2:B:283:TYR:HB2  | 1.77                     | 0.85              |
| 3:M:2:TYR:C      | 3:M:81:SER:HB2   | 1.95                     | 0.85              |
| 3:M:323:MET:SD   | 3:M:342:LEU:CG   | 2.64                     | 0.85              |
| 4:S:135:ILE:HG23 | 4:S:141:VAL:HG13 | 1.56                     | 0.85              |
| 3:M:2:TYR:N      | 3:M:81:SER:HB2   | 1.88                     | 0.85              |
| 3:M:222:PHE:CG   | 3:M:439:TYR:HE1  | 1.94                     | 0.85              |
| 3:M:360:LEU:HD23 | 3:M:362:PHE:CE2  | 2.08                     | 0.85              |
| 1:A:147:LEU:CB   | 1:A:184:ALA:CB   | 2.54                     | 0.85              |
| 1:A:332:TYR:CE1  | 1:A:366:SER:CB   | 2.58                     | 0.85              |
| 2:B:56:SER:CB    | 2:B:92:THR:CG2   | 2.52                     | 0.85              |
| 2:B:191:GLU:C    | 2:B:193:LEU:H    | 1.78                     | 0.85              |
| 2:B:355:ASN:C    | 2:B:359:LEU:HD23 | 1.96                     | 0.85              |
| 3:M:215:TYR:HD2  | 3:M:470:ALA:N    | 1.74                     | 0.85              |
| 1:A:64:LEU:CA    | 1:A:102:GLN:NE2  | 2.39                     | 0.85              |
| 1:A:240:LEU:O    | 1:A:241:TYR:C    | 2.00                     | 0.85              |
| 1:A:252:ILE:CG1  | 4:S:145:ASN:N    | 2.36                     | 0.85              |
| 1:A:516:ILE:HD13 | 1:A:551:LEU:CA   | 2.05                     | 0.85              |
| 2:B:70:MET:CE    | 2:B:104:TYR:O    | 2.24                     | 0.85              |
| 2:B:196:LEU:CB   | 2:B:229:HIS:CE1  | 2.58                     | 0.85              |
| 2:B:316:THR:CG2  | 3:M:90:PHE:CZ    | 2.59                     | 0.85              |
| 4:S:135:ILE:O    | 4:S:141:VAL:HG22 | 1.77                     | 0.85              |
| 1:A:217:ALA:CB   | 4:S:142:ILE:HB   | 2.05                     | 0.85              |
| 2:B:374:PHE:CZ   | 2:B:381:PHE:CD1  | 2.65                     | 0.85              |
| 2:B:396:ILE:HG12 | 2:B:418:TYR:HE2  | 1.37                     | 0.85              |
| 2:B:566:ALA:N    | 2:B:574:ASN:ND2  | 2.24                     | 0.85              |
| 1:A:95:MET:C     | 1:A:127:LEU:HD21 | 1.94                     | 0.85              |

*Continued on next page...*



*Continued from previous page...*

| Atom-1           | Atom-2           | Interatomic distance (Å) | Clash overlap (Å) |
|------------------|------------------|--------------------------|-------------------|
| 1:A:381:GLU:HA   | 1:A:384:LEU:HD23 | 1.59                     | 0.85              |
| 1:A:384:LEU:CD2  | 1:A:441:TYR:HE2  | 1.81                     | 0.85              |
| 2:B:162:VAL:HB   | 2:B:195:ILE:HG23 | 1.57                     | 0.85              |
| 2:B:177:ILE:HG21 | 2:B:196:LEU:HG   | 1.56                     | 0.85              |
| 2:B:404:ASN:O    | 2:B:408:VAL:HG23 | 1.76                     | 0.85              |
| 3:M:6:TYR:O      | 3:M:77:LEU:N     | 2.10                     | 0.85              |
| 3:M:7:ILE:CA     | 3:M:75:TRP:O     | 2.24                     | 0.85              |
| 4:S:28:GLN:O     | 4:S:32:LEU:HG    | 1.75                     | 0.85              |
| 1:A:178:ARG:HH11 | 1:A:209:ASP:HB3  | 1.40                     | 0.85              |
| 1:A:196:LEU:O    | 1:A:196:LEU:HD22 | 1.75                     | 0.85              |
| 2:B:21:GLU:CA    | 2:B:24:ALA:HB3   | 2.07                     | 0.85              |
| 2:B:352:ASN:HB2  | 3:M:49:ASP:CB    | 2.06                     | 0.85              |
| 2:B:396:ILE:CG1  | 2:B:418:TYR:CE2  | 2.59                     | 0.85              |
| 2:B:519:ALA:C    | 2:B:523:PHE:HB3  | 1.96                     | 0.85              |
| 2:B:592:TYR:CD2  | 2:B:618:PHE:CE2  | 2.64                     | 0.85              |
| 3:M:258:VAL:HA   | 3:M:452:ILE:HG13 | 1.56                     | 0.85              |
| 1:A:225:LEU:CB   | 1:A:233:PHE:CZ   | 2.60                     | 0.85              |
| 1:A:288:THR:CB   | 1:A:322:PHE:CZ   | 2.59                     | 0.85              |
| 1:A:298:ILE:HD11 | 1:A:311:THR:CG2  | 2.07                     | 0.85              |
| 2:B:20:ARG:NE    | 2:B:21:GLU:CB    | 2.39                     | 0.85              |
| 3:M:121:ILE:HG22 | 3:M:125:PHE:CE1  | 2.12                     | 0.85              |
| 3:M:215:TYR:CD1  | 3:M:467:TYR:O    | 2.27                     | 0.85              |
| 3:M:226:PHE:CB   | 3:M:481:VAL:HG22 | 2.04                     | 0.85              |
| 1:A:95:MET:C     | 1:A:127:LEU:CD2  | 2.45                     | 0.85              |
| 1:A:608:ARG:NH2  | 1:A:632:PHE:HZ   | 1.74                     | 0.85              |
| 1:A:633:PHE:HB2  | 2:B:550:VAL:HG13 | 1.56                     | 0.85              |
| 2:B:143:SER:OG   | 2:B:175:LEU:HB3  | 1.75                     | 0.85              |
| 2:B:230:PHE:HZ   | 2:B:252:LEU:CD2  | 1.58                     | 0.85              |
| 2:B:562:ASN:CG   | 2:B:580:TYR:HB2  | 1.97                     | 0.85              |
| 2:B:562:ASN:CG   | 2:B:580:TYR:CB   | 2.45                     | 0.85              |
| 3:M:342:LEU:CD1  | 3:M:411:LEU:HD22 | 2.05                     | 0.85              |
| 4:S:57:LEU:HB3   | 4:S:67:GLU:O     | 1.76                     | 0.85              |
| 1:A:101:GLN:HG2  | 4:S:167:ILE:CG1  | 2.07                     | 0.84              |
| 1:A:147:LEU:CD1  | 1:A:181:ALA:CA   | 2.53                     | 0.84              |
| 1:A:482:ILE:HG12 | 1:A:517:TRP:CH2  | 2.12                     | 0.84              |
| 1:A:557:LYS:CG   | 2:B:605:PHE:HD2  | 1.90                     | 0.84              |
| 1:A:563:CYS:HB2  | 1:A:621:LEU:HD12 | 1.58                     | 0.84              |
| 1:A:606:PHE:HZ   | 2:B:550:VAL:CG1  | 1.90                     | 0.84              |
| 1:A:636:TYR:CB   | 2:B:554:LYS:HZ2  | 1.89                     | 0.84              |
| 2:B:268:LYS:HA   | 2:B:276:SER:HB2  | 1.58                     | 0.84              |
| 1:A:251:TRP:CD2  | 4:S:104:THR:OG1  | 2.30                     | 0.84              |

*Continued on next page...*

*Continued from previous page...*

| Atom-1           | Atom-2           | Interatomic distance (Å) | Clash overlap (Å) |
|------------------|------------------|--------------------------|-------------------|
| 1:A:636:TYR:CB   | 2:B:554:LYS:NZ   | 2.39                     | 0.84              |
| 2:B:82:TYR:O     | 2:B:83:PHE:C     | 2.06                     | 0.84              |
| 2:B:260:LEU:HA   | 2:B:291:TYR:CE1  | 2.11                     | 0.84              |
| 1:A:88:ASN:CB    | 1:A:120:ILE:CD1  | 2.51                     | 0.84              |
| 1:A:132:LEU:O    | 1:A:169:MET:HE3  | 1.77                     | 0.84              |
| 1:A:638:LEU:CB   | 2:B:516:GLY:O    | 2.23                     | 0.84              |
| 2:B:380:LYS:HZ3  | 3:M:236:LEU:HG   | 1.36                     | 0.84              |
| 3:M:6:TYR:HA     | 3:M:16:PHE:O     | 1.77                     | 0.84              |
| 1:A:260:PHE:CZ   | 1:A:274:LEU:CD1  | 2.59                     | 0.84              |
| 1:A:266:VAL:O    | 1:A:267:GLU:CB   | 2.25                     | 0.84              |
| 1:A:557:LYS:O    | 2:B:605:PHE:HE2  | 1.57                     | 0.84              |
| 2:B:223:LEU:HD12 | 2:B:259:TYR:HA   | 0.87                     | 0.84              |
| 2:B:549:LEU:CG   | 2:B:611:ALA:CB   | 2.54                     | 0.84              |
| 3:M:224:VAL:HG23 | 3:M:479:PHE:CE1  | 2.13                     | 0.84              |
| 3:M:290:PHE:CE2  | 3:M:297:PHE:CZ   | 2.64                     | 0.84              |
| 3:M:347:PHE:CD2  | 3:M:350:VAL:HB   | 2.13                     | 0.84              |
| 4:S:48:SER:CB    | 4:S:77:TYR:CA    | 2.56                     | 0.84              |
| 1:A:103:LYS:HG3  | 4:S:163:THR:HG21 | 1.55                     | 0.84              |
| 1:A:401:VAL:HG23 | 1:A:418:ILE:O    | 1.76                     | 0.84              |
| 1:A:408:ILE:CG2  | 4:S:64:ASN:HB2   | 1.82                     | 0.84              |
| 2:B:162:VAL:O    | 2:B:164:ASP:N    | 2.10                     | 0.84              |
| 2:B:245:GLN:OE1  | 2:B:309:LEU:CD1  | 2.24                     | 0.84              |
| 2:B:418:TYR:C    | 2:B:418:TYR:HD1  | 1.77                     | 0.84              |
| 2:B:569:THR:C    | 2:B:571:SER:H    | 1.76                     | 0.84              |
| 1:A:96:SER:HB3   | 1:A:127:LEU:CD2  | 2.07                     | 0.84              |
| 1:A:504:ILE:O    | 1:A:505:ASN:C    | 2.06                     | 0.84              |
| 1:A:589:SER:HB2  | 1:A:601:VAL:CG2  | 2.08                     | 0.84              |
| 2:B:42:ILE:CG1   | 2:B:65:ARG:HD3   | 2.06                     | 0.84              |
| 3:M:323:MET:HB3  | 3:M:340:LEU:CD1  | 2.06                     | 0.84              |
| 4:S:83:LEU:CD1   | 4:S:116:VAL:HG21 | 2.07                     | 0.84              |
| 1:A:103:LYS:HB2  | 4:S:163:THR:HG21 | 1.57                     | 0.84              |
| 1:A:125:THR:OG1  | 1:A:158:LEU:CD1  | 2.23                     | 0.84              |
| 1:A:259:LEU:O    | 1:A:262:ASN:N    | 2.10                     | 0.84              |
| 1:A:533:ILE:HG12 | 1:A:562:TRP:HH2  | 1.41                     | 0.84              |
| 1:A:595:GLU:CB   | 2:B:469:ASP:HB3  | 2.07                     | 0.84              |
| 1:A:605:GLU:OE2  | 1:A:632:PHE:CE2  | 2.31                     | 0.84              |
| 2:B:418:TYR:O    | 2:B:419:VAL:O    | 1.93                     | 0.84              |
| 3:M:19:LEU:CD1   | 3:M:24:ALA:HB3   | 2.07                     | 0.84              |
| 3:M:82:LYS:O     | 3:M:84:LYS:HG2   | 1.78                     | 0.84              |
| 3:M:212:ASN:CG   | 3:M:250:LEU:HD23 | 1.97                     | 0.84              |
| 1:A:103:LYS:CD   | 1:A:131:ASP:CG   | 2.46                     | 0.84              |

*Continued on next page...*

*Continued from previous page...*

| Atom-1           | Atom-2           | Interatomic distance (Å) | Clash overlap (Å) |
|------------------|------------------|--------------------------|-------------------|
| 1:A:629:LEU:O    | 1:A:630:PRO:C    | 2.00                     | 0.84              |
| 2:B:490:ILE:O    | 2:B:515:PHE:CZ   | 2.30                     | 0.84              |
| 3:M:254:PRO:CB   | 3:M:454:ILE:HD12 | 2.06                     | 0.84              |
| 4:S:83:LEU:CD1   | 4:S:116:VAL:HG11 | 2.07                     | 0.84              |
| 1:A:64:LEU:HA    | 1:A:102:GLN:HE22 | 1.40                     | 0.84              |
| 1:A:179:LYS:HG3  | 1:A:217:ALA:HB2  | 1.58                     | 0.84              |
| 2:B:48:VAL:CG2   | 2:B:82:TYR:CE2   | 2.60                     | 0.84              |
| 3:M:233:LEU:HD22 | 3:M:324:SER:HA   | 1.59                     | 0.84              |
| 1:A:225:LEU:HD12 | 1:A:233:PHE:CZ   | 2.13                     | 0.84              |
| 2:B:182:ARG:CD   | 2:B:217:GLU:OE1  | 2.25                     | 0.84              |
| 2:B:353:GLN:HE21 | 3:M:47:SER:HB3   | 1.04                     | 0.84              |
| 2:B:396:ILE:HD13 | 2:B:432:ALA:CB   | 2.08                     | 0.84              |
| 3:M:293:PRO:O    | 3:M:293:PRO:CD   | 2.26                     | 0.84              |
| 4:S:15:ARG:HD2   | 4:S:122:ILE:HG12 | 1.58                     | 0.84              |
| 1:A:67:LYS:HB2   | 4:S:165:SER:C    | 1.97                     | 0.83              |
| 1:A:101:GLN:HG2  | 4:S:167:ILE:HG13 | 1.59                     | 0.83              |
| 1:A:253:ILE:HD13 | 1:A:281:LEU:CB   | 2.07                     | 0.83              |
| 2:B:264:THR:O    | 2:B:266:VAL:HG23 | 1.78                     | 0.83              |
| 2:B:534:ILE:CD1  | 2:B:594:ALA:HB3  | 1.99                     | 0.83              |
| 3:M:215:TYR:CG   | 3:M:469:GLY:N    | 2.25                     | 0.83              |
| 3:M:223:HIS:CD2  | 3:M:478:ASN:CB   | 2.61                     | 0.83              |
| 4:S:5:VAL:HG21   | 4:S:132:LEU:CG   | 2.08                     | 0.83              |
| 1:A:66:SER:N     | 4:S:165:SER:HB2  | 1.93                     | 0.83              |
| 2:B:70:MET:HE1   | 2:B:107:ARG:CG   | 2.07                     | 0.83              |
| 2:B:274:PRO:CA   | 2:B:295:ASN:HD21 | 1.90                     | 0.83              |
| 2:B:316:THR:OG1  | 3:M:90:PHE:CZ    | 2.19                     | 0.83              |
| 2:B:336:ASN:O    | 2:B:337:THR:CB   | 2.20                     | 0.83              |
| 2:B:344:VAL:HG22 | 2:B:363:ILE:CD1  | 2.06                     | 0.83              |
| 3:M:101:LEU:O    | 3:M:106:LYS:CA   | 2.26                     | 0.83              |
| 1:A:101:GLN:HE21 | 4:S:167:ILE:HG21 | 1.40                     | 0.83              |
| 1:A:103:LYS:N    | 4:S:163:THR:CG2  | 2.40                     | 0.83              |
| 1:A:211:ASP:CG   | 4:S:148:ARG:CD   | 2.31                     | 0.83              |
| 1:A:320:HIS:O    | 1:A:321:THR:C    | 2.14                     | 0.83              |
| 1:A:581:LEU:HD23 | 1:A:607:LEU:CD1  | 2.06                     | 0.83              |
| 1:A:586:GLU:HB2  | 1:A:604:LEU:CD1  | 2.07                     | 0.83              |
| 1:A:630:PRO:HG2  | 2:B:614:ILE:CB   | 2.05                     | 0.83              |
| 1:A:634:ASN:O    | 2:B:517:GLU:CA   | 2.27                     | 0.83              |
| 2:B:25:VAL:CG2   | 2:B:35:TYR:CD2   | 2.49                     | 0.83              |
| 2:B:102:HIS:ND1  | 2:B:137:PHE:HB3  | 1.90                     | 0.83              |
| 2:B:275:ARG:CB   | 2:B:291:TYR:CD2  | 2.61                     | 0.83              |
| 2:B:512:VAL:HG21 | 2:B:548:ILE:HG12 | 1.58                     | 0.83              |

*Continued on next page...*

*Continued from previous page...*

| Atom-1           | Atom-2           | Interatomic distance (Å) | Clash overlap (Å) |
|------------------|------------------|--------------------------|-------------------|
| 2:B:531:ARG:CB   | 2:B:591:MET:SD   | 2.66                     | 0.83              |
| 2:B:549:LEU:HD13 | 2:B:611:ALA:HB1  | 1.56                     | 0.83              |
| 3:M:403:THR:CG2  | 3:M:407:THR:OG1  | 2.26                     | 0.83              |
| 1:A:253:ILE:O    | 1:A:257:LEU:HG   | 1.78                     | 0.83              |
| 1:A:384:LEU:HD13 | 1:A:441:TYR:HE2  | 1.44                     | 0.83              |
| 1:A:585:PHE:CE2  | 1:A:607:LEU:HD11 | 2.14                     | 0.83              |
| 2:B:177:ILE:HD12 | 2:B:196:LEU:HD23 | 1.59                     | 0.83              |
| 2:B:232:ARG:HG3  | 2:B:236:ILE:CG1  | 2.06                     | 0.83              |
| 2:B:513:TRP:CA   | 2:B:551:LEU:HD11 | 2.07                     | 0.83              |
| 4:S:61:ASN:OD1   | 4:S:66:ASP:OD2   | 1.95                     | 0.83              |
| 1:A:255:ARG:HH21 | 4:S:135:ILE:HG23 | 1.43                     | 0.83              |
| 1:A:331:ARG:NH1  | 1:A:362:ASP:OD2  | 2.12                     | 0.83              |
| 2:B:159:LYS:CA   | 2:B:195:ILE:CD1  | 2.50                     | 0.83              |
| 4:S:53:THR:CA    | 4:S:69:ASN:CB    | 2.53                     | 0.83              |
| 1:A:140:VAL:HA   | 1:A:177:ILE:CD1  | 2.08                     | 0.83              |
| 1:A:306:GLU:O    | 1:A:307:ASP:C    | 2.12                     | 0.83              |
| 1:A:332:TYR:HE1  | 1:A:366:SER:CB   | 1.92                     | 0.83              |
| 2:B:173:VAL:HB   | 2:B:199:LEU:CD1  | 2.09                     | 0.83              |
| 2:B:177:ILE:O    | 2:B:181:TYR:HB2  | 1.78                     | 0.83              |
| 2:B:292:GLU:HG2  | 2:B:296:ASP:CB   | 2.09                     | 0.83              |
| 3:M:121:ILE:O    | 3:M:125:PHE:CD1  | 2.31                     | 0.83              |
| 3:M:261:ASN:O    | 3:M:446:GLY:O    | 1.97                     | 0.83              |
| 4:S:5:VAL:CG1    | 4:S:132:LEU:CD2  | 2.49                     | 0.83              |
| 1:A:403:LEU:HD11 | 1:A:421:PRO:O    | 1.79                     | 0.83              |
| 1:A:429:VAL:HG21 | 1:A:469:LEU:HD21 | 1.60                     | 0.83              |
| 2:B:178:ILE:CG2  | 2:B:214:ALA:O    | 2.26                     | 0.83              |
| 3:M:220:GLU:CG   | 3:M:439:TYR:HB2  | 2.07                     | 0.83              |
| 3:M:262:THR:HG22 | 3:M:264:GLY:CA   | 2.09                     | 0.83              |
| 1:A:95:MET:SD    | 1:A:107:TYR:HD2  | 2.00                     | 0.83              |
| 1:A:163:ALA:O    | 1:A:164:ASP:C    | 2.08                     | 0.83              |
| 3:M:218:LEU:HG   | 3:M:472:TYR:HE2  | 1.43                     | 0.83              |
| 3:M:224:VAL:O    | 3:M:479:PHE:HB3  | 1.79                     | 0.83              |
| 2:B:20:ARG:HH11  | 2:B:21:GLU:CG    | 1.91                     | 0.83              |
| 2:B:155:LEU:CB   | 2:B:188:TYR:HD2  | 1.91                     | 0.83              |
| 2:B:243:TRP:HZ2  | 3:M:94:GLU:C     | 1.82                     | 0.83              |
| 1:A:182:ILE:CD1  | 1:A:218:ALA:HB2  | 2.07                     | 0.83              |
| 1:A:275:LEU:HD21 | 1:A:311:THR:HG1  | 1.44                     | 0.83              |
| 1:A:403:LEU:CD2  | 1:A:422:GLU:CG   | 2.52                     | 0.83              |
| 1:A:637:GLU:HG3  | 2:B:515:PHE:N    | 1.68                     | 0.83              |
| 4:S:9:ASN:ND2    | 4:S:13:GLN:HB2   | 1.93                     | 0.83              |
| 4:S:53:THR:O     | 4:S:69:ASN:CG    | 2.17                     | 0.83              |

*Continued on next page...*

*Continued from previous page...*

| Atom-1           | Atom-2           | Interatomic distance (Å) | Clash overlap (Å) |
|------------------|------------------|--------------------------|-------------------|
| 1:A:559:PHE:HE1  | 1:A:581:LEU:HD22 | 1.43                     | 0.82              |
| 1:A:633:PHE:CD2  | 2:B:550:VAL:O    | 2.31                     | 0.82              |
| 2:B:50:LEU:HG    | 2:B:58:GLU:O     | 1.79                     | 0.82              |
| 2:B:231:ARG:HH21 | 2:B:297:PRO:HD2  | 1.44                     | 0.82              |
| 2:B:281:ASP:OD1  | 2:B:287:GLU:OE2  | 1.97                     | 0.82              |
| 2:B:566:ALA:C    | 2:B:574:ASN:CG   | 2.38                     | 0.82              |
| 3:M:219:LEU:HB3  | 3:M:472:TYR:O    | 1.79                     | 0.82              |
| 1:A:65:ASN:O     | 4:S:165:SER:HA   | 1.79                     | 0.82              |
| 1:A:140:VAL:N    | 1:A:177:ILE:CD1  | 2.41                     | 0.82              |
| 1:A:151:SER:HB2  | 1:A:187:LYS:HB3  | 1.59                     | 0.82              |
| 1:A:348:PHE:O    | 1:A:352:PHE:CD1  | 2.32                     | 0.82              |
| 1:A:566:PHE:CE1  | 1:A:618:THR:HB   | 2.14                     | 0.82              |
| 2:B:393:ILE:HG12 | 2:B:428:VAL:HA   | 1.62                     | 0.82              |
| 1:A:103:LYS:CD   | 1:A:131:ASP:OD1  | 2.28                     | 0.82              |
| 1:A:163:ALA:HB1  | 1:A:199:ASN:ND2  | 1.92                     | 0.82              |
| 1:A:621:LEU:O    | 1:A:622:PRO:C    | 1.97                     | 0.82              |
| 1:A:634:ASN:O    | 2:B:516:GLY:O    | 1.95                     | 0.82              |
| 2:B:42:ILE:HG12  | 2:B:65:ARG:HD3   | 1.60                     | 0.82              |
| 2:B:171:GLY:HA2  | 2:B:207:VAL:HG12 | 1.61                     | 0.82              |
| 2:B:505:ASP:HA   | 2:B:544:THR:OG1  | 1.79                     | 0.82              |
| 2:B:522:GLU:O    | 2:B:522:GLU:HG2  | 1.79                     | 0.82              |
| 3:M:262:THR:HG22 | 3:M:264:GLY:H    | 1.43                     | 0.82              |
| 4:S:47:GLN:HE22  | 4:S:78:LYS:HA    | 1.45                     | 0.82              |
| 1:A:260:PHE:CE2  | 1:A:274:LEU:HG   | 2.14                     | 0.82              |
| 1:A:564:ASN:OD1  | 1:A:622:PRO:HG3  | 1.78                     | 0.82              |
| 2:B:127:LEU:HB3  | 2:B:161:LEU:HD13 | 1.61                     | 0.82              |
| 2:B:158:VAL:CG1  | 2:B:195:ILE:HG21 | 2.08                     | 0.82              |
| 2:B:197:LYS:HD2  | 2:B:283:TYR:CE2  | 2.14                     | 0.82              |
| 2:B:310:ILE:HA   | 2:B:318:ILE:HG12 | 1.61                     | 0.82              |
| 2:B:527:PRO:HB2  | 2:B:587:ARG:CD   | 2.09                     | 0.82              |
| 2:B:562:ASN:CB   | 2:B:580:TYR:HB3  | 2.08                     | 0.82              |
| 4:S:83:LEU:HD11  | 4:S:116:VAL:CG1  | 2.07                     | 0.82              |
| 1:A:114:PHE:CG   | 1:A:153:ILE:HG23 | 2.13                     | 0.82              |
| 1:A:140:VAL:CG1  | 1:A:176:TYR:HB2  | 2.10                     | 0.82              |
| 1:A:144:GLY:HA2  | 1:A:180:LYS:HB2  | 1.61                     | 0.82              |
| 2:B:70:MET:HE3   | 2:B:107:ARG:HG3  | 1.59                     | 0.82              |
| 2:B:178:ILE:C    | 2:B:180:LEU:H    | 1.82                     | 0.82              |
| 2:B:311:TYR:HE2  | 2:B:342:ALA:HB1  | 1.40                     | 0.82              |
| 2:B:418:TYR:CD1  | 2:B:419:VAL:N    | 2.47                     | 0.82              |
| 2:B:493:LEU:CG   | 2:B:511:ILE:HG23 | 2.09                     | 0.82              |
| 2:B:542:PRO:O    | 2:B:602:ASP:OD2  | 1.95                     | 0.82              |

*Continued on next page...*

*Continued from previous page...*

| Atom-1           | Atom-2           | Interatomic distance (Å) | Clash overlap (Å) |
|------------------|------------------|--------------------------|-------------------|
| 2:B:592:TYR:CD2  | 2:B:618:PHE:CD2  | 2.67                     | 0.82              |
| 3:M:231:SER:O    | 3:M:326:HIS:HE1  | 1.62                     | 0.82              |
| 1:A:166:LEU:HD13 | 1:A:185:LEU:CG   | 2.09                     | 0.82              |
| 1:A:432:ILE:HG21 | 1:A:457:LEU:HD11 | 1.59                     | 0.82              |
| 2:B:42:ILE:O     | 2:B:46:GLN:OE1   | 1.96                     | 0.82              |
| 2:B:309:LEU:HD12 | 2:B:317:VAL:HG11 | 1.62                     | 0.82              |
| 2:B:344:VAL:HG13 | 2:B:381:PHE:HZ   | 1.42                     | 0.82              |
| 2:B:396:ILE:CD1  | 2:B:418:TYR:CZ   | 2.62                     | 0.82              |
| 2:B:512:VAL:HB   | 2:B:551:LEU:HD12 | 1.62                     | 0.82              |
| 1:A:217:ALA:O    | 4:S:142:ILE:HG22 | 1.77                     | 0.82              |
| 1:A:563:CYS:CB   | 1:A:621:LEU:CD1  | 2.55                     | 0.82              |
| 1:A:563:CYS:SG   | 1:A:621:LEU:CD1  | 2.68                     | 0.82              |
| 2:B:182:ARG:CZ   | 2:B:217:GLU:OE1  | 2.27                     | 0.82              |
| 2:B:431:MET:O    | 2:B:434:LYS:N    | 2.12                     | 0.82              |
| 3:M:3:LEU:HG     | 3:M:80:THR:O     | 1.79                     | 0.82              |
| 3:M:101:LEU:CA   | 3:M:109:LEU:HD13 | 2.09                     | 0.82              |
| 3:M:243:ILE:CG1  | 3:M:473:LYS:O    | 2.27                     | 0.82              |
| 1:A:140:VAL:CG1  | 1:A:176:TYR:CB   | 2.52                     | 0.82              |
| 1:A:255:ARG:HD3  | 4:S:141:VAL:O    | 1.80                     | 0.82              |
| 1:A:258:LYS:HZ1  | 4:S:97:ALA:CB    | 1.92                     | 0.82              |
| 1:A:258:LYS:NZ   | 4:S:97:ALA:CB    | 2.42                     | 0.82              |
| 2:B:230:PHE:HB3  | 2:B:298:ASP:OD2  | 1.80                     | 0.82              |
| 2:B:177:ILE:HD11 | 2:B:195:ILE:CG2  | 2.10                     | 0.82              |
| 2:B:197:LYS:HD2  | 2:B:283:TYR:CD2  | 2.15                     | 0.82              |
| 2:B:252:LEU:HB2  | 2:B:302:PHE:CE1  | 2.15                     | 0.82              |
| 2:B:568:VAL:O    | 2:B:571:SER:CB   | 2.28                     | 0.82              |
| 2:B:569:THR:C    | 2:B:571:SER:N    | 2.28                     | 0.82              |
| 1:A:288:THR:CB   | 1:A:322:PHE:HZ   | 1.93                     | 0.82              |
| 1:A:520:GLY:HA3  | 1:A:558:VAL:HG22 | 0.86                     | 0.82              |
| 2:B:353:GLN:CB   | 3:M:50:TYR:N     | 2.39                     | 0.82              |
| 2:B:360:LEU:HD12 | 2:B:391:ALA:HA   | 1.60                     | 0.82              |
| 2:B:437:SER:HB2  | 2:B:474:VAL:HG13 | 1.60                     | 0.82              |
| 3:M:290:PHE:CE1  | 3:M:297:PHE:CG   | 2.66                     | 0.82              |
| 3:M:353:VAL:HG22 | 3:M:354:ASP:O    | 1.80                     | 0.82              |
| 1:A:71:VAL:CG1   | 1:A:105:VAL:CG1  | 2.56                     | 0.81              |
| 1:A:219:VAL:HG12 | 1:A:259:LEU:CD1  | 2.08                     | 0.81              |
| 2:B:120:ILE:HG23 | 2:B:154:ILE:CG1  | 2.10                     | 0.81              |
| 2:B:199:LEU:C    | 2:B:201:ALA:N    | 2.30                     | 0.81              |
| 2:B:578:PRO:HB2  | 2:B:579:PRO:CD   | 2.07                     | 0.81              |
| 3:M:241:HIS:O    | 3:M:474:THR:OG1  | 1.97                     | 0.81              |
| 4:S:54:PRO:CB    | 4:S:57:LEU:HD11  | 2.10                     | 0.81              |

*Continued on next page...*

*Continued from previous page...*

| Atom-1           | Atom-2           | Interatomic distance (Å) | Clash overlap (Å) |
|------------------|------------------|--------------------------|-------------------|
| 1:A:129:LYS:HD2  | 1:A:161:ASP:CG   | 2.00                     | 0.81              |
| 1:A:163:ALA:HB1  | 1:A:199:ASN:HD21 | 1.43                     | 0.81              |
| 1:A:189:PHE:CD2  | 1:A:225:LEU:CD2  | 2.60                     | 0.81              |
| 1:A:219:VAL:CG1  | 1:A:256:LEU:HD23 | 2.09                     | 0.81              |
| 1:A:263:LEU:O    | 1:A:266:VAL:N    | 2.12                     | 0.81              |
| 1:A:298:ILE:O    | 1:A:299:VAL:C    | 2.16                     | 0.81              |
| 2:B:170:ARG:HG2  | 2:B:199:LEU:HD23 | 1.61                     | 0.81              |
| 2:B:340:ILE:CD1  | 2:B:366:LEU:HB3  | 2.09                     | 0.81              |
| 3:M:7:ILE:HA     | 3:M:75:TRP:O     | 1.80                     | 0.81              |
| 3:M:101:LEU:CD2  | 3:M:106:LYS:O    | 2.28                     | 0.81              |
| 3:M:344:ILE:HG23 | 3:M:347:PHE:HB3  | 0.93                     | 0.81              |
| 1:A:147:LEU:CB   | 1:A:184:ALA:HB2  | 2.10                     | 0.81              |
| 1:A:178:ARG:NH1  | 1:A:209:ASP:CG   | 2.33                     | 0.81              |
| 1:A:566:PHE:HE1  | 1:A:618:THR:HB   | 1.43                     | 0.81              |
| 2:B:90:ILE:CD1   | 2:B:123:LEU:CD2  | 2.58                     | 0.81              |
| 2:B:116:THR:HG22 | 2:B:150:LEU:HD21 | 1.60                     | 0.81              |
| 2:B:171:GLY:N    | 2:B:207:VAL:CG1  | 2.34                     | 0.81              |
| 2:B:239:GLN:OE1  | 3:M:278:ILE:O    | 1.98                     | 0.81              |
| 2:B:374:PHE:CD2  | 2:B:402:LEU:HD11 | 2.15                     | 0.81              |
| 2:B:490:ILE:HG23 | 2:B:515:PHE:CE2  | 2.16                     | 0.81              |
| 2:B:527:PRO:HG2  | 2:B:587:ARG:HG2  | 1.61                     | 0.81              |
| 2:B:556:LEU:CB   | 2:B:588:ILE:HD11 | 2.10                     | 0.81              |
| 3:M:245:ASP:CA   | 3:M:472:TYR:CE1  | 2.63                     | 0.81              |
| 3:M:257:ALA:HB2  | 3:M:455:VAL:HG21 | 1.60                     | 0.81              |
| 3:M:374:TYR:HA   | 3:M:417:TYR:HA   | 1.63                     | 0.81              |
| 1:A:298:ILE:CD1  | 1:A:311:THR:HG21 | 2.10                     | 0.81              |
| 3:M:339:GLU:OE2  | 3:M:412:ARG:NE   | 2.07                     | 0.81              |
| 1:A:96:SER:HB3   | 1:A:127:LEU:HD13 | 1.60                     | 0.81              |
| 1:A:103:LYS:CE   | 1:A:131:ASP:CG   | 2.49                     | 0.81              |
| 1:A:104:ARG:HE   | 4:S:160:ALA:HB2  | 1.45                     | 0.81              |
| 1:A:408:ILE:HG21 | 4:S:64:ASN:O     | 1.79                     | 0.81              |
| 2:B:120:ILE:HG23 | 2:B:142:LEU:HD22 | 1.63                     | 0.81              |
| 2:B:182:ARG:HD2  | 2:B:217:GLU:CB   | 2.10                     | 0.81              |
| 2:B:182:ARG:CG   | 2:B:217:GLU:HB3  | 2.10                     | 0.81              |
| 2:B:553:ALA:CA   | 2:B:614:ILE:HG21 | 2.11                     | 0.81              |
| 3:M:458:LEU:HD22 | 3:M:462:LYS:HG2  | 1.62                     | 0.81              |
| 1:A:211:ASP:OD1  | 1:A:213:SER:N    | 2.14                     | 0.81              |
| 1:A:634:ASN:HD22 | 2:B:554:LYS:HB3  | 1.46                     | 0.81              |
| 2:B:109:ALA:O    | 2:B:110:GLU:C    | 2.06                     | 0.81              |
| 2:B:123:LEU:CB   | 2:B:142:LEU:HD11 | 2.09                     | 0.81              |
| 2:B:158:VAL:HG13 | 2:B:177:ILE:HD11 | 1.61                     | 0.81              |

*Continued on next page...*

*Continued from previous page...*

| Atom-1           | Atom-2           | Interatomic distance (Å) | Clash overlap (Å) |
|------------------|------------------|--------------------------|-------------------|
| 2:B:223:LEU:O    | 2:B:224:GLU:C    | 2.11                     | 0.81              |
| 2:B:277:CYS:HA   | 2:B:292:GLU:HG3  | 1.61                     | 0.81              |
| 2:B:303:LEU:CD1  | 2:B:333:GLN:CG   | 2.55                     | 0.81              |
| 3:M:245:ASP:HB3  | 3:M:472:TYR:CD1  | 2.16                     | 0.81              |
| 4:S:48:SER:C     | 4:S:77:TYR:HB2   | 2.00                     | 0.81              |
| 1:A:71:VAL:HG11  | 1:A:105:VAL:CG1  | 2.11                     | 0.81              |
| 1:A:260:PHE:CE1  | 1:A:274:LEU:HD12 | 2.15                     | 0.81              |
| 1:A:567:GLN:O    | 1:A:568:GLU:C    | 2.17                     | 0.81              |
| 1:A:586:GLU:N    | 1:A:604:LEU:HD12 | 1.94                     | 0.81              |
| 2:B:90:ILE:HD13  | 2:B:123:LEU:CD2  | 2.10                     | 0.81              |
| 3:M:49:ASP:HA    | 3:M:75:TRP:HH2   | 1.40                     | 0.81              |
| 3:M:101:LEU:HG   | 3:M:106:LYS:HA   | 0.81                     | 0.81              |
| 1:A:96:SER:H     | 1:A:127:LEU:HD21 | 0.98                     | 0.81              |
| 1:A:102:GLN:NE2  | 4:S:165:SER:H    | 1.79                     | 0.81              |
| 1:A:225:LEU:HD12 | 1:A:233:PHE:CE2  | 2.16                     | 0.81              |
| 1:A:346:THR:O    | 1:A:347:ASP:C    | 2.10                     | 0.81              |
| 1:A:532:LEU:O    | 1:A:533:ILE:C    | 2.00                     | 0.81              |
| 2:B:151:ALA:CA   | 2:B:180:LEU:CD1  | 2.44                     | 0.81              |
| 2:B:396:ILE:CD1  | 2:B:418:TYR:OH   | 2.29                     | 0.81              |
| 2:B:563:PHE:C    | 2:B:566:ALA:HB3  | 2.02                     | 0.81              |
| 4:S:9:ASN:ND2    | 4:S:13:GLN:CG    | 2.44                     | 0.81              |
| 1:A:99:LYS:CE    | 4:S:164:ASP:HB2  | 2.11                     | 0.81              |
| 1:A:140:VAL:HA   | 1:A:177:ILE:HG12 | 0.81                     | 0.81              |
| 1:A:140:VAL:CA   | 1:A:177:ILE:CD1  | 2.59                     | 0.81              |
| 1:A:163:ALA:CB   | 1:A:199:ASN:HD21 | 1.94                     | 0.81              |
| 1:A:237:SER:HB2  | 1:A:270:LEU:CD1  | 2.11                     | 0.81              |
| 2:B:47:LEU:HD22  | 2:B:62:ALA:O     | 1.80                     | 0.81              |
| 2:B:214:ALA:O    | 2:B:217:GLU:N    | 2.13                     | 0.81              |
| 2:B:219:TYR:O    | 2:B:220:ALA:C    | 2.16                     | 0.81              |
| 2:B:353:GLN:CB   | 3:M:49:ASP:H     | 1.78                     | 0.81              |
| 2:B:433:VAL:CG1  | 2:B:474:VAL:CB   | 2.51                     | 0.81              |
| 2:B:477:MET:O    | 2:B:480:GLN:HB2  | 1.80                     | 0.81              |
| 2:B:527:PRO:CG   | 2:B:587:ARG:CG   | 2.51                     | 0.81              |
| 3:M:69:ILE:CD1   | 3:M:90:PHE:CE1   | 2.64                     | 0.81              |
| 3:M:101:LEU:HD23 | 3:M:106:LYS:HG3  | 1.62                     | 0.81              |
| 3:M:212:ASN:HB3  | 3:M:250:LEU:HA   | 1.63                     | 0.81              |
| 1:A:103:LYS:HD3  | 1:A:131:ASP:OD2  | 1.81                     | 0.81              |
| 1:A:140:VAL:CG1  | 1:A:176:TYR:HB3  | 2.09                     | 0.81              |
| 1:A:182:ILE:O    | 1:A:221:VAL:HG21 | 1.81                     | 0.81              |
| 1:A:202:LYS:O    | 1:A:205:SER:N    | 2.13                     | 0.81              |
| 1:A:631:SER:HB2  | 2:B:557:SER:CB   | 1.92                     | 0.81              |

*Continued on next page...*



*Continued from previous page...*

| Atom-1           | Atom-2           | Interatomic distance (Å) | Clash overlap (Å) |
|------------------|------------------|--------------------------|-------------------|
| 2:B:77:ILE:O     | 2:B:78:ASP:C     | 2.17                     | 0.81              |
| 2:B:87:VAL:HG12  | 2:B:122:SER:CB   | 1.77                     | 0.81              |
| 2:B:343:LEU:HD22 | 2:B:362:ALA:HB1  | 1.62                     | 0.81              |
| 2:B:545:ARG:HH11 | 2:B:602:ASP:HA   | 1.45                     | 0.81              |
| 3:M:224:VAL:HG11 | 3:M:226:PHE:CZ   | 2.16                     | 0.81              |
| 3:M:310:VAL:HG13 | 3:M:315:VAL:O    | 1.81                     | 0.81              |
| 3:M:342:LEU:CD1  | 3:M:411:LEU:CD2  | 2.56                     | 0.81              |
| 1:A:68:THR:CA    | 4:S:167:ILE:N    | 2.44                     | 0.80              |
| 1:A:105:VAL:CA   | 4:S:167:ILE:CD1  | 2.59                     | 0.80              |
| 1:A:215:VAL:HG22 | 1:A:243:ILE:CG1  | 2.10                     | 0.80              |
| 1:A:463:ASP:C    | 2:B:1:MET:SD     | 2.59                     | 0.80              |
| 1:A:637:GLU:HB3  | 2:B:516:GLY:N    | 1.96                     | 0.80              |
| 2:B:136:CYS:O    | 2:B:172:GLU:HB3  | 1.80                     | 0.80              |
| 2:B:260:LEU:CD2  | 2:B:291:TYR:CZ   | 2.53                     | 0.80              |
| 2:B:380:LYS:HZ3  | 3:M:236:LEU:CG   | 1.94                     | 0.80              |
| 2:B:472:VAL:HG11 | 2:B:510:GLY:C    | 2.01                     | 0.80              |
| 2:B:560:ILE:HA   | 2:B:564:LYS:H    | 1.46                     | 0.80              |
| 3:M:7:ILE:CG2    | 3:M:75:TRP:O     | 2.29                     | 0.80              |
| 1:A:488:ARG:O    | 1:A:491:THR:OG1  | 1.99                     | 0.80              |
| 2:B:296:ASP:OD1  | 2:B:297:PRO:CD   | 2.29                     | 0.80              |
| 2:B:337:THR:CA   | 2:B:373:LEU:CD2  | 2.40                     | 0.80              |
| 2:B:425:PRO:HD2  | 2:B:428:VAL:HG21 | 1.61                     | 0.80              |
| 2:B:508:ARG:HB3  | 2:B:544:THR:CG2  | 2.12                     | 0.80              |
| 3:M:223:HIS:HA   | 3:M:479:PHE:CG   | 2.13                     | 0.80              |
| 3:M:340:LEU:HG   | 3:M:411:LEU:CB   | 2.09                     | 0.80              |
| 4:S:108:SER:CB   | 4:S:149:ILE:HG21 | 2.10                     | 0.80              |
| 1:A:244:LEU:CD1  | 1:A:256:LEU:HD13 | 2.11                     | 0.80              |
| 1:A:264:SER:CB   | 1:A:271:ARG:CD   | 2.59                     | 0.80              |
| 1:A:408:ILE:HD12 | 1:A:410:TYR:CD1  | 2.15                     | 0.80              |
| 1:A:609:LEU:CG   | 1:A:628:VAL:CB   | 2.48                     | 0.80              |
| 1:A:637:GLU:CB   | 2:B:516:GLY:N    | 2.44                     | 0.80              |
| 2:B:90:ILE:CD1   | 2:B:123:LEU:HD23 | 2.11                     | 0.80              |
| 2:B:135:ARG:NH1  | 2:B:164:ASP:HB2  | 1.97                     | 0.80              |
| 2:B:177:ILE:HG21 | 2:B:196:LEU:CG   | 2.10                     | 0.80              |
| 2:B:178:ILE:HG22 | 2:B:179:LYS:H    | 1.44                     | 0.80              |
| 2:B:252:LEU:CB   | 2:B:302:PHE:CE2  | 2.65                     | 0.80              |
| 2:B:256:CYS:HA   | 2:B:293:VAL:CG2  | 2.05                     | 0.80              |
| 2:B:563:PHE:O    | 2:B:566:ALA:HB3  | 1.80                     | 0.80              |
| 3:M:215:TYR:CD2  | 3:M:469:GLY:CA   | 2.65                     | 0.80              |
| 4:S:7:ILE:CG2    | 4:S:121:LEU:HD21 | 2.09                     | 0.80              |
| 1:A:64:LEU:O     | 1:A:65:ASN:C     | 2.19                     | 0.80              |

*Continued on next page...*

*Continued from previous page...*

| Atom-1           | Atom-2           | Interatomic distance (Å) | Clash overlap (Å) |
|------------------|------------------|--------------------------|-------------------|
| 2:B:433:VAL:HG11 | 2:B:471:TYR:HA   | 1.61                     | 0.80              |
| 1:A:96:SER:CB    | 1:A:127:LEU:CD2  | 2.60                     | 0.80              |
| 1:A:222:ILE:HG23 | 1:A:233:PHE:HB3  | 1.64                     | 0.80              |
| 2:B:315:PRO:CG   | 2:B:352:ASN:OD1  | 2.28                     | 0.80              |
| 2:B:546:CYS:HA   | 2:B:607:ILE:HG23 | 0.82                     | 0.80              |
| 3:M:71:LYS:O     | 3:M:74:TYR:CE2   | 2.34                     | 0.80              |
| 1:A:101:GLN:NE2  | 4:S:167:ILE:HG21 | 1.93                     | 0.80              |
| 1:A:207:LEU:HD11 | 1:A:240:LEU:HD23 | 1.62                     | 0.80              |
| 1:A:253:ILE:HD11 | 1:A:281:LEU:CD2  | 2.09                     | 0.80              |
| 1:A:279:LEU:O    | 1:A:280:GLU:C    | 2.11                     | 0.80              |
| 1:A:465:SER:H    | 2:B:1:MET:HG2    | 1.47                     | 0.80              |
| 1:A:557:LYS:HB3  | 2:B:605:PHE:CE2  | 2.15                     | 0.80              |
| 1:A:608:ARG:NH2  | 1:A:632:PHE:CZ   | 2.49                     | 0.80              |
| 2:B:230:PHE:CD2  | 2:B:298:ASP:CB   | 2.63                     | 0.80              |
| 2:B:486:HIS:NE2  | 2:B:518:ILE:HB   | 1.95                     | 0.80              |
| 2:B:560:ILE:CG2  | 2:B:564:LYS:HB2  | 2.11                     | 0.80              |
| 3:M:18:TYR:CD1   | 3:M:122:SER:CB   | 2.64                     | 0.80              |
| 1:A:170:LEU:O    | 1:A:206:LYS:CE   | 2.28                     | 0.80              |
| 1:A:213:SER:C    | 4:S:143:GLU:HG2  | 2.01                     | 0.80              |
| 1:A:384:LEU:CD1  | 1:A:441:TYR:HE2  | 1.94                     | 0.80              |
| 1:A:399:ASP:HA   | 1:A:420:ILE:HB   | 0.87                     | 0.80              |
| 1:A:545:HIS:O    | 1:A:546:SER:C    | 2.07                     | 0.80              |
| 1:A:582:ILE:HD11 | 1:A:608:ARG:HA   | 1.64                     | 0.80              |
| 2:B:230:PHE:O    | 2:B:231:ARG:C    | 1.96                     | 0.80              |
| 2:B:266:VAL:HG13 | 2:B:291:TYR:H    | 1.46                     | 0.80              |
| 2:B:344:VAL:CG2  | 2:B:363:ILE:HD11 | 2.12                     | 0.80              |
| 2:B:371:GLN:CD   | 2:B:401:THR:O    | 2.20                     | 0.80              |
| 2:B:525:ILE:C    | 2:B:527:PRO:CD   | 2.50                     | 0.80              |
| 4:S:14:PRO:HB3   | 4:S:36:TYR:HE1   | 1.47                     | 0.80              |
| 4:S:108:SER:HB3  | 4:S:149:ILE:CG2  | 2.12                     | 0.80              |
| 1:A:224:GLU:CG   | 4:S:138:GLY:O    | 2.30                     | 0.80              |
| 1:A:392:MET:SD   | 1:A:457:LEU:HD23 | 2.22                     | 0.80              |
| 1:A:537:THR:CB   | 1:A:584:PHE:CE1  | 2.64                     | 0.80              |
| 2:B:200:MET:HE3  | 2:B:232:ARG:H    | 1.47                     | 0.80              |
| 3:M:66:PHE:HB3   | 3:M:77:LEU:CD2   | 2.10                     | 0.80              |
| 4:S:87:PHE:CG    | 4:S:102:ILE:HG12 | 2.15                     | 0.80              |
| 4:S:109:LEU:O    | 4:S:110:ASP:C    | 2.13                     | 0.80              |
| 1:A:426:ILE:CG1  | 1:A:464:ILE:HD13 | 2.12                     | 0.80              |
| 1:A:436:CYS:SG   | 1:A:450:TYR:CZ   | 2.75                     | 0.80              |
| 2:B:527:PRO:HB2  | 2:B:587:ARG:HD2  | 1.62                     | 0.80              |
| 2:B:550:VAL:CG2  | 2:B:610:ARG:CD   | 2.60                     | 0.80              |

*Continued on next page...*

*Continued from previous page...*

| Atom-1           | Atom-2           | Interatomic distance (Å) | Clash overlap (Å) |
|------------------|------------------|--------------------------|-------------------|
| 3:M:71:LYS:O     | 3:M:72:LEU:CB    | 2.30                     | 0.80              |
| 1:A:151:SER:CB   | 1:A:187:LYS:HB2  | 2.12                     | 0.80              |
| 2:B:62:ALA:HB1   | 2:B:66:ILE:HD11  | 1.64                     | 0.80              |
| 2:B:337:THR:HG23 | 2:B:373:LEU:CD1  | 2.12                     | 0.80              |
| 3:M:245:ASP:O    | 3:M:472:TYR:CZ   | 2.34                     | 0.80              |
| 1:A:178:ARG:NH1  | 1:A:209:ASP:CB   | 2.44                     | 0.79              |
| 1:A:291:ILE:HG21 | 1:A:322:PHE:HE1  | 1.44                     | 0.79              |
| 2:B:47:LEU:CD2   | 2:B:62:ALA:O     | 2.30                     | 0.79              |
| 2:B:219:TYR:HE1  | 2:B:226:LEU:HD12 | 1.47                     | 0.79              |
| 2:B:352:ASN:O    | 2:B:355:ASN:HB2  | 1.81                     | 0.79              |
| 2:B:519:ALA:O    | 2:B:523:PHE:HD2  | 1.65                     | 0.79              |
| 3:M:223:HIS:CB   | 3:M:478:ASN:HA   | 2.12                     | 0.79              |
| 1:A:125:THR:CB   | 1:A:158:LEU:HD13 | 2.12                     | 0.79              |
| 1:A:145:ILE:HG12 | 4:S:156:LEU:HD22 | 1.62                     | 0.79              |
| 2:B:170:ARG:NH1  | 2:B:198:GLU:O    | 2.15                     | 0.79              |
| 2:B:189:HIS:CD2  | 2:B:222:HIS:HB3  | 2.17                     | 0.79              |
| 2:B:341:GLU:HG2  | 2:B:345:ARG:HE   | 1.46                     | 0.79              |
| 2:B:389:ILE:O    | 2:B:390:VAL:C    | 2.17                     | 0.79              |
| 2:B:458:MET:O    | 2:B:459:GLU:C    | 2.19                     | 0.79              |
| 1:A:185:LEU:HD22 | 1:A:189:PHE:CZ   | 2.16                     | 0.79              |
| 2:B:50:LEU:CB    | 2:B:62:ALA:HB2   | 2.13                     | 0.79              |
| 2:B:63:MET:CG    | 2:B:100:LEU:HB3  | 2.12                     | 0.79              |
| 2:B:178:ILE:HG21 | 2:B:214:ALA:CA   | 2.12                     | 0.79              |
| 2:B:217:GLU:O    | 2:B:219:TYR:N    | 2.15                     | 0.79              |
| 2:B:245:GLN:NE2  | 2:B:309:LEU:CD1  | 2.45                     | 0.79              |
| 2:B:374:PHE:CE2  | 2:B:398:ILE:CG2  | 2.66                     | 0.79              |
| 3:M:379:LEU:HD23 | 3:M:397:TRP:CD1  | 2.17                     | 0.79              |
| 1:A:96:SER:CB    | 1:A:127:LEU:HD21 | 2.11                     | 0.79              |
| 1:A:137:ASN:C    | 1:A:139:ASP:N    | 2.28                     | 0.79              |
| 1:A:182:ILE:HD13 | 1:A:218:ALA:CB   | 2.12                     | 0.79              |
| 1:A:291:ILE:HG21 | 1:A:322:PHE:CE1  | 2.17                     | 0.79              |
| 2:B:63:MET:SD    | 2:B:101:ILE:HA   | 2.22                     | 0.79              |
| 2:B:139:LEU:CD2  | 2:B:173:VAL:C    | 2.50                     | 0.79              |
| 2:B:162:VAL:HG23 | 2:B:199:LEU:HD11 | 1.61                     | 0.79              |
| 2:B:174:ALA:HB3  | 2:B:211:ALA:CA   | 2.09                     | 0.79              |
| 2:B:178:ILE:O    | 2:B:181:TYR:N    | 2.16                     | 0.79              |
| 3:M:65:TYR:CD1   | 3:M:86:PRO:CB    | 2.65                     | 0.79              |
| 3:M:69:ILE:CG1   | 3:M:90:PHE:CE1   | 2.66                     | 0.79              |
| 1:A:102:GLN:N    | 4:S:167:ILE:HG12 | 1.97                     | 0.79              |
| 1:A:170:LEU:C    | 1:A:206:LYS:HD2  | 2.02                     | 0.79              |
| 1:A:461:CYS:O    | 1:A:462:GLN:C    | 2.08                     | 0.79              |

*Continued on next page...*

*Continued from previous page...*

| Atom-1           | Atom-2           | Interatomic distance (Å) | Clash overlap (Å) |
|------------------|------------------|--------------------------|-------------------|
| 2:B:116:THR:HG22 | 2:B:150:LEU:CD2  | 2.12                     | 0.79              |
| 2:B:353:GLN:HG2  | 3:M:48:ASP:N     | 1.97                     | 0.79              |
| 2:B:490:ILE:CG2  | 2:B:515:PHE:CD2  | 2.66                     | 0.79              |
| 3:M:65:TYR:CD1   | 3:M:86:PRO:CG    | 2.65                     | 0.79              |
| 1:A:217:ALA:CB   | 4:S:142:ILE:CB   | 2.52                     | 0.79              |
| 1:A:260:PHE:CE1  | 1:A:274:LEU:CD1  | 2.65                     | 0.79              |
| 1:A:605:GLU:HG2  | 1:A:632:PHE:CG   | 2.17                     | 0.79              |
| 1:A:636:TYR:H    | 2:B:554:LYS:HD3  | 1.47                     | 0.79              |
| 2:B:42:ILE:HD13  | 2:B:65:ARG:HD3   | 1.61                     | 0.79              |
| 1:A:137:ASN:C    | 1:A:139:ASP:H    | 1.80                     | 0.79              |
| 1:A:220:SER:HB2  | 4:S:141:VAL:C    | 2.02                     | 0.79              |
| 1:A:326:GLN:CA   | 1:A:331:ARG:NH2  | 2.42                     | 0.79              |
| 1:A:393:LYS:NZ   | 1:A:397:ASP:OD2  | 2.16                     | 0.79              |
| 2:B:42:ILE:O     | 2:B:43:ASN:HB2   | 1.83                     | 0.79              |
| 2:B:216:LYS:HG3  | 2:B:251:LEU:HD12 | 1.63                     | 0.79              |
| 2:B:236:ILE:HG22 | 2:B:240:LEU:CD1  | 2.12                     | 0.79              |
| 2:B:367:SER:OG   | 2:B:401:THR:CG2  | 2.30                     | 0.79              |
| 2:B:556:LEU:HB3  | 2:B:618:PHE:CD1  | 2.18                     | 0.79              |
| 1:A:142:LYS:CA   | 4:S:159:ALA:CB   | 2.61                     | 0.79              |
| 1:A:143:VAL:HG11 | 1:A:169:MET:HB3  | 1.65                     | 0.79              |
| 1:A:189:PHE:CD2  | 1:A:225:LEU:HD11 | 2.17                     | 0.79              |
| 1:A:244:LEU:CD1  | 1:A:256:LEU:CD1  | 2.59                     | 0.79              |
| 1:A:254:ILE:CG2  | 1:A:293:GLU:HG2  | 2.10                     | 0.79              |
| 2:B:136:CYS:C    | 2:B:172:GLU:CG   | 2.50                     | 0.79              |
| 2:B:170:ARG:CA   | 2:B:199:LEU:CD2  | 2.48                     | 0.79              |
| 3:M:262:THR:C    | 3:M:264:GLY:H    | 1.86                     | 0.79              |
| 3:M:374:TYR:CB   | 3:M:417:TYR:HD2  | 1.95                     | 0.79              |
| 1:A:557:LYS:HD3  | 2:B:605:PHE:CB   | 2.10                     | 0.79              |
| 1:A:628:VAL:O    | 1:A:631:SER:OG   | 2.00                     | 0.79              |
| 2:B:137:PHE:N    | 2:B:172:GLU:HG3  | 1.98                     | 0.79              |
| 4:S:53:THR:HB    | 4:S:69:ASN:CB    | 2.13                     | 0.79              |
| 1:A:371:ALA:O    | 1:A:374:LEU:N    | 2.16                     | 0.79              |
| 1:A:461:CYS:SG   | 1:A:469:LEU:HB3  | 2.23                     | 0.79              |
| 2:B:123:LEU:O    | 2:B:127:LEU:CD1  | 2.30                     | 0.79              |
| 2:B:151:ALA:HB3  | 2:B:184:GLY:HA3  | 1.64                     | 0.79              |
| 2:B:155:LEU:O    | 2:B:157:THR:N    | 2.16                     | 0.79              |
| 2:B:309:LEU:CB   | 2:B:317:VAL:HG11 | 2.06                     | 0.79              |
| 2:B:567:GLN:HG3  | 2:B:585:GLY:HA3  | 1.62                     | 0.79              |
| 3:M:356:LEU:CD2  | 3:M:358:ILE:HG13 | 2.13                     | 0.79              |
| 3:M:374:TYR:O    | 3:M:390:ILE:CD1  | 2.31                     | 0.79              |
| 4:S:3:HIS:O      | 4:S:19:PHE:HA    | 1.82                     | 0.79              |

*Continued on next page...*

*Continued from previous page...*

| Atom-1           | Atom-2           | Interatomic distance (Å) | Clash overlap (Å) |
|------------------|------------------|--------------------------|-------------------|
| 4:S:6:LEU:HD13   | 4:S:32:LEU:HD13  | 1.65                     | 0.79              |
| 1:A:145:ILE:CG1  | 4:S:156:LEU:HD22 | 2.13                     | 0.78              |
| 2:B:25:VAL:CB    | 2:B:36:THR:OG1   | 2.31                     | 0.78              |
| 2:B:37:TYR:O     | 2:B:40:GLN:N     | 2.16                     | 0.78              |
| 2:B:165:PRO:HA   | 2:B:170:ARG:NH2  | 1.96                     | 0.78              |
| 2:B:178:ILE:HB   | 2:B:214:ALA:HB1  | 1.65                     | 0.78              |
| 4:S:9:ASN:HD21   | 4:S:13:GLN:HG3   | 1.46                     | 0.78              |
| 1:A:74:LEU:CD2   | 1:A:87:CYS:SG    | 2.70                     | 0.78              |
| 1:A:102:GLN:CG   | 4:S:166:LYS:N    | 1.94                     | 0.78              |
| 1:A:440:ASN:OD1  | 1:A:442:SER:HB3  | 1.83                     | 0.78              |
| 2:B:123:LEU:HB2  | 2:B:142:LEU:HD11 | 1.66                     | 0.78              |
| 2:B:151:ALA:CB   | 2:B:184:GLY:HA3  | 2.13                     | 0.78              |
| 2:B:219:TYR:CE1  | 2:B:226:LEU:HA   | 2.06                     | 0.78              |
| 2:B:219:TYR:HB2  | 2:B:255:TYR:HD1  | 1.45                     | 0.78              |
| 2:B:267:ASP:O    | 2:B:276:SER:CB   | 2.31                     | 0.78              |
| 2:B:311:TYR:CZ   | 2:B:342:ALA:HB2  | 2.19                     | 0.78              |
| 2:B:339:PHE:O    | 2:B:343:LEU:HB2  | 1.81                     | 0.78              |
| 2:B:531:ARG:HB2  | 2:B:591:MET:SD   | 2.23                     | 0.78              |
| 3:M:9:ASP:C      | 3:M:75:TRP:HD1   | 1.85                     | 0.78              |
| 3:M:16:PHE:HA    | 3:M:118:TYR:CD1  | 2.18                     | 0.78              |
| 3:M:320:ILE:HG21 | 3:M:439:TYR:CE2  | 2.18                     | 0.78              |
| 3:M:342:LEU:HD12 | 3:M:411:LEU:CB   | 2.10                     | 0.78              |
| 1:A:80:TYR:CB    | 1:A:82:PHE:CD2   | 2.65                     | 0.78              |
| 1:A:519:LEU:O    | 1:A:520:GLY:C    | 2.13                     | 0.78              |
| 2:B:120:ILE:CD1  | 2:B:142:LEU:HD23 | 2.13                     | 0.78              |
| 2:B:267:ASP:CA   | 2:B:289:PRO:HG3  | 2.14                     | 0.78              |
| 2:B:537:PHE:CE2  | 2:B:598:LEU:HB3  | 2.13                     | 0.78              |
| 3:M:101:LEU:CB   | 3:M:106:LYS:HA   | 2.14                     | 0.78              |
| 3:M:104:PHE:HZ   | 3:M:113:LYS:CE   | 1.54                     | 0.78              |
| 1:A:67:LYS:CB    | 1:A:94:VAL:HG22  | 2.12                     | 0.78              |
| 1:A:114:PHE:CD1  | 1:A:153:ILE:HG23 | 2.18                     | 0.78              |
| 2:B:83:PHE:CE2   | 2:B:119:SER:CA   | 2.47                     | 0.78              |
| 2:B:148:SER:O    | 2:B:183:ALA:HB3  | 1.70                     | 0.78              |
| 2:B:501:THR:HA   | 2:B:508:ARG:HH22 | 1.47                     | 0.78              |
| 3:M:95:THR:O     | 3:M:99:ILE:HD13  | 1.82                     | 0.78              |
| 3:M:233:LEU:HD22 | 3:M:323:MET:O    | 1.82                     | 0.78              |
| 3:M:338:PHE:HD2  | 3:M:415:ILE:HG13 | 1.48                     | 0.78              |
| 3:M:362:PHE:O    | 3:M:363:ASN:O    | 2.00                     | 0.78              |
| 3:M:449:VAL:HG12 | 3:M:452:ILE:CD1  | 1.96                     | 0.78              |
| 4:S:8:PHE:HZ     | 4:S:84:TYR:HB3   | 1.45                     | 0.78              |
| 1:A:241:TYR:C    | 1:A:242:GLU:O    | 2.02                     | 0.78              |

*Continued on next page...*

*Continued from previous page...*

| Atom-1           | Atom-2           | Interatomic distance (Å) | Clash overlap (Å) |
|------------------|------------------|--------------------------|-------------------|
| 1:A:629:LEU:HD21 | 2:B:610:ARG:HD3  | 1.65                     | 0.78              |
| 1:A:637:GLU:CG   | 2:B:515:PHE:N    | 2.36                     | 0.78              |
| 3:M:67:SER:OG    | 3:M:90:PHE:HB2   | 1.84                     | 0.78              |
| 1:A:147:LEU:HD12 | 1:A:181:ALA:CA   | 2.10                     | 0.78              |
| 1:A:384:LEU:HD13 | 1:A:441:TYR:CE2  | 2.19                     | 0.78              |
| 2:B:291:TYR:CD2  | 2:B:294:VAL:CB   | 2.66                     | 0.78              |
| 2:B:350:THR:HB   | 2:B:352:ASN:HD21 | 1.45                     | 0.78              |
| 2:B:515:PHE:CE2  | 2:B:529:VAL:HG11 | 2.19                     | 0.78              |
| 3:M:244:VAL:CB   | 3:M:472:TYR:CE2  | 2.66                     | 0.78              |
| 3:M:354:ASP:HB2  | 3:M:440:ILE:HD12 | 1.63                     | 0.78              |
| 1:A:141:VAL:CG1  | 4:S:159:ALA:N    | 2.47                     | 0.78              |
| 2:B:20:ARG:NH1   | 2:B:35:TYR:CE1   | 2.51                     | 0.78              |
| 2:B:396:ILE:CD1  | 2:B:432:ALA:HB2  | 2.14                     | 0.78              |
| 2:B:409:LYS:O    | 2:B:413:LYS:HG3  | 1.83                     | 0.78              |
| 2:B:566:ALA:C    | 2:B:574:ASN:HB3  | 1.86                     | 0.78              |
| 3:M:9:ASP:O      | 3:M:75:TRP:CD1   | 2.37                     | 0.78              |
| 3:M:228:LYS:NZ   | 3:M:326:HIS:HA   | 1.98                     | 0.78              |
| 3:M:403:THR:HG23 | 3:M:407:THR:OG1  | 1.82                     | 0.78              |
| 1:A:429:VAL:HG11 | 1:A:473:ILE:HD11 | 1.64                     | 0.78              |
| 1:A:634:ASN:OD1  | 2:B:556:LEU:N    | 2.10                     | 0.78              |
| 2:B:104:TYR:O    | 2:B:107:ARG:N    | 2.16                     | 0.78              |
| 2:B:144:ASP:HA   | 2:B:179:LYS:CE   | 2.13                     | 0.78              |
| 2:B:146:LYS:O    | 2:B:147:MET:SD   | 2.42                     | 0.78              |
| 2:B:174:ALA:O    | 2:B:214:ALA:CB   | 2.32                     | 0.78              |
| 2:B:219:TYR:CG   | 2:B:226:LEU:CB   | 2.48                     | 0.78              |
| 2:B:336:ASN:ND2  | 2:B:338:LYS:HB2  | 1.98                     | 0.78              |
| 2:B:374:PHE:CE2  | 2:B:398:ILE:HG21 | 2.18                     | 0.78              |
| 2:B:437:SER:O    | 2:B:478:LEU:HD23 | 1.83                     | 0.78              |
| 2:B:509:ALA:HB1  | 2:B:547:GLN:HG3  | 1.47                     | 0.78              |
| 3:M:45:SER:CA    | 3:M:47:SER:N     | 2.47                     | 0.78              |
| 3:M:360:LEU:CD2  | 3:M:362:PHE:CZ   | 2.66                     | 0.78              |
| 4:S:8:PHE:CG     | 4:S:36:TYR:HE2   | 2.01                     | 0.78              |
| 1:A:182:ILE:HG21 | 1:A:218:ALA:HA   | 1.66                     | 0.78              |
| 1:A:244:LEU:HD21 | 1:A:277:LYS:O    | 1.83                     | 0.78              |
| 1:A:333:ILE:O    | 1:A:337:LEU:HG   | 1.84                     | 0.78              |
| 2:B:37:TYR:HE2   | 2:B:38:TYR:CE1   | 1.97                     | 0.78              |
| 2:B:178:ILE:HG21 | 2:B:214:ALA:C    | 2.04                     | 0.78              |
| 2:B:275:ARG:HG3  | 2:B:291:TYR:HD2  | 1.37                     | 0.78              |
| 3:M:379:LEU:HD22 | 3:M:386:PHE:CB   | 2.13                     | 0.78              |
| 4:S:34:GLN:CB    | 4:S:58:LEU:HD11  | 2.14                     | 0.78              |
| 1:A:90:HIS:O     | 1:A:94:VAL:HG23  | 1.83                     | 0.78              |

*Continued on next page...*

*Continued from previous page...*

| Atom-1           | Atom-2           | Interatomic distance (Å) | Clash overlap (Å) |
|------------------|------------------|--------------------------|-------------------|
| 1:A:408:ILE:HG22 | 4:S:65:ASN:CA    | 2.13                     | 0.78              |
| 1:A:631:SER:CB   | 2:B:557:SER:HB2  | 2.10                     | 0.78              |
| 2:B:472:VAL:CG1  | 2:B:510:GLY:C    | 2.51                     | 0.78              |
| 2:B:500:GLN:OE1  | 2:B:503:LEU:HD21 | 1.83                     | 0.78              |
| 3:M:101:LEU:CA   | 3:M:109:LEU:CD1  | 2.55                     | 0.78              |
| 2:B:178:ILE:CG1  | 2:B:214:ALA:CB   | 2.61                     | 0.77              |
| 2:B:223:LEU:HD23 | 2:B:255:TYR:HE1  | 1.47                     | 0.77              |
| 2:B:230:PHE:HD2  | 2:B:298:ASP:HB3  | 1.48                     | 0.77              |
| 2:B:475:ILE:CG2  | 2:B:514:LEU:HD21 | 2.13                     | 0.77              |
| 3:M:283:PHE:CZ   | 3:M:289:THR:CB   | 2.62                     | 0.77              |
| 2:B:20:ARG:HG3   | 2:B:21:GLU:N     | 1.99                     | 0.77              |
| 2:B:170:ARG:HA   | 2:B:199:LEU:HD23 | 1.64                     | 0.77              |
| 2:B:252:LEU:HB2  | 2:B:302:PHE:CE2  | 2.19                     | 0.77              |
| 2:B:278:PRO:CB   | 2:B:288:TYR:C    | 2.44                     | 0.77              |
| 2:B:331:PRO:HB3  | 2:B:369:LEU:HD11 | 1.64                     | 0.77              |
| 2:B:513:TRP:O    | 2:B:551:LEU:HD22 | 1.83                     | 0.77              |
| 3:M:224:VAL:N    | 3:M:479:PHE:CD1  | 2.53                     | 0.77              |
| 3:M:380:ARG:HH11 | 3:M:410:VAL:HG11 | 1.47                     | 0.77              |
| 4:S:16:LEU:CD2   | 4:S:128:LEU:HD23 | 2.14                     | 0.77              |
| 1:A:139:ASP:C    | 1:A:177:ILE:HD11 | 2.04                     | 0.77              |
| 1:A:140:VAL:HG22 | 1:A:177:ILE:CG1  | 2.14                     | 0.77              |
| 1:A:323:CYS:SG   | 1:A:334:SER:HB2  | 2.25                     | 0.77              |
| 1:A:401:VAL:CG2  | 1:A:418:ILE:N    | 2.47                     | 0.77              |
| 2:B:353:GLN:HE22 | 3:M:47:SER:HB3   | 1.42                     | 0.77              |
| 2:B:380:LYS:NZ   | 3:M:236:LEU:CG   | 2.47                     | 0.77              |
| 2:B:537:PHE:HE2  | 2:B:598:LEU:O    | 1.68                     | 0.77              |
| 3:M:290:PHE:CZ   | 3:M:297:PHE:CE2  | 2.71                     | 0.77              |
| 4:S:109:LEU:HD12 | 4:S:113:PHE:HD1  | 0.92                     | 0.77              |
| 1:A:256:LEU:O    | 1:A:260:PHE:CD1  | 2.37                     | 0.77              |
| 1:A:498:LEU:HB3  | 1:A:504:ILE:HG13 | 1.66                     | 0.77              |
| 2:B:170:ARG:HH12 | 2:B:198:GLU:HG2  | 0.69                     | 0.77              |
| 2:B:364:HIS:ND1  | 2:B:397:GLN:HB3  | 2.00                     | 0.77              |
| 3:M:228:LYS:HZ2  | 3:M:326:HIS:HA   | 1.50                     | 0.77              |
| 3:M:360:LEU:HD13 | 3:M:433:VAL:HB   | 1.66                     | 0.77              |
| 4:S:53:THR:CB    | 4:S:69:ASN:CA    | 2.54                     | 0.77              |
| 4:S:108:SER:OG   | 4:S:149:ILE:HG21 | 1.83                     | 0.77              |
| 1:A:147:LEU:CD1  | 1:A:166:LEU:CD2  | 2.62                     | 0.77              |
| 1:A:176:TYR:HB2  | 4:S:155:GLU:CG   | 2.09                     | 0.77              |
| 1:A:275:LEU:CD2  | 1:A:311:THR:OG1  | 2.28                     | 0.77              |
| 1:A:304:LEU:HD22 | 1:A:344:ILE:HG21 | 1.66                     | 0.77              |
| 2:B:123:LEU:HD22 | 2:B:138:ALA:C    | 2.04                     | 0.77              |

*Continued on next page...*

*Continued from previous page...*

| Atom-1           | Atom-2           | Interatomic distance (Å) | Clash overlap (Å) |
|------------------|------------------|--------------------------|-------------------|
| 2:B:219:TYR:HB3  | 2:B:255:TYR:CD1  | 2.17                     | 0.77              |
| 2:B:340:ILE:HG13 | 2:B:373:LEU:CD2  | 2.13                     | 0.77              |
| 2:B:479:VAL:HG21 | 2:B:486:HIS:CD2  | 2.20                     | 0.77              |
| 2:B:530:LEU:CD2  | 2:B:591:MET:HB3  | 2.14                     | 0.77              |
| 2:B:562:ASN:O    | 2:B:580:TYR:O    | 2.03                     | 0.77              |
| 3:M:101:LEU:CD1  | 3:M:106:LYS:HA   | 2.14                     | 0.77              |
| 3:M:304:VAL:HG11 | 3:M:445:SER:HA   | 1.65                     | 0.77              |
| 3:M:428:VAL:O    | 3:M:429:ASP:C    | 2.19                     | 0.77              |
| 1:A:142:LYS:HA   | 4:S:159:ALA:CB   | 2.13                     | 0.77              |
| 1:A:401:VAL:CB   | 1:A:419:ILE:HD12 | 2.14                     | 0.77              |
| 2:B:63:MET:HE1   | 2:B:104:TYR:HB2  | 1.66                     | 0.77              |
| 2:B:127:LEU:CD1  | 2:B:157:THR:CB   | 2.58                     | 0.77              |
| 2:B:284:ASN:CG   | 2:B:285:GLU:HG3  | 2.03                     | 0.77              |
| 2:B:437:SER:O    | 2:B:478:LEU:HD21 | 1.81                     | 0.77              |
| 2:B:545:ARG:HB2  | 2:B:602:ASP:OD2  | 1.84                     | 0.77              |
| 2:B:562:ASN:CB   | 2:B:580:TYR:CB   | 2.62                     | 0.77              |
| 3:M:69:ILE:CG1   | 3:M:90:PHE:CZ    | 2.67                     | 0.77              |
| 3:M:99:ILE:H     | 3:M:99:ILE:HD12  | 1.48                     | 0.77              |
| 3:M:284:SER:O    | 3:M:285:PRO:C    | 2.09                     | 0.77              |
| 3:M:302:TYR:CE2  | 3:M:445:SER:HB2  | 2.19                     | 0.77              |
| 1:A:401:VAL:HB   | 1:A:419:ILE:CD1  | 2.14                     | 0.77              |
| 1:A:460:LEU:O    | 1:A:463:ASP:N    | 2.16                     | 0.77              |
| 2:B:2:VAL:HG11   | 2:B:6:HIS:CE1    | 2.17                     | 0.77              |
| 2:B:106:LEU:HD13 | 2:B:144:ASP:CA   | 2.14                     | 0.77              |
| 3:M:243:ILE:N    | 3:M:474:THR:CG2  | 2.35                     | 0.77              |
| 3:M:256:VAL:HG22 | 3:M:452:ILE:CG2  | 2.15                     | 0.77              |
| 3:M:257:ALA:HB1  | 3:M:287:ASN:HD21 | 1.50                     | 0.77              |
| 4:S:75:ILE:HG22  | 4:S:86:THR:HG23  | 1.67                     | 0.77              |
| 1:A:244:LEU:HG   | 1:A:277:LYS:HG3  | 1.65                     | 0.77              |
| 1:A:384:LEU:HD13 | 1:A:435:ILE:HG22 | 1.67                     | 0.77              |
| 2:B:139:LEU:HD23 | 2:B:173:VAL:N    | 2.00                     | 0.77              |
| 2:B:513:TRP:HB2  | 2:B:551:LEU:HD11 | 1.65                     | 0.77              |
| 2:B:563:PHE:CE1  | 2:B:588:ILE:HD12 | 2.19                     | 0.77              |
| 3:M:235:LEU:CD1  | 3:M:306:LEU:HB3  | 2.14                     | 0.77              |
| 3:M:348:LYS:HG3  | 3:M:405:THR:CG2  | 2.13                     | 0.77              |
| 1:A:178:ARG:HB3  | 1:A:214:VAL:HG13 | 1.67                     | 0.77              |
| 1:A:353:ASP:OD1  | 1:A:378:ILE:HD13 | 1.84                     | 0.77              |
| 1:A:636:TYR:H    | 2:B:554:LYS:CD   | 1.97                     | 0.77              |
| 2:B:191:GLU:C    | 2:B:193:LEU:N    | 2.37                     | 0.77              |
| 2:B:292:GLU:HG3  | 2:B:296:ASP:HB2  | 1.46                     | 0.77              |
| 3:M:223:HIS:CE1  | 3:M:476:THR:H    | 2.03                     | 0.77              |

*Continued on next page...*



*Continued from previous page...*

| Atom-1           | Atom-2           | Interatomic distance (Å) | Clash overlap (Å) |
|------------------|------------------|--------------------------|-------------------|
| 3:M:235:LEU:HD11 | 3:M:306:LEU:CB   | 2.14                     | 0.77              |
| 3:M:340:LEU:HG   | 3:M:411:LEU:HB3  | 1.66                     | 0.77              |
| 3:M:379:LEU:CD2  | 3:M:397:TRP:HE1  | 1.98                     | 0.77              |
| 2:B:86:VAL:CG1   | 2:B:101:ILE:CG2  | 2.57                     | 0.77              |
| 2:B:105:LEU:HB3  | 2:B:145:MET:HE1  | 1.65                     | 0.77              |
| 2:B:124:GLN:HB2  | 2:B:153:ILE:HG23 | 1.67                     | 0.77              |
| 2:B:424:PHE:HD2  | 2:B:428:VAL:HG11 | 1.48                     | 0.77              |
| 3:M:4:SER:O      | 3:M:78:ALA:C     | 2.23                     | 0.77              |
| 4:S:57:LEU:HA    | 4:S:60:SER:HB2   | 1.67                     | 0.77              |
| 2:B:120:ILE:CD1  | 2:B:142:LEU:CD2  | 2.63                     | 0.76              |
| 3:M:3:LEU:HB2    | 3:M:20:LEU:CD1   | 2.13                     | 0.76              |
| 3:M:246:VAL:O    | 3:M:297:PHE:CE2  | 2.37                     | 0.76              |
| 4:S:47:GLN:OE1   | 4:S:79:ASN:N     | 2.18                     | 0.76              |
| 4:S:87:PHE:CE1   | 4:S:102:ILE:HG23 | 2.20                     | 0.76              |
| 4:S:89:VAL:CG1   | 4:S:98:ILE:HG21  | 2.15                     | 0.76              |
| 4:S:112:CYS:SG   | 4:S:153:VAL:HG21 | 2.25                     | 0.76              |
| 1:A:79:MET:HG2   | 1:A:112:GLN:OE1  | 1.84                     | 0.76              |
| 1:A:255:ARG:O    | 1:A:258:LYS:N    | 2.18                     | 0.76              |
| 1:A:288:THR:OG1  | 1:A:291:ILE:CB   | 2.28                     | 0.76              |
| 1:A:316:LEU:HD11 | 1:A:341:ILE:HG21 | 1.67                     | 0.76              |
| 2:B:144:ASP:HA   | 2:B:179:LYS:CD   | 2.16                     | 0.76              |
| 2:B:334:MET:HE2  | 2:B:339:PHE:CE1  | 2.20                     | 0.76              |
| 3:M:215:TYR:CE1  | 3:M:468:LYS:HA   | 2.18                     | 0.76              |
| 3:M:253:ASN:OD1  | 3:M:292:PRO:CG   | 2.33                     | 0.76              |
| 1:A:252:ILE:HA   | 4:S:144:THR:HG1  | 1.49                     | 0.76              |
| 2:B:90:ILE:HD11  | 2:B:102:HIS:CD2  | 2.21                     | 0.76              |
| 2:B:184:GLY:O    | 2:B:188:TYR:HB2  | 1.84                     | 0.76              |
| 2:B:197:LYS:C    | 2:B:199:LEU:N    | 2.36                     | 0.76              |
| 2:B:227:HIS:C    | 2:B:229:HIS:N    | 2.21                     | 0.76              |
| 2:B:243:TRP:CZ2  | 3:M:94:GLU:C     | 2.55                     | 0.76              |
| 2:B:279:LEU:CG   | 2:B:288:TYR:CD1  | 2.64                     | 0.76              |
| 2:B:526:CYS:N    | 2:B:527:PRO:CD   | 2.48                     | 0.76              |
| 2:B:549:LEU:HD21 | 2:B:610:ARG:C    | 2.01                     | 0.76              |
| 4:S:75:ILE:HG22  | 4:S:77:TYR:CE1   | 2.21                     | 0.76              |
| 1:A:102:GLN:HE21 | 4:S:165:SER:N    | 1.83                     | 0.76              |
| 1:A:594:PHE:CE2  | 2:B:474:VAL:HG22 | 2.20                     | 0.76              |
| 2:B:29:LYS:HE2   | 2:B:30:LEU:CA    | 2.16                     | 0.76              |
| 2:B:196:LEU:HB3  | 2:B:215:TYR:CZ   | 2.20                     | 0.76              |
| 2:B:458:MET:SD   | 2:B:471:TYR:CB   | 2.72                     | 0.76              |
| 4:S:53:THR:HG23  | 4:S:67:GLU:C     | 1.98                     | 0.76              |
| 1:A:63:ASP:O     | 4:S:165:SER:OG   | 2.01                     | 0.76              |

*Continued on next page...*

*Continued from previous page...*

| Atom-1           | Atom-2           | Interatomic distance (Å) | Clash overlap (Å) |
|------------------|------------------|--------------------------|-------------------|
| 1:A:67:LYS:HB3   | 1:A:94:VAL:CG2   | 2.14                     | 0.76              |
| 1:A:103:LYS:HB3  | 1:A:107:TYR:HE1  | 1.46                     | 0.76              |
| 1:A:105:VAL:CA   | 4:S:167:ILE:HD13 | 2.16                     | 0.76              |
| 1:A:183:THR:OG1  | 4:S:142:ILE:HD11 | 1.83                     | 0.76              |
| 1:A:215:VAL:O    | 1:A:216:SER:C    | 2.18                     | 0.76              |
| 2:B:5:ILE:HA     | 2:B:8:ILE:HD12   | 1.66                     | 0.76              |
| 2:B:6:HIS:ND1    | 3:M:25:PRO:HB3   | 2.00                     | 0.76              |
| 2:B:93:ASN:HA    | 2:B:134:LEU:CD1  | 2.15                     | 0.76              |
| 2:B:136:CYS:HA   | 2:B:172:GLU:HB2  | 1.67                     | 0.76              |
| 2:B:182:ARG:NH1  | 2:B:217:GLU:OE1  | 2.18                     | 0.76              |
| 2:B:232:ARG:HG3  | 2:B:236:ILE:HG13 | 1.65                     | 0.76              |
| 2:B:261:PRO:HG2  | 2:B:292:GLU:CA   | 2.15                     | 0.76              |
| 2:B:334:MET:HA   | 2:B:334:MET:CE   | 2.14                     | 0.76              |
| 4:S:17:VAL:HG13  | 4:S:19:PHE:CE1   | 2.21                     | 0.76              |
| 4:S:53:THR:HG21  | 4:S:68:VAL:N     | 2.00                     | 0.76              |
| 1:A:140:VAL:C    | 4:S:155:GLU:HB3  | 2.05                     | 0.76              |
| 1:A:516:ILE:CD1  | 1:A:551:LEU:HD13 | 2.15                     | 0.76              |
| 2:B:105:LEU:CB   | 2:B:145:MET:HE3  | 2.11                     | 0.76              |
| 2:B:215:TYR:CE2  | 2:B:229:HIS:CB   | 2.69                     | 0.76              |
| 3:M:348:LYS:O    | 3:M:405:THR:HG23 | 1.85                     | 0.76              |
| 4:S:131:VAL:HG21 | 4:S:153:VAL:CG2  | 2.14                     | 0.76              |
| 1:A:101:GLN:O    | 4:S:167:ILE:CG1  | 2.31                     | 0.76              |
| 1:A:370:LYS:O    | 1:A:374:LEU:HD13 | 1.86                     | 0.76              |
| 2:B:47:LEU:HB3   | 2:B:66:ILE:HG12  | 1.67                     | 0.76              |
| 2:B:172:GLU:O    | 2:B:173:VAL:C    | 2.15                     | 0.76              |
| 2:B:212:VAL:C    | 2:B:214:ALA:N    | 2.35                     | 0.76              |
| 2:B:260:LEU:HB3  | 2:B:291:TYR:CZ   | 2.12                     | 0.76              |
| 2:B:479:VAL:CG2  | 2:B:486:HIS:NE2  | 2.48                     | 0.76              |
| 3:M:65:TYR:CD2   | 3:M:86:PRO:HA    | 2.20                     | 0.76              |
| 3:M:373:ALA:HB3  | 3:M:418:GLU:O    | 1.86                     | 0.76              |
| 3:M:443:SER:HB3  | 3:M:447:ILE:N    | 2.00                     | 0.76              |
| 4:S:53:THR:CB    | 4:S:69:ASN:HB2   | 2.16                     | 0.76              |
| 4:S:69:ASN:O     | 4:S:73:ILE:O     | 2.04                     | 0.76              |
| 4:S:75:ILE:CG2   | 4:S:86:THR:CG2   | 2.64                     | 0.76              |
| 1:A:99:LYS:HZ3   | 4:S:164:ASP:CB   | 1.97                     | 0.76              |
| 1:A:606:PHE:CG   | 1:A:629:LEU:HG   | 2.20                     | 0.76              |
| 2:B:83:PHE:O     | 2:B:87:VAL:HG23  | 1.85                     | 0.76              |
| 2:B:178:ILE:HG23 | 2:B:217:GLU:CB   | 2.15                     | 0.76              |
| 2:B:334:MET:HB2  | 2:B:369:LEU:HD23 | 1.67                     | 0.76              |
| 3:M:214:LEU:O    | 3:M:467:TYR:HB3  | 1.85                     | 0.76              |
| 3:M:273:HIS:CB   | 3:M:298:ARG:O    | 2.32                     | 0.76              |

*Continued on next page...*

*Continued from previous page...*

| Atom-1           | Atom-2           | Interatomic distance (Å) | Clash overlap (Å) |
|------------------|------------------|--------------------------|-------------------|
| 1:A:101:GLN:HG2  | 4:S:160:ALA:HB1  | 1.66                     | 0.76              |
| 1:A:207:LEU:O    | 1:A:243:ILE:HD11 | 1.86                     | 0.76              |
| 2:B:36:THR:HA    | 2:B:39:SER:OG    | 1.84                     | 0.76              |
| 2:B:396:ILE:CG1  | 2:B:418:TYR:HE2  | 1.98                     | 0.76              |
| 3:M:101:LEU:C    | 3:M:106:LYS:HA   | 2.06                     | 0.76              |
| 3:M:223:HIS:CD2  | 3:M:478:ASN:HB2  | 2.20                     | 0.76              |
| 3:M:224:VAL:O    | 3:M:479:PHE:CA   | 2.34                     | 0.76              |
| 4:S:85:PHE:CE2   | 4:S:109:LEU:HD23 | 2.21                     | 0.76              |
| 1:A:207:LEU:CD2  | 1:A:239:LEU:CB   | 2.58                     | 0.76              |
| 1:A:244:LEU:HD11 | 1:A:281:LEU:HD11 | 1.68                     | 0.76              |
| 1:A:623:MET:O    | 2:B:617:LEU:CD2  | 2.34                     | 0.76              |
| 1:A:627:GLU:HG2  | 2:B:617:LEU:HA   | 1.67                     | 0.76              |
| 2:B:549:LEU:HD21 | 2:B:611:ALA:H    | 0.94                     | 0.76              |
| 2:B:559:ASP:O    | 2:B:562:ASN:CA   | 2.33                     | 0.76              |
| 2:B:563:PHE:O    | 2:B:564:LYS:O    | 2.03                     | 0.76              |
| 3:M:217:ASP:OD1  | 3:M:440:ILE:HG23 | 1.85                     | 0.76              |
| 3:M:342:LEU:HD12 | 3:M:411:LEU:HB3  | 1.68                     | 0.76              |
| 1:A:74:LEU:HD22  | 1:A:87:CYS:CB    | 2.14                     | 0.75              |
| 1:A:101:GLN:N    | 4:S:162:SER:N    | 2.34                     | 0.75              |
| 1:A:179:LYS:NZ   | 4:S:143:GLU:HB2  | 2.00                     | 0.75              |
| 1:A:254:ILE:HG13 | 1:A:290:VAL:HG22 | 1.68                     | 0.75              |
| 1:A:264:SER:HB3  | 1:A:271:ARG:HG3  | 1.68                     | 0.75              |
| 1:A:421:PRO:CG   | 1:A:424:TYR:CE1  | 2.66                     | 0.75              |
| 1:A:481:MET:HE2  | 1:A:518:CYS:HB3  | 1.68                     | 0.75              |
| 1:A:595:GLU:HG3  | 2:B:469:ASP:HB3  | 0.75                     | 0.75              |
| 2:B:67:ILE:HD13  | 2:B:103:LEU:CB   | 2.15                     | 0.75              |
| 2:B:178:ILE:HD13 | 2:B:218:CYS:CB   | 2.15                     | 0.75              |
| 2:B:433:VAL:CB   | 2:B:474:VAL:HG21 | 2.15                     | 0.75              |
| 2:B:500:GLN:HB3  | 2:B:503:LEU:HG   | 1.68                     | 0.75              |
| 2:B:589:SER:OG   | 2:B:618:PHE:CE2  | 2.39                     | 0.75              |
| 3:M:60:LEU:HD22  | 3:M:62:VAL:HG22  | 1.67                     | 0.75              |
| 3:M:99:ILE:HG12  | 3:M:128:CYS:SG   | 2.27                     | 0.75              |
| 3:M:222:PHE:CB   | 3:M:479:PHE:HZ   | 1.93                     | 0.75              |
| 3:M:224:VAL:C    | 3:M:479:PHE:HA   | 2.06                     | 0.75              |
| 3:M:245:ASP:CB   | 3:M:472:TYR:HD1  | 1.95                     | 0.75              |
| 3:M:306:LEU:HD22 | 3:M:317:MET:HE3  | 1.68                     | 0.75              |
| 3:M:383:HIS:HB2  | 3:M:403:THR:OG1  | 1.85                     | 0.75              |
| 1:A:103:LYS:CG   | 4:S:163:THR:CG2  | 2.57                     | 0.75              |
| 1:A:461:CYS:CB   | 1:A:469:LEU:HD23 | 2.17                     | 0.75              |
| 2:B:29:LYS:O     | 2:B:32:GLU:HG3   | 1.78                     | 0.75              |
| 2:B:154:ILE:CD1  | 2:B:180:LEU:CB   | 2.64                     | 0.75              |

*Continued on next page...*

*Continued from previous page...*

| Atom-1           | Atom-2           | Interatomic distance (Å) | Clash overlap (Å) |
|------------------|------------------|--------------------------|-------------------|
| 2:B:178:ILE:CB   | 2:B:214:ALA:HB1  | 2.16                     | 0.75              |
| 2:B:231:ARG:HG2  | 2:B:298:ASP:OD1  | 1.84                     | 0.75              |
| 2:B:556:LEU:HD23 | 2:B:588:ILE:CD1  | 2.17                     | 0.75              |
| 2:B:596:LEU:HD22 | 2:B:615:SER:OG   | 1.84                     | 0.75              |
| 3:M:101:LEU:CG   | 3:M:106:LYS:O    | 2.35                     | 0.75              |
| 3:M:104:PHE:HZ   | 3:M:113:LYS:HZ2  | 0.77                     | 0.75              |
| 3:M:320:ILE:HG13 | 3:M:347:PHE:CD1  | 2.20                     | 0.75              |
| 3:M:379:LEU:HD23 | 3:M:397:TRP:NE1  | 2.01                     | 0.75              |
| 4:S:54:PRO:CB    | 4:S:57:LEU:CD1   | 2.64                     | 0.75              |
| 1:A:166:LEU:HD12 | 1:A:185:LEU:CD2  | 2.04                     | 0.75              |
| 1:A:178:ARG:CZ   | 1:A:209:ASP:CG   | 2.55                     | 0.75              |
| 1:A:320:HIS:O    | 1:A:322:PHE:N    | 2.19                     | 0.75              |
| 2:B:346:THR:O    | 2:B:350:THR:N    | 2.18                     | 0.75              |
| 2:B:390:VAL:O    | 2:B:393:ILE:HB   | 1.86                     | 0.75              |
| 2:B:563:PHE:O    | 2:B:566:ALA:CA   | 2.35                     | 0.75              |
| 2:B:592:TYR:CE2  | 2:B:618:PHE:CD2  | 2.74                     | 0.75              |
| 3:M:437:TYR:HB2  | 3:M:439:TYR:CZ   | 2.21                     | 0.75              |
| 4:S:9:ASN:HD21   | 4:S:13:GLN:HG2   | 1.51                     | 0.75              |
| 4:S:47:GLN:HE22  | 4:S:79:ASN:N     | 1.84                     | 0.75              |
| 4:S:73:ILE:HG23  | 4:S:88:ILE:HG22  | 1.65                     | 0.75              |
| 1:A:178:ARG:CZ   | 1:A:209:ASP:OD2  | 2.35                     | 0.75              |
| 1:A:264:SER:CB   | 1:A:271:ARG:HG3  | 2.15                     | 0.75              |
| 2:B:108:PHE:CD2  | 2:B:115:LEU:HB2  | 2.22                     | 0.75              |
| 2:B:307:ASN:O    | 2:B:310:ILE:N    | 2.19                     | 0.75              |
| 2:B:343:LEU:HD21 | 2:B:359:LEU:O    | 1.86                     | 0.75              |
| 2:B:363:ILE:HG21 | 2:B:398:ILE:HD13 | 1.66                     | 0.75              |
| 2:B:469:ASP:OD1  | 2:B:506:ASN:HB3  | 1.86                     | 0.75              |
| 3:M:6:TYR:OH     | 3:M:17:GLN:NE2   | 2.18                     | 0.75              |
| 3:M:16:PHE:HA    | 3:M:118:TYR:CE1  | 2.22                     | 0.75              |
| 3:M:18:TYR:HE2   | 3:M:20:LEU:CD2   | 1.98                     | 0.75              |
| 4:S:131:VAL:CG2  | 4:S:153:VAL:CG2  | 2.58                     | 0.75              |
| 1:A:117:ASP:CG   | 1:A:120:ILE:HG12 | 2.07                     | 0.75              |
| 1:A:260:PHE:CG   | 1:A:274:LEU:HG   | 2.22                     | 0.75              |
| 2:B:106:LEU:HD11 | 2:B:144:ASP:CB   | 1.80                     | 0.75              |
| 2:B:267:ASP:N    | 2:B:289:PRO:CG   | 2.49                     | 0.75              |
| 3:M:374:TYR:CB   | 3:M:417:TYR:CD2  | 2.69                     | 0.75              |
| 1:A:104:ARG:HG3  | 1:A:145:ILE:CD1  | 2.15                     | 0.75              |
| 1:A:403:LEU:CD2  | 1:A:421:PRO:C    | 2.44                     | 0.75              |
| 1:A:638:LEU:O    | 2:B:486:HIS:HE1  | 1.70                     | 0.75              |
| 2:B:177:ILE:CG2  | 2:B:196:LEU:HD11 | 2.16                     | 0.75              |
| 2:B:277:CYS:C    | 2:B:288:TYR:HB3  | 2.04                     | 0.75              |

*Continued on next page...*

*Continued from previous page...*

| Atom-1           | Atom-2           | Interatomic distance (Å) | Clash overlap (Å) |
|------------------|------------------|--------------------------|-------------------|
| 2:B:334:MET:CE   | 2:B:339:PHE:CE1  | 2.70                     | 0.75              |
| 3:M:221:THR:HB   | 3:M:474:THR:C    | 2.06                     | 0.75              |
| 3:M:290:PHE:CD1  | 3:M:297:PHE:CE1  | 2.75                     | 0.75              |
| 3:M:350:VAL:HG22 | 3:M:442:GLN:CD   | 2.06                     | 0.75              |
| 3:M:421:GLY:O    | 3:M:422:PRO:C    | 2.22                     | 0.75              |
| 4:S:8:PHE:CB     | 4:S:36:TYR:CZ    | 2.62                     | 0.75              |
| 1:A:322:PHE:CG   | 1:A:330:LEU:HD21 | 2.22                     | 0.75              |
| 1:A:557:LYS:CD   | 2:B:605:PHE:HB3  | 2.12                     | 0.75              |
| 2:B:118:LEU:O    | 2:B:121:ASN:N    | 2.20                     | 0.75              |
| 2:B:286:ILE:CG2  | 2:B:288:TYR:OH   | 2.34                     | 0.75              |
| 2:B:473:ASN:O    | 2:B:476:ARG:HB3  | 1.86                     | 0.75              |
| 2:B:550:VAL:CG2  | 2:B:610:ARG:HD3  | 2.13                     | 0.75              |
| 3:M:121:ILE:CG2  | 3:M:125:PHE:CE1  | 2.70                     | 0.75              |
| 3:M:219:LEU:O    | 3:M:474:THR:HG23 | 1.86                     | 0.75              |
| 3:M:222:PHE:CD1  | 3:M:439:TYR:HE1  | 2.04                     | 0.75              |
| 3:M:241:HIS:HB2  | 3:M:476:THR:HG23 | 1.67                     | 0.75              |
| 3:M:454:ILE:CG2  | 3:M:464:THR:CG2  | 2.53                     | 0.75              |
| 4:S:16:LEU:HD23  | 4:S:128:LEU:CD2  | 2.16                     | 0.75              |
| 1:A:304:LEU:HD12 | 1:A:312:ALA:HB2  | 1.68                     | 0.75              |
| 2:B:602:ASP:OD1  | 2:B:603:ASP:N    | 2.19                     | 0.75              |
| 3:M:258:VAL:HG13 | 3:M:452:ILE:CG1  | 2.16                     | 0.75              |
| 3:M:290:PHE:CZ   | 3:M:297:PHE:CZ   | 2.74                     | 0.75              |
| 3:M:437:TYR:N    | 3:M:437:TYR:CD1  | 2.53                     | 0.75              |
| 1:A:581:LEU:HD23 | 1:A:607:LEU:HD21 | 1.69                     | 0.75              |
| 1:A:633:PHE:HD2  | 2:B:551:LEU:CA   | 1.71                     | 0.75              |
| 1:A:636:TYR:CG   | 2:B:554:LYS:NZ   | 2.55                     | 0.75              |
| 2:B:60:ARG:HD2   | 2:B:96:LYS:CG    | 2.16                     | 0.75              |
| 2:B:171:GLY:HA3  | 2:B:207:VAL:CA   | 2.17                     | 0.75              |
| 2:B:189:HIS:NE2  | 2:B:225:LEU:HD23 | 2.00                     | 0.75              |
| 2:B:200:MET:CG   | 2:B:232:ARG:HB3  | 2.13                     | 0.75              |
| 2:B:215:TYR:CB   | 2:B:226:LEU:CD1  | 2.63                     | 0.75              |
| 2:B:310:ILE:HG12 | 2:B:318:ILE:HA   | 1.69                     | 0.75              |
| 2:B:319:LEU:HD12 | 2:B:358:MET:CG   | 1.79                     | 0.75              |
| 2:B:328:LEU:HB2  | 2:B:333:GLN:HE22 | 1.52                     | 0.75              |
| 2:B:346:THR:HG23 | 2:B:350:THR:HG23 | 1.66                     | 0.75              |
| 2:B:444:THR:O    | 2:B:445:SER:C    | 2.15                     | 0.75              |
| 2:B:597:TYR:O    | 2:B:601:TYR:CE1  | 2.39                     | 0.75              |
| 3:M:52:ASP:HA    | 3:M:67:SER:CA    | 2.17                     | 0.75              |
| 1:A:129:LYS:HA   | 1:A:165:ASP:OD2  | 1.86                     | 0.74              |
| 2:B:219:TYR:CE1  | 2:B:226:LEU:HD12 | 2.19                     | 0.74              |
| 2:B:225:LEU:HD13 | 2:B:283:TYR:CZ   | 2.15                     | 0.74              |

*Continued on next page...*

*Continued from previous page...*

| Atom-1           | Atom-2           | Interatomic distance (Å) | Clash overlap (Å) |
|------------------|------------------|--------------------------|-------------------|
| 2:B:596:LEU:HD13 | 2:B:611:ALA:O    | 1.87                     | 0.74              |
| 3:M:67:SER:CB    | 3:M:90:PHE:CD1   | 2.61                     | 0.74              |
| 3:M:101:LEU:CD1  | 3:M:109:LEU:CD1  | 2.65                     | 0.74              |
| 3:M:342:LEU:HD11 | 3:M:411:LEU:HD23 | 1.65                     | 0.74              |
| 1:A:291:ILE:HG21 | 1:A:318:ARG:HB3  | 1.63                     | 0.74              |
| 1:A:372:ILE:CG2  | 1:A:427:LYS:HE3  | 2.17                     | 0.74              |
| 1:A:556:VAL:HG11 | 2:B:610:ARG:NH2  | 2.02                     | 0.74              |
| 2:B:219:TYR:CG   | 2:B:223:LEU:HD23 | 2.20                     | 0.74              |
| 2:B:299:LEU:O    | 2:B:302:PHE:HB3  | 1.87                     | 0.74              |
| 2:B:337:THR:HA   | 2:B:373:LEU:HD22 | 1.63                     | 0.74              |
| 2:B:500:GLN:CB   | 2:B:503:LEU:HG   | 2.17                     | 0.74              |
| 4:S:54:PRO:HB2   | 4:S:57:LEU:HD11  | 1.70                     | 0.74              |
| 1:A:99:LYS:CD    | 4:S:164:ASP:H    | 1.94                     | 0.74              |
| 1:A:186:PHE:CD1  | 1:A:224:GLU:HB3  | 2.22                     | 0.74              |
| 1:A:609:LEU:CD2  | 1:A:628:VAL:HG11 | 2.17                     | 0.74              |
| 2:B:37:TYR:CE2   | 2:B:42:ILE:HA    | 2.22                     | 0.74              |
| 2:B:37:TYR:O     | 2:B:39:SER:N     | 2.20                     | 0.74              |
| 2:B:63:MET:HE2   | 2:B:104:TYR:HB2  | 1.69                     | 0.74              |
| 2:B:278:PRO:N    | 2:B:292:GLU:CD   | 2.37                     | 0.74              |
| 2:B:546:CYS:CB   | 2:B:607:ILE:CD1  | 2.42                     | 0.74              |
| 3:M:18:TYR:HD1   | 3:M:122:SER:CA   | 1.80                     | 0.74              |
| 3:M:449:VAL:HG11 | 3:M:452:ILE:HD11 | 0.75                     | 0.74              |
| 1:A:163:ALA:CA   | 1:A:199:ASN:HD21 | 2.00                     | 0.74              |
| 1:A:287:ALA:HB3  | 1:A:288:THR:C    | 2.06                     | 0.74              |
| 2:B:38:TYR:CD2   | 2:B:65:ARG:CD    | 2.33                     | 0.74              |
| 2:B:70:MET:HB2   | 2:B:104:TYR:CE1  | 2.22                     | 0.74              |
| 2:B:143:SER:CA   | 2:B:179:LYS:HB2  | 2.16                     | 0.74              |
| 2:B:599:ALA:C    | 2:B:601:TYR:N    | 2.39                     | 0.74              |
| 3:M:443:SER:CA   | 3:M:447:ILE:HG13 | 2.18                     | 0.74              |
| 1:A:397:ASP:O    | 1:A:418:ILE:CG1  | 2.35                     | 0.74              |
| 2:B:310:ILE:O    | 2:B:311:TYR:C    | 2.13                     | 0.74              |
| 4:S:17:VAL:HG22  | 4:S:19:PHE:CE2   | 2.21                     | 0.74              |
| 4:S:85:PHE:CD1   | 4:S:106:VAL:HG22 | 2.21                     | 0.74              |
| 1:A:183:THR:OG1  | 4:S:142:ILE:HD13 | 1.86                     | 0.74              |
| 1:A:220:SER:HB3  | 4:S:142:ILE:HG22 | 0.75                     | 0.74              |
| 2:B:378:THR:CG2  | 2:B:379:LYS:H    | 1.99                     | 0.74              |
| 2:B:390:VAL:HA   | 2:B:393:ILE:HD12 | 1.69                     | 0.74              |
| 2:B:602:ASP:O    | 2:B:608:ARG:CZ   | 2.36                     | 0.74              |
| 3:M:67:SER:OG    | 3:M:90:PHE:CB    | 2.35                     | 0.74              |
| 3:M:95:THR:O     | 3:M:99:ILE:HD12  | 1.87                     | 0.74              |
| 1:A:80:TYR:HB2   | 1:A:82:PHE:CE2   | 2.22                     | 0.74              |

*Continued on next page...*

*Continued from previous page...*

| Atom-1           | Atom-2           | Interatomic distance (Å) | Clash overlap (Å) |
|------------------|------------------|--------------------------|-------------------|
| 1:A:110:ALA:O    | 1:A:111:SER:C    | 2.14                     | 0.74              |
| 1:A:142:LYS:CA   | 4:S:159:ALA:HB1  | 2.17                     | 0.74              |
| 1:A:179:LYS:NZ   | 4:S:149:ILE:HG12 | 2.01                     | 0.74              |
| 1:A:212:ILE:CG2  | 1:A:247:ILE:HD13 | 2.17                     | 0.74              |
| 1:A:398:GLU:O    | 1:A:420:ILE:CG1  | 2.34                     | 0.74              |
| 2:B:178:ILE:HG13 | 2:B:214:ALA:CB   | 2.18                     | 0.74              |
| 2:B:197:LYS:C    | 2:B:199:LEU:H    | 1.91                     | 0.74              |
| 3:M:222:PHE:CE1  | 3:M:240:ILE:CG2  | 2.70                     | 0.74              |
| 3:M:360:LEU:HD21 | 3:M:362:PHE:CE2  | 2.23                     | 0.74              |
| 1:A:304:LEU:HA   | 1:A:308:ASP:HB2  | 1.67                     | 0.74              |
| 1:A:540:ILE:CG1  | 1:A:551:LEU:HD23 | 2.16                     | 0.74              |
| 2:B:20:ARG:CG    | 2:B:21:GLU:N     | 2.49                     | 0.74              |
| 2:B:225:LEU:CD1  | 2:B:283:TYR:HE1  | 1.83                     | 0.74              |
| 1:A:105:VAL:CG2  | 4:S:167:ILE:CB   | 2.66                     | 0.74              |
| 1:A:175:PRO:HB3  | 1:A:211:ASP:CG   | 2.07                     | 0.74              |
| 1:A:506:LYS:HE2  | 3:M:58:ARG:CA    | 2.18                     | 0.74              |
| 1:A:634:ASN:ND2  | 2:B:554:LYS:HB3  | 1.79                     | 0.74              |
| 2:B:175:LEU:CD2  | 2:B:210:CYS:CA   | 2.65                     | 0.74              |
| 2:B:277:CYS:CB   | 2:B:292:GLU:HG3  | 2.16                     | 0.74              |
| 3:M:17:GLN:O     | 3:M:118:TYR:OH   | 2.02                     | 0.74              |
| 3:M:241:HIS:C    | 3:M:474:THR:HB   | 2.06                     | 0.74              |
| 1:A:67:LYS:HB3   | 4:S:166:LYS:HA   | 1.70                     | 0.74              |
| 1:A:67:LYS:CG    | 4:S:165:SER:HG   | 2.01                     | 0.74              |
| 1:A:391:LEU:O    | 1:A:392:MET:C    | 2.17                     | 0.74              |
| 1:A:436:CYS:HB2  | 1:A:450:TYR:CE1  | 2.23                     | 0.74              |
| 1:A:606:PHE:CZ   | 2:B:550:VAL:HG11 | 2.21                     | 0.74              |
| 1:A:624:LEU:O    | 2:B:617:LEU:HD11 | 1.88                     | 0.74              |
| 2:B:490:ILE:HG23 | 2:B:515:PHE:CD2  | 2.23                     | 0.74              |
| 3:M:5:PHE:CD2    | 3:M:78:ALA:HB3   | 2.16                     | 0.74              |
| 3:M:64:LYS:HG2   | 3:M:79:SER:C     | 2.07                     | 0.74              |
| 3:M:101:LEU:CD1  | 3:M:106:LYS:CA   | 2.65                     | 0.74              |
| 1:A:213:SER:H    | 4:S:148:ARG:HD3  | 1.52                     | 0.73              |
| 1:A:383:ASN:O    | 1:A:387:ILE:HG12 | 1.88                     | 0.73              |
| 2:B:90:ILE:HG12  | 2:B:98:LYS:HE2   | 1.69                     | 0.73              |
| 2:B:139:LEU:HD21 | 2:B:173:VAL:C    | 2.08                     | 0.73              |
| 2:B:162:VAL:HG11 | 2:B:195:ILE:HA   | 1.67                     | 0.73              |
| 2:B:171:GLY:HA3  | 2:B:207:VAL:CB   | 2.18                     | 0.73              |
| 2:B:199:LEU:C    | 2:B:201:ALA:H    | 1.89                     | 0.73              |
| 2:B:497:LEU:CD2  | 2:B:533:LEU:HD22 | 2.18                     | 0.73              |
| 3:M:10:THR:HG23  | 3:M:11:LYS:HG3   | 1.70                     | 0.73              |
| 3:M:94:GLU:O     | 3:M:97:ASP:HB2   | 1.88                     | 0.73              |

*Continued on next page...*

*Continued from previous page...*

| Atom-1           | Atom-2           | Interatomic distance (Å) | Clash overlap (Å) |
|------------------|------------------|--------------------------|-------------------|
| 1:A:132:LEU:CD1  | 1:A:165:ASP:CB   | 2.65                     | 0.73              |
| 1:A:384:LEU:CD1  | 1:A:441:TYR:CE2  | 2.71                     | 0.73              |
| 1:A:450:TYR:O    | 1:A:454:ILE:HG12 | 1.88                     | 0.73              |
| 1:A:513:ARG:CD   | 1:A:550:VAL:CG2  | 2.53                     | 0.73              |
| 1:A:633:PHE:CZ   | 2:B:513:TRP:CE3  | 2.70                     | 0.73              |
| 2:B:114:ASN:O    | 2:B:117:LEU:HB2  | 1.87                     | 0.73              |
| 2:B:132:SER:HB2  | 2:B:166:SER:HB3  | 1.70                     | 0.73              |
| 2:B:430:ILE:HG23 | 2:B:470:ALA:CB   | 2.18                     | 0.73              |
| 2:B:478:LEU:O    | 2:B:480:GLN:N    | 2.21                     | 0.73              |
| 2:B:553:ALA:CB   | 2:B:614:ILE:CG2  | 2.66                     | 0.73              |
| 2:B:83:PHE:HE2   | 2:B:119:SER:HA   | 1.53                     | 0.73              |
| 2:B:141:ALA:O    | 2:B:143:SER:N    | 2.21                     | 0.73              |
| 2:B:175:LEU:CG   | 2:B:210:CYS:CB   | 2.63                     | 0.73              |
| 3:M:214:LEU:C    | 3:M:214:LEU:HD23 | 2.08                     | 0.73              |
| 3:M:217:ASP:H    | 3:M:470:ALA:CB   | 1.93                     | 0.73              |
| 3:M:222:PHE:CG   | 3:M:439:TYR:CE1  | 2.76                     | 0.73              |
| 4:S:109:LEU:CD1  | 4:S:113:PHE:HD1  | 1.70                     | 0.73              |
| 1:A:378:ILE:O    | 1:A:378:ILE:HG13 | 1.87                     | 0.73              |
| 2:B:479:VAL:HG22 | 2:B:486:HIS:CG   | 2.22                     | 0.73              |
| 2:B:513:TRP:CB   | 2:B:551:LEU:HD11 | 2.18                     | 0.73              |
| 3:M:45:SER:CB    | 3:M:51:LEU:CD1   | 2.62                     | 0.73              |
| 4:S:4:ALA:CA     | 4:S:18:LYS:O     | 2.35                     | 0.73              |
| 1:A:186:PHE:HE2  | 1:A:187:LYS:HD3  | 1.53                     | 0.73              |
| 1:A:254:ILE:HG23 | 1:A:293:GLU:CG   | 2.16                     | 0.73              |
| 2:B:108:PHE:HE2  | 2:B:115:LEU:HB2  | 1.50                     | 0.73              |
| 3:M:247:ARG:H    | 3:M:470:ALA:HB2  | 1.53                     | 0.73              |
| 3:M:443:SER:CB   | 3:M:447:ILE:N    | 2.51                     | 0.73              |
| 1:A:102:GLN:NE2  | 4:S:165:SER:N    | 2.37                     | 0.73              |
| 1:A:233:PHE:O    | 1:A:234:ILE:C    | 2.05                     | 0.73              |
| 1:A:319:LEU:O    | 1:A:320:HIS:O    | 2.07                     | 0.73              |
| 1:A:322:PHE:CD2  | 1:A:330:LEU:CD2  | 2.71                     | 0.73              |
| 1:A:516:ILE:HG12 | 1:A:551:LEU:HD13 | 1.68                     | 0.73              |
| 1:A:633:PHE:HE1  | 2:B:513:TRP:CZ3  | 1.88                     | 0.73              |
| 2:B:212:VAL:HG21 | 2:B:248:LEU:CD2  | 2.14                     | 0.73              |
| 2:B:343:LEU:O    | 2:B:347:VAL:HG23 | 1.88                     | 0.73              |
| 2:B:438:ARG:HA   | 2:B:441:GLN:HE21 | 1.52                     | 0.73              |
| 2:B:476:ARG:HA   | 2:B:514:LEU:HD13 | 1.69                     | 0.73              |
| 2:B:567:GLN:N    | 2:B:574:ASN:ND2  | 2.33                     | 0.73              |
| 3:M:101:LEU:HD12 | 3:M:109:LEU:CD1  | 2.18                     | 0.73              |
| 3:M:437:TYR:CD1  | 3:M:479:PHE:CE1  | 2.76                     | 0.73              |
| 4:S:43:ASN:O     | 4:S:44:SER:C     | 2.20                     | 0.73              |

*Continued on next page...*



*Continued from previous page...*

| Atom-1           | Atom-2           | Interatomic distance (Å) | Clash overlap (Å) |
|------------------|------------------|--------------------------|-------------------|
| 1:A:211:ASP:CG   | 4:S:148:ARG:CZ   | 2.57                     | 0.73              |
| 2:B:219:TYR:C    | 2:B:223:LEU:CD2  | 2.52                     | 0.73              |
| 2:B:567:GLN:C    | 2:B:569:THR:OG1  | 2.26                     | 0.73              |
| 3:M:96:ILE:HG21  | 3:M:125:PHE:CZ   | 2.24                     | 0.73              |
| 3:M:262:THR:O    | 3:M:264:GLY:N    | 2.20                     | 0.73              |
| 3:M:338:PHE:HE2  | 3:M:415:ILE:CG1  | 2.02                     | 0.73              |
| 4:S:17:VAL:CG1   | 4:S:19:PHE:CE1   | 2.71                     | 0.73              |
| 1:A:630:PRO:CB   | 2:B:614:ILE:HG23 | 2.19                     | 0.73              |
| 2:B:208:ILE:HD13 | 2:B:236:ILE:HG21 | 0.73                     | 0.73              |
| 2:B:374:PHE:CZ   | 2:B:398:ILE:HG21 | 2.24                     | 0.73              |
| 2:B:508:ARG:HD2  | 2:B:544:THR:HG21 | 1.70                     | 0.73              |
| 4:S:146:VAL:O    | 4:S:150:VAL:HG23 | 1.88                     | 0.73              |
| 1:A:185:LEU:HD12 | 1:A:203:PHE:CZ   | 2.23                     | 0.73              |
| 1:A:495:ILE:HD12 | 1:A:515:CYS:SG   | 2.28                     | 0.73              |
| 2:B:237:ILE:HG12 | 2:B:309:LEU:HD21 | 1.70                     | 0.73              |
| 2:B:374:PHE:CE1  | 2:B:381:PHE:CD1  | 2.77                     | 0.73              |
| 2:B:403:ILE:HD11 | 2:B:442:LEU:HD12 | 1.70                     | 0.73              |
| 2:B:418:TYR:CD1  | 2:B:424:PHE:CD1  | 2.75                     | 0.73              |
| 2:B:508:ARG:CD   | 2:B:544:THR:HG21 | 2.18                     | 0.73              |
| 2:B:515:PHE:CD2  | 2:B:529:VAL:HG11 | 2.23                     | 0.73              |
| 4:S:109:LEU:HD12 | 4:S:113:PHE:CE1  | 1.91                     | 0.73              |
| 1:A:609:LEU:HG   | 1:A:628:VAL:CG1  | 2.19                     | 0.73              |
| 2:B:154:ILE:HG23 | 2:B:176:ALA:HB1  | 1.71                     | 0.73              |
| 2:B:174:ALA:O    | 2:B:214:ALA:HB1  | 1.88                     | 0.73              |
| 2:B:177:ILE:HG21 | 2:B:196:LEU:CD1  | 2.18                     | 0.73              |
| 2:B:275:ARG:CB   | 2:B:294:VAL:HG13 | 1.82                     | 0.73              |
| 2:B:393:ILE:CG2  | 2:B:431:MET:HB2  | 2.18                     | 0.73              |
| 3:M:65:TYR:CE2   | 3:M:86:PRO:CB    | 2.68                     | 0.73              |
| 3:M:290:PHE:HZ   | 3:M:297:PHE:CD2  | 2.07                     | 0.73              |
| 3:M:343:ASN:HD22 | 3:M:343:ASN:N    | 1.87                     | 0.73              |
| 4:S:10:LYS:HB3   | 4:S:82:THR:O     | 1.89                     | 0.73              |
| 1:A:100:LEU:N    | 4:S:162:SER:CA   | 2.48                     | 0.72              |
| 1:A:252:ILE:HG12 | 4:S:145:ASN:N    | 2.04                     | 0.72              |
| 2:B:154:ILE:HD12 | 2:B:180:LEU:CB   | 2.18                     | 0.72              |
| 2:B:271:GLU:O    | 2:B:272:GLY:C    | 2.20                     | 0.72              |
| 3:M:126:ASN:O    | 3:M:130:GLU:HG2  | 1.88                     | 0.72              |
| 3:M:257:ALA:CB   | 3:M:455:VAL:HG21 | 2.19                     | 0.72              |
| 4:S:50:PHE:CB    | 4:S:76:ILE:HD13  | 2.19                     | 0.72              |
| 4:S:53:THR:CG2   | 4:S:68:VAL:CA    | 2.63                     | 0.72              |
| 1:A:223:CYS:O    | 1:A:226:SER:OG   | 2.03                     | 0.72              |
| 1:A:263:LEU:O    | 1:A:266:VAL:O    | 2.07                     | 0.72              |

*Continued on next page...*

*Continued from previous page...*

| Atom-1           | Atom-2           | Interatomic distance (Å) | Clash overlap (Å) |
|------------------|------------------|--------------------------|-------------------|
| 1:A:408:ILE:HD12 | 1:A:410:TYR:HE1  | 1.51                     | 0.72              |
| 1:A:539:ASN:O    | 1:A:540:ILE:C    | 2.23                     | 0.72              |
| 1:A:557:LYS:CE   | 2:B:606:ASP:CA   | 2.57                     | 0.72              |
| 1:A:633:PHE:HB3  | 2:B:550:VAL:O    | 1.88                     | 0.72              |
| 3:M:7:ILE:HG23   | 3:M:75:TRP:O     | 1.89                     | 0.72              |
| 3:M:316:ARG:O    | 3:M:318:ASN:N    | 2.21                     | 0.72              |
| 1:A:147:LEU:HD21 | 1:A:166:LEU:HD23 | 1.66                     | 0.72              |
| 1:A:402:ILE:O    | 1:A:402:ILE:CG2  | 2.36                     | 0.72              |
| 1:A:636:TYR:N    | 2:B:554:LYS:HD3  | 1.95                     | 0.72              |
| 2:B:63:MET:CG    | 2:B:100:LEU:CB   | 2.67                     | 0.72              |
| 2:B:267:ASP:C    | 2:B:276:SER:OG   | 2.27                     | 0.72              |
| 2:B:352:ASN:H    | 2:B:352:ASN:HD22 | 1.37                     | 0.72              |
| 2:B:553:ALA:CA   | 2:B:614:ILE:CG2  | 2.66                     | 0.72              |
| 2:B:159:LYS:HD2  | 2:B:191:GLU:CG   | 2.18                     | 0.72              |
| 2:B:166:SER:O    | 2:B:170:ARG:HG3  | 1.89                     | 0.72              |
| 2:B:212:VAL:C    | 2:B:214:ALA:H    | 1.93                     | 0.72              |
| 2:B:490:ILE:O    | 2:B:515:PHE:HZ   | 1.71                     | 0.72              |
| 4:S:135:ILE:CG2  | 4:S:141:VAL:HG22 | 2.20                     | 0.72              |
| 1:A:461:CYS:HB2  | 1:A:469:LEU:HD23 | 1.71                     | 0.72              |
| 1:A:599:ARG:HD2  | 2:B:547:GLN:NE2  | 2.04                     | 0.72              |
| 2:B:64:LYS:HA    | 2:B:100:LEU:HD22 | 1.71                     | 0.72              |
| 2:B:106:LEU:CD1  | 2:B:144:ASP:CA   | 2.68                     | 0.72              |
| 2:B:162:VAL:HG21 | 2:B:195:ILE:CA   | 2.20                     | 0.72              |
| 2:B:252:LEU:CB   | 2:B:302:PHE:CE1  | 2.73                     | 0.72              |
| 2:B:278:PRO:N    | 2:B:292:GLU:OE1  | 2.22                     | 0.72              |
| 2:B:368:ILE:CD1  | 2:B:401:THR:HG22 | 2.19                     | 0.72              |
| 2:B:416:LYS:HD2  | 2:B:453:TRP:CE2  | 2.25                     | 0.72              |
| 3:M:353:VAL:CG2  | 3:M:438:SER:O    | 2.37                     | 0.72              |
| 3:M:379:LEU:HD23 | 3:M:386:PHE:CB   | 2.15                     | 0.72              |
| 1:A:564:ASN:OD1  | 1:A:622:PRO:CG   | 2.38                     | 0.72              |
| 1:A:606:PHE:CZ   | 2:B:550:VAL:CG1  | 2.72                     | 0.72              |
| 1:A:637:GLU:HB2  | 2:B:551:LEU:HD22 | 1.69                     | 0.72              |
| 2:B:277:CYS:O    | 2:B:288:TYR:CA   | 2.37                     | 0.72              |
| 2:B:398:ILE:O    | 2:B:401:THR:N    | 2.18                     | 0.72              |
| 2:B:472:VAL:HG11 | 2:B:510:GLY:HA3  | 0.73                     | 0.72              |
| 4:S:44:SER:O     | 4:S:47:GLN:HB2   | 1.89                     | 0.72              |
| 4:S:108:SER:HB3  | 4:S:149:ILE:HG22 | 1.70                     | 0.72              |
| 1:A:63:ASP:O     | 1:A:67:LYS:HG3   | 1.90                     | 0.72              |
| 1:A:94:VAL:HG13  | 1:A:102:GLN:HB3  | 1.64                     | 0.72              |
| 1:A:223:CYS:CB   | 1:A:259:LEU:HG   | 2.17                     | 0.72              |
| 1:A:291:ILE:HG13 | 1:A:318:ARG:HG2  | 1.70                     | 0.72              |

*Continued on next page...*

*Continued from previous page...*

| Atom-1           | Atom-2           | Interatomic distance (Å) | Clash overlap (Å) |
|------------------|------------------|--------------------------|-------------------|
| 2:B:133:GLU:HA   | 2:B:168:MET:SD   | 2.28                     | 0.72              |
| 2:B:170:ARG:CZ   | 2:B:198:GLU:HG2  | 2.20                     | 0.72              |
| 2:B:554:LYS:O    | 2:B:557:SER:N    | 2.21                     | 0.72              |
| 3:M:6:TYR:CD2    | 3:M:14:LEU:HD11  | 2.24                     | 0.72              |
| 3:M:225:VAL:HA   | 3:M:480:GLN:O    | 1.90                     | 0.72              |
| 3:M:243:ILE:HG22 | 3:M:472:TYR:HB3  | 1.72                     | 0.72              |
| 1:A:100:LEU:O    | 4:S:160:ALA:CA   | 1.85                     | 0.72              |
| 1:A:350:SER:O    | 1:A:351:ARG:C    | 2.26                     | 0.72              |
| 1:A:523:SER:OG   | 1:A:562:TRP:NE1  | 1.85                     | 0.72              |
| 1:A:557:LYS:HG3  | 2:B:606:ASP:HB2  | 1.71                     | 0.72              |
| 2:B:20:ARG:HD2   | 2:B:21:GLU:CA    | 2.18                     | 0.72              |
| 2:B:98:LYS:HZ1   | 2:B:134:LEU:HB3  | 0.70                     | 0.72              |
| 2:B:284:ASN:CB   | 2:B:285:GLU:HG3  | 2.20                     | 0.72              |
| 2:B:505:ASP:O    | 2:B:506:ASN:C    | 2.17                     | 0.72              |
| 2:B:564:LYS:CD   | 2:B:621:GLY:O    | 2.37                     | 0.72              |
| 3:M:250:LEU:HD13 | 3:M:254:PRO:HG2  | 1.71                     | 0.72              |
| 3:M:381:ASN:OD1  | 3:M:382:THR:N    | 2.23                     | 0.72              |
| 4:S:75:ILE:CG2   | 4:S:77:TYR:CE1   | 2.72                     | 0.72              |
| 1:A:105:VAL:CG2  | 4:S:167:ILE:CA   | 2.67                     | 0.72              |
| 1:A:166:LEU:HD13 | 1:A:185:LEU:HG   | 1.70                     | 0.72              |
| 1:A:213:SER:H    | 4:S:148:ARG:CD   | 1.90                     | 0.72              |
| 1:A:226:SER:O    | 1:A:230:PRO:HG3  | 1.89                     | 0.72              |
| 1:A:295:VAL:CG2  | 1:A:315:CYS:HB3  | 2.14                     | 0.72              |
| 2:B:51:LEU:HD23  | 2:B:59:VAL:HG13  | 1.69                     | 0.72              |
| 2:B:158:VAL:HG12 | 2:B:177:ILE:HD11 | 1.67                     | 0.72              |
| 1:A:121:LEU:CD1  | 1:A:155:THR:HG23 | 2.20                     | 0.72              |
| 1:A:214:VAL:HG22 | 4:S:148:ARG:NH2  | 2.03                     | 0.72              |
| 1:A:252:ILE:HG12 | 4:S:144:THR:OG1  | 1.89                     | 0.72              |
| 2:B:177:ILE:HD11 | 2:B:195:ILE:HG21 | 1.72                     | 0.72              |
| 2:B:227:HIS:CG   | 2:B:292:GLU:OE2  | 2.43                     | 0.72              |
| 2:B:493:LEU:HG   | 2:B:511:ILE:CG2  | 2.18                     | 0.72              |
| 3:M:290:PHE:HE1  | 3:M:297:PHE:CD1  | 2.05                     | 0.72              |
| 1:A:441:TYR:HB3  | 1:A:444:VAL:CG2  | 2.20                     | 0.71              |
| 2:B:63:MET:HG3   | 2:B:100:LEU:CB   | 2.19                     | 0.71              |
| 2:B:363:ILE:CG2  | 2:B:398:ILE:HG12 | 2.19                     | 0.71              |
| 2:B:374:PHE:CE2  | 2:B:402:LEU:HD11 | 2.25                     | 0.71              |
| 3:M:96:ILE:O     | 3:M:100:LEU:HD12 | 1.90                     | 0.71              |
| 3:M:219:LEU:HG   | 3:M:440:ILE:HG12 | 1.72                     | 0.71              |
| 4:S:55:PRO:C     | 4:S:57:LEU:H     | 1.91                     | 0.71              |
| 1:A:95:MET:C     | 4:S:166:LYS:NZ   | 2.43                     | 0.71              |
| 1:A:149:GLY:O    | 1:A:152:THR:N    | 2.15                     | 0.71              |

*Continued on next page...*

*Continued from previous page...*

| Atom-1           | Atom-2           | Interatomic distance (Å) | Clash overlap (Å) |
|------------------|------------------|--------------------------|-------------------|
| 1:A:204:VAL:O    | 1:A:205:SER:C    | 2.25                     | 0.71              |
| 1:A:268:PRO:HG3  | 1:A:271:ARG:HH21 | 1.55                     | 0.71              |
| 1:A:554:ALA:O    | 1:A:557:LYS:N    | 2.23                     | 0.71              |
| 1:A:603:VAL:HG22 | 2:B:610:ARG:HH21 | 1.55                     | 0.71              |
| 2:B:578:PRO:CB   | 2:B:579:PRO:HD2  | 2.18                     | 0.71              |
| 3:M:243:ILE:O    | 3:M:472:TYR:CG   | 2.42                     | 0.71              |
| 3:M:258:VAL:HG13 | 3:M:449:VAL:HG11 | 1.71                     | 0.71              |
| 4:S:14:PRO:O     | 4:S:15:ARG:HD3   | 1.90                     | 0.71              |
| 4:S:57:LEU:CB    | 4:S:67:GLU:O     | 2.38                     | 0.71              |
| 1:A:80:TYR:CG    | 1:A:82:PHE:CE2   | 2.78                     | 0.71              |
| 1:A:170:LEU:CD1  | 1:A:206:LYS:HG3  | 2.21                     | 0.71              |
| 1:A:212:ILE:CB   | 1:A:247:ILE:CD1  | 2.68                     | 0.71              |
| 1:A:353:ASP:OD1  | 1:A:378:ILE:CD1  | 2.39                     | 0.71              |
| 1:A:603:VAL:O    | 1:A:606:PHE:HB2  | 1.89                     | 0.71              |
| 2:B:403:ILE:HB   | 2:B:408:VAL:HG22 | 1.72                     | 0.71              |
| 2:B:545:ARG:CD   | 2:B:602:ASP:CB   | 2.65                     | 0.71              |
| 2:B:546:CYS:HA   | 2:B:607:ILE:CB   | 2.20                     | 0.71              |
| 2:B:550:VAL:O    | 2:B:553:ALA:HB3  | 1.89                     | 0.71              |
| 3:M:225:VAL:HG22 | 3:M:480:GLN:HB3  | 1.71                     | 0.71              |
| 1:A:100:LEU:HD22 | 1:A:138:ASN:HB3  | 1.72                     | 0.71              |
| 1:A:101:GLN:N    | 4:S:163:THR:H    | 1.88                     | 0.71              |
| 1:A:103:LYS:CA   | 4:S:163:THR:HG21 | 2.20                     | 0.71              |
| 1:A:121:LEU:HD11 | 1:A:155:THR:HG23 | 1.73                     | 0.71              |
| 2:B:154:ILE:HD12 | 2:B:180:LEU:HB2  | 1.70                     | 0.71              |
| 2:B:215:TYR:CE2  | 2:B:229:HIS:HB3  | 2.25                     | 0.71              |
| 1:A:141:VAL:CB   | 4:S:159:ALA:CB   | 2.67                     | 0.71              |
| 1:A:189:PHE:HB2  | 1:A:225:LEU:HD21 | 1.72                     | 0.71              |
| 1:A:275:LEU:O    | 1:A:277:LYS:N    | 2.23                     | 0.71              |
| 1:A:585:PHE:CE2  | 1:A:603:VAL:HG12 | 2.25                     | 0.71              |
| 2:B:2:VAL:O      | 2:B:6:HIS:CD2    | 2.43                     | 0.71              |
| 2:B:93:ASN:CA    | 2:B:134:LEU:HD11 | 2.21                     | 0.71              |
| 2:B:431:MET:O    | 2:B:433:VAL:N    | 2.23                     | 0.71              |
| 3:M:18:TYR:HE2   | 3:M:20:LEU:HD23  | 1.54                     | 0.71              |
| 3:M:99:ILE:HD12  | 3:M:99:ILE:N     | 2.04                     | 0.71              |
| 3:M:220:GLU:N    | 3:M:439:TYR:O    | 2.23                     | 0.71              |
| 3:M:287:ASN:OD1  | 3:M:288:ILE:N    | 2.22                     | 0.71              |
| 3:M:341:SER:HG   | 3:M:343:ASN:HD21 | 1.38                     | 0.71              |
| 3:M:347:PHE:CZ   | 3:M:350:VAL:HG11 | 2.26                     | 0.71              |
| 3:M:374:TYR:HB3  | 3:M:417:TYR:CD2  | 2.23                     | 0.71              |
| 3:M:376:ILE:HD12 | 3:M:415:ILE:HG12 | 1.71                     | 0.71              |
| 4:S:53:THR:H     | 4:S:69:ASN:CB    | 2.04                     | 0.71              |

*Continued on next page...*

*Continued from previous page...*

| Atom-1           | Atom-2           | Interatomic distance (Å) | Clash overlap (Å) |
|------------------|------------------|--------------------------|-------------------|
| 4:S:135:ILE:O    | 4:S:141:VAL:CG2  | 2.38                     | 0.71              |
| 1:A:179:LYS:CD   | 4:S:143:GLU:CB   | 2.68                     | 0.71              |
| 1:A:212:ILE:HB   | 1:A:247:ILE:HD12 | 1.73                     | 0.71              |
| 1:A:329:ASN:OD1  | 4:S:50:PHE:HZ    | 1.72                     | 0.71              |
| 1:A:626:SER:C    | 2:B:617:LEU:HG   | 2.10                     | 0.71              |
| 2:B:108:PHE:CD2  | 2:B:115:LEU:CB   | 2.73                     | 0.71              |
| 2:B:120:ILE:CG1  | 2:B:150:LEU:HD22 | 2.21                     | 0.71              |
| 2:B:231:ARG:NH2  | 2:B:297:PRO:HD2  | 2.04                     | 0.71              |
| 2:B:247:TYR:HE2  | 3:M:91:THR:CG2   | 1.88                     | 0.71              |
| 2:B:337:THR:HA   | 2:B:373:LEU:HD21 | 0.75                     | 0.71              |
| 2:B:403:ILE:HG22 | 2:B:411:ILE:HD12 | 1.71                     | 0.71              |
| 3:M:52:ASP:HA    | 3:M:68:VAL:N     | 2.04                     | 0.71              |
| 3:M:101:LEU:CB   | 3:M:109:LEU:HD13 | 2.20                     | 0.71              |
| 3:M:258:VAL:HG22 | 3:M:452:ILE:CG1  | 2.20                     | 0.71              |
| 3:M:290:PHE:CE2  | 3:M:297:PHE:CE2  | 2.77                     | 0.71              |
| 3:M:343:ASN:HA   | 3:M:408:VAL:CG1  | 2.11                     | 0.71              |
| 3:M:405:THR:HG22 | 3:M:406:GLY:N    | 2.04                     | 0.71              |
| 3:M:448:TYR:HE2  | 3:M:450:GLU:OE1  | 1.74                     | 0.71              |
| 1:A:266:VAL:O    | 1:A:267:GLU:HB3  | 1.90                     | 0.71              |
| 1:A:332:TYR:HE1  | 1:A:366:SER:HB2  | 1.56                     | 0.71              |
| 1:A:436:CYS:CB   | 1:A:450:TYR:CE1  | 2.73                     | 0.71              |
| 2:B:20:ARG:NH1   | 2:B:35:TYR:CZ    | 2.48                     | 0.71              |
| 2:B:120:ILE:HG13 | 2:B:150:LEU:HD22 | 1.73                     | 0.71              |
| 2:B:169:VAL:O    | 2:B:173:VAL:HG23 | 1.91                     | 0.71              |
| 2:B:278:PRO:HB2  | 2:B:288:TYR:O    | 1.87                     | 0.71              |
| 2:B:396:ILE:HD13 | 2:B:418:TYR:OH   | 1.89                     | 0.71              |
| 3:M:81:SER:O     | 3:M:82:LYS:CB    | 2.38                     | 0.71              |
| 3:M:256:VAL:CG2  | 3:M:452:ILE:HG22 | 2.20                     | 0.71              |
| 4:S:98:ILE:O     | 4:S:102:ILE:HG13 | 1.91                     | 0.71              |
| 1:A:638:LEU:HD11 | 2:B:526:CYS:SG   | 2.31                     | 0.71              |
| 2:B:129:ASP:O    | 2:B:135:ARG:HD3  | 1.91                     | 0.71              |
| 2:B:137:PHE:O    | 2:B:140:SER:HB3  | 1.91                     | 0.71              |
| 2:B:267:ASP:HB3  | 2:B:289:PRO:CG   | 2.21                     | 0.71              |
| 2:B:563:PHE:CA   | 2:B:566:ALA:HB3  | 2.19                     | 0.71              |
| 3:M:65:TYR:CE1   | 3:M:86:PRO:CG    | 2.74                     | 0.71              |
| 3:M:293:PRO:HB2  | 3:M:294:ASP:O    | 1.91                     | 0.71              |
| 4:S:105:PHE:CZ   | 4:S:128:LEU:CD1  | 2.74                     | 0.71              |
| 1:A:147:LEU:HB3  | 1:A:184:ALA:HB1  | 1.70                     | 0.71              |
| 1:A:400:VAL:O    | 1:A:403:LEU:HB2  | 1.90                     | 0.71              |
| 1:A:520:GLY:HA2  | 1:A:558:VAL:HG22 | 1.67                     | 0.71              |
| 1:A:594:PHE:CD2  | 2:B:474:VAL:HG22 | 2.25                     | 0.71              |

*Continued on next page...*

*Continued from previous page...*

| Atom-1           | Atom-2           | Interatomic distance (Å) | Clash overlap (Å) |
|------------------|------------------|--------------------------|-------------------|
| 2:B:169:VAL:HG12 | 2:B:173:VAL:CG2  | 2.20                     | 0.71              |
| 2:B:303:LEU:HD23 | 2:B:325:LEU:HD23 | 1.73                     | 0.71              |
| 2:B:549:LEU:HG   | 2:B:614:ILE:CD1  | 2.20                     | 0.71              |
| 3:M:340:LEU:C    | 3:M:411:LEU:HB3  | 2.12                     | 0.71              |
| 4:S:7:ILE:HD12   | 4:S:16:LEU:HD23  | 1.71                     | 0.71              |
| 1:A:179:LYS:O    | 4:S:142:ILE:HD11 | 1.91                     | 0.71              |
| 1:A:244:LEU:O    | 1:A:245:VAL:C    | 2.28                     | 0.71              |
| 2:B:6:HIS:CG     | 3:M:25:PRO:HB3   | 2.26                     | 0.71              |
| 2:B:47:LEU:CD2   | 2:B:66:ILE:HG12  | 1.93                     | 0.71              |
| 2:B:50:LEU:HD23  | 2:B:62:ALA:HB2   | 1.73                     | 0.71              |
| 2:B:537:PHE:CE2  | 2:B:598:LEU:C    | 2.63                     | 0.71              |
| 3:M:341:SER:HA   | 3:M:411:LEU:H    | 1.56                     | 0.71              |
| 3:M:360:LEU:HD23 | 3:M:362:PHE:HZ   | 1.55                     | 0.71              |
| 3:M:372:ILE:CD1  | 3:M:428:VAL:HG22 | 2.21                     | 0.71              |
| 2:B:153:ILE:C    | 2:B:155:LEU:N    | 2.44                     | 0.70              |
| 2:B:252:LEU:HB3  | 2:B:302:PHE:CE2  | 2.25                     | 0.70              |
| 2:B:275:ARG:HB3  | 2:B:291:TYR:CD2  | 2.25                     | 0.70              |
| 2:B:368:ILE:HD13 | 2:B:401:THR:HG22 | 1.72                     | 0.70              |
| 2:B:378:THR:CG2  | 2:B:379:LYS:N    | 2.54                     | 0.70              |
| 2:B:418:TYR:CD1  | 2:B:419:VAL:HA   | 2.26                     | 0.70              |
| 3:M:219:LEU:O    | 3:M:474:THR:HG21 | 1.91                     | 0.70              |
| 3:M:323:MET:CE   | 3:M:342:LEU:HB3  | 2.21                     | 0.70              |
| 3:M:373:ALA:O    | 3:M:418:GLU:N    | 2.24                     | 0.70              |
| 4:S:50:PHE:CB    | 4:S:76:ILE:HA    | 2.20                     | 0.70              |
| 1:A:528:ASN:O    | 1:A:530:ASN:N    | 2.24                     | 0.70              |
| 2:B:375:LEU:O    | 2:B:377:TYR:N    | 2.23                     | 0.70              |
| 2:B:458:MET:O    | 2:B:460:SER:N    | 2.25                     | 0.70              |
| 2:B:530:LEU:HD23 | 2:B:591:MET:CB   | 2.21                     | 0.70              |
| 3:M:224:VAL:CG2  | 3:M:479:PHE:CD1  | 2.74                     | 0.70              |
| 3:M:343:ASN:HD22 | 3:M:343:ASN:H    | 1.39                     | 0.70              |
| 3:M:443:SER:CB   | 3:M:447:ILE:C    | 2.59                     | 0.70              |
| 4:S:135:ILE:HG22 | 4:S:141:VAL:CG2  | 2.20                     | 0.70              |
| 1:A:103:LYS:N    | 4:S:163:THR:OG1  | 2.14                     | 0.70              |
| 1:A:179:LYS:O    | 4:S:142:ILE:CD1  | 2.40                     | 0.70              |
| 1:A:462:GLN:O    | 1:A:463:ASP:C    | 2.26                     | 0.70              |
| 2:B:127:LEU:HA   | 2:B:161:LEU:HD11 | 1.72                     | 0.70              |
| 2:B:245:GLN:NE2  | 2:B:309:LEU:HD11 | 2.05                     | 0.70              |
| 2:B:285:GLU:O    | 2:B:286:ILE:HG22 | 1.91                     | 0.70              |
| 2:B:549:LEU:CD1  | 2:B:611:ALA:HB2  | 2.07                     | 0.70              |
| 3:M:215:TYR:HB3  | 3:M:467:TYR:CD2  | 2.21                     | 0.70              |
| 3:M:240:ILE:HD11 | 3:M:306:LEU:HD11 | 1.72                     | 0.70              |

*Continued on next page...*

*Continued from previous page...*

| Atom-1           | Atom-2           | Interatomic distance (Å) | Clash overlap (Å) |
|------------------|------------------|--------------------------|-------------------|
| 1:A:129:LYS:HD2  | 1:A:161:ASP:HB3  | 1.73                     | 0.70              |
| 1:A:222:ILE:HD12 | 1:A:240:LEU:HD21 | 1.71                     | 0.70              |
| 2:B:212:VAL:HG13 | 2:B:248:LEU:HD23 | 1.71                     | 0.70              |
| 2:B:267:ASP:O    | 2:B:269:SER:N    | 2.25                     | 0.70              |
| 2:B:515:PHE:CE2  | 2:B:529:VAL:CG2  | 2.73                     | 0.70              |
| 2:B:546:CYS:CA   | 2:B:607:ILE:CG1  | 2.54                     | 0.70              |
| 3:M:306:LEU:O    | 3:M:307:SER:O    | 2.10                     | 0.70              |
| 3:M:331:LEU:HD12 | 3:M:331:LEU:O    | 1.91                     | 0.70              |
| 1:A:105:VAL:HG21 | 4:S:167:ILE:HA   | 1.73                     | 0.70              |
| 1:A:150:LEU:HD22 | 1:A:162:ILE:HG12 | 1.73                     | 0.70              |
| 1:A:163:ALA:CB   | 1:A:195:ALA:CB   | 2.55                     | 0.70              |
| 1:A:403:LEU:HD21 | 1:A:421:PRO:O    | 1.91                     | 0.70              |
| 2:B:215:TYR:CE1  | 2:B:233:TYR:CE1  | 2.77                     | 0.70              |
| 2:B:292:GLU:CG   | 2:B:296:ASP:CB   | 2.65                     | 0.70              |
| 2:B:563:PHE:CD2  | 2:B:584:SER:HB3  | 2.24                     | 0.70              |
| 3:M:65:TYR:CD2   | 3:M:86:PRO:HB3   | 2.26                     | 0.70              |
| 3:M:244:VAL:CB   | 3:M:300:LEU:HG   | 2.20                     | 0.70              |
| 3:M:258:VAL:HG22 | 3:M:452:ILE:HG21 | 1.72                     | 0.70              |
| 3:M:283:PHE:CE1  | 3:M:289:THR:OG1  | 2.39                     | 0.70              |
| 3:M:378:ILE:C    | 3:M:379:LEU:HD12 | 2.11                     | 0.70              |
| 3:M:452:ILE:HD12 | 3:M:452:ILE:N    | 2.06                     | 0.70              |
| 4:S:69:ASN:OD1   | 4:S:73:ILE:O     | 2.09                     | 0.70              |
| 1:A:67:LYS:CB    | 4:S:165:SER:C    | 2.59                     | 0.70              |
| 1:A:399:ASP:C    | 1:A:420:ILE:H    | 1.95                     | 0.70              |
| 2:B:120:ILE:HD12 | 2:B:142:LEU:HD22 | 1.72                     | 0.70              |
| 2:B:306:LEU:HD22 | 2:B:321:CYS:HA   | 1.72                     | 0.70              |
| 3:M:215:TYR:O    | 3:M:246:VAL:HG13 | 1.90                     | 0.70              |
| 3:M:256:VAL:CG2  | 3:M:452:ILE:CG2  | 2.70                     | 0.70              |
| 2:B:159:LYS:CE   | 2:B:191:GLU:OE1  | 2.39                     | 0.70              |
| 2:B:252:LEU:HB3  | 2:B:302:PHE:CG   | 2.27                     | 0.70              |
| 2:B:584:SER:O    | 2:B:585:GLY:C    | 2.20                     | 0.70              |
| 3:M:217:ASP:OD1  | 3:M:217:ASP:O    | 2.10                     | 0.70              |
| 3:M:374:TYR:H    | 3:M:390:ILE:HG23 | 1.56                     | 0.70              |
| 1:A:129:LYS:HD2  | 1:A:161:ASP:CB   | 2.22                     | 0.70              |
| 1:A:182:ILE:HG21 | 1:A:218:ALA:CA   | 2.22                     | 0.70              |
| 1:A:421:PRO:HB2  | 1:A:424:TYR:CD1  | 2.27                     | 0.70              |
| 2:B:139:LEU:HD23 | 2:B:172:GLU:O    | 1.91                     | 0.70              |
| 2:B:217:GLU:O    | 2:B:218:CYS:C    | 2.28                     | 0.70              |
| 2:B:278:PRO:CA   | 2:B:292:GLU:OE1  | 2.40                     | 0.70              |
| 2:B:475:ILE:HG22 | 2:B:514:LEU:CD2  | 2.22                     | 0.70              |
| 2:B:515:PHE:HE2  | 2:B:529:VAL:CG2  | 2.01                     | 0.70              |

*Continued on next page...*

*Continued from previous page...*

| Atom-1           | Atom-2           | Interatomic distance (Å) | Clash overlap (Å) |
|------------------|------------------|--------------------------|-------------------|
| 2:B:589:SER:HG   | 2:B:618:PHE:HZ   | 1.35                     | 0.70              |
| 3:M:246:VAL:HB   | 3:M:297:PHE:CE1  | 2.26                     | 0.70              |
| 4:S:16:LEU:HD12  | 4:S:17:VAL:N     | 2.07                     | 0.70              |
| 1:A:67:LYS:CG    | 4:S:165:SER:OG   | 2.40                     | 0.70              |
| 1:A:609:LEU:CD2  | 1:A:628:VAL:CG2  | 2.56                     | 0.70              |
| 2:B:230:PHE:HD2  | 2:B:298:ASP:CB   | 2.03                     | 0.70              |
| 3:M:276:VAL:CG2  | 3:M:299:LEU:HD12 | 2.21                     | 0.70              |
| 1:A:237:SER:N    | 1:A:238:PRO:HD2  | 2.07                     | 0.70              |
| 1:A:582:ILE:CD1  | 1:A:608:ARG:HA   | 2.22                     | 0.70              |
| 1:A:603:VAL:HG22 | 2:B:610:ARG:NH2  | 2.07                     | 0.70              |
| 2:B:20:ARG:CZ    | 2:B:35:TYR:OH    | 2.38                     | 0.70              |
| 2:B:216:LYS:HB2  | 2:B:251:LEU:CD1  | 2.04                     | 0.70              |
| 2:B:422:ALA:HB2  | 2:B:424:PHE:CE1  | 2.27                     | 0.70              |
| 3:M:217:ASP:OD2  | 3:M:470:ALA:O    | 2.09                     | 0.70              |
| 3:M:226:PHE:O    | 3:M:481:VAL:HA   | 1.91                     | 0.70              |
| 3:M:350:VAL:HG13 | 3:M:442:GLN:HB2  | 1.72                     | 0.70              |
| 4:S:5:VAL:HB     | 4:S:132:LEU:CD2  | 2.21                     | 0.70              |
| 4:S:75:ILE:CG2   | 4:S:77:TYR:CZ    | 2.75                     | 0.70              |
| 4:S:75:ILE:HG21  | 4:S:77:TYR:CZ    | 2.26                     | 0.70              |
| 1:A:450:TYR:CE1  | 1:A:454:ILE:HD11 | 2.25                     | 0.69              |
| 1:A:488:ARG:CG   | 1:A:522:PHE:CE2  | 2.71                     | 0.69              |
| 2:B:42:ILE:O     | 2:B:43:ASN:CB    | 2.40                     | 0.69              |
| 2:B:408:VAL:HG11 | 2:B:412:PHE:CE2  | 2.27                     | 0.69              |
| 2:B:546:CYS:SG   | 2:B:607:ILE:HG13 | 2.32                     | 0.69              |
| 2:B:574:ASN:O    | 2:B:576:GLN:O    | 2.10                     | 0.69              |
| 2:B:592:TYR:CZ   | 2:B:619:ASP:OD1  | 2.44                     | 0.69              |
| 2:B:599:ALA:O    | 2:B:601:TYR:N    | 2.25                     | 0.69              |
| 3:M:9:ASP:CA     | 3:M:75:TRP:HD1   | 2.04                     | 0.69              |
| 1:A:107:TYR:HB3  | 1:A:149:GLY:HA3  | 1.74                     | 0.69              |
| 1:A:211:ASP:CG   | 4:S:148:ARG:NE   | 2.46                     | 0.69              |
| 1:A:217:ALA:HB1  | 4:S:142:ILE:HD12 | 0.73                     | 0.69              |
| 2:B:36:THR:O     | 2:B:40:GLN:HB2   | 1.93                     | 0.69              |
| 2:B:120:ILE:HG22 | 2:B:153:ILE:HB   | 1.74                     | 0.69              |
| 3:M:53:HIS:HB3   | 3:M:65:TYR:CE1   | 2.28                     | 0.69              |
| 3:M:323:MET:SD   | 3:M:342:LEU:HA   | 2.32                     | 0.69              |
| 1:A:252:ILE:CG1  | 4:S:144:THR:OG1  | 2.41                     | 0.69              |
| 1:A:282:MET:HE3  | 1:A:294:SER:HB2  | 1.75                     | 0.69              |
| 1:A:398:GLU:O    | 1:A:419:ILE:C    | 2.30                     | 0.69              |
| 1:A:421:PRO:HG2  | 1:A:424:TYR:CZ   | 2.27                     | 0.69              |
| 2:B:68:SER:O     | 2:B:71:ALA:N     | 2.24                     | 0.69              |
| 2:B:70:MET:HE1   | 2:B:107:ARG:HB2  | 0.70                     | 0.69              |

*Continued on next page...*



*Continued from previous page...*

| Atom-1           | Atom-2           | Interatomic distance (Å) | Clash overlap (Å) |
|------------------|------------------|--------------------------|-------------------|
| 2:B:319:LEU:HD13 | 2:B:358:MET:HG2  | 1.69                     | 0.69              |
| 2:B:563:PHE:CE2  | 2:B:584:SER:HA   | 2.25                     | 0.69              |
| 2:B:565:GLN:C    | 2:B:574:ASN:ND2  | 2.38                     | 0.69              |
| 1:A:215:VAL:HG21 | 1:A:243:ILE:CD1  | 2.15                     | 0.69              |
| 2:B:155:LEU:HD13 | 2:B:156:HIS:N    | 2.07                     | 0.69              |
| 2:B:435:SER:O    | 2:B:437:SER:N    | 2.26                     | 0.69              |
| 2:B:508:ARG:HB3  | 2:B:544:THR:HG23 | 1.68                     | 0.69              |
| 2:B:550:VAL:CG2  | 2:B:610:ARG:HD2  | 2.22                     | 0.69              |
| 3:M:101:LEU:HD11 | 3:M:106:LYS:O    | 1.91                     | 0.69              |
| 3:M:231:SER:O    | 3:M:326:HIS:CE1  | 2.46                     | 0.69              |
| 1:A:140:VAL:HG13 | 1:A:176:TYR:CB   | 2.21                     | 0.69              |
| 1:A:147:LEU:HB3  | 1:A:184:ALA:HB3  | 1.67                     | 0.69              |
| 1:A:219:VAL:C    | 4:S:140:MET:SD   | 2.49                     | 0.69              |
| 1:A:225:LEU:HB3  | 1:A:233:PHE:CZ   | 2.26                     | 0.69              |
| 2:B:67:ILE:CD1   | 2:B:103:LEU:CB   | 2.71                     | 0.69              |
| 2:B:132:SER:O    | 2:B:133:GLU:C    | 2.24                     | 0.69              |
| 2:B:162:VAL:HG23 | 2:B:195:ILE:HG22 | 1.54                     | 0.69              |
| 2:B:174:ALA:HB1  | 2:B:211:ALA:CB   | 2.22                     | 0.69              |
| 2:B:178:ILE:HA   | 2:B:218:CYS:CB   | 2.14                     | 0.69              |
| 2:B:215:TYR:HD2  | 2:B:226:LEU:CD1  | 2.04                     | 0.69              |
| 2:B:247:TYR:CZ   | 3:M:91:THR:CG2   | 2.68                     | 0.69              |
| 2:B:306:LEU:HD12 | 2:B:325:LEU:HD23 | 1.73                     | 0.69              |
| 2:B:353:GLN:CG   | 3:M:47:SER:CB    | 2.70                     | 0.69              |
| 2:B:493:LEU:CD2  | 2:B:511:ILE:HG23 | 2.22                     | 0.69              |
| 3:M:220:GLU:CD   | 3:M:442:GLN:HB3  | 2.12                     | 0.69              |
| 4:S:14:PRO:HA    | 4:S:36:TYR:HH    | 1.56                     | 0.69              |
| 1:A:250:ASN:OD1  | 1:A:285:THR:CB   | 2.38                     | 0.69              |
| 1:A:408:ILE:N    | 4:S:64:ASN:HB2   | 2.07                     | 0.69              |
| 2:B:219:TYR:CD2  | 2:B:226:LEU:CB   | 2.64                     | 0.69              |
| 2:B:322:CYS:HA   | 2:B:325:LEU:HD12 | 1.73                     | 0.69              |
| 2:B:500:GLN:CD   | 2:B:503:LEU:HD21 | 2.12                     | 0.69              |
| 2:B:613:MET:HE3  | 2:B:617:LEU:HD11 | 1.74                     | 0.69              |
| 1:A:97:SER:C     | 1:A:98:ASN:O     | 2.05                     | 0.69              |
| 1:A:323:CYS:HG   | 1:A:338:PHE:HE1  | 0.74                     | 0.69              |
| 2:B:64:LYS:HG3   | 2:B:100:LEU:HD11 | 1.73                     | 0.69              |
| 2:B:206:LYS:O    | 2:B:210:CYS:SG   | 2.42                     | 0.69              |
| 2:B:433:VAL:CG1  | 2:B:474:VAL:HB   | 2.22                     | 0.69              |
| 2:B:569:THR:HG22 | 2:B:569:THR:O    | 1.92                     | 0.69              |
| 4:S:9:ASN:ND2    | 4:S:13:GLN:CB    | 2.55                     | 0.69              |
| 1:A:104:ARG:HE   | 4:S:160:ALA:CB   | 2.06                     | 0.69              |
| 1:A:140:VAL:HG11 | 1:A:176:TYR:HB2  | 1.64                     | 0.69              |

*Continued on next page...*

*Continued from previous page...*

| Atom-1           | Atom-2           | Interatomic distance (Å) | Clash overlap (Å) |
|------------------|------------------|--------------------------|-------------------|
| 1:A:186:PHE:CE2  | 1:A:187:LYS:HD3  | 2.28                     | 0.69              |
| 1:A:206:LYS:HE2  | 1:A:206:LYS:HA   | 1.74                     | 0.69              |
| 1:A:207:LEU:HD21 | 1:A:239:LEU:HB2  | 1.75                     | 0.69              |
| 1:A:288:THR:HA   | 1:A:291:ILE:HD13 | 1.73                     | 0.69              |
| 1:A:477:PHE:CE2  | 1:A:481:MET:SD   | 2.86                     | 0.69              |
| 1:A:594:PHE:CD1  | 2:B:434:LYS:HE2  | 2.27                     | 0.69              |
| 2:B:37:TYR:CE2   | 2:B:38:TYR:CD1   | 2.77                     | 0.69              |
| 2:B:121:ASN:O    | 2:B:124:GLN:HB3  | 1.93                     | 0.69              |
| 2:B:177:ILE:CB   | 2:B:196:LEU:HD21 | 2.18                     | 0.69              |
| 2:B:178:ILE:HG12 | 2:B:214:ALA:HB1  | 1.74                     | 0.69              |
| 2:B:182:ARG:NE   | 2:B:217:GLU:OE1  | 2.26                     | 0.69              |
| 2:B:230:PHE:CE2  | 2:B:234:CYS:SG   | 2.86                     | 0.69              |
| 2:B:236:ILE:CG2  | 2:B:240:LEU:HD11 | 2.21                     | 0.69              |
| 2:B:508:ARG:CB   | 2:B:544:THR:HG21 | 2.22                     | 0.69              |
| 2:B:513:TRP:CB   | 2:B:551:LEU:CD2  | 2.67                     | 0.69              |
| 2:B:519:ALA:O    | 2:B:523:PHE:CA   | 2.41                     | 0.69              |
| 2:B:525:ILE:O    | 2:B:527:PRO:HD2  | 1.93                     | 0.69              |
| 3:M:16:PHE:HZ    | 3:M:18:TYR:HB2   | 1.52                     | 0.69              |
| 3:M:214:LEU:O    | 3:M:467:TYR:CA   | 2.41                     | 0.69              |
| 3:M:215:TYR:O    | 3:M:470:ALA:HB2  | 1.92                     | 0.69              |
| 3:M:224:VAL:O    | 3:M:479:PHE:CB   | 2.40                     | 0.69              |
| 3:M:233:LEU:HD21 | 3:M:325:LEU:H    | 1.56                     | 0.69              |
| 3:M:235:LEU:HD11 | 3:M:306:LEU:HB3  | 1.71                     | 0.69              |
| 3:M:246:VAL:HA   | 3:M:470:ALA:HB1  | 1.74                     | 0.69              |
| 1:A:189:PHE:CB   | 1:A:225:LEU:CD2  | 2.71                     | 0.69              |
| 1:A:211:ASP:CG   | 4:S:148:ARG:NH1  | 2.46                     | 0.69              |
| 1:A:252:ILE:HG13 | 4:S:145:ASN:N    | 2.07                     | 0.69              |
| 1:A:272:ALA:O    | 1:A:276:PRO:HD3  | 1.93                     | 0.69              |
| 1:A:298:ILE:CD1  | 1:A:311:THR:CG2  | 2.69                     | 0.69              |
| 1:A:629:LEU:CD1  | 2:B:610:ARG:HH11 | 1.74                     | 0.69              |
| 2:B:116:THR:O    | 2:B:120:ILE:HG12 | 1.93                     | 0.69              |
| 2:B:215:TYR:CZ   | 2:B:229:HIS:CB   | 2.76                     | 0.69              |
| 2:B:267:ASP:O    | 2:B:276:SER:HB2  | 1.93                     | 0.69              |
| 2:B:275:ARG:HG3  | 2:B:291:TYR:CE2  | 2.28                     | 0.69              |
| 2:B:357:GLU:HG2  | 2:B:361:GLN:NE2  | 2.06                     | 0.69              |
| 2:B:374:PHE:HZ   | 2:B:381:PHE:CD1  | 2.09                     | 0.69              |
| 3:M:55:MET:O     | 3:M:56:VAL:C     | 2.17                     | 0.69              |
| 3:M:260:LEU:HD23 | 3:M:449:VAL:HG22 | 0.73                     | 0.69              |
| 3:M:374:TYR:HB2  | 3:M:417:TYR:CD2  | 2.28                     | 0.69              |
| 3:M:378:ILE:HB   | 3:M:413:GLY:HA2  | 1.73                     | 0.69              |
| 4:S:7:ILE:CG2    | 4:S:121:LEU:CD2  | 2.70                     | 0.69              |

*Continued on next page...*

*Continued from previous page...*

| Atom-1           | Atom-2           | Interatomic distance (Å) | Clash overlap (Å) |
|------------------|------------------|--------------------------|-------------------|
| 1:A:231:GLN:HB2  | 1:A:232:PRO:HD3  | 1.74                     | 0.69              |
| 1:A:322:PHE:HD2  | 1:A:330:LEU:HD21 | 1.53                     | 0.69              |
| 1:A:332:TYR:CZ   | 1:A:336:ILE:CD1  | 2.75                     | 0.69              |
| 1:A:482:ILE:HG12 | 1:A:517:TRP:CZ3  | 2.27                     | 0.69              |
| 1:A:582:ILE:HG12 | 1:A:607:LEU:HB2  | 1.74                     | 0.69              |
| 2:B:87:VAL:O     | 2:B:90:ILE:HG22  | 1.93                     | 0.69              |
| 2:B:171:GLY:HA3  | 2:B:207:VAL:HA   | 1.75                     | 0.69              |
| 2:B:332:LEU:HG   | 2:B:332:LEU:O    | 1.93                     | 0.69              |
| 2:B:523:PHE:HB2  | 2:B:559:ASP:OD2  | 1.93                     | 0.69              |
| 3:M:472:TYR:CD1  | 3:M:472:TYR:N    | 2.58                     | 0.69              |
| 4:S:15:ARG:HH21  | 4:S:118:GLU:CD   | 1.96                     | 0.69              |
| 4:S:53:THR:OG1   | 4:S:68:VAL:O     | 2.10                     | 0.69              |
| 4:S:75:ILE:HG21  | 4:S:77:TYR:OH    | 1.92                     | 0.69              |
| 1:A:64:LEU:CG    | 1:A:102:GLN:NE2  | 2.44                     | 0.68              |
| 1:A:101:GLN:CD   | 4:S:167:ILE:HG21 | 2.12                     | 0.68              |
| 1:A:186:PHE:HD2  | 1:A:187:LYS:N    | 1.91                     | 0.68              |
| 1:A:211:ASP:OD2  | 4:S:148:ARG:HD3  | 1.93                     | 0.68              |
| 1:A:223:CYS:HB2  | 1:A:259:LEU:CG   | 2.19                     | 0.68              |
| 1:A:488:ARG:HG2  | 1:A:522:PHE:CD2  | 2.28                     | 0.68              |
| 1:A:552:ILE:HG22 | 1:A:603:VAL:HG21 | 1.74                     | 0.68              |
| 2:B:8:ILE:O      | 2:B:12:LEU:HD12  | 1.92                     | 0.68              |
| 2:B:81:LEU:C     | 2:B:83:PHE:N     | 2.33                     | 0.68              |
| 2:B:135:ARG:CZ   | 2:B:164:ASP:HB2  | 2.24                     | 0.68              |
| 2:B:267:ASP:O    | 2:B:268:LYS:C    | 2.29                     | 0.68              |
| 2:B:306:LEU:HB2  | 2:B:325:LEU:HD21 | 1.74                     | 0.68              |
| 2:B:360:LEU:HD11 | 2:B:391:ALA:CB   | 2.22                     | 0.68              |
| 2:B:542:PRO:O    | 2:B:545:ARG:N    | 2.26                     | 0.68              |
| 2:B:592:TYR:HD2  | 2:B:618:PHE:CE2  | 2.09                     | 0.68              |
| 3:M:339:GLU:HG3  | 3:M:412:ARG:HD3  | 1.75                     | 0.68              |
| 3:M:410:VAL:HG13 | 3:M:412:ARG:NH1  | 2.08                     | 0.68              |
| 4:S:87:PHE:CE1   | 4:S:102:ILE:HG12 | 2.27                     | 0.68              |
| 1:A:244:LEU:HB2  | 1:A:256:LEU:HD13 | 1.74                     | 0.68              |
| 1:A:566:PHE:C    | 1:A:568:GLU:H    | 1.96                     | 0.68              |
| 1:A:630:PRO:CG   | 2:B:614:ILE:CA   | 2.60                     | 0.68              |
| 2:B:48:VAL:O     | 2:B:51:LEU:N     | 2.22                     | 0.68              |
| 2:B:307:ASN:OD1  | 2:B:339:PHE:HD2  | 1.76                     | 0.68              |
| 2:B:340:ILE:CG1  | 2:B:373:LEU:CD2  | 2.70                     | 0.68              |
| 2:B:352:ASN:CB   | 3:M:49:ASP:CB    | 2.48                     | 0.68              |
| 3:M:245:ASP:OD1  | 3:M:297:PHE:C    | 2.32                     | 0.68              |
| 1:A:636:TYR:H    | 2:B:554:LYS:NZ   | 1.90                     | 0.68              |
| 2:B:542:PRO:C    | 2:B:602:ASP:OD2  | 2.31                     | 0.68              |

*Continued on next page...*

*Continued from previous page...*

| Atom-1           | Atom-2           | Interatomic distance (Å) | Clash overlap (Å) |
|------------------|------------------|--------------------------|-------------------|
| 3:M:66:PHE:HE2   | 3:M:77:LEU:O     | 1.77                     | 0.68              |
| 3:M:67:SER:HG    | 3:M:90:PHE:HD1   | 0.70                     | 0.68              |
| 3:M:101:LEU:CD1  | 3:M:109:LEU:HD13 | 2.22                     | 0.68              |
| 3:M:222:PHE:CD1  | 3:M:439:TYR:CE1  | 2.81                     | 0.68              |
| 3:M:244:VAL:N    | 3:M:300:LEU:O    | 2.27                     | 0.68              |
| 3:M:260:LEU:HA   | 3:M:448:TYR:O    | 1.93                     | 0.68              |
| 4:S:85:PHE:CZ    | 4:S:109:LEU:HD23 | 2.28                     | 0.68              |
| 4:S:111:ARG:CB   | 4:S:150:VAL:HG22 | 2.22                     | 0.68              |
| 1:A:96:SER:HA    | 1:A:127:LEU:HG   | 1.76                     | 0.68              |
| 1:A:170:LEU:HB3  | 1:A:206:LYS:CG   | 2.23                     | 0.68              |
| 1:A:566:PHE:CD1  | 1:A:570:LYS:HA   | 2.28                     | 0.68              |
| 2:B:47:LEU:HD22  | 2:B:66:ILE:CB    | 2.15                     | 0.68              |
| 2:B:176:ALA:C    | 2:B:178:ILE:N    | 2.44                     | 0.68              |
| 2:B:177:ILE:HD12 | 2:B:196:LEU:CD2  | 2.24                     | 0.68              |
| 2:B:219:TYR:HB2  | 2:B:226:LEU:HD22 | 1.73                     | 0.68              |
| 2:B:352:ASN:HB2  | 3:M:49:ASP:CG    | 2.12                     | 0.68              |
| 3:M:223:HIS:CD2  | 3:M:478:ASN:HA   | 2.27                     | 0.68              |
| 3:M:242:GLY:HA2  | 3:M:474:THR:CG2  | 2.22                     | 0.68              |
| 3:M:319:SER:O    | 3:M:343:ASN:O    | 2.12                     | 0.68              |
| 3:M:443:SER:HB3  | 3:M:447:ILE:CA   | 2.23                     | 0.68              |
| 4:S:50:PHE:HA    | 4:S:77:TYR:HD1   | 1.58                     | 0.68              |
| 1:A:79:MET:CG    | 1:A:112:GLN:OE1  | 2.40                     | 0.68              |
| 1:A:277:LYS:O    | 1:A:277:LYS:HG3  | 1.94                     | 0.68              |
| 1:A:303:MET:HG2  | 1:A:308:ASP:OD2  | 1.92                     | 0.68              |
| 1:A:441:TYR:HB3  | 1:A:444:VAL:HG23 | 1.75                     | 0.68              |
| 1:A:509:PRO:CB   | 1:A:547:VAL:CG2  | 2.67                     | 0.68              |
| 1:A:589:SER:CB   | 1:A:601:VAL:CG2  | 2.70                     | 0.68              |
| 2:B:2:VAL:HG21   | 3:M:58:ARG:HD2   | 1.75                     | 0.68              |
| 2:B:102:HIS:ND1  | 2:B:137:PHE:CB   | 2.52                     | 0.68              |
| 2:B:563:PHE:O    | 2:B:566:ALA:CB   | 2.42                     | 0.68              |
| 3:M:65:TYR:CG    | 3:M:86:PRO:HA    | 2.29                     | 0.68              |
| 3:M:224:VAL:HG22 | 3:M:306:LEU:HD12 | 1.73                     | 0.68              |
| 3:M:225:VAL:HB   | 3:M:237:THR:OG1  | 1.93                     | 0.68              |
| 1:A:105:VAL:HG21 | 4:S:167:ILE:CB   | 2.23                     | 0.68              |
| 1:A:178:ARG:HB3  | 1:A:214:VAL:CG1  | 2.23                     | 0.68              |
| 1:A:189:PHE:CD2  | 1:A:225:LEU:CD1  | 2.76                     | 0.68              |
| 1:A:192:TYR:CE2  | 1:A:194:GLU:HB2  | 2.28                     | 0.68              |
| 1:A:271:ARG:NH1  | 1:A:302:ASN:O    | 2.26                     | 0.68              |
| 1:A:461:CYS:HB2  | 1:A:469:LEU:CD2  | 2.23                     | 0.68              |
| 2:B:24:ALA:CB    | 2:B:35:TYR:CD2   | 2.68                     | 0.68              |
| 2:B:146:LYS:O    | 2:B:147:MET:CG   | 2.42                     | 0.68              |

*Continued on next page...*

*Continued from previous page...*

| Atom-1           | Atom-2           | Interatomic distance (Å) | Clash overlap (Å) |
|------------------|------------------|--------------------------|-------------------|
| 2:B:412:PHE:CE2  | 2:B:446:TRP:HB3  | 2.22                     | 0.68              |
| 2:B:422:ALA:CB   | 2:B:424:PHE:CD1  | 2.54                     | 0.68              |
| 2:B:512:VAL:HG21 | 2:B:548:ILE:CG1  | 2.22                     | 0.68              |
| 3:M:222:PHE:HB2  | 3:M:479:PHE:CE1  | 2.29                     | 0.68              |
| 4:S:105:PHE:HZ   | 4:S:128:LEU:HD11 | 1.58                     | 0.68              |
| 1:A:214:VAL:HG23 | 4:S:148:ARG:NH2  | 2.08                     | 0.68              |
| 1:A:240:LEU:O    | 1:A:241:TYR:O    | 2.11                     | 0.68              |
| 1:A:244:LEU:CD1  | 1:A:281:LEU:HD11 | 2.24                     | 0.68              |
| 1:A:482:ILE:HG12 | 1:A:517:TRP:HH2  | 1.58                     | 0.68              |
| 2:B:37:TYR:O     | 2:B:38:TYR:C     | 2.31                     | 0.68              |
| 2:B:90:ILE:HG13  | 2:B:98:LYS:HD3   | 1.74                     | 0.68              |
| 2:B:247:TYR:OH   | 3:M:91:THR:HG21  | 1.94                     | 0.68              |
| 2:B:334:MET:HE2  | 2:B:334:MET:CA   | 2.17                     | 0.68              |
| 2:B:361:GLN:HG2  | 2:B:394:TRP:CZ2  | 2.29                     | 0.68              |
| 2:B:433:VAL:O    | 2:B:474:VAL:HG11 | 1.93                     | 0.68              |
| 2:B:589:SER:HA   | 2:B:592:TYR:HD2  | 1.58                     | 0.68              |
| 3:M:306:LEU:HD22 | 3:M:317:MET:CE   | 2.23                     | 0.68              |
| 3:M:317:MET:CB   | 3:M:321:GLY:C    | 2.57                     | 0.68              |
| 1:A:605:GLU:CG   | 1:A:632:PHE:CE2  | 2.69                     | 0.68              |
| 2:B:37:TYR:CE2   | 2:B:46:GLN:NE2   | 2.48                     | 0.68              |
| 2:B:47:LEU:CD1   | 2:B:66:ILE:HA    | 2.23                     | 0.68              |
| 2:B:216:LYS:CG   | 2:B:251:LEU:CD1  | 2.47                     | 0.68              |
| 3:M:65:TYR:CD2   | 3:M:86:PRO:CA    | 2.76                     | 0.68              |
| 3:M:244:VAL:CG1  | 3:M:472:TYR:CZ   | 2.75                     | 0.68              |
| 3:M:246:VAL:HB   | 3:M:297:PHE:HZ   | 1.51                     | 0.68              |
| 3:M:339:GLU:CD   | 3:M:412:ARG:CD   | 2.60                     | 0.68              |
| 3:M:360:LEU:CD1  | 3:M:433:VAL:HB   | 2.23                     | 0.68              |
| 4:S:9:ASN:ND2    | 4:S:118:GLU:OE1  | 2.27                     | 0.68              |
| 1:A:102:GLN:N    | 4:S:167:ILE:CG1  | 2.55                     | 0.68              |
| 1:A:558:VAL:O    | 1:A:561:ASN:N    | 2.15                     | 0.68              |
| 2:B:20:ARG:CG    | 2:B:21:GLU:H     | 2.06                     | 0.68              |
| 2:B:42:ILE:O     | 2:B:46:GLN:CD    | 2.31                     | 0.68              |
| 2:B:140:SER:O    | 2:B:143:SER:N    | 2.21                     | 0.68              |
| 2:B:523:PHE:CD1  | 2:B:559:ASP:CG   | 2.67                     | 0.68              |
| 2:B:549:LEU:HD13 | 2:B:611:ALA:HB2  | 1.71                     | 0.68              |
| 3:M:10:THR:OG1   | 3:M:48:ASP:OD1   | 2.09                     | 0.68              |
| 3:M:101:LEU:CD2  | 3:M:106:LYS:HG3  | 2.24                     | 0.68              |
| 3:M:300:LEU:HD11 | 3:M:447:ILE:HD12 | 1.76                     | 0.68              |
| 4:S:8:PHE:CB     | 4:S:36:TYR:OH    | 2.41                     | 0.68              |
| 1:A:100:LEU:CD2  | 1:A:138:ASN:HB3  | 2.23                     | 0.68              |
| 1:A:189:PHE:CE2  | 1:A:225:LEU:HD11 | 2.28                     | 0.68              |

*Continued on next page...*

*Continued from previous page...*

| Atom-1           | Atom-2           | Interatomic distance (Å) | Clash overlap (Å) |
|------------------|------------------|--------------------------|-------------------|
| 1:A:401:VAL:CG1  | 1:A:419:ILE:HD12 | 2.23                     | 0.68              |
| 1:A:594:PHE:CD2  | 2:B:474:VAL:CG2  | 2.77                     | 0.68              |
| 2:B:144:ASP:HA   | 2:B:179:LYS:HD3  | 1.72                     | 0.68              |
| 2:B:380:LYS:HZ1  | 3:M:236:LEU:CD1  | 2.07                     | 0.68              |
| 1:A:102:GLN:HB3  | 4:S:166:LYS:CG   | 2.23                     | 0.67              |
| 1:A:212:ILE:HG22 | 1:A:247:ILE:HD13 | 1.75                     | 0.67              |
| 1:A:635:ALA:C    | 2:B:517:GLU:HA   | 2.15                     | 0.67              |
| 2:B:124:GLN:CA   | 2:B:157:THR:OG1  | 2.31                     | 0.67              |
| 2:B:148:SER:O    | 2:B:183:ALA:CB   | 2.36                     | 0.67              |
| 3:M:223:HIS:HB3  | 3:M:478:ASN:CA   | 2.24                     | 0.67              |
| 3:M:354:ASP:O    | 3:M:438:SER:O    | 2.12                     | 0.67              |
| 3:M:371:GLU:HB3  | 3:M:424:PHE:HD1  | 1.60                     | 0.67              |
| 4:S:14:PRO:O     | 4:S:15:ARG:CG    | 2.43                     | 0.67              |
| 4:S:130:SER:CB   | 4:S:156:LEU:CD1  | 2.65                     | 0.67              |
| 1:A:186:PHE:CD1  | 1:A:224:GLU:HB2  | 2.27                     | 0.67              |
| 1:A:186:PHE:CZ   | 4:S:138:GLY:N    | 2.29                     | 0.67              |
| 1:A:190:LEU:CD1  | 1:A:228:LYS:HE3  | 2.23                     | 0.67              |
| 1:A:318:ARG:O    | 1:A:322:PHE:HD1  | 1.76                     | 0.67              |
| 1:A:384:LEU:CG   | 1:A:441:TYR:HE2  | 2.06                     | 0.67              |
| 1:A:446:ASP:O    | 1:A:448:GLU:O    | 2.11                     | 0.67              |
| 2:B:67:ILE:HD13  | 2:B:103:LEU:HB2  | 1.76                     | 0.67              |
| 2:B:204:ASP:O    | 2:B:207:VAL:HB   | 1.94                     | 0.67              |
| 2:B:293:VAL:O    | 2:B:299:LEU:CG   | 2.42                     | 0.67              |
| 2:B:493:LEU:HD21 | 2:B:511:ILE:HG12 | 1.74                     | 0.67              |
| 3:M:269:ILE:O    | 3:M:302:TYR:CD1  | 2.47                     | 0.67              |
| 3:M:281:GLY:O    | 3:M:282:VAL:CB   | 2.42                     | 0.67              |
| 3:M:304:VAL:HG21 | 3:M:309:GLN:NE2  | 2.09                     | 0.67              |
| 4:S:94:SER:O     | 4:S:98:ILE:HG12  | 1.94                     | 0.67              |
| 1:A:70:ALA:O     | 1:A:74:LEU:HG    | 1.94                     | 0.67              |
| 1:A:137:ASN:O    | 1:A:139:ASP:N    | 2.26                     | 0.67              |
| 1:A:292:TYR:CD1  | 1:A:292:TYR:O    | 2.48                     | 0.67              |
| 1:A:409:VAL:O    | 1:A:409:VAL:HG13 | 1.93                     | 0.67              |
| 1:A:572:PHE:O    | 1:A:575:LYS:HB3  | 1.93                     | 0.67              |
| 1:A:585:PHE:CE2  | 1:A:603:VAL:CG1  | 2.77                     | 0.67              |
| 2:B:94:ASP:O     | 2:B:134:LEU:HD21 | 1.94                     | 0.67              |
| 3:M:66:PHE:CB    | 3:M:77:LEU:CD2   | 2.64                     | 0.67              |
| 3:M:215:TYR:HB2  | 3:M:468:LYS:N    | 2.09                     | 0.67              |
| 3:M:222:PHE:CA   | 3:M:479:PHE:CZ   | 2.76                     | 0.67              |
| 4:S:9:ASN:CG     | 4:S:13:GLN:HB2   | 2.14                     | 0.67              |
| 4:S:47:GLN:OE1   | 4:S:78:LYS:C     | 2.32                     | 0.67              |
| 1:A:189:PHE:HD2  | 1:A:225:LEU:CD1  | 2.06                     | 0.67              |

*Continued on next page...*

*Continued from previous page...*

| Atom-1           | Atom-2           | Interatomic distance (Å) | Clash overlap (Å) |
|------------------|------------------|--------------------------|-------------------|
| 1:A:249:ASN:HD21 | 4:S:146:VAL:HG23 | 1.58                     | 0.67              |
| 1:A:282:MET:O    | 1:A:284:SER:N    | 2.28                     | 0.67              |
| 1:A:429:VAL:HG11 | 1:A:469:LEU:HD11 | 1.77                     | 0.67              |
| 1:A:465:SER:N    | 2:B:1:MET:HG2    | 2.09                     | 0.67              |
| 2:B:92:THR:O     | 2:B:134:LEU:HD13 | 1.93                     | 0.67              |
| 2:B:173:VAL:HB   | 2:B:199:LEU:HD13 | 1.75                     | 0.67              |
| 2:B:215:TYR:HE2  | 2:B:229:HIS:ND1  | 1.90                     | 0.67              |
| 2:B:216:LYS:HD3  | 2:B:251:LEU:HB2  | 1.77                     | 0.67              |
| 3:M:96:ILE:HG23  | 3:M:125:PHE:CE1  | 2.30                     | 0.67              |
| 3:M:245:ASP:HA   | 3:M:297:PHE:O    | 1.94                     | 0.67              |
| 1:A:448:GLU:CB   | 1:A:487:MET:SD   | 2.78                     | 0.67              |
| 2:B:226:LEU:O    | 2:B:229:HIS:HB2  | 1.95                     | 0.67              |
| 2:B:260:LEU:CB   | 2:B:291:TYR:CZ   | 2.73                     | 0.67              |
| 2:B:309:LEU:CD1  | 2:B:317:VAL:HG11 | 2.24                     | 0.67              |
| 2:B:380:LYS:NZ   | 3:M:236:LEU:CD1  | 2.58                     | 0.67              |
| 3:M:253:ASN:HA   | 3:M:292:PRO:HG2  | 1.75                     | 0.67              |
| 1:A:99:LYS:HZ2   | 4:S:164:ASP:CB   | 2.05                     | 0.67              |
| 1:A:103:LYS:NZ   | 1:A:131:ASP:HB2  | 2.08                     | 0.67              |
| 1:A:105:VAL:HG23 | 4:S:167:ILE:HD12 | 0.68                     | 0.67              |
| 1:A:189:PHE:CB   | 1:A:225:LEU:HD21 | 2.24                     | 0.67              |
| 1:A:212:ILE:O    | 1:A:213:SER:C    | 2.21                     | 0.67              |
| 1:A:392:MET:SD   | 1:A:457:LEU:HD21 | 2.34                     | 0.67              |
| 2:B:4:SER:O      | 2:B:8:ILE:CD1    | 2.43                     | 0.67              |
| 2:B:123:LEU:HB3  | 2:B:142:LEU:HD11 | 1.76                     | 0.67              |
| 3:M:375:LYS:HG3  | 3:M:418:GLU:OE1  | 1.95                     | 0.67              |
| 1:A:100:LEU:H    | 4:S:162:SER:CA   | 2.00                     | 0.67              |
| 1:A:104:ARG:CD   | 1:A:145:ILE:HG13 | 2.25                     | 0.67              |
| 1:A:140:VAL:CA   | 1:A:177:ILE:HD11 | 2.22                     | 0.67              |
| 1:A:145:ILE:HD11 | 4:S:156:LEU:HD13 | 1.77                     | 0.67              |
| 1:A:594:PHE:HB2  | 2:B:473:ASN:HB2  | 1.71                     | 0.67              |
| 2:B:47:LEU:CG    | 2:B:66:ILE:HG12  | 2.25                     | 0.67              |
| 3:M:327:PHE:CE1  | 3:M:336:ASP:CB   | 2.69                     | 0.67              |
| 1:A:125:THR:O    | 1:A:127:LEU:N    | 2.27                     | 0.67              |
| 1:A:320:HIS:CB   | 1:A:352:PHE:HE2  | 2.05                     | 0.67              |
| 1:A:401:VAL:HB   | 1:A:419:ILE:CG1  | 2.24                     | 0.67              |
| 1:A:552:ILE:HD13 | 1:A:600:SER:CB   | 2.25                     | 0.67              |
| 1:A:625:LEU:CG   | 2:B:613:MET:SD   | 2.79                     | 0.67              |
| 2:B:175:LEU:CA   | 2:B:214:ALA:HB2  | 2.19                     | 0.67              |
| 2:B:208:ILE:HG21 | 2:B:236:ILE:HG21 | 1.77                     | 0.67              |
| 2:B:315:PRO:HA   | 2:B:318:ILE:HD12 | 1.76                     | 0.67              |
| 2:B:613:MET:CE   | 2:B:617:LEU:HD11 | 2.25                     | 0.67              |

*Continued on next page...*

*Continued from previous page...*

| Atom-1           | Atom-2           | Interatomic distance (Å) | Clash overlap (Å) |
|------------------|------------------|--------------------------|-------------------|
| 3:M:2:TYR:CE1    | 3:M:64:LYS:NZ    | 2.57                     | 0.67              |
| 3:M:2:TYR:CA     | 3:M:81:SER:HB2   | 2.25                     | 0.67              |
| 1:A:100:LEU:O    | 1:A:101:GLN:O    | 2.13                     | 0.67              |
| 1:A:264:SER:HB3  | 1:A:271:ARG:HG2  | 1.75                     | 0.67              |
| 2:B:37:TYR:HD2   | 2:B:38:TYR:CE1   | 2.01                     | 0.67              |
| 2:B:120:ILE:HD12 | 2:B:142:LEU:CD2  | 2.24                     | 0.67              |
| 2:B:139:LEU:HD23 | 2:B:172:GLU:C    | 2.15                     | 0.67              |
| 2:B:560:ILE:HG22 | 2:B:561:ASP:N    | 2.10                     | 0.67              |
| 3:M:7:ILE:C      | 3:M:75:TRP:O     | 2.32                     | 0.67              |
| 4:S:53:THR:CB    | 4:S:69:ASN:CB    | 2.73                     | 0.67              |
| 1:A:109:ALA:O    | 1:A:112:GLN:N    | 2.27                     | 0.67              |
| 1:A:140:VAL:CG2  | 1:A:177:ILE:CG1  | 2.68                     | 0.67              |
| 1:A:182:ILE:CG2  | 1:A:221:VAL:HG23 | 2.17                     | 0.67              |
| 1:A:370:LYS:O    | 1:A:374:LEU:CD1  | 2.42                     | 0.67              |
| 1:A:421:PRO:CG   | 1:A:424:TYR:CD1  | 2.76                     | 0.67              |
| 1:A:478:ARG:HD3  | 1:A:514:GLU:OE1  | 1.95                     | 0.67              |
| 1:A:556:VAL:CG2  | 1:A:603:VAL:CG1  | 2.73                     | 0.67              |
| 1:A:637:GLU:CB   | 2:B:551:LEU:HD22 | 2.25                     | 0.67              |
| 2:B:219:TYR:CA   | 2:B:223:LEU:HD23 | 2.24                     | 0.67              |
| 2:B:340:ILE:CD1  | 2:B:366:LEU:CB   | 2.73                     | 0.67              |
| 3:M:54:SER:HB2   | 3:M:66:PHE:CD1   | 2.30                     | 0.67              |
| 3:M:222:PHE:CD2  | 3:M:439:TYR:CE1  | 2.82                     | 0.67              |
| 3:M:233:LEU:CD2  | 3:M:323:MET:O    | 2.42                     | 0.67              |
| 3:M:338:PHE:CD2  | 3:M:415:ILE:CD1  | 2.78                     | 0.67              |
| 1:A:186:PHE:CD2  | 1:A:187:LYS:N    | 2.63                     | 0.66              |
| 2:B:20:ARG:HD2   | 2:B:21:GLU:N     | 2.09                     | 0.66              |
| 2:B:80:GLN:CG    | 2:B:115:LEU:HD21 | 2.25                     | 0.66              |
| 2:B:195:ILE:C    | 2:B:197:LYS:N    | 2.43                     | 0.66              |
| 2:B:277:CYS:HA   | 2:B:292:GLU:CG   | 2.25                     | 0.66              |
| 2:B:303:LEU:HD11 | 2:B:333:GLN:HE21 | 1.58                     | 0.66              |
| 2:B:347:VAL:HG22 | 2:B:359:LEU:CB   | 2.13                     | 0.66              |
| 2:B:381:PHE:O    | 2:B:395:LYS:HD2  | 1.95                     | 0.66              |
| 2:B:537:PHE:CE1  | 2:B:545:ARG:CG   | 2.75                     | 0.66              |
| 3:M:3:LEU:HD12   | 3:M:3:LEU:N      | 2.10                     | 0.66              |
| 3:M:215:TYR:HB3  | 3:M:470:ALA:H    | 1.60                     | 0.66              |
| 4:S:9:ASN:HD21   | 4:S:13:GLN:CB    | 2.09                     | 0.66              |
| 4:S:99:LEU:O     | 4:S:102:ILE:HB   | 1.95                     | 0.66              |
| 1:A:104:ARG:HG3  | 1:A:145:ILE:CG2  | 2.25                     | 0.66              |
| 1:A:214:VAL:HG23 | 4:S:148:ARG:CZ   | 2.26                     | 0.66              |
| 1:A:557:LYS:HE3  | 2:B:606:ASP:HB3  | 1.78                     | 0.66              |
| 1:A:566:PHE:HZ   | 1:A:618:THR:C    | 1.99                     | 0.66              |

*Continued on next page...*



*Continued from previous page...*

| Atom-1           | Atom-2           | Interatomic distance (Å) | Clash overlap (Å) |
|------------------|------------------|--------------------------|-------------------|
| 1:A:605:GLU:OE2  | 1:A:608:ARG:NH2  | 2.25                     | 0.66              |
| 2:B:13:ASP:OD2   | 3:M:17:GLN:OE1   | 2.14                     | 0.66              |
| 2:B:120:ILE:HD13 | 2:B:142:LEU:CD2  | 2.22                     | 0.66              |
| 2:B:175:LEU:CD1  | 2:B:210:CYS:HB3  | 2.25                     | 0.66              |
| 2:B:249:ILE:HG21 | 2:B:320:SER:HB3  | 1.76                     | 0.66              |
| 2:B:363:ILE:CG2  | 2:B:398:ILE:CD1  | 2.73                     | 0.66              |
| 2:B:364:HIS:O    | 2:B:367:SER:N    | 2.28                     | 0.66              |
| 2:B:375:LEU:HD23 | 2:B:402:LEU:HD22 | 1.78                     | 0.66              |
| 3:M:269:ILE:C    | 3:M:302:TYR:CE1  | 2.68                     | 0.66              |
| 3:M:324:SER:O    | 3:M:339:GLU:O    | 2.13                     | 0.66              |
| 3:M:340:LEU:N    | 3:M:411:LEU:O    | 2.28                     | 0.66              |
| 3:M:443:SER:CB   | 3:M:447:ILE:CG1  | 2.37                     | 0.66              |
| 4:S:14:PRO:O     | 4:S:15:ARG:HG2   | 1.95                     | 0.66              |
| 1:A:429:VAL:CG1  | 1:A:469:LEU:CD1  | 2.69                     | 0.66              |
| 2:B:343:LEU:CD1  | 2:B:359:LEU:HD12 | 2.18                     | 0.66              |
| 2:B:363:ILE:HG21 | 2:B:398:ILE:HD11 | 1.77                     | 0.66              |
| 2:B:534:ILE:HD13 | 2:B:594:ALA:CB   | 2.20                     | 0.66              |
| 3:M:410:VAL:CG1  | 3:M:412:ARG:HH11 | 2.08                     | 0.66              |
| 3:M:437:TYR:CD1  | 3:M:479:PHE:CZ   | 2.83                     | 0.66              |
| 1:A:103:LYS:O    | 1:A:107:TYR:HD1  | 1.74                     | 0.66              |
| 1:A:219:VAL:O    | 4:S:140:MET:SD   | 2.52                     | 0.66              |
| 1:A:244:LEU:CD1  | 1:A:256:LEU:HD12 | 2.25                     | 0.66              |
| 1:A:625:LEU:HG   | 2:B:613:MET:SD   | 2.35                     | 0.66              |
| 2:B:77:ILE:O     | 2:B:79:VAL:CA    | 2.43                     | 0.66              |
| 2:B:124:GLN:HB2  | 2:B:153:ILE:CG2  | 2.24                     | 0.66              |
| 2:B:127:LEU:HD12 | 2:B:157:THR:OG1  | 1.96                     | 0.66              |
| 2:B:472:VAL:O    | 2:B:473:ASN:C    | 2.33                     | 0.66              |
| 2:B:512:VAL:CG1  | 2:B:548:ILE:HA   | 2.10                     | 0.66              |
| 3:M:396:GLN:HG2  | 3:M:398:ILE:HD11 | 1.77                     | 0.66              |
| 4:S:85:PHE:HE2   | 4:S:109:LEU:CD2  | 2.08                     | 0.66              |
| 1:A:64:LEU:HB3   | 1:A:102:GLN:NE2  | 2.10                     | 0.66              |
| 1:A:370:LYS:HE2  | 1:A:370:LYS:HA   | 1.76                     | 0.66              |
| 1:A:581:LEU:HB3  | 1:A:607:LEU:HD13 | 1.77                     | 0.66              |
| 1:A:631:SER:O    | 2:B:554:LYS:CG   | 2.35                     | 0.66              |
| 2:B:85:ASP:O     | 2:B:89:ASN:ND2   | 2.28                     | 0.66              |
| 2:B:173:VAL:HB   | 2:B:199:LEU:HD11 | 1.76                     | 0.66              |
| 2:B:174:ALA:HB3  | 2:B:211:ALA:CB   | 2.22                     | 0.66              |
| 2:B:204:ASP:HB3  | 2:B:207:VAL:CG2  | 2.25                     | 0.66              |
| 2:B:208:ILE:HG21 | 2:B:236:ILE:CG2  | 2.25                     | 0.66              |
| 2:B:344:VAL:HG22 | 2:B:381:PHE:HZ   | 1.61                     | 0.66              |
| 2:B:553:ALA:HA   | 2:B:614:ILE:HG23 | 1.78                     | 0.66              |

*Continued on next page...*

*Continued from previous page...*

| Atom-1           | Atom-2           | Interatomic distance (Å) | Clash overlap (Å) |
|------------------|------------------|--------------------------|-------------------|
| 3:M:8:THR:HA     | 3:M:13:LYS:O     | 1.95                     | 0.66              |
| 3:M:220:GLU:HB2  | 3:M:222:PHE:HE1  | 1.60                     | 0.66              |
| 4:S:130:SER:HB2  | 4:S:156:LEU:HD13 | 1.76                     | 0.66              |
| 1:A:516:ILE:CG1  | 1:A:551:LEU:HD13 | 2.26                     | 0.66              |
| 1:A:557:LYS:CD   | 2:B:606:ASP:N    | 2.56                     | 0.66              |
| 1:A:629:LEU:HG   | 2:B:610:ARG:NH1  | 2.05                     | 0.66              |
| 2:B:90:ILE:CD1   | 2:B:123:LEU:HD21 | 2.24                     | 0.66              |
| 2:B:94:ASP:C     | 2:B:134:LEU:HD21 | 2.16                     | 0.66              |
| 2:B:139:LEU:CD2  | 2:B:173:VAL:O    | 2.32                     | 0.66              |
| 2:B:315:PRO:HG3  | 2:B:352:ASN:OD1  | 1.94                     | 0.66              |
| 3:M:437:TYR:N    | 3:M:437:TYR:HD1  | 1.91                     | 0.66              |
| 4:S:110:ASP:O    | 4:S:113:PHE:O    | 2.14                     | 0.66              |
| 1:A:221:VAL:HG23 | 4:S:142:ILE:HG21 | 1.77                     | 0.66              |
| 1:A:241:TYR:CD2  | 1:A:242:GLU:N    | 2.63                     | 0.66              |
| 1:A:399:ASP:O    | 1:A:420:ILE:CB   | 2.43                     | 0.66              |
| 1:A:454:ILE:HG23 | 1:A:473:ILE:CG2  | 2.24                     | 0.66              |
| 1:A:626:SER:C    | 2:B:617:LEU:CG   | 2.35                     | 0.66              |
| 2:B:123:LEU:CD2  | 2:B:138:ALA:O    | 2.42                     | 0.66              |
| 2:B:230:PHE:CD2  | 2:B:298:ASP:O    | 2.48                     | 0.66              |
| 2:B:232:ARG:CG   | 2:B:236:ILE:HD11 | 2.26                     | 0.66              |
| 2:B:234:CYS:O    | 2:B:237:ILE:CG2  | 2.38                     | 0.66              |
| 2:B:437:SER:C    | 2:B:478:LEU:HD21 | 2.15                     | 0.66              |
| 3:M:51:LEU:N     | 3:M:51:LEU:HD12  | 2.10                     | 0.66              |
| 3:M:379:LEU:HD23 | 3:M:397:TRP:HE1  | 1.58                     | 0.66              |
| 1:A:92:LEU:HD11  | 1:A:120:ILE:CA   | 2.13                     | 0.66              |
| 1:A:401:VAL:CG2  | 1:A:419:ILE:HB   | 2.26                     | 0.66              |
| 1:A:509:PRO:HB3  | 1:A:547:VAL:HG21 | 1.75                     | 0.66              |
| 1:A:581:LEU:CD2  | 1:A:607:LEU:HD11 | 2.26                     | 0.66              |
| 2:B:353:GLN:HG2  | 3:M:48:ASP:CA    | 2.26                     | 0.66              |
| 2:B:375:LEU:O    | 2:B:376:PRO:C    | 2.33                     | 0.66              |
| 2:B:403:ILE:HA   | 2:B:411:ILE:HD12 | 1.77                     | 0.66              |
| 2:B:537:PHE:CG   | 2:B:598:LEU:CB   | 2.74                     | 0.66              |
| 2:B:556:LEU:CA   | 2:B:588:ILE:CD1  | 2.21                     | 0.66              |
| 2:B:563:PHE:HE2  | 2:B:584:SER:CA   | 2.06                     | 0.66              |
| 3:M:259:LYS:O    | 3:M:449:VAL:HG13 | 1.96                     | 0.66              |
| 4:S:48:SER:HA    | 4:S:77:TYR:CB    | 2.25                     | 0.66              |
| 4:S:54:PRO:HB2   | 4:S:57:LEU:CD1   | 2.26                     | 0.66              |
| 4:S:137:GLN:O    | 4:S:140:MET:HB3  | 1.96                     | 0.66              |
| 1:A:92:LEU:O     | 1:A:95:MET:N     | 2.27                     | 0.66              |
| 1:A:100:LEU:O    | 1:A:101:GLN:C    | 2.16                     | 0.66              |
| 1:A:102:GLN:CA   | 4:S:166:LYS:HB2  | 2.26                     | 0.66              |

*Continued on next page...*

*Continued from previous page...*

| Atom-1           | Atom-2           | Interatomic distance (Å) | Clash overlap (Å) |
|------------------|------------------|--------------------------|-------------------|
| 1:A:150:LEU:HD22 | 1:A:162:ILE:CG1  | 2.26                     | 0.66              |
| 1:A:288:THR:HB   | 1:A:322:PHE:HZ   | 1.59                     | 0.66              |
| 1:A:318:ARG:O    | 1:A:322:PHE:CD1  | 2.49                     | 0.66              |
| 1:A:625:LEU:O    | 1:A:627:GLU:N    | 2.28                     | 0.66              |
| 2:B:215:TYR:HD2  | 2:B:226:LEU:HD13 | 1.60                     | 0.66              |
| 2:B:400:SER:HB3  | 2:B:439:CYS:SG   | 2.35                     | 0.66              |
| 3:M:215:TYR:HD2  | 3:M:469:GLY:H    | 1.29                     | 0.66              |
| 3:M:265:ASN:HB3  | 3:M:309:GLN:HG3  | 1.77                     | 0.66              |
| 1:A:92:LEU:HD22  | 1:A:123:LEU:HB2  | 1.78                     | 0.66              |
| 1:A:215:VAL:O    | 1:A:219:VAL:HG23 | 1.95                     | 0.66              |
| 2:B:141:ALA:O    | 2:B:142:LEU:C    | 2.31                     | 0.66              |
| 2:B:390:VAL:HG12 | 2:B:394:TRP:CD1  | 2.31                     | 0.66              |
| 2:B:418:TYR:CD1  | 2:B:419:VAL:CA   | 2.79                     | 0.66              |
| 2:B:497:LEU:HD21 | 2:B:533:LEU:HD22 | 1.77                     | 0.66              |
| 2:B:592:TYR:CE2  | 2:B:618:PHE:HD2  | 2.13                     | 0.66              |
| 3:M:2:TYR:H      | 3:M:81:SER:CB    | 2.03                     | 0.66              |
| 3:M:100:LEU:CD1  | 3:M:100:LEU:H    | 2.09                     | 0.66              |
| 3:M:258:VAL:HG13 | 3:M:452:ILE:HG13 | 1.77                     | 0.66              |
| 3:M:272:LEU:HD21 | 3:M:288:ILE:HD13 | 1.76                     | 0.66              |
| 3:M:435:LEU:O    | 3:M:479:PHE:CE2  | 2.49                     | 0.66              |
| 4:S:57:LEU:N     | 4:S:57:LEU:HD12  | 2.11                     | 0.66              |
| 1:A:323:CYS:CB   | 1:A:355:LEU:HD21 | 2.26                     | 0.65              |
| 2:B:123:LEU:HD13 | 2:B:142:LEU:HG   | 0.67                     | 0.65              |
| 2:B:530:LEU:HD23 | 2:B:591:MET:HB2  | 1.78                     | 0.65              |
| 3:M:213:GLU:C    | 3:M:467:TYR:HB2  | 2.16                     | 0.65              |
| 3:M:360:LEU:HD13 | 3:M:433:VAL:CG2  | 2.26                     | 0.65              |
| 1:A:520:GLY:HA2  | 1:A:558:VAL:CG2  | 2.23                     | 0.65              |
| 2:B:67:ILE:HD11  | 2:B:100:LEU:O    | 1.95                     | 0.65              |
| 2:B:103:LEU:CD1  | 3:M:132:GLY:HA3  | 2.24                     | 0.65              |
| 2:B:120:ILE:HD11 | 2:B:150:LEU:HD13 | 1.77                     | 0.65              |
| 2:B:175:LEU:CD2  | 2:B:210:CYS:C    | 2.64                     | 0.65              |
| 2:B:336:ASN:HB3  | 2:B:339:PHE:CD1  | 2.32                     | 0.65              |
| 3:M:2:TYR:CE2    | 3:M:62:VAL:HG13  | 2.31                     | 0.65              |
| 3:M:302:TYR:HE2  | 3:M:304:VAL:HB   | 1.61                     | 0.65              |
| 3:M:403:THR:HG23 | 3:M:407:THR:HG1  | 1.62                     | 0.65              |
| 3:M:437:TYR:CE1  | 3:M:479:PHE:CE1  | 2.85                     | 0.65              |
| 1:A:225:LEU:HB2  | 1:A:233:PHE:CZ   | 2.31                     | 0.65              |
| 1:A:253:ILE:HG21 | 1:A:281:LEU:HB3  | 1.76                     | 0.65              |
| 1:A:264:SER:HB2  | 1:A:271:ARG:CG   | 2.24                     | 0.65              |
| 1:A:557:LYS:O    | 2:B:605:PHE:CE2  | 2.45                     | 0.65              |
| 1:A:557:LYS:HG2  | 2:B:606:ASP:HA   | 1.76                     | 0.65              |

*Continued on next page...*

*Continued from previous page...*

| Atom-1           | Atom-2           | Interatomic distance (Å) | Clash overlap (Å) |
|------------------|------------------|--------------------------|-------------------|
| 1:A:609:LEU:O    | 1:A:612:GLU:N    | 2.29                     | 0.65              |
| 2:B:123:LEU:HD22 | 2:B:138:ALA:CA   | 2.27                     | 0.65              |
| 2:B:208:ILE:CG1  | 2:B:236:ILE:HD13 | 2.19                     | 0.65              |
| 2:B:212:VAL:CG1  | 2:B:248:LEU:HD23 | 2.26                     | 0.65              |
| 2:B:252:LEU:HD13 | 2:B:302:PHE:CG   | 2.14                     | 0.65              |
| 2:B:331:PRO:HB3  | 2:B:369:LEU:CD1  | 2.27                     | 0.65              |
| 2:B:334:MET:HE2  | 2:B:339:PHE:CD1  | 2.31                     | 0.65              |
| 2:B:346:THR:O    | 2:B:349:MET:N    | 2.29                     | 0.65              |
| 2:B:353:GLN:HG2  | 3:M:48:ASP:C     | 2.17                     | 0.65              |
| 2:B:447:GLU:OE1  | 2:B:485:LYS:CG   | 2.41                     | 0.65              |
| 2:B:545:ARG:HD2  | 2:B:602:ASP:CG   | 2.17                     | 0.65              |
| 2:B:549:LEU:HD22 | 2:B:607:ILE:O    | 1.96                     | 0.65              |
| 3:M:55:MET:O     | 3:M:57:GLY:N     | 2.30                     | 0.65              |
| 3:M:229:LYS:HG2  | 3:M:230:LYS:HG3  | 1.79                     | 0.65              |
| 3:M:379:LEU:HD12 | 3:M:379:LEU:N    | 2.10                     | 0.65              |
| 4:S:108:SER:CB   | 4:S:149:ILE:CG2  | 2.73                     | 0.65              |
| 1:A:132:LEU:CD2  | 1:A:169:MET:CG   | 2.62                     | 0.65              |
| 1:A:170:LEU:HB3  | 1:A:206:LYS:HG3  | 1.77                     | 0.65              |
| 1:A:557:LYS:CG   | 2:B:606:ASP:HB2  | 2.25                     | 0.65              |
| 2:B:211:ALA:C    | 2:B:233:TYR:CZ   | 2.52                     | 0.65              |
| 2:B:223:LEU:HD11 | 2:B:259:TYR:N    | 1.90                     | 0.65              |
| 2:B:340:ILE:HD13 | 2:B:366:LEU:CD1  | 2.18                     | 0.65              |
| 2:B:438:ARG:HA   | 2:B:441:GLN:NE2  | 2.11                     | 0.65              |
| 3:M:214:LEU:CD1  | 3:M:256:VAL:CG2  | 2.74                     | 0.65              |
| 3:M:241:HIS:HD2  | 3:M:475:GLN:H    | 1.42                     | 0.65              |
| 3:M:340:LEU:CB   | 3:M:411:LEU:HG   | 2.14                     | 0.65              |
| 4:S:24:ASP:OD2   | 4:S:27:LYS:HD2   | 1.96                     | 0.65              |
| 1:A:128:LEU:HD13 | 1:A:150:LEU:HD21 | 1.22                     | 0.65              |
| 1:A:189:PHE:HB2  | 1:A:225:LEU:CD2  | 2.26                     | 0.65              |
| 1:A:485:PRO:O    | 1:A:488:ARG:CG   | 2.43                     | 0.65              |
| 1:A:638:LEU:O    | 2:B:486:HIS:CE1  | 2.50                     | 0.65              |
| 2:B:90:ILE:CG1   | 2:B:98:LYS:HD3   | 2.27                     | 0.65              |
| 2:B:178:ILE:CG2  | 2:B:214:ALA:C    | 2.64                     | 0.65              |
| 2:B:274:PRO:N    | 2:B:295:ASN:ND2  | 2.44                     | 0.65              |
| 3:M:66:PHE:CB    | 3:M:77:LEU:HD21  | 2.03                     | 0.65              |
| 3:M:242:GLY:HA3  | 3:M:444:ALA:CB   | 2.25                     | 0.65              |
| 1:A:67:LYS:CB    | 4:S:166:LYS:HA   | 2.27                     | 0.65              |
| 1:A:78:GLU:O     | 1:A:80:TYR:O     | 2.13                     | 0.65              |
| 1:A:88:ASN:HB2   | 1:A:120:ILE:HD12 | 1.73                     | 0.65              |
| 1:A:105:VAL:HG23 | 4:S:167:ILE:CB   | 2.26                     | 0.65              |
| 1:A:211:ASP:OD2  | 4:S:148:ARG:CD   | 2.43                     | 0.65              |

*Continued on next page...*

*Continued from previous page...*

| Atom-1           | Atom-2           | Interatomic distance (Å) | Clash overlap (Å) |
|------------------|------------------|--------------------------|-------------------|
| 1:A:416:ILE:HG22 | 1:A:417:PRO:O    | 1.96                     | 0.65              |
| 1:A:420:ILE:HG23 | 1:A:421:PRO:HD2  | 1.77                     | 0.65              |
| 1:A:638:LEU:O    | 2:B:518:ILE:CD1  | 2.44                     | 0.65              |
| 2:B:5:ILE:CA     | 2:B:8:ILE:HD12   | 2.26                     | 0.65              |
| 2:B:67:ILE:HD13  | 2:B:103:LEU:HB3  | 1.77                     | 0.65              |
| 2:B:159:LYS:HE3  | 2:B:191:GLU:CD   | 2.16                     | 0.65              |
| 2:B:178:ILE:CG2  | 2:B:214:ALA:HA   | 2.24                     | 0.65              |
| 2:B:479:VAL:HG21 | 2:B:486:HIS:NE2  | 2.11                     | 0.65              |
| 2:B:490:ILE:CG1  | 2:B:518:ILE:HG21 | 2.23                     | 0.65              |
| 4:S:105:PHE:HZ   | 4:S:128:LEU:CD1  | 2.08                     | 0.65              |
| 1:A:103:LYS:HE3  | 1:A:131:ASP:CG   | 2.05                     | 0.65              |
| 1:A:412:LYS:O    | 1:A:413:SER:C    | 2.31                     | 0.65              |
| 1:A:530:ASN:OD1  | 1:A:577:VAL:HG21 | 1.96                     | 0.65              |
| 2:B:177:ILE:HG22 | 2:B:196:LEU:HD11 | 1.79                     | 0.65              |
| 2:B:277:CYS:HA   | 2:B:292:GLU:HA   | 1.77                     | 0.65              |
| 2:B:351:GLU:O    | 3:M:48:ASP:CB    | 2.42                     | 0.65              |
| 2:B:430:ILE:HG23 | 2:B:470:ALA:HB2  | 1.78                     | 0.65              |
| 3:M:5:PHE:HB2    | 3:M:125:PHE:CE2  | 2.31                     | 0.65              |
| 3:M:216:VAL:O    | 3:M:216:VAL:HG23 | 1.96                     | 0.65              |
| 3:M:222:PHE:CE1  | 3:M:240:ILE:HG21 | 2.32                     | 0.65              |
| 3:M:327:PHE:CE1  | 3:M:336:ASP:OD2  | 2.49                     | 0.65              |
| 3:M:433:VAL:HG13 | 3:M:433:VAL:O    | 1.97                     | 0.65              |
| 2:B:105:LEU:CB   | 2:B:145:MET:CE   | 2.65                     | 0.65              |
| 2:B:178:ILE:CG2  | 2:B:179:LYS:N    | 2.51                     | 0.65              |
| 2:B:435:SER:O    | 2:B:438:ARG:N    | 2.19                     | 0.65              |
| 2:B:575:ASN:C    | 2:B:576:GLN:O    | 2.26                     | 0.65              |
| 1:A:196:LEU:HD22 | 1:A:196:LEU:C    | 2.15                     | 0.65              |
| 1:A:220:SER:HB2  | 4:S:142:ILE:HA   | 1.79                     | 0.65              |
| 1:A:291:ILE:N    | 1:A:291:ILE:HD12 | 2.12                     | 0.65              |
| 1:A:364:ASP:HB3  | 1:A:367:ILE:HD12 | 1.79                     | 0.65              |
| 1:A:384:LEU:HD21 | 1:A:441:TYR:CE2  | 2.28                     | 0.65              |
| 1:A:480:LEU:C    | 1:A:480:LEU:HD13 | 2.17                     | 0.65              |
| 1:A:570:LYS:O    | 1:A:571:ARG:HB2  | 1.97                     | 0.65              |
| 2:B:37:TYR:HH    | 2:B:46:GLN:HE21  | 0.83                     | 0.65              |
| 2:B:158:VAL:HG13 | 2:B:177:ILE:CD1  | 2.19                     | 0.65              |
| 2:B:196:LEU:HB3  | 2:B:229:HIS:ND1  | 2.10                     | 0.65              |
| 2:B:567:GLN:HG2  | 2:B:569:THR:OG1  | 1.97                     | 0.65              |
| 3:M:54:SER:HB2   | 3:M:66:PHE:HD1   | 1.62                     | 0.65              |
| 3:M:101:LEU:HG   | 3:M:106:LYS:CG   | 2.26                     | 0.65              |
| 3:M:271:SER:HB3  | 3:M:301:GLU:HG3  | 1.79                     | 0.65              |
| 3:M:316:ARG:O    | 3:M:317:MET:C    | 2.34                     | 0.65              |

*Continued on next page...*

*Continued from previous page...*

| Atom-1           | Atom-2           | Interatomic distance (Å) | Clash overlap (Å) |
|------------------|------------------|--------------------------|-------------------|
| 3:M:319:SER:HB2  | 3:M:347:PHE:N    | 2.11                     | 0.65              |
| 1:A:97:SER:H     | 4:S:166:LYS:HZ1  | 1.45                     | 0.65              |
| 1:A:104:ARG:NE   | 4:S:160:ALA:HB2  | 2.11                     | 0.65              |
| 1:A:136:GLY:O    | 1:A:137:ASN:C    | 2.27                     | 0.65              |
| 2:B:50:LEU:HB3   | 2:B:62:ALA:CB    | 2.23                     | 0.65              |
| 2:B:50:LEU:CG    | 2:B:62:ALA:HB2   | 2.27                     | 0.65              |
| 2:B:141:ALA:C    | 2:B:143:SER:N    | 2.46                     | 0.65              |
| 2:B:350:THR:CB   | 2:B:352:ASN:HD21 | 2.10                     | 0.65              |
| 3:M:224:VAL:HB   | 3:M:226:PHE:CE1  | 2.32                     | 0.65              |
| 3:M:244:VAL:HG13 | 3:M:472:TYR:HE2  | 1.50                     | 0.65              |
| 1:A:185:LEU:HB3  | 1:A:189:PHE:CE2  | 2.32                     | 0.64              |
| 1:A:638:LEU:HD13 | 2:B:515:PHE:O    | 1.98                     | 0.64              |
| 2:B:73:ASP:OD1   | 2:B:111:ASN:ND2  | 2.28                     | 0.64              |
| 2:B:157:THR:O    | 2:B:159:LYS:N    | 2.30                     | 0.64              |
| 2:B:227:HIS:CE1  | 2:B:292:GLU:HG2  | 2.32                     | 0.64              |
| 2:B:306:LEU:HB3  | 2:B:321:CYS:HB3  | 1.78                     | 0.64              |
| 2:B:578:PRO:HB3  | 2:B:579:PRO:HD3  | 1.80                     | 0.64              |
| 3:M:371:GLU:O    | 3:M:419:ASN:OD1  | 2.14                     | 0.64              |
| 4:S:3:HIS:NE2    | 4:S:90:ASP:OD2   | 2.30                     | 0.64              |
| 1:A:145:ILE:HD13 | 4:S:156:LEU:HD22 | 1.78                     | 0.64              |
| 1:A:150:LEU:HD22 | 1:A:158:LEU:HD11 | 1.79                     | 0.64              |
| 2:B:196:LEU:C    | 2:B:229:HIS:CE1  | 2.69                     | 0.64              |
| 2:B:212:VAL:HG23 | 2:B:233:TYR:CE2  | 2.33                     | 0.64              |
| 2:B:344:VAL:HG22 | 2:B:381:PHE:CZ   | 2.32                     | 0.64              |
| 2:B:519:ALA:HB1  | 2:B:555:LEU:HD12 | 1.80                     | 0.64              |
| 2:B:549:LEU:CG   | 2:B:614:ILE:HD12 | 2.27                     | 0.64              |
| 3:M:3:LEU:HA     | 3:M:80:THR:HA    | 1.79                     | 0.64              |
| 3:M:101:LEU:C    | 3:M:106:LYS:CA   | 2.64                     | 0.64              |
| 1:A:323:CYS:SG   | 1:A:338:PHE:CE1  | 2.74                     | 0.64              |
| 2:B:90:ILE:HD11  | 2:B:123:LEU:CD2  | 2.27                     | 0.64              |
| 2:B:344:VAL:CG2  | 2:B:363:ILE:CD1  | 2.74                     | 0.64              |
| 2:B:396:ILE:HG21 | 2:B:432:ALA:HA   | 1.78                     | 0.64              |
| 2:B:513:TRP:CG   | 2:B:551:LEU:CD2  | 2.76                     | 0.64              |
| 3:M:255:LEU:O    | 3:M:454:ILE:HG13 | 1.97                     | 0.64              |
| 3:M:256:VAL:HG12 | 3:M:290:PHE:CB   | 2.23                     | 0.64              |
| 3:M:352:GLN:HB3  | 3:M:403:THR:O    | 1.97                     | 0.64              |
| 4:S:69:ASN:ND2   | 4:S:71:GLU:O     | 2.31                     | 0.64              |
| 4:S:135:ILE:C    | 4:S:141:VAL:HG22 | 2.18                     | 0.64              |
| 1:A:552:ILE:O    | 1:A:556:VAL:HG23 | 1.97                     | 0.64              |
| 1:A:585:PHE:CD2  | 1:A:603:VAL:HG12 | 2.32                     | 0.64              |
| 1:A:634:ASN:ND2  | 2:B:554:LYS:N    | 2.37                     | 0.64              |

*Continued on next page...*

*Continued from previous page...*

| Atom-1           | Atom-2           | Interatomic distance (Å) | Clash overlap (Å) |
|------------------|------------------|--------------------------|-------------------|
| 2:B:158:VAL:CG2  | 2:B:177:ILE:HG13 | 2.27                     | 0.64              |
| 2:B:275:ARG:HB3  | 2:B:294:VAL:CG1  | 2.19                     | 0.64              |
| 3:M:49:ASP:HA    | 3:M:75:TRP:CZ3   | 2.32                     | 0.64              |
| 3:M:250:LEU:HD13 | 3:M:254:PRO:CG   | 2.27                     | 0.64              |
| 3:M:350:VAL:CG1  | 3:M:442:GLN:HB2  | 2.26                     | 0.64              |
| 1:A:67:LYS:HB2   | 4:S:166:LYS:N    | 2.11                     | 0.64              |
| 1:A:96:SER:HB2   | 1:A:127:LEU:CD1  | 2.08                     | 0.64              |
| 1:A:239:LEU:O    | 1:A:242:GLU:O    | 2.14                     | 0.64              |
| 2:B:20:ARG:HH11  | 2:B:21:GLU:HG2   | 1.57                     | 0.64              |
| 2:B:79:VAL:HG21  | 2:B:108:PHE:CZ   | 2.33                     | 0.64              |
| 2:B:123:LEU:CD2  | 2:B:138:ALA:HB1  | 2.27                     | 0.64              |
| 2:B:214:ALA:C    | 2:B:216:LYS:N    | 2.48                     | 0.64              |
| 2:B:316:THR:CG2  | 3:M:90:PHE:HE2   | 1.75                     | 0.64              |
| 2:B:346:THR:HG22 | 2:B:350:THR:HG21 | 1.78                     | 0.64              |
| 3:M:74:TYR:OH    | 3:M:97:ASP:HB3   | 1.98                     | 0.64              |
| 3:M:214:LEU:O    | 3:M:214:LEU:HD23 | 1.97                     | 0.64              |
| 3:M:257:ALA:HB2  | 3:M:455:VAL:CG2  | 2.28                     | 0.64              |
| 4:S:8:PHE:HE2    | 4:S:86:THR:OG1   | 1.81                     | 0.64              |
| 1:A:91:ILE:HG21  | 1:A:110:ALA:HB2  | 1.80                     | 0.64              |
| 1:A:103:LYS:C    | 1:A:107:TYR:CD1  | 2.70                     | 0.64              |
| 2:B:87:VAL:HG13  | 2:B:122:SER:HG   | 1.57                     | 0.64              |
| 2:B:266:VAL:HA   | 2:B:289:PRO:HB2  | 1.79                     | 0.64              |
| 2:B:513:TRP:C    | 2:B:551:LEU:HD22 | 2.17                     | 0.64              |
| 2:B:559:ASP:HB3  | 2:B:563:PHE:CG   | 2.33                     | 0.64              |
| 3:M:96:ILE:CG2   | 3:M:125:PHE:CE1  | 2.81                     | 0.64              |
| 3:M:260:LEU:HD22 | 3:M:449:VAL:CG2  | 2.24                     | 0.64              |
| 1:A:119:ASP:O    | 1:A:123:LEU:HG   | 1.97                     | 0.64              |
| 1:A:513:ARG:HB3  | 1:A:550:VAL:HG11 | 1.78                     | 0.64              |
| 1:A:575:LYS:HG3  | 1:A:611:LEU:HG   | 1.77                     | 0.64              |
| 2:B:29:LYS:HD3   | 2:B:30:LEU:H     | 1.62                     | 0.64              |
| 2:B:30:LEU:C     | 2:B:30:LEU:HD12  | 2.18                     | 0.64              |
| 2:B:219:TYR:HD1  | 2:B:226:LEU:CD2  | 1.83                     | 0.64              |
| 2:B:306:LEU:HD12 | 2:B:325:LEU:CD2  | 2.28                     | 0.64              |
| 3:M:217:ASP:CB   | 3:M:471:LYS:HA   | 2.27                     | 0.64              |
| 1:A:255:ARG:O    | 1:A:257:LEU:N    | 2.31                     | 0.64              |
| 1:A:405:THR:OG1  | 1:A:406:GLY:N    | 2.27                     | 0.64              |
| 1:A:557:LYS:HG2  | 2:B:606:ASP:CA   | 2.28                     | 0.64              |
| 1:A:581:LEU:HD23 | 1:A:607:LEU:HD22 | 1.80                     | 0.64              |
| 1:A:631:SER:HB3  | 2:B:557:SER:HB2  | 1.74                     | 0.64              |
| 2:B:132:SER:HB2  | 2:B:166:SER:CB   | 2.27                     | 0.64              |
| 2:B:396:ILE:HD11 | 2:B:418:TYR:OH   | 1.92                     | 0.64              |

*Continued on next page...*

*Continued from previous page...*

| Atom-1           | Atom-2           | Interatomic distance (Å) | Clash overlap (Å) |
|------------------|------------------|--------------------------|-------------------|
| 3:M:214:LEU:O    | 3:M:467:TYR:CB   | 2.44                     | 0.64              |
| 3:M:356:LEU:HD21 | 3:M:358:ILE:CG1  | 2.27                     | 0.64              |
| 1:A:125:THR:C    | 1:A:127:LEU:N    | 2.50                     | 0.64              |
| 1:A:436:CYS:SG   | 1:A:450:TYR:CE2  | 2.87                     | 0.64              |
| 1:A:609:LEU:CD2  | 1:A:628:VAL:CB   | 2.76                     | 0.64              |
| 2:B:79:VAL:HB    | 2:B:108:PHE:CD1  | 2.33                     | 0.64              |
| 2:B:277:CYS:HA   | 2:B:292:GLU:CB   | 2.26                     | 0.64              |
| 2:B:461:HIS:O    | 2:B:462:ASN:O    | 2.16                     | 0.64              |
| 2:B:508:ARG:O    | 2:B:509:ALA:O    | 2.16                     | 0.64              |
| 2:B:534:ILE:HD11 | 2:B:595:VAL:HG23 | 1.80                     | 0.64              |
| 2:B:566:ALA:O    | 2:B:574:ASN:HB3  | 1.78                     | 0.64              |
| 3:M:16:PHE:HE2   | 3:M:125:PHE:CE2  | 2.16                     | 0.64              |
| 3:M:316:ARG:O    | 3:M:318:ASN:OD1  | 2.15                     | 0.64              |
| 4:S:53:THR:CG2   | 4:S:69:ASN:N     | 2.61                     | 0.64              |
| 4:S:157:ASN:O    | 4:S:161:GLU:HG3  | 1.97                     | 0.64              |
| 1:A:67:LYS:HB3   | 4:S:166:LYS:CA   | 2.28                     | 0.64              |
| 1:A:219:VAL:CG2  | 1:A:256:LEU:CD2  | 2.69                     | 0.64              |
| 2:B:2:VAL:CG1    | 2:B:6:HIS:CD2    | 2.61                     | 0.64              |
| 2:B:8:ILE:O      | 2:B:12:LEU:CD1   | 2.45                     | 0.64              |
| 2:B:47:LEU:CB    | 2:B:66:ILE:HG12  | 2.28                     | 0.64              |
| 2:B:50:LEU:HD23  | 2:B:62:ALA:N     | 2.13                     | 0.64              |
| 2:B:136:CYS:O    | 2:B:172:GLU:CB   | 2.45                     | 0.64              |
| 2:B:309:LEU:CG   | 2:B:317:VAL:HG11 | 2.27                     | 0.64              |
| 3:M:316:ARG:HG3  | 3:M:322:LEU:HD13 | 1.80                     | 0.64              |
| 3:M:375:LYS:HE3  | 3:M:418:GLU:OE1  | 1.97                     | 0.64              |
| 4:S:8:PHE:CE2    | 4:S:86:THR:OG1   | 2.50                     | 0.64              |
| 1:A:105:VAL:CG2  | 4:S:167:ILE:HA   | 2.28                     | 0.63              |
| 1:A:484:VAL:O    | 1:A:486:SER:O    | 2.16                     | 0.63              |
| 1:A:598:GLU:O    | 1:A:602:GLU:HG3  | 1.99                     | 0.63              |
| 2:B:45:GLN:C     | 2:B:47:LEU:H     | 2.01                     | 0.63              |
| 2:B:93:ASN:C     | 2:B:134:LEU:HD11 | 2.18                     | 0.63              |
| 2:B:275:ARG:NE   | 2:B:275:ARG:HA   | 2.13                     | 0.63              |
| 2:B:449:HIS:O    | 2:B:453:TRP:CD1  | 2.51                     | 0.63              |
| 2:B:520:SER:O    | 2:B:523:PHE:HE2  | 1.81                     | 0.63              |
| 3:M:45:SER:HA    | 3:M:47:SER:N     | 2.07                     | 0.63              |
| 3:M:100:LEU:HD13 | 3:M:100:LEU:N    | 2.13                     | 0.63              |
| 1:A:104:ARG:NH1  | 4:S:126:GLN:C    | 2.52                     | 0.63              |
| 1:A:121:LEU:CD1  | 1:A:155:THR:CG2  | 2.77                     | 0.63              |
| 1:A:196:LEU:O    | 1:A:197:ARG:C    | 2.31                     | 0.63              |
| 1:A:297:CYS:O    | 1:A:298:ILE:C    | 2.32                     | 0.63              |
| 1:A:451:ASN:OD1  | 1:A:480:LEU:HD12 | 1.98                     | 0.63              |

*Continued on next page...*



*Continued from previous page...*

| Atom-1           | Atom-2           | Interatomic distance (Å) | Clash overlap (Å) |
|------------------|------------------|--------------------------|-------------------|
| 2:B:63:MET:HA    | 2:B:66:ILE:HD12  | 1.78                     | 0.63              |
| 2:B:83:PHE:HZ    | 2:B:119:SER:HB2  | 1.53                     | 0.63              |
| 2:B:98:LYS:HB2   | 2:B:134:LEU:HD22 | 1.78                     | 0.63              |
| 2:B:215:TYR:CD2  | 2:B:226:LEU:HD13 | 2.31                     | 0.63              |
| 2:B:487:LEU:HD21 | 2:B:522:GLU:CB   | 2.25                     | 0.63              |
| 2:B:545:ARG:HD2  | 2:B:602:ASP:HB2  | 1.79                     | 0.63              |
| 3:M:100:LEU:H    | 3:M:100:LEU:HD13 | 1.61                     | 0.63              |
| 3:M:215:TYR:HB2  | 3:M:467:TYR:C    | 2.18                     | 0.63              |
| 3:M:241:HIS:CB   | 3:M:476:THR:HG23 | 2.29                     | 0.63              |
| 1:A:67:LYS:C     | 4:S:166:LYS:CA   | 2.66                     | 0.63              |
| 1:A:103:LYS:HZ2  | 1:A:131:ASP:HB2  | 1.63                     | 0.63              |
| 1:A:322:PHE:HB3  | 1:A:330:LEU:HD21 | 1.79                     | 0.63              |
| 2:B:157:THR:C    | 2:B:159:LYS:N    | 2.51                     | 0.63              |
| 2:B:167:ALA:O    | 2:B:207:VAL:HG11 | 1.99                     | 0.63              |
| 2:B:245:GLN:NE2  | 2:B:309:LEU:HD13 | 2.14                     | 0.63              |
| 2:B:287:GLU:O    | 2:B:288:TYR:CD2  | 2.50                     | 0.63              |
| 2:B:364:HIS:CE1  | 2:B:397:GLN:HB3  | 2.33                     | 0.63              |
| 2:B:537:PHE:CD2  | 2:B:537:PHE:C    | 2.71                     | 0.63              |
| 1:A:100:LEU:HD11 | 4:S:157:ASN:C    | 2.17                     | 0.63              |
| 2:B:36:THR:O     | 2:B:40:GLN:CB    | 2.46                     | 0.63              |
| 3:M:10:THR:HA    | 3:M:75:TRP:HE1   | 1.62                     | 0.63              |
| 3:M:96:ILE:CG2   | 3:M:125:PHE:CZ   | 2.81                     | 0.63              |
| 3:M:258:VAL:CA   | 3:M:452:ILE:HG13 | 2.28                     | 0.63              |
| 3:M:265:ASN:HB3  | 3:M:309:GLN:CG   | 2.29                     | 0.63              |
| 3:M:320:ILE:HG13 | 3:M:347:PHE:HD1  | 1.59                     | 0.63              |
| 4:S:164:ASP:O    | 4:S:165:SER:C    | 2.20                     | 0.63              |
| 1:A:104:ARG:HG2  | 4:S:126:GLN:OE1  | 1.97                     | 0.63              |
| 1:A:139:ASP:OD1  | 1:A:177:ILE:HD11 | 1.98                     | 0.63              |
| 1:A:156:PRO:O    | 1:A:160:ARG:HG3  | 1.98                     | 0.63              |
| 1:A:175:PRO:HA   | 1:A:214:VAL:CG2  | 2.29                     | 0.63              |
| 2:B:178:ILE:HG22 | 2:B:217:GLU:HB2  | 1.74                     | 0.63              |
| 2:B:243:TRP:CZ3  | 3:M:91:THR:CA    | 2.75                     | 0.63              |
| 2:B:274:PRO:CG   | 2:B:295:ASN:HD21 | 2.05                     | 0.63              |
| 2:B:319:LEU:O    | 2:B:322:CYS:N    | 2.31                     | 0.63              |
| 2:B:360:LEU:HD11 | 2:B:391:ALA:HB1  | 1.81                     | 0.63              |
| 2:B:475:ILE:CG2  | 2:B:514:LEU:CD2  | 2.76                     | 0.63              |
| 3:M:125:PHE:O    | 3:M:129:VAL:HG21 | 1.93                     | 0.63              |
| 3:M:347:PHE:CE2  | 3:M:350:VAL:HB   | 2.34                     | 0.63              |
| 1:A:68:THR:HA    | 4:S:167:ILE:CA   | 2.28                     | 0.63              |
| 1:A:185:LEU:O    | 1:A:189:PHE:CG   | 2.51                     | 0.63              |
| 1:A:571:ARG:NH2  | 1:A:573:GLU:OE1  | 2.30                     | 0.63              |

*Continued on next page...*

*Continued from previous page...*

| Atom-1           | Atom-2           | Interatomic distance (Å) | Clash overlap (Å) |
|------------------|------------------|--------------------------|-------------------|
| 2:B:90:ILE:HD11  | 2:B:123:LEU:HD21 | 1.80                     | 0.63              |
| 2:B:295:ASN:O    | 2:B:296:ASP:HB2  | 1.99                     | 0.63              |
| 2:B:334:MET:HB2  | 2:B:369:LEU:CD2  | 2.27                     | 0.63              |
| 2:B:396:ILE:HD11 | 2:B:418:TYR:CE2  | 2.25                     | 0.63              |
| 2:B:452:LYS:HZ3  | 2:B:456:ASP:CG   | 2.01                     | 0.63              |
| 2:B:515:PHE:O    | 2:B:516:GLY:C    | 2.33                     | 0.63              |
| 2:B:526:CYS:N    | 2:B:527:PRO:HD3  | 2.14                     | 0.63              |
| 3:M:354:ASP:CB   | 3:M:440:ILE:HD12 | 2.28                     | 0.63              |
| 3:M:360:LEU:HD13 | 3:M:433:VAL:CB   | 2.27                     | 0.63              |
| 4:S:6:LEU:CD2    | 4:S:32:LEU:HD22  | 2.24                     | 0.63              |
| 1:A:141:VAL:HG12 | 4:S:159:ALA:HB3  | 0.73                     | 0.63              |
| 1:A:179:LYS:CD   | 4:S:143:GLU:CG   | 2.74                     | 0.63              |
| 1:A:313:MET:HA   | 1:A:348:PHE:CZ   | 2.33                     | 0.63              |
| 1:A:563:CYS:SG   | 1:A:621:LEU:HD11 | 2.39                     | 0.63              |
| 1:A:575:LYS:HE3  | 1:A:611:LEU:HD21 | 1.80                     | 0.63              |
| 1:A:581:LEU:CD2  | 1:A:607:LEU:CD1  | 2.77                     | 0.63              |
| 2:B:362:ALA:O    | 2:B:366:LEU:HG   | 1.99                     | 0.63              |
| 2:B:592:TYR:CE2  | 2:B:619:ASP:OD1  | 2.52                     | 0.63              |
| 3:M:10:THR:HG23  | 3:M:11:LYS:N     | 2.13                     | 0.63              |
| 3:M:215:TYR:CD2  | 3:M:470:ALA:N    | 2.64                     | 0.63              |
| 1:A:96:SER:H     | 4:S:166:LYS:NZ   | 1.96                     | 0.63              |
| 1:A:141:VAL:HG11 | 4:S:159:ALA:N    | 2.12                     | 0.63              |
| 1:A:178:ARG:HB2  | 1:A:214:VAL:HG22 | 1.78                     | 0.63              |
| 1:A:253:ILE:CD1  | 1:A:281:LEU:CD2  | 2.70                     | 0.63              |
| 1:A:369:SER:HB2  | 1:A:424:TYR:CE2  | 2.32                     | 0.63              |
| 1:A:566:PHE:HZ   | 1:A:618:THR:O    | 1.82                     | 0.63              |
| 1:A:607:LEU:O    | 1:A:609:LEU:N    | 2.32                     | 0.63              |
| 2:B:268:LYS:CA   | 2:B:276:SER:HB2  | 2.29                     | 0.63              |
| 2:B:293:VAL:O    | 2:B:299:LEU:HG   | 1.99                     | 0.63              |
| 2:B:481:LYS:C    | 2:B:483:PRO:HD3  | 2.18                     | 0.63              |
| 3:M:306:LEU:CD2  | 3:M:317:MET:CE   | 2.77                     | 0.63              |
| 4:S:7:ILE:CD1    | 4:S:16:LEU:HD23  | 2.28                     | 0.63              |
| 4:S:20:TYR:HD2   | 4:S:21:THR:HG23  | 1.62                     | 0.63              |
| 4:S:80:TYR:HB2   | 4:S:106:VAL:HG11 | 1.80                     | 0.63              |
| 1:A:100:LEU:N    | 4:S:162:SER:CB   | 2.04                     | 0.63              |
| 1:A:102:GLN:CD   | 4:S:166:LYS:N    | 2.42                     | 0.63              |
| 1:A:225:LEU:HB2  | 1:A:233:PHE:CE1  | 2.33                     | 0.63              |
| 1:A:563:CYS:SG   | 1:A:621:LEU:HD12 | 2.37                     | 0.63              |
| 1:A:581:LEU:HD23 | 1:A:607:LEU:HD11 | 1.81                     | 0.63              |
| 2:B:4:SER:O      | 2:B:8:ILE:HD12   | 1.99                     | 0.63              |
| 2:B:136:CYS:C    | 2:B:172:GLU:CB   | 2.67                     | 0.63              |

*Continued on next page...*

*Continued from previous page...*

| Atom-1           | Atom-2           | Interatomic distance (Å) | Clash overlap (Å) |
|------------------|------------------|--------------------------|-------------------|
| 2:B:431:MET:C    | 2:B:433:VAL:H    | 2.03                     | 0.63              |
| 2:B:518:ILE:O    | 2:B:518:ILE:CD1  | 2.47                     | 0.63              |
| 2:B:545:ARG:HD2  | 2:B:602:ASP:CB   | 2.28                     | 0.63              |
| 3:M:99:ILE:CD1   | 3:M:99:ILE:H     | 2.12                     | 0.63              |
| 3:M:245:ASP:N    | 3:M:472:TYR:CZ   | 2.66                     | 0.63              |
| 3:M:377:LYS:HE3  | 3:M:416:GLU:CB   | 2.28                     | 0.63              |
| 3:M:437:TYR:HD1  | 3:M:479:PHE:CZ   | 2.17                     | 0.63              |
| 1:A:144:GLY:HA2  | 1:A:180:LYS:HB3  | 1.78                     | 0.62              |
| 2:B:90:ILE:HD11  | 2:B:102:HIS:NE2  | 2.14                     | 0.62              |
| 2:B:124:GLN:HA   | 2:B:157:THR:HG1  | 1.63                     | 0.62              |
| 2:B:154:ILE:CD1  | 2:B:180:LEU:CG   | 2.77                     | 0.62              |
| 2:B:154:ILE:O    | 2:B:158:VAL:HG23 | 1.98                     | 0.62              |
| 2:B:353:GLN:HG3  | 3:M:47:SER:CB    | 2.29                     | 0.62              |
| 2:B:353:GLN:CG   | 3:M:47:SER:HB2   | 2.29                     | 0.62              |
| 3:M:320:ILE:HG22 | 3:M:321:GLY:N    | 2.14                     | 0.62              |
| 4:S:8:PHE:CG     | 4:S:36:TYR:CE2   | 2.83                     | 0.62              |
| 4:S:47:GLN:HE22  | 4:S:78:LYS:CA    | 2.11                     | 0.62              |
| 4:S:137:GLN:C    | 4:S:140:MET:H    | 2.02                     | 0.62              |
| 1:A:100:LEU:CA   | 4:S:162:SER:HB2  | 2.22                     | 0.62              |
| 1:A:117:ASP:OD2  | 1:A:120:ILE:HG12 | 2.00                     | 0.62              |
| 1:A:142:LYS:H    | 4:S:159:ALA:HB2  | 1.53                     | 0.62              |
| 1:A:237:SER:CB   | 1:A:270:LEU:HD13 | 2.23                     | 0.62              |
| 1:A:342:GLY:O    | 1:A:343:LYS:C    | 2.35                     | 0.62              |
| 2:B:63:MET:HE1   | 2:B:104:TYR:CB   | 2.29                     | 0.62              |
| 2:B:435:SER:C    | 2:B:437:SER:N    | 2.53                     | 0.62              |
| 2:B:512:VAL:HG12 | 2:B:551:LEU:HB2  | 1.82                     | 0.62              |
| 2:B:567:GLN:CA   | 2:B:569:THR:OG1  | 2.47                     | 0.62              |
| 3:M:66:PHE:CE2   | 3:M:77:LEU:O     | 2.53                     | 0.62              |
| 3:M:104:PHE:HE1  | 3:M:113:LYS:HE2  | 0.77                     | 0.62              |
| 3:M:272:LEU:CD2  | 3:M:288:ILE:HD13 | 2.30                     | 0.62              |
| 1:A:80:TYR:CD1   | 1:A:82:PHE:CE2   | 2.88                     | 0.62              |
| 1:A:180:LYS:HE3  | 4:S:156:LEU:HD11 | 1.81                     | 0.62              |
| 1:A:240:LEU:O    | 1:A:242:GLU:O    | 2.18                     | 0.62              |
| 2:B:157:THR:O    | 2:B:160:LYS:N    | 2.32                     | 0.62              |
| 2:B:182:ARG:HD2  | 2:B:217:GLU:CG   | 2.29                     | 0.62              |
| 2:B:307:ASN:OD1  | 2:B:339:PHE:HE2  | 1.77                     | 0.62              |
| 2:B:416:LYS:HD2  | 2:B:453:TRP:CD2  | 2.34                     | 0.62              |
| 2:B:500:GLN:O    | 2:B:508:ARG:NH2  | 2.32                     | 0.62              |
| 3:M:10:THR:CA    | 3:M:75:TRP:NE1   | 2.62                     | 0.62              |
| 1:A:76:TYR:OH    | 4:S:125:TRP:CZ3  | 2.39                     | 0.62              |
| 1:A:96:SER:N     | 4:S:166:LYS:HZ1  | 1.97                     | 0.62              |

*Continued on next page...*

*Continued from previous page...*

| Atom-1           | Atom-2           | Interatomic distance (Å) | Clash overlap (Å) |
|------------------|------------------|--------------------------|-------------------|
| 1:A:101:GLN:N    | 4:S:162:SER:H    | 1.96                     | 0.62              |
| 1:A:176:TYR:CG   | 4:S:155:GLU:HG2  | 2.34                     | 0.62              |
| 1:A:212:ILE:HB   | 4:S:145:ASN:HD22 | 1.63                     | 0.62              |
| 1:A:255:ARG:HH21 | 4:S:135:ILE:CG2  | 1.99                     | 0.62              |
| 1:A:403:LEU:HD21 | 1:A:421:PRO:CA   | 2.28                     | 0.62              |
| 1:A:513:ARG:CG   | 1:A:550:VAL:HG21 | 2.29                     | 0.62              |
| 2:B:136:CYS:CA   | 2:B:172:GLU:HB2  | 2.28                     | 0.62              |
| 2:B:153:ILE:C    | 2:B:155:LEU:H    | 2.03                     | 0.62              |
| 3:M:242:GLY:CA   | 3:M:444:ALA:CB   | 2.77                     | 0.62              |
| 4:S:48:SER:HA    | 4:S:77:TYR:HB3   | 1.81                     | 0.62              |
| 4:S:164:ASP:HA   | 4:S:167:ILE:HB   | 1.79                     | 0.62              |
| 1:A:141:VAL:CB   | 4:S:159:ALA:HB2  | 2.29                     | 0.62              |
| 2:B:135:ARG:NH2  | 2:B:164:ASP:CB   | 2.62                     | 0.62              |
| 2:B:196:LEU:O    | 2:B:199:LEU:HB2  | 1.99                     | 0.62              |
| 2:B:196:LEU:CB   | 2:B:229:HIS:HD1  | 2.13                     | 0.62              |
| 2:B:316:THR:HG23 | 3:M:90:PHE:CE2   | 2.31                     | 0.62              |
| 2:B:319:LEU:CD1  | 2:B:358:MET:SD   | 2.78                     | 0.62              |
| 2:B:472:VAL:HG11 | 2:B:510:GLY:HA2  | 1.68                     | 0.62              |
| 3:M:407:THR:O    | 3:M:409:PRO:HD3  | 1.98                     | 0.62              |
| 1:A:175:PRO:O    | 1:A:214:VAL:HG22 | 2.00                     | 0.62              |
| 3:M:62:VAL:O     | 3:M:62:VAL:HG12  | 2.00                     | 0.62              |
| 3:M:224:VAL:CA   | 3:M:479:PHE:HA   | 2.29                     | 0.62              |
| 3:M:356:LEU:C    | 3:M:356:LEU:HD23 | 2.19                     | 0.62              |
| 4:S:85:PHE:CE1   | 4:S:106:VAL:HG22 | 2.34                     | 0.62              |
| 1:A:80:TYR:HB3   | 1:A:82:PHE:CZ    | 2.34                     | 0.62              |
| 1:A:99:LYS:HZ2   | 4:S:164:ASP:HB3  | 1.65                     | 0.62              |
| 1:A:212:ILE:HB   | 1:A:247:ILE:HD13 | 1.78                     | 0.62              |
| 1:A:480:LEU:O    | 1:A:483:LYS:O    | 2.18                     | 0.62              |
| 1:A:623:MET:C    | 2:B:617:LEU:HD21 | 2.20                     | 0.62              |
| 2:B:106:LEU:CD2  | 2:B:144:ASP:CB   | 2.76                     | 0.62              |
| 2:B:177:ILE:HG21 | 2:B:196:LEU:HD11 | 1.79                     | 0.62              |
| 2:B:309:LEU:CG   | 2:B:317:VAL:CG1  | 2.77                     | 0.62              |
| 2:B:511:ILE:O    | 2:B:515:PHE:HD1  | 1.83                     | 0.62              |
| 2:B:588:ILE:HG23 | 2:B:618:PHE:CE1  | 2.34                     | 0.62              |
| 3:M:216:VAL:HG11 | 3:M:452:ILE:HG12 | 1.81                     | 0.62              |
| 3:M:225:VAL:HA   | 3:M:480:GLN:H    | 1.65                     | 0.62              |
| 3:M:362:PHE:O    | 3:M:364:VAL:HG13 | 2.00                     | 0.62              |
| 4:S:75:ILE:CG2   | 4:S:86:THR:HG23  | 2.26                     | 0.62              |
| 1:A:101:GLN:O    | 1:A:104:ARG:N    | 2.29                     | 0.62              |
| 1:A:589:SER:O    | 1:A:597:GLN:NE2  | 2.32                     | 0.62              |
| 2:B:47:LEU:HD13  | 2:B:66:ILE:HA    | 1.81                     | 0.62              |

*Continued on next page...*

*Continued from previous page...*

| Atom-1           | Atom-2           | Interatomic distance (Å) | Clash overlap (Å) |
|------------------|------------------|--------------------------|-------------------|
| 2:B:143:SER:HB3  | 2:B:175:LEU:C    | 2.18                     | 0.62              |
| 2:B:486:HIS:HA   | 2:B:489:ILE:HD12 | 1.82                     | 0.62              |
| 1:A:67:LYS:HB3   | 4:S:166:LYS:CG   | 2.29                     | 0.62              |
| 1:A:91:ILE:CG2   | 1:A:110:ALA:HB2  | 2.30                     | 0.62              |
| 1:A:182:ILE:CG2  | 1:A:218:ALA:HA   | 2.29                     | 0.62              |
| 1:A:341:ILE:O    | 1:A:344:ILE:HB   | 1.99                     | 0.62              |
| 1:A:408:ILE:CG2  | 4:S:64:ASN:O     | 2.34                     | 0.62              |
| 2:B:360:LEU:HD13 | 2:B:391:ALA:O    | 2.00                     | 0.62              |
| 2:B:476:ARG:CA   | 2:B:514:LEU:HD13 | 2.30                     | 0.62              |
| 2:B:501:THR:C    | 2:B:508:ARG:NH2  | 2.53                     | 0.62              |
| 3:M:4:SER:OG     | 3:M:6:TYR:CZ     | 2.51                     | 0.62              |
| 3:M:24:ALA:O     | 3:M:25:PRO:C     | 2.34                     | 0.62              |
| 3:M:222:PHE:CB   | 3:M:479:PHE:CE1  | 2.82                     | 0.62              |
| 3:M:320:ILE:HG21 | 3:M:439:TYR:CZ   | 2.35                     | 0.62              |
| 4:S:32:LEU:O     | 4:S:36:TYR:CD1   | 2.53                     | 0.62              |
| 4:S:47:GLN:OE1   | 4:S:79:ASN:CA    | 2.42                     | 0.62              |
| 1:A:80:TYR:HB3   | 1:A:82:PHE:CE2   | 2.33                     | 0.62              |
| 1:A:326:GLN:CA   | 1:A:331:ARG:HH21 | 2.11                     | 0.62              |
| 1:A:556:VAL:CG2  | 1:A:603:VAL:HG11 | 2.29                     | 0.62              |
| 2:B:70:MET:HE2   | 2:B:104:TYR:HA   | 1.80                     | 0.62              |
| 2:B:545:ARG:HD3  | 2:B:602:ASP:CB   | 2.17                     | 0.62              |
| 2:B:545:ARG:NH1  | 2:B:602:ASP:HA   | 2.14                     | 0.62              |
| 3:M:1:MET:CA     | 3:M:81:SER:OG    | 2.48                     | 0.62              |
| 3:M:215:TYR:CD1  | 3:M:468:LYS:HG2  | 2.35                     | 0.62              |
| 3:M:223:HIS:CD2  | 3:M:478:ASN:CA   | 2.82                     | 0.62              |
| 3:M:449:VAL:HG11 | 3:M:452:ILE:CG1  | 2.30                     | 0.62              |
| 4:S:9:ASN:OD1    | 4:S:13:GLN:CA    | 2.46                     | 0.62              |
| 1:A:212:ILE:CB   | 1:A:247:ILE:HD13 | 2.30                     | 0.61              |
| 1:A:399:ASP:O    | 1:A:420:ILE:N    | 2.33                     | 0.61              |
| 2:B:216:LYS:HB2  | 2:B:251:LEU:CG   | 2.30                     | 0.61              |
| 2:B:302:PHE:CD2  | 2:B:328:LEU:HD11 | 2.35                     | 0.61              |
| 2:B:336:ASN:CG   | 2:B:338:LYS:HB2  | 2.21                     | 0.61              |
| 2:B:512:VAL:HG11 | 2:B:548:ILE:CA   | 2.11                     | 0.61              |
| 2:B:362:ALA:O    | 2:B:366:LEU:N    | 2.28                     | 0.61              |
| 3:M:214:LEU:N    | 3:M:467:TYR:HB2  | 2.15                     | 0.61              |
| 3:M:215:TYR:CE1  | 3:M:468:LYS:CG   | 2.82                     | 0.61              |
| 3:M:386:PHE:CD1  | 3:M:386:PHE:O    | 2.54                     | 0.61              |
| 3:M:469:GLY:C    | 3:M:470:ALA:O    | 2.38                     | 0.61              |
| 1:A:182:ILE:O    | 1:A:221:VAL:CG2  | 2.47                     | 0.61              |
| 1:A:183:THR:C    | 4:S:137:GLN:OE1  | 2.39                     | 0.61              |
| 1:A:630:PRO:CG   | 2:B:614:ILE:HG23 | 2.30                     | 0.61              |

*Continued on next page...*

*Continued from previous page...*

| Atom-1           | Atom-2           | Interatomic distance (Å) | Clash overlap (Å) |
|------------------|------------------|--------------------------|-------------------|
| 2:B:21:GLU:O     | 2:B:24:ALA:HB3   | 2.01                     | 0.61              |
| 2:B:162:VAL:C    | 2:B:164:ASP:N    | 2.53                     | 0.61              |
| 2:B:463:LEU:O    | 2:B:468:LEU:HD11 | 2.00                     | 0.61              |
| 2:B:508:ARG:HB2  | 2:B:544:THR:HG21 | 1.78                     | 0.61              |
| 2:B:520:SER:O    | 2:B:523:PHE:CE2  | 2.53                     | 0.61              |
| 3:M:233:LEU:CD2  | 3:M:325:LEU:H    | 2.13                     | 0.61              |
| 3:M:258:VAL:HG22 | 3:M:452:ILE:HG12 | 1.81                     | 0.61              |
| 3:M:267:ILE:HG23 | 3:M:445:SER:OG   | 1.99                     | 0.61              |
| 3:M:338:PHE:HE2  | 3:M:415:ILE:HG13 | 1.55                     | 0.61              |
| 4:S:3:HIS:O      | 4:S:20:TYR:N     | 2.31                     | 0.61              |
| 4:S:17:VAL:HG22  | 4:S:19:PHE:CE1   | 2.34                     | 0.61              |
| 1:A:259:LEU:CD1  | 4:S:140:MET:HE1  | 2.31                     | 0.61              |
| 1:A:312:ALA:O    | 1:A:315:CYS:HB2  | 2.00                     | 0.61              |
| 1:A:556:VAL:HG22 | 1:A:603:VAL:CG1  | 2.30                     | 0.61              |
| 1:A:589:SER:CB   | 1:A:601:VAL:HG22 | 2.30                     | 0.61              |
| 2:B:276:SER:C    | 2:B:289:PRO:HG2  | 2.14                     | 0.61              |
| 2:B:311:TYR:O    | 2:B:312:SER:C    | 2.38                     | 0.61              |
| 3:M:44:ASP:C     | 3:M:46:SER:N     | 2.53                     | 0.61              |
| 3:M:69:ILE:HD12  | 3:M:90:PHE:CE2   | 2.25                     | 0.61              |
| 3:M:224:VAL:CG1  | 3:M:226:PHE:CE1  | 2.84                     | 0.61              |
| 3:M:242:GLY:N    | 3:M:444:ALA:CB   | 2.64                     | 0.61              |
| 3:M:323:MET:CE   | 3:M:342:LEU:HD23 | 2.27                     | 0.61              |
| 3:M:356:LEU:CD2  | 3:M:358:ILE:CG1  | 2.77                     | 0.61              |
| 3:M:478:ASN:O    | 3:M:479:PHE:C    | 2.37                     | 0.61              |
| 1:A:273:LYS:O    | 1:A:276:PRO:HD2  | 2.01                     | 0.61              |
| 1:A:630:PRO:CG   | 2:B:614:ILE:CG2  | 2.78                     | 0.61              |
| 2:B:133:GLU:O    | 2:B:168:MET:HE1  | 2.00                     | 0.61              |
| 2:B:534:ILE:C    | 2:B:536:ASN:N    | 2.53                     | 0.61              |
| 3:M:121:ILE:O    | 3:M:125:PHE:HD1  | 1.81                     | 0.61              |
| 3:M:265:ASN:HA   | 3:M:313:SER:OG   | 2.00                     | 0.61              |
| 4:S:53:THR:CG2   | 4:S:57:LEU:CB    | 2.77                     | 0.61              |
| 1:A:328:PRO:O    | 1:A:329:ASN:C    | 2.25                     | 0.61              |
| 1:A:439:ASP:O    | 1:A:440:ASN:HB2  | 2.00                     | 0.61              |
| 2:B:44:PRO:HB3   | 2:B:82:TYR:OH    | 2.00                     | 0.61              |
| 2:B:178:ILE:HB   | 2:B:214:ALA:CB   | 2.29                     | 0.61              |
| 2:B:340:ILE:HG12 | 2:B:373:LEU:HD23 | 1.82                     | 0.61              |
| 2:B:355:ASN:O    | 2:B:359:LEU:CD2  | 2.48                     | 0.61              |
| 2:B:498:THR:HG21 | 2:B:532:ARG:HG3  | 1.82                     | 0.61              |
| 2:B:556:LEU:HD11 | 2:B:592:TYR:HB2  | 1.82                     | 0.61              |
| 3:M:244:VAL:HG13 | 3:M:472:TYR:OH   | 1.99                     | 0.61              |
| 3:M:443:SER:CB   | 3:M:447:ILE:CA   | 2.79                     | 0.61              |

*Continued on next page...*

*Continued from previous page...*

| Atom-1           | Atom-2           | Interatomic distance (Å) | Clash overlap (Å) |
|------------------|------------------|--------------------------|-------------------|
| 1:A:104:ARG:HG3  | 1:A:145:ILE:HD12 | 1.81                     | 0.61              |
| 1:A:224:GLU:CD   | 4:S:138:GLY:O    | 2.39                     | 0.61              |
| 1:A:266:VAL:O    | 1:A:267:GLU:HB2  | 2.01                     | 0.61              |
| 1:A:384:LEU:HG   | 1:A:385:LYS:N    | 2.15                     | 0.61              |
| 1:A:573:GLU:O    | 1:A:577:VAL:HG23 | 2.00                     | 0.61              |
| 2:B:101:ILE:O    | 2:B:104:TYR:HB3  | 2.00                     | 0.61              |
| 2:B:158:VAL:O    | 2:B:195:ILE:HD13 | 1.99                     | 0.61              |
| 2:B:162:VAL:C    | 2:B:164:ASP:H    | 2.04                     | 0.61              |
| 2:B:237:ILE:CG1  | 2:B:309:LEU:HD21 | 2.31                     | 0.61              |
| 2:B:267:ASP:N    | 2:B:289:PRO:HG3  | 2.14                     | 0.61              |
| 2:B:353:GLN:CB   | 3:M:47:SER:O     | 2.48                     | 0.61              |
| 3:M:451:ALA:O    | 3:M:452:ILE:HD12 | 2.00                     | 0.61              |
| 4:S:108:SER:O    | 4:S:112:CYS:SG   | 2.58                     | 0.61              |
| 1:A:369:SER:HB2  | 1:A:424:TYR:HE2  | 1.66                     | 0.61              |
| 1:A:376:GLU:H    | 1:A:376:GLU:CD   | 2.03                     | 0.61              |
| 1:A:634:ASN:HA   | 2:B:516:GLY:HA3  | 1.83                     | 0.61              |
| 2:B:127:LEU:HD23 | 2:B:135:ARG:O    | 2.01                     | 0.61              |
| 2:B:274:PRO:HD2  | 2:B:295:ASN:ND2  | 2.13                     | 0.61              |
| 2:B:498:THR:HG22 | 2:B:532:ARG:CB   | 2.31                     | 0.61              |
| 3:M:118:TYR:C    | 3:M:118:TYR:CD2  | 2.73                     | 0.61              |
| 3:M:215:TYR:HE1  | 3:M:468:LYS:HG2  | 1.60                     | 0.61              |
| 3:M:461:GLY:C    | 3:M:462:LYS:O    | 2.23                     | 0.61              |
| 1:A:100:LEU:CA   | 4:S:163:THR:HG23 | 2.27                     | 0.61              |
| 1:A:166:LEU:O    | 1:A:170:LEU:CD2  | 2.48                     | 0.61              |
| 1:A:180:LYS:HE3  | 4:S:156:LEU:CD2  | 2.29                     | 0.61              |
| 1:A:186:PHE:CD1  | 1:A:224:GLU:HG2  | 2.35                     | 0.61              |
| 1:A:244:LEU:O    | 1:A:246:THR:N    | 2.34                     | 0.61              |
| 2:B:204:ASP:HB3  | 2:B:207:VAL:HG23 | 1.82                     | 0.61              |
| 2:B:271:GLU:C    | 2:B:273:SER:N    | 2.44                     | 0.61              |
| 2:B:339:PHE:O    | 2:B:343:LEU:CB   | 2.49                     | 0.61              |
| 2:B:356:LYS:O    | 2:B:359:LEU:HB2  | 2.00                     | 0.61              |
| 3:M:6:TYR:CA     | 3:M:16:PHE:O     | 2.49                     | 0.61              |
| 3:M:217:ASP:HB3  | 3:M:471:LYS:CA   | 2.31                     | 0.61              |
| 3:M:244:VAL:HG22 | 3:M:472:TYR:CE2  | 2.36                     | 0.61              |
| 3:M:435:LEU:H    | 3:M:479:PHE:HB2  | 1.66                     | 0.61              |
| 2:B:38:TYR:CD1   | 2:B:42:ILE:HA    | 2.35                     | 0.61              |
| 2:B:127:LEU:HB2  | 2:B:157:THR:CG2  | 2.11                     | 0.61              |
| 2:B:216:LYS:HB2  | 2:B:251:LEU:HD22 | 1.82                     | 0.61              |
| 2:B:216:LYS:HG3  | 2:B:251:LEU:HA   | 1.83                     | 0.61              |
| 2:B:362:ALA:HB1  | 2:B:366:LEU:HD11 | 1.81                     | 0.61              |
| 2:B:512:VAL:C    | 2:B:551:LEU:CD1  | 2.46                     | 0.61              |

*Continued on next page...*

*Continued from previous page...*

| Atom-1           | Atom-2           | Interatomic distance (Å) | Clash overlap (Å) |
|------------------|------------------|--------------------------|-------------------|
| 3:M:9:ASP:CA     | 3:M:75:TRP:CD1   | 2.83                     | 0.61              |
| 3:M:9:ASP:OD2    | 3:M:13:LYS:HB3   | 2.01                     | 0.61              |
| 3:M:220:GLU:HG3  | 3:M:439:TYR:HB2  | 1.82                     | 0.61              |
| 3:M:220:GLU:HG2  | 3:M:439:TYR:O    | 2.01                     | 0.61              |
| 3:M:228:LYS:NZ   | 3:M:327:PHE:H    | 1.98                     | 0.61              |
| 3:M:479:PHE:CD2  | 3:M:479:PHE:N    | 2.59                     | 0.61              |
| 4:S:53:THR:CG2   | 4:S:68:VAL:N     | 2.62                     | 0.61              |
| 1:A:582:ILE:HD11 | 1:A:608:ARG:CA   | 2.30                     | 0.60              |
| 1:A:627:GLU:HG2  | 2:B:617:LEU:CA   | 1.96                     | 0.60              |
| 2:B:486:HIS:NE2  | 2:B:518:ILE:CB   | 2.48                     | 0.60              |
| 2:B:497:LEU:O    | 2:B:499:VAL:N    | 2.34                     | 0.60              |
| 2:B:563:PHE:O    | 2:B:566:ALA:C    | 2.38                     | 0.60              |
| 3:M:84:LYS:O     | 3:M:88:ASP:HB3   | 2.01                     | 0.60              |
| 4:S:14:PRO:O     | 4:S:15:ARG:CD    | 2.49                     | 0.60              |
| 4:S:25:LEU:CB    | 4:S:26:PRO:HD3   | 2.24                     | 0.60              |
| 2:B:77:ILE:C     | 2:B:79:VAL:N     | 2.48                     | 0.60              |
| 2:B:124:GLN:HA   | 2:B:127:LEU:HD12 | 1.82                     | 0.60              |
| 2:B:178:ILE:CG1  | 2:B:214:ALA:CA   | 2.70                     | 0.60              |
| 2:B:278:PRO:C    | 2:B:288:TYR:HB3  | 2.19                     | 0.60              |
| 2:B:343:LEU:HD21 | 2:B:362:ALA:CB   | 2.18                     | 0.60              |
| 2:B:354:GLY:O    | 2:B:358:MET:CG   | 2.47                     | 0.60              |
| 2:B:435:SER:C    | 2:B:437:SER:H    | 2.04                     | 0.60              |
| 2:B:602:ASP:O    | 2:B:608:ARG:NE   | 2.33                     | 0.60              |
| 3:M:380:ARG:CZ   | 3:M:412:ARG:HD2  | 2.31                     | 0.60              |
| 4:S:47:GLN:OE1   | 4:S:84:TYR:HD2   | 1.84                     | 0.60              |
| 1:A:111:SER:HB3  | 1:A:152:THR:OG1  | 1.91                     | 0.60              |
| 1:A:288:THR:CA   | 1:A:291:ILE:HD13 | 2.30                     | 0.60              |
| 1:A:309:PHE:CE1  | 1:A:348:PHE:CZ   | 2.89                     | 0.60              |
| 2:B:132:SER:HB2  | 2:B:169:VAL:HG23 | 1.82                     | 0.60              |
| 2:B:279:LEU:HD12 | 2:B:288:TYR:CE1  | 2.35                     | 0.60              |
| 2:B:393:ILE:HG23 | 2:B:431:MET:HB2  | 1.66                     | 0.60              |
| 3:M:60:LEU:CD2   | 3:M:62:VAL:CG2   | 2.56                     | 0.60              |
| 3:M:220:GLU:HG3  | 3:M:439:TYR:CB   | 2.31                     | 0.60              |
| 4:S:6:LEU:CD1    | 4:S:32:LEU:HD13  | 2.32                     | 0.60              |
| 1:A:186:PHE:CD2  | 1:A:186:PHE:C    | 2.75                     | 0.60              |
| 1:A:270:LEU:HD12 | 1:A:274:LEU:HD23 | 1.84                     | 0.60              |
| 1:A:436:CYS:SG   | 1:A:450:TYR:CE1  | 2.94                     | 0.60              |
| 1:A:631:SER:CB   | 2:B:557:SER:HB3  | 2.12                     | 0.60              |
| 2:B:47:LEU:HD22  | 2:B:66:ILE:HG13  | 0.63                     | 0.60              |
| 2:B:57:ARG:O     | 2:B:60:ARG:HB3   | 2.01                     | 0.60              |
| 2:B:90:ILE:HG12  | 2:B:98:LYS:CD    | 2.31                     | 0.60              |

*Continued on next page...*



*Continued from previous page...*

| Atom-1           | Atom-2           | Interatomic distance (Å) | Clash overlap (Å) |
|------------------|------------------|--------------------------|-------------------|
| 2:B:103:LEU:HD13 | 3:M:132:GLY:CA   | 2.28                     | 0.60              |
| 2:B:178:ILE:HG23 | 2:B:218:CYS:H    | 1.63                     | 0.60              |
| 2:B:231:ARG:O    | 2:B:233:TYR:N    | 2.34                     | 0.60              |
| 2:B:303:LEU:CD2  | 2:B:325:LEU:HD23 | 2.31                     | 0.60              |
| 3:M:65:TYR:CG    | 3:M:86:PRO:HB3   | 2.35                     | 0.60              |
| 3:M:68:VAL:O     | 3:M:68:VAL:HG12  | 2.01                     | 0.60              |
| 3:M:364:VAL:C    | 3:M:367:ALA:O    | 2.39                     | 0.60              |
| 4:S:10:LYS:HA    | 4:S:84:TYR:CE1   | 2.36                     | 0.60              |
| 1:A:156:PRO:O    | 1:A:157:SER:C    | 2.30                     | 0.60              |
| 1:A:399:ASP:O    | 1:A:420:ILE:HB   | 2.01                     | 0.60              |
| 1:A:624:LEU:HA   | 2:B:617:LEU:HD21 | 1.84                     | 0.60              |
| 1:A:633:PHE:HE1  | 2:B:513:TRP:HE3  | 0.80                     | 0.60              |
| 2:B:136:CYS:SG   | 2:B:168:MET:HG2  | 2.41                     | 0.60              |
| 2:B:154:ILE:CG2  | 2:B:176:ALA:HB1  | 2.31                     | 0.60              |
| 2:B:197:LYS:HA   | 2:B:229:HIS:HD2  | 1.53                     | 0.60              |
| 2:B:219:TYR:HB3  | 2:B:223:LEU:HD23 | 0.61                     | 0.60              |
| 2:B:319:LEU:CD1  | 2:B:358:MET:HG2  | 2.12                     | 0.60              |
| 2:B:341:GLU:CG   | 2:B:345:ARG:HE   | 2.13                     | 0.60              |
| 2:B:546:CYS:SG   | 2:B:607:ILE:HA   | 2.42                     | 0.60              |
| 2:B:553:ALA:CB   | 2:B:614:ILE:HG21 | 2.28                     | 0.60              |
| 2:B:589:SER:HG   | 2:B:618:PHE:HE2  | 1.43                     | 0.60              |
| 2:B:592:TYR:CE2  | 2:B:618:PHE:CE2  | 2.89                     | 0.60              |
| 1:A:121:LEU:HD11 | 1:A:155:THR:CG2  | 2.30                     | 0.60              |
| 1:A:360:LEU:HD21 | 1:A:375:VAL:HG21 | 1.83                     | 0.60              |
| 1:A:403:LEU:HD22 | 1:A:422:GLU:OE2  | 2.01                     | 0.60              |
| 1:A:586:GLU:O    | 1:A:587:ASN:O    | 2.17                     | 0.60              |
| 2:B:25:VAL:N     | 2:B:35:TYR:CD2   | 2.70                     | 0.60              |
| 2:B:178:ILE:C    | 2:B:180:LEU:N    | 2.45                     | 0.60              |
| 2:B:195:ILE:C    | 2:B:197:LYS:H    | 2.03                     | 0.60              |
| 2:B:351:GLU:H    | 2:B:351:GLU:CD   | 2.04                     | 0.60              |
| 2:B:374:PHE:HD2  | 2:B:402:LEU:HD11 | 1.63                     | 0.60              |
| 2:B:417:TYR:O    | 2:B:421:SER:HB2  | 2.01                     | 0.60              |
| 3:M:104:PHE:CE1  | 3:M:113:LYS:HE3  | 2.18                     | 0.60              |
| 3:M:223:HIS:N    | 3:M:479:PHE:CE2  | 2.69                     | 0.60              |
| 3:M:250:LEU:CD1  | 3:M:254:PRO:HG2  | 2.30                     | 0.60              |
| 4:S:135:ILE:CG2  | 4:S:141:VAL:CG2  | 2.78                     | 0.60              |
| 1:A:78:GLU:CD    | 1:A:113:SER:HB3  | 2.20                     | 0.60              |
| 1:A:416:ILE:O    | 1:A:418:ILE:HG22 | 2.02                     | 0.60              |
| 2:B:196:LEU:HB3  | 2:B:215:TYR:OH   | 2.02                     | 0.60              |
| 2:B:208:ILE:CG2  | 2:B:236:ILE:HG21 | 2.31                     | 0.60              |
| 2:B:431:MET:C    | 2:B:433:VAL:N    | 2.55                     | 0.60              |

*Continued on next page...*

*Continued from previous page...*

| Atom-1           | Atom-2           | Interatomic distance (Å) | Clash overlap (Å) |
|------------------|------------------|--------------------------|-------------------|
| 2:B:451:MET:HG3  | 2:B:489:ILE:HD11 | 1.83                     | 0.60              |
| 2:B:582:ASP:O    | 2:B:584:SER:CA   | 2.49                     | 0.60              |
| 3:M:235:LEU:HD23 | 3:M:235:LEU:C    | 2.22                     | 0.60              |
| 1:A:88:ASN:O     | 1:A:90:HIS:N     | 2.33                     | 0.60              |
| 1:A:96:SER:HB3   | 1:A:127:LEU:HD22 | 1.83                     | 0.60              |
| 1:A:104:ARG:HG3  | 1:A:145:ILE:HG21 | 1.83                     | 0.60              |
| 2:B:98:LYS:HD2   | 2:B:102:HIS:NE2  | 2.15                     | 0.60              |
| 2:B:196:LEU:HA   | 2:B:199:LEU:HD12 | 1.83                     | 0.60              |
| 2:B:493:LEU:HD21 | 2:B:511:ILE:HA   | 1.83                     | 0.60              |
| 2:B:530:LEU:CD2  | 2:B:591:MET:CB   | 2.79                     | 0.60              |
| 3:M:121:ILE:CG2  | 3:M:125:PHE:HE1  | 2.15                     | 0.60              |
| 3:M:124:ILE:CG2  | 3:M:128:CYS:SG   | 2.90                     | 0.60              |
| 3:M:271:SER:O    | 3:M:300:LEU:HA   | 2.01                     | 0.60              |
| 3:M:454:ILE:HG22 | 3:M:464:THR:HG21 | 1.77                     | 0.60              |
| 1:A:67:LYS:HD2   | 1:A:102:GLN:OE1  | 2.02                     | 0.60              |
| 1:A:150:LEU:CD1  | 1:A:162:ILE:HG12 | 2.27                     | 0.60              |
| 1:A:166:LEU:CD1  | 1:A:185:LEU:HD21 | 2.30                     | 0.60              |
| 1:A:212:ILE:CD1  | 4:S:145:ASN:CG   | 2.62                     | 0.60              |
| 1:A:292:TYR:O    | 1:A:295:VAL:HB   | 2.01                     | 0.60              |
| 1:A:633:PHE:CG   | 2:B:550:VAL:CB   | 2.83                     | 0.60              |
| 2:B:174:ALA:CB   | 2:B:211:ALA:HB2  | 2.30                     | 0.60              |
| 2:B:274:PRO:N    | 2:B:295:ASN:HD21 | 1.99                     | 0.60              |
| 2:B:286:ILE:O    | 2:B:286:ILE:HG23 | 2.00                     | 0.60              |
| 2:B:562:ASN:HB3  | 2:B:580:TYR:O    | 2.02                     | 0.60              |
| 3:M:99:ILE:HG22  | 3:M:103:TYR:CD1  | 2.37                     | 0.60              |
| 3:M:247:ARG:N    | 3:M:470:ALA:HB2  | 2.17                     | 0.60              |
| 1:A:139:ASP:C    | 1:A:177:ILE:CD1  | 2.69                     | 0.60              |
| 1:A:251:TRP:HH2  | 4:S:103:GLN:CD   | 2.03                     | 0.60              |
| 1:A:392:MET:HE3  | 1:A:428:MET:HE2  | 1.84                     | 0.60              |
| 2:B:237:ILE:O    | 2:B:239:GLN:N    | 2.35                     | 0.60              |
| 2:B:357:GLU:O    | 2:B:361:GLN:HG3  | 2.01                     | 0.60              |
| 2:B:482:ASN:N    | 2:B:483:PRO:HD3  | 2.16                     | 0.60              |
| 2:B:502:SER:O    | 2:B:503:LEU:C    | 2.35                     | 0.60              |
| 2:B:549:LEU:CD2  | 2:B:611:ALA:HA   | 2.10                     | 0.60              |
| 2:B:596:LEU:HD22 | 2:B:615:SER:HB2  | 1.83                     | 0.60              |
| 3:M:225:VAL:HG13 | 3:M:480:GLN:HB3  | 1.83                     | 0.60              |
| 3:M:226:PHE:O    | 3:M:482:ARG:N    | 2.29                     | 0.60              |
| 1:A:170:LEU:CA   | 1:A:206:LYS:HD2  | 2.32                     | 0.59              |
| 2:B:98:LYS:HD2   | 2:B:138:ALA:CB   | 2.29                     | 0.59              |
| 2:B:146:LYS:C    | 2:B:147:MET:HG2  | 2.23                     | 0.59              |
| 2:B:182:ARG:HG3  | 2:B:217:GLU:HB3  | 1.83                     | 0.59              |

*Continued on next page...*

*Continued from previous page...*

| Atom-1           | Atom-2           | Interatomic distance (Å) | Clash overlap (Å) |
|------------------|------------------|--------------------------|-------------------|
| 2:B:254:LYS:O    | 2:B:258:GLN:HG2  | 2.02                     | 0.59              |
| 2:B:353:GLN:HE22 | 2:B:356:LYS:HD2  | 1.67                     | 0.59              |
| 2:B:360:LEU:HB3  | 2:B:394:TRP:CB   | 2.31                     | 0.59              |
| 2:B:394:TRP:CZ3  | 2:B:397:GLN:CD   | 2.75                     | 0.59              |
| 2:B:544:THR:O    | 2:B:548:ILE:HG13 | 2.01                     | 0.59              |
| 3:M:53:HIS:HB3   | 3:M:65:TYR:CZ    | 2.37                     | 0.59              |
| 3:M:386:PHE:HB2  | 3:M:397:TRP:CD1  | 2.38                     | 0.59              |
| 4:S:48:SER:CA    | 4:S:77:TYR:HB3   | 2.27                     | 0.59              |
| 1:A:88:ASN:HB2   | 1:A:120:ILE:CD1  | 2.29                     | 0.59              |
| 1:A:147:LEU:CG   | 1:A:166:LEU:CD2  | 2.80                     | 0.59              |
| 1:A:630:PRO:C    | 2:B:554:LYS:HA   | 2.22                     | 0.59              |
| 2:B:37:TYR:OH    | 2:B:46:GLN:NE2   | 0.65                     | 0.59              |
| 2:B:80:GLN:CB    | 2:B:115:LEU:HD11 | 2.32                     | 0.59              |
| 2:B:144:ASP:CA   | 2:B:179:LYS:HD3  | 2.32                     | 0.59              |
| 2:B:215:TYR:O    | 2:B:219:TYR:HD1  | 1.85                     | 0.59              |
| 2:B:412:PHE:HE2  | 2:B:446:TRP:CB   | 2.13                     | 0.59              |
| 3:M:217:ASP:CG   | 3:M:471:LYS:CA   | 2.58                     | 0.59              |
| 1:A:331:ARG:O    | 1:A:334:SER:N    | 2.35                     | 0.59              |
| 1:A:533:ILE:HG13 | 1:A:562:TRP:CH2  | 2.36                     | 0.59              |
| 2:B:143:SER:HB2  | 2:B:179:LYS:HD2  | 1.81                     | 0.59              |
| 2:B:237:ILE:CG1  | 2:B:245:GLN:HG2  | 2.33                     | 0.59              |
| 2:B:316:THR:HG21 | 3:M:90:PHE:HE2   | 0.87                     | 0.59              |
| 2:B:563:PHE:O    | 2:B:566:ALA:N    | 2.35                     | 0.59              |
| 3:M:212:ASN:CB   | 3:M:250:LEU:CD2  | 2.73                     | 0.59              |
| 3:M:220:GLU:OE2  | 3:M:442:GLN:HB3  | 2.02                     | 0.59              |
| 3:M:222:PHE:HD1  | 3:M:240:ILE:HG23 | 1.57                     | 0.59              |
| 3:M:257:ALA:O    | 3:M:452:ILE:CG2  | 2.41                     | 0.59              |
| 3:M:344:ILE:O    | 3:M:344:ILE:HG22 | 2.02                     | 0.59              |
| 3:M:437:TYR:CB   | 3:M:439:TYR:CZ   | 2.84                     | 0.59              |
| 1:A:134:TYR:O    | 1:A:135:ASP:C    | 2.36                     | 0.59              |
| 1:A:145:ILE:O    | 1:A:148:SER:N    | 2.33                     | 0.59              |
| 1:A:213:SER:C    | 4:S:143:GLU:CG   | 2.67                     | 0.59              |
| 1:A:224:GLU:O    | 1:A:225:LEU:C    | 2.38                     | 0.59              |
| 1:A:253:ILE:CG2  | 1:A:281:LEU:HB3  | 2.32                     | 0.59              |
| 1:A:314:ALA:O    | 1:A:318:ARG:HD3  | 2.01                     | 0.59              |
| 1:A:447:PHE:O    | 1:A:450:TYR:HB3  | 2.03                     | 0.59              |
| 1:A:606:PHE:CD1  | 1:A:629:LEU:HG   | 2.37                     | 0.59              |
| 1:A:607:LEU:O    | 1:A:610:SER:N    | 2.35                     | 0.59              |
| 1:A:633:PHE:HD2  | 2:B:550:VAL:O    | 1.79                     | 0.59              |
| 2:B:176:ALA:C    | 2:B:178:ILE:H    | 2.04                     | 0.59              |
| 2:B:178:ILE:CB   | 2:B:214:ALA:C    | 2.71                     | 0.59              |

*Continued on next page...*

*Continued from previous page...*

| Atom-1           | Atom-2           | Interatomic distance (Å) | Clash overlap (Å) |
|------------------|------------------|--------------------------|-------------------|
| 2:B:297:PRO:O    | 2:B:301:LEU:CG   | 2.49                     | 0.59              |
| 2:B:352:ASN:HB2  | 3:M:49:ASP:HB3   | 1.81                     | 0.59              |
| 2:B:563:PHE:HE2  | 2:B:584:SER:HA   | 1.64                     | 0.59              |
| 3:M:354:ASP:HA   | 3:M:401:LYS:HB3  | 1.83                     | 0.59              |
| 3:M:374:TYR:OH   | 3:M:395:GLY:N    | 2.35                     | 0.59              |
| 3:M:378:ILE:C    | 3:M:413:GLY:HA3  | 2.13                     | 0.59              |
| 3:M:443:SER:HB3  | 3:M:447:ILE:CB   | 2.29                     | 0.59              |
| 1:A:68:THR:OG1   | 4:S:165:SER:C    | 2.38                     | 0.59              |
| 1:A:153:ILE:HB   | 1:A:158:LEU:HD21 | 1.85                     | 0.59              |
| 1:A:219:VAL:HG12 | 1:A:259:LEU:HD12 | 1.84                     | 0.59              |
| 1:A:584:PHE:C    | 1:A:587:ASN:H    | 2.02                     | 0.59              |
| 1:A:630:PRO:HG2  | 2:B:614:ILE:CG2  | 2.33                     | 0.59              |
| 2:B:64:LYS:HG3   | 2:B:100:LEU:CD1  | 2.33                     | 0.59              |
| 2:B:161:LEU:HB3  | 2:B:173:VAL:HG21 | 1.84                     | 0.59              |
| 2:B:215:TYR:CD1  | 2:B:233:TYR:CZ   | 2.87                     | 0.59              |
| 2:B:215:TYR:HD1  | 2:B:233:TYR:CZ   | 2.12                     | 0.59              |
| 3:M:99:ILE:CG2   | 3:M:103:TYR:HE1  | 2.15                     | 0.59              |
| 3:M:225:VAL:CA   | 3:M:480:GLN:O    | 2.51                     | 0.59              |
| 3:M:278:ILE:HG23 | 3:M:278:ILE:O    | 2.02                     | 0.59              |
| 3:M:323:MET:SD   | 3:M:342:LEU:CB   | 2.91                     | 0.59              |
| 3:M:338:PHE:CE2  | 3:M:415:ILE:HG12 | 2.33                     | 0.59              |
| 1:A:68:THR:OG1   | 4:S:167:ILE:N    | 2.36                     | 0.59              |
| 1:A:125:THR:C    | 1:A:127:LEU:H    | 2.04                     | 0.59              |
| 1:A:179:LYS:HD2  | 4:S:143:GLU:CB   | 2.30                     | 0.59              |
| 1:A:244:LEU:CB   | 1:A:256:LEU:HD13 | 2.32                     | 0.59              |
| 1:A:561:ASN:O    | 1:A:564:ASN:N    | 2.35                     | 0.59              |
| 2:B:38:TYR:CZ    | 2:B:42:ILE:HG12  | 2.21                     | 0.59              |
| 2:B:537:PHE:CZ   | 2:B:545:ARG:CD   | 2.85                     | 0.59              |
| 3:M:220:GLU:CG   | 3:M:439:TYR:CD1  | 2.85                     | 0.59              |
| 3:M:290:PHE:CD1  | 3:M:299:LEU:HD13 | 2.37                     | 0.59              |
| 1:A:170:LEU:O    | 1:A:206:LYS:NZ   | 2.35                     | 0.59              |
| 1:A:322:PHE:HD2  | 1:A:330:LEU:CD2  | 2.14                     | 0.59              |
| 1:A:375:VAL:O    | 1:A:378:ILE:O    | 2.21                     | 0.59              |
| 1:A:634:ASN:ND2  | 2:B:554:LYS:CB   | 2.49                     | 0.59              |
| 2:B:117:LEU:HA   | 2:B:150:LEU:CD2  | 2.33                     | 0.59              |
| 2:B:135:ARG:HH12 | 2:B:164:ASP:HB2  | 1.66                     | 0.59              |
| 2:B:597:TYR:O    | 2:B:601:TYR:CD1  | 2.55                     | 0.59              |
| 1:A:107:TYR:HE2  | 1:A:128:LEU:CD2  | 2.03                     | 0.59              |
| 1:A:153:ILE:HB   | 1:A:158:LEU:CD2  | 2.33                     | 0.59              |
| 1:A:291:ILE:HD12 | 1:A:291:ILE:H    | 1.67                     | 0.59              |
| 1:A:404:GLN:OE1  | 2:B:7:ARG:NH2    | 2.35                     | 0.59              |

*Continued on next page...*

*Continued from previous page...*

| Atom-1           | Atom-2           | Interatomic distance (Å) | Clash overlap (Å) |
|------------------|------------------|--------------------------|-------------------|
| 1:A:556:VAL:CG2  | 1:A:603:VAL:HG13 | 2.33                     | 0.59              |
| 1:A:621:LEU:HD13 | 1:A:621:LEU:C    | 2.23                     | 0.59              |
| 2:B:24:ALA:HB1   | 2:B:35:TYR:CG    | 2.37                     | 0.59              |
| 2:B:91:THR:HA    | 2:B:126:SER:HB2  | 1.85                     | 0.59              |
| 2:B:197:LYS:CD   | 2:B:283:TYR:CE2  | 2.86                     | 0.59              |
| 2:B:334:MET:C    | 2:B:336:ASN:H    | 2.06                     | 0.59              |
| 3:M:3:LEU:CG     | 3:M:80:THR:O     | 2.49                     | 0.59              |
| 3:M:104:PHE:CD1  | 3:M:117:ASN:ND2  | 2.71                     | 0.59              |
| 3:M:240:ILE:HG22 | 3:M:444:ALA:HB1  | 1.85                     | 0.59              |
| 3:M:467:TYR:CG   | 3:M:468:LYS:N    | 2.71                     | 0.59              |
| 1:A:67:LYS:HB2   | 4:S:165:SER:CB   | 2.33                     | 0.59              |
| 1:A:140:VAL:O    | 1:A:141:VAL:C    | 2.34                     | 0.59              |
| 2:B:37:TYR:C     | 2:B:39:SER:N     | 2.55                     | 0.59              |
| 2:B:50:LEU:HD23  | 2:B:62:ALA:CA    | 2.33                     | 0.59              |
| 2:B:142:LEU:HD13 | 2:B:154:ILE:HG12 | 1.85                     | 0.59              |
| 2:B:155:LEU:HD21 | 2:B:192:LEU:N    | 2.17                     | 0.59              |
| 2:B:178:ILE:CB   | 2:B:214:ALA:CA   | 2.81                     | 0.59              |
| 2:B:215:TYR:CE2  | 2:B:229:HIS:ND1  | 2.70                     | 0.59              |
| 2:B:275:ARG:HG2  | 2:B:294:VAL:HG21 | 1.83                     | 0.59              |
| 2:B:451:MET:CG   | 2:B:489:ILE:HG12 | 2.33                     | 0.59              |
| 2:B:461:HIS:HB3  | 2:B:463:LEU:HD23 | 1.84                     | 0.59              |
| 2:B:556:LEU:CD2  | 2:B:588:ILE:CD1  | 2.79                     | 0.59              |
| 3:M:243:ILE:HG21 | 3:M:298:ARG:HG2  | 1.83                     | 0.59              |
| 1:A:182:ILE:C    | 1:A:221:VAL:CG2  | 2.67                     | 0.59              |
| 1:A:402:ILE:O    | 1:A:402:ILE:HG22 | 2.02                     | 0.59              |
| 1:A:483:LYS:C    | 1:A:484:VAL:HG23 | 2.23                     | 0.59              |
| 2:B:387:ASP:HB3  | 2:B:391:ALA:CB   | 2.32                     | 0.59              |
| 2:B:389:ILE:HG23 | 2:B:427:ASN:HB2  | 1.82                     | 0.59              |
| 2:B:592:TYR:C    | 2:B:592:TYR:CD1  | 2.76                     | 0.59              |
| 3:M:244:VAL:HG22 | 3:M:472:TYR:HE2  | 1.66                     | 0.59              |
| 4:S:38:LEU:HB3   | 4:S:51:LEU:HD13  | 1.83                     | 0.59              |
| 1:A:260:PHE:CE2  | 1:A:274:LEU:CG   | 2.84                     | 0.58              |
| 1:A:516:ILE:HD13 | 1:A:551:LEU:CB   | 2.32                     | 0.58              |
| 2:B:90:ILE:HG12  | 2:B:98:LYS:CE    | 2.32                     | 0.58              |
| 2:B:182:ARG:HD2  | 2:B:217:GLU:CD   | 2.22                     | 0.58              |
| 2:B:257:LYS:HA   | 2:B:260:LEU:CG   | 2.33                     | 0.58              |
| 2:B:360:LEU:O    | 2:B:363:ILE:HB   | 2.03                     | 0.58              |
| 3:M:99:ILE:CG2   | 3:M:103:TYR:CE1  | 2.86                     | 0.58              |
| 3:M:218:LEU:HG   | 3:M:244:VAL:CG2  | 2.29                     | 0.58              |
| 3:M:225:VAL:HA   | 3:M:480:GLN:N    | 2.18                     | 0.58              |
| 3:M:347:PHE:CZ   | 3:M:350:VAL:CG1  | 2.85                     | 0.58              |

*Continued on next page...*

*Continued from previous page...*

| Atom-1           | Atom-2           | Interatomic distance (Å) | Clash overlap (Å) |
|------------------|------------------|--------------------------|-------------------|
| 1:A:97:SER:H     | 4:S:166:LYS:NZ   | 2.02                     | 0.58              |
| 1:A:176:TYR:CB   | 4:S:155:GLU:HG2  | 2.31                     | 0.58              |
| 1:A:270:LEU:CD1  | 1:A:274:LEU:HD23 | 2.32                     | 0.58              |
| 1:A:278:ILE:O    | 1:A:280:GLU:N    | 2.36                     | 0.58              |
| 1:A:607:LEU:C    | 1:A:609:LEU:N    | 2.55                     | 0.58              |
| 2:B:175:LEU:O    | 2:B:178:ILE:HB   | 2.03                     | 0.58              |
| 2:B:263:PRO:HA   | 2:B:266:VAL:CG2  | 2.33                     | 0.58              |
| 2:B:355:ASN:O    | 2:B:359:LEU:HD23 | 2.03                     | 0.58              |
| 2:B:549:LEU:HD22 | 2:B:611:ALA:HB3  | 1.72                     | 0.58              |
| 2:B:562:ASN:CB   | 2:B:580:TYR:HB2  | 2.30                     | 0.58              |
| 3:M:6:TYR:CD2    | 3:M:16:PHE:O     | 2.56                     | 0.58              |
| 3:M:245:ASP:O    | 3:M:246:VAL:HG22 | 2.03                     | 0.58              |
| 3:M:290:PHE:HZ   | 3:M:297:PHE:CG   | 2.11                     | 0.58              |
| 3:M:410:VAL:HG13 | 3:M:412:ARG:HH11 | 1.66                     | 0.58              |
| 4:S:8:PHE:CE1    | 4:S:84:TYR:HB3   | 1.80                     | 0.58              |
| 1:A:180:LYS:CE   | 4:S:156:LEU:HD11 | 2.33                     | 0.58              |
| 1:A:223:CYS:SG   | 1:A:262:ASN:ND2  | 2.66                     | 0.58              |
| 1:A:638:LEU:HD12 | 2:B:518:ILE:HG22 | 1.77                     | 0.58              |
| 2:B:87:VAL:CG2   | 2:B:119:SER:HA   | 2.33                     | 0.58              |
| 2:B:120:ILE:C    | 2:B:153:ILE:HG21 | 2.23                     | 0.58              |
| 2:B:177:ILE:CD1  | 2:B:196:LEU:CD2  | 2.82                     | 0.58              |
| 2:B:278:PRO:HB3  | 2:B:288:TYR:C    | 2.16                     | 0.58              |
| 2:B:534:ILE:O    | 2:B:535:GLN:C    | 2.38                     | 0.58              |
| 2:B:537:PHE:CB   | 2:B:598:LEU:CD1  | 2.30                     | 0.58              |
| 2:B:563:PHE:HA   | 2:B:566:ALA:HB3  | 1.84                     | 0.58              |
| 2:B:569:THR:CA   | 2:B:571:SER:H    | 2.16                     | 0.58              |
| 2:B:589:SER:OG   | 2:B:618:PHE:CZ   | 2.46                     | 0.58              |
| 3:M:56:VAL:O     | 3:M:56:VAL:CG1   | 2.50                     | 0.58              |
| 3:M:217:ASP:HB2  | 3:M:470:ALA:CA   | 2.33                     | 0.58              |
| 3:M:235:LEU:HD13 | 3:M:306:LEU:HB3  | 1.85                     | 0.58              |
| 3:M:245:ASP:N    | 3:M:472:TYR:CD2  | 2.57                     | 0.58              |
| 3:M:443:SER:OG   | 3:M:448:TYR:N    | 2.35                     | 0.58              |
| 1:A:229:ASN:O    | 1:A:230:PRO:C    | 2.36                     | 0.58              |
| 1:A:533:ILE:HG12 | 1:A:562:TRP:CZ2  | 2.39                     | 0.58              |
| 1:A:566:PHE:HD1  | 1:A:570:LYS:HA   | 1.68                     | 0.58              |
| 2:B:120:ILE:HG22 | 2:B:153:ILE:CG2  | 2.33                     | 0.58              |
| 2:B:181:TYR:CD2  | 2:B:218:CYS:CA   | 2.85                     | 0.58              |
| 2:B:237:ILE:CD1  | 2:B:309:LEU:HD21 | 2.34                     | 0.58              |
| 2:B:308:CYS:O    | 2:B:311:TYR:N    | 2.37                     | 0.58              |
| 2:B:588:ILE:CG2  | 2:B:618:PHE:CE1  | 2.86                     | 0.58              |
| 2:B:588:ILE:CG2  | 2:B:618:PHE:CZ   | 2.78                     | 0.58              |

*Continued on next page...*

*Continued from previous page...*

| Atom-1           | Atom-2           | Interatomic distance (Å) | Clash overlap (Å) |
|------------------|------------------|--------------------------|-------------------|
| 3:M:9:ASP:HA     | 3:M:75:TRP:HD1   | 1.67                     | 0.58              |
| 3:M:19:LEU:CD1   | 3:M:24:ALA:CB    | 2.80                     | 0.58              |
| 3:M:442:GLN:OE1  | 3:M:442:GLN:HA   | 2.02                     | 0.58              |
| 4:S:53:THR:N     | 4:S:69:ASN:CB    | 2.58                     | 0.58              |
| 2:B:51:LEU:HD22  | 2:B:59:VAL:HG13  | 1.84                     | 0.58              |
| 2:B:497:LEU:HD11 | 2:B:508:ARG:CZ   | 2.31                     | 0.58              |
| 2:B:501:THR:C    | 2:B:508:ARG:HH21 | 2.06                     | 0.58              |
| 3:M:215:TYR:CB   | 3:M:469:GLY:H    | 2.13                     | 0.58              |
| 3:M:219:LEU:HA   | 3:M:440:ILE:HA   | 1.85                     | 0.58              |
| 1:A:190:LEU:HD11 | 1:A:228:LYS:HE3  | 1.85                     | 0.58              |
| 1:A:338:PHE:HE2  | 1:A:352:PHE:CZ   | 2.21                     | 0.58              |
| 1:A:634:ASN:OD1  | 2:B:553:ALA:C    | 2.41                     | 0.58              |
| 2:B:120:ILE:HG21 | 2:B:154:ILE:HG13 | 1.82                     | 0.58              |
| 2:B:177:ILE:HD11 | 2:B:195:ILE:HG22 | 1.84                     | 0.58              |
| 2:B:299:LEU:C    | 2:B:299:LEU:HD13 | 2.24                     | 0.58              |
| 2:B:452:LYS:NZ   | 2:B:456:ASP:CG   | 2.55                     | 0.58              |
| 3:M:317:MET:CG   | 3:M:320:ILE:O    | 2.51                     | 0.58              |
| 3:M:354:ASP:HB2  | 3:M:440:ILE:CD1  | 2.33                     | 0.58              |
| 3:M:360:LEU:CD2  | 3:M:362:PHE:HE2  | 2.14                     | 0.58              |
| 1:A:581:LEU:HG   | 1:A:607:LEU:HD11 | 1.86                     | 0.58              |
| 2:B:29:LYS:O     | 2:B:32:GLU:CG    | 2.50                     | 0.58              |
| 2:B:50:LEU:CD2   | 2:B:62:ALA:HB2   | 2.34                     | 0.58              |
| 2:B:133:GLU:O    | 2:B:168:MET:CE   | 2.51                     | 0.58              |
| 2:B:174:ALA:CB   | 2:B:211:ALA:HB1  | 2.31                     | 0.58              |
| 2:B:188:TYR:O    | 2:B:192:LEU:HD13 | 2.02                     | 0.58              |
| 2:B:316:THR:HG23 | 3:M:90:PHE:CZ    | 2.39                     | 0.58              |
| 2:B:346:THR:CG2  | 2:B:350:THR:HG21 | 2.29                     | 0.58              |
| 3:M:380:ARG:NH1  | 3:M:412:ARG:HD2  | 2.19                     | 0.58              |
| 1:A:488:ARG:CG   | 1:A:522:PHE:CD2  | 2.87                     | 0.58              |
| 2:B:29:LYS:O     | 2:B:30:LEU:C     | 2.40                     | 0.58              |
| 2:B:37:TYR:HH    | 2:B:46:GLN:NE2   | 0.27                     | 0.58              |
| 3:M:1:MET:HA     | 3:M:81:SER:OG    | 2.04                     | 0.58              |
| 3:M:437:TYR:HB2  | 3:M:439:TYR:CE1  | 2.38                     | 0.58              |
| 4:S:55:PRO:HB3   | 4:S:71:GLU:HA    | 1.86                     | 0.58              |
| 4:S:117:ASN:HB2  | 4:S:120:ASP:OD2  | 2.04                     | 0.58              |
| 1:A:402:ILE:C    | 1:A:404:GLN:N    | 2.56                     | 0.58              |
| 2:B:30:LEU:HD12  | 2:B:30:LEU:O     | 2.04                     | 0.58              |
| 2:B:37:TYR:CE2   | 2:B:46:GLN:OE1   | 2.56                     | 0.58              |
| 2:B:83:PHE:CZ    | 2:B:105:LEU:HG   | 2.39                     | 0.58              |
| 2:B:90:ILE:O     | 2:B:98:LYS:HE2   | 2.04                     | 0.58              |
| 2:B:159:LYS:HG3  | 2:B:191:GLU:OE1  | 2.03                     | 0.58              |

*Continued on next page...*

*Continued from previous page...*

| Atom-1           | Atom-2           | Interatomic distance (Å) | Clash overlap (Å) |
|------------------|------------------|--------------------------|-------------------|
| 2:B:267:ASP:N    | 2:B:289:PRO:HB2  | 2.03                     | 0.58              |
| 3:M:101:LEU:CD2  | 3:M:106:LYS:CG   | 2.81                     | 0.58              |
| 3:M:218:LEU:N    | 3:M:218:LEU:HD12 | 2.18                     | 0.58              |
| 3:M:242:GLY:O    | 3:M:301:GLU:HA   | 2.04                     | 0.58              |
| 3:M:347:PHE:HE2  | 3:M:352:GLN:N    | 2.02                     | 0.58              |
| 1:A:68:THR:CB    | 4:S:167:ILE:N    | 2.66                     | 0.58              |
| 1:A:101:GLN:CG   | 4:S:167:ILE:HG13 | 2.31                     | 0.58              |
| 1:A:102:GLN:HG2  | 4:S:166:LYS:CA   | 2.22                     | 0.58              |
| 1:A:104:ARG:CG   | 1:A:145:ILE:HG21 | 2.34                     | 0.58              |
| 1:A:322:PHE:CB   | 1:A:330:LEU:HD21 | 2.32                     | 0.58              |
| 1:A:555:LEU:HD12 | 1:A:585:PHE:CE1  | 2.39                     | 0.58              |
| 1:A:581:LEU:CD2  | 1:A:607:LEU:HD21 | 2.33                     | 0.58              |
| 1:A:596:VAL:O    | 1:A:599:ARG:HB2  | 2.03                     | 0.58              |
| 2:B:87:VAL:O     | 2:B:88:LYS:C     | 2.39                     | 0.58              |
| 2:B:334:MET:CB   | 2:B:369:LEU:HD23 | 2.34                     | 0.58              |
| 2:B:367:SER:OG   | 2:B:401:THR:CB   | 2.51                     | 0.58              |
| 2:B:400:SER:CA   | 2:B:439:CYS:SG   | 2.91                     | 0.58              |
| 2:B:403:ILE:HG22 | 2:B:411:ILE:CD1  | 2.33                     | 0.58              |
| 1:A:189:PHE:HD2  | 1:A:225:LEU:HD11 | 1.62                     | 0.57              |
| 1:A:204:VAL:HG13 | 1:A:239:LEU:HD11 | 1.86                     | 0.57              |
| 1:A:384:LEU:HD13 | 1:A:435:ILE:HG23 | 1.80                     | 0.57              |
| 1:A:438:ALA:O    | 1:A:441:TYR:CD1  | 2.56                     | 0.57              |
| 1:A:464:ILE:HG23 | 1:A:465:SER:HA   | 1.86                     | 0.57              |
| 1:A:516:ILE:HG12 | 1:A:551:LEU:CD1  | 2.34                     | 0.57              |
| 1:A:625:LEU:O    | 1:A:626:SER:C    | 2.36                     | 0.57              |
| 2:B:42:ILE:C     | 2:B:46:GLN:OE1   | 2.43                     | 0.57              |
| 2:B:178:ILE:CD1  | 2:B:215:TYR:N    | 2.67                     | 0.57              |
| 2:B:189:HIS:CE1  | 2:B:193:LEU:HD11 | 2.38                     | 0.57              |
| 2:B:223:LEU:HD22 | 2:B:255:TYR:CZ   | 2.34                     | 0.57              |
| 2:B:278:PRO:CG   | 2:B:289:PRO:O    | 2.51                     | 0.57              |
| 2:B:350:THR:HB   | 2:B:352:ASN:HD22 | 1.69                     | 0.57              |
| 2:B:470:ALA:O    | 2:B:473:ASN:N    | 2.35                     | 0.57              |
| 2:B:508:ARG:O    | 2:B:509:ALA:C    | 2.30                     | 0.57              |
| 2:B:519:ALA:HB2  | 2:B:555:LEU:HD13 | 1.86                     | 0.57              |
| 2:B:534:ILE:O    | 2:B:536:ASN:N    | 2.37                     | 0.57              |
| 3:M:435:LEU:HB2  | 3:M:437:TYR:CE1  | 2.39                     | 0.57              |
| 1:A:241:TYR:HD2  | 1:A:242:GLU:N    | 2.01                     | 0.57              |
| 1:A:355:LEU:O    | 1:A:359:LEU:HG   | 2.04                     | 0.57              |
| 1:A:603:VAL:O    | 1:A:606:PHE:N    | 2.36                     | 0.57              |
| 1:A:637:GLU:HG3  | 2:B:515:PHE:C    | 2.24                     | 0.57              |
| 2:B:123:LEU:HD22 | 2:B:138:ALA:HB1  | 1.86                     | 0.57              |

*Continued on next page...*



*Continued from previous page...*

| Atom-1           | Atom-2           | Interatomic distance (Å) | Clash overlap (Å) |
|------------------|------------------|--------------------------|-------------------|
| 2:B:175:LEU:CD2  | 2:B:210:CYS:HB3  | 2.34                     | 0.57              |
| 2:B:200:MET:CE   | 2:B:232:ARG:H    | 2.15                     | 0.57              |
| 2:B:219:TYR:CA   | 2:B:223:LEU:CD2  | 2.82                     | 0.57              |
| 2:B:247:TYR:OH   | 3:M:91:THR:CB    | 2.51                     | 0.57              |
| 2:B:278:PRO:HD3  | 2:B:290:SER:HA   | 1.85                     | 0.57              |
| 2:B:310:ILE:O    | 2:B:311:TYR:O    | 2.21                     | 0.57              |
| 2:B:433:VAL:HG12 | 2:B:474:VAL:HG21 | 0.60                     | 0.57              |
| 2:B:537:PHE:CZ   | 2:B:599:ALA:HA   | 2.39                     | 0.57              |
| 3:M:52:ASP:CA    | 3:M:67:SER:CA    | 2.82                     | 0.57              |
| 3:M:218:LEU:HG   | 3:M:472:TYR:CE2  | 2.32                     | 0.57              |
| 3:M:380:ARG:N    | 3:M:412:ARG:O    | 2.37                     | 0.57              |
| 3:M:440:ILE:O    | 3:M:440:ILE:HG22 | 2.03                     | 0.57              |
| 4:S:34:GLN:CD    | 4:S:58:LEU:HD21  | 2.17                     | 0.57              |
| 4:S:107:GLU:HG2  | 4:S:146:VAL:HG21 | 1.85                     | 0.57              |
| 1:A:92:LEU:HD13  | 1:A:123:LEU:CD1  | 2.27                     | 0.57              |
| 1:A:101:GLN:O    | 4:S:167:ILE:CD1  | 2.53                     | 0.57              |
| 1:A:189:PHE:CG   | 1:A:225:LEU:HD21 | 2.37                     | 0.57              |
| 1:A:637:GLU:HB3  | 2:B:516:GLY:HA3  | 1.80                     | 0.57              |
| 2:B:44:PRO:O     | 2:B:47:LEU:CB    | 2.48                     | 0.57              |
| 2:B:178:ILE:CG2  | 2:B:214:ALA:CA   | 2.83                     | 0.57              |
| 2:B:178:ILE:CA   | 2:B:218:CYS:HB2  | 2.18                     | 0.57              |
| 2:B:189:HIS:NE2  | 2:B:222:HIS:HB3  | 2.20                     | 0.57              |
| 2:B:306:LEU:HD22 | 2:B:321:CYS:SG   | 2.45                     | 0.57              |
| 2:B:472:VAL:HG13 | 2:B:510:GLY:C    | 2.24                     | 0.57              |
| 2:B:508:ARG:O    | 2:B:512:VAL:CG2  | 2.43                     | 0.57              |
| 2:B:542:PRO:CA   | 2:B:602:ASP:CG   | 2.60                     | 0.57              |
| 3:M:2:TYR:C      | 3:M:3:LEU:HD12   | 2.24                     | 0.57              |
| 4:S:80:TYR:CE2   | 4:S:110:ASP:HB2  | 2.39                     | 0.57              |
| 1:A:132:LEU:HD23 | 1:A:143:VAL:HG22 | 1.86                     | 0.57              |
| 1:A:485:PRO:C    | 1:A:486:SER:O    | 2.39                     | 0.57              |
| 1:A:492:ILE:HD11 | 1:A:522:PHE:HB3  | 1.85                     | 0.57              |
| 1:A:627:GLU:O    | 1:A:630:PRO:HD2  | 2.05                     | 0.57              |
| 2:B:64:LYS:CG    | 2:B:100:LEU:HD11 | 2.34                     | 0.57              |
| 2:B:559:ASP:OD2  | 2:B:563:PHE:CE1  | 2.57                     | 0.57              |
| 3:M:17:GLN:H     | 3:M:118:TYR:HE1  | 1.51                     | 0.57              |
| 3:M:74:TYR:HD2   | 3:M:109:LEU:O    | 1.88                     | 0.57              |
| 3:M:223:HIS:HB3  | 3:M:478:ASN:C    | 2.24                     | 0.57              |
| 4:S:15:ARG:HD2   | 4:S:122:ILE:HG13 | 1.84                     | 0.57              |
| 1:A:234:ILE:HG23 | 1:A:267:GLU:HG2  | 1.86                     | 0.57              |
| 1:A:253:ILE:HG12 | 1:A:281:LEU:CG   | 2.35                     | 0.57              |
| 1:A:594:PHE:HD2  | 2:B:474:VAL:HG23 | 1.70                     | 0.57              |

*Continued on next page...*

*Continued from previous page...*

| Atom-1           | Atom-2           | Interatomic distance (Å) | Clash overlap (Å) |
|------------------|------------------|--------------------------|-------------------|
| 2:B:134:LEU:O    | 2:B:136:CYS:N    | 2.37                     | 0.57              |
| 2:B:158:VAL:HG21 | 2:B:177:ILE:HG13 | 1.86                     | 0.57              |
| 2:B:162:VAL:HG21 | 2:B:195:ILE:CB   | 2.31                     | 0.57              |
| 2:B:313:SER:O    | 2:B:315:PRO:HD3  | 2.04                     | 0.57              |
| 2:B:396:ILE:CD1  | 2:B:418:TYR:HE2  | 2.11                     | 0.57              |
| 3:M:374:TYR:CZ   | 3:M:390:ILE:HD13 | 2.40                     | 0.57              |
| 4:S:8:PHE:HA     | 4:S:13:GLN:O     | 2.04                     | 0.57              |
| 4:S:35:VAL:HB    | 4:S:77:TYR:OH    | 2.05                     | 0.57              |
| 1:A:183:THR:HG21 | 4:S:134:GLU:HA   | 1.87                     | 0.57              |
| 1:A:253:ILE:CG1  | 1:A:281:LEU:HD22 | 2.35                     | 0.57              |
| 1:A:637:GLU:HB2  | 2:B:551:LEU:CD2  | 2.35                     | 0.57              |
| 2:B:17:VAL:O     | 2:B:18:ILE:O     | 2.21                     | 0.57              |
| 2:B:108:PHE:CZ   | 2:B:115:LEU:CD2  | 2.88                     | 0.57              |
| 2:B:251:LEU:O    | 2:B:254:LYS:N    | 2.36                     | 0.57              |
| 3:M:114:ILE:O    | 3:M:118:TYR:N    | 2.38                     | 0.57              |
| 3:M:121:ILE:HG23 | 3:M:125:PHE:HE1  | 1.69                     | 0.57              |
| 3:M:317:MET:HB2  | 3:M:322:LEU:CB   | 2.35                     | 0.57              |
| 4:S:14:PRO:HB3   | 4:S:36:TYR:CE1   | 2.33                     | 0.57              |
| 4:S:111:ARG:HB2  | 4:S:150:VAL:CG2  | 2.32                     | 0.57              |
| 1:A:105:VAL:HG23 | 4:S:167:ILE:CG2  | 2.27                     | 0.57              |
| 1:A:600:SER:C    | 1:A:602:GLU:N    | 2.56                     | 0.57              |
| 1:A:630:PRO:HG2  | 2:B:614:ILE:HG23 | 1.86                     | 0.57              |
| 1:A:637:GLU:HG2  | 2:B:516:GLY:N    | 1.95                     | 0.57              |
| 2:B:21:GLU:CA    | 2:B:24:ALA:CB    | 2.58                     | 0.57              |
| 2:B:64:LYS:N     | 2:B:100:LEU:HD13 | 2.19                     | 0.57              |
| 2:B:70:MET:HE1   | 2:B:107:ARG:CA   | 2.31                     | 0.57              |
| 2:B:155:LEU:C    | 2:B:157:THR:N    | 2.55                     | 0.57              |
| 2:B:231:ARG:O    | 2:B:234:CYS:N    | 2.38                     | 0.57              |
| 2:B:277:CYS:SG   | 2:B:292:GLU:OE2  | 2.62                     | 0.57              |
| 2:B:360:LEU:HD13 | 2:B:391:ALA:CA   | 2.25                     | 0.57              |
| 1:A:63:ASP:O     | 4:S:165:SER:CB   | 2.51                     | 0.57              |
| 1:A:114:PHE:CD2  | 1:A:153:ILE:HG23 | 2.40                     | 0.57              |
| 1:A:163:ALA:O    | 1:A:165:ASP:N    | 2.37                     | 0.57              |
| 1:A:225:LEU:CD1  | 1:A:233:PHE:CE2  | 2.81                     | 0.57              |
| 1:A:316:LEU:O    | 1:A:319:LEU:N    | 2.35                     | 0.57              |
| 1:A:535:ILE:O    | 1:A:535:ILE:HG22 | 2.04                     | 0.57              |
| 2:B:257:LYS:HA   | 2:B:260:LEU:HD21 | 1.86                     | 0.57              |
| 2:B:275:ARG:HE   | 2:B:275:ARG:CA   | 2.17                     | 0.57              |
| 2:B:340:ILE:HG21 | 2:B:373:LEU:HG   | 1.87                     | 0.57              |
| 2:B:451:MET:CE   | 2:B:489:ILE:HG12 | 2.34                     | 0.57              |
| 2:B:574:ASN:C    | 2:B:576:GLN:H    | 2.08                     | 0.57              |

*Continued on next page...*

*Continued from previous page...*

| Atom-1           | Atom-2           | Interatomic distance (Å) | Clash overlap (Å) |
|------------------|------------------|--------------------------|-------------------|
| 3:M:96:ILE:HD12  | 3:M:125:PHE:HA   | 1.86                     | 0.57              |
| 3:M:104:PHE:HD1  | 3:M:117:ASN:ND2  | 2.02                     | 0.57              |
| 3:M:235:LEU:HD22 | 3:M:307:SER:HA   | 1.86                     | 0.57              |
| 4:S:15:ARG:HH11  | 4:S:122:ILE:HD11 | 1.57                     | 0.57              |
| 4:S:55:PRO:HD3   | 4:S:71:GLU:HA    | 1.87                     | 0.57              |
| 1:A:255:ARG:C    | 1:A:257:LEU:N    | 2.56                     | 0.57              |
| 1:A:292:TYR:CD1  | 1:A:292:TYR:C    | 2.78                     | 0.57              |
| 2:B:50:LEU:HD21  | 2:B:61:ASP:HB2   | 1.86                     | 0.57              |
| 2:B:151:ALA:HA   | 2:B:180:LEU:HG   | 1.82                     | 0.57              |
| 2:B:208:ILE:HG21 | 2:B:240:LEU:HD11 | 1.87                     | 0.57              |
| 2:B:336:ASN:HB2  | 2:B:339:PHE:CE1  | 2.39                     | 0.57              |
| 2:B:453:TRP:HE3  | 2:B:453:TRP:HA   | 1.70                     | 0.57              |
| 2:B:519:ALA:HB1  | 2:B:555:LEU:CD1  | 2.35                     | 0.57              |
| 3:M:308:SER:O    | 3:M:312:GLN:N    | 2.33                     | 0.57              |
| 3:M:327:PHE:HE1  | 3:M:336:ASP:CG   | 2.07                     | 0.57              |
| 1:A:94:VAL:O     | 1:A:95:MET:C     | 2.39                     | 0.57              |
| 1:A:170:LEU:HB2  | 1:A:202:LYS:HG2  | 1.86                     | 0.57              |
| 1:A:421:PRO:CB   | 1:A:424:TYR:CD1  | 2.88                     | 0.57              |
| 1:A:465:SER:H    | 2:B:1:MET:CG     | 2.15                     | 0.57              |
| 1:A:563:CYS:HB3  | 1:A:621:LEU:CD1  | 2.23                     | 0.57              |
| 2:B:20:ARG:CD    | 2:B:21:GLU:N     | 2.68                     | 0.57              |
| 2:B:60:ARG:CD    | 2:B:96:LYS:HG2   | 2.25                     | 0.57              |
| 2:B:245:GLN:CB   | 2:B:309:LEU:HD11 | 2.34                     | 0.57              |
| 2:B:310:ILE:HG23 | 2:B:318:ILE:HG23 | 1.87                     | 0.57              |
| 2:B:399:LEU:O    | 2:B:400:SER:C    | 2.38                     | 0.57              |
| 3:M:60:LEU:HD23  | 3:M:60:LEU:C     | 2.22                     | 0.57              |
| 3:M:249:TYR:CE1  | 3:M:467:TYR:CZ   | 2.93                     | 0.57              |
| 4:S:111:ARG:CB   | 4:S:150:VAL:CG2  | 2.83                     | 0.57              |
| 1:A:67:LYS:N     | 4:S:165:SER:CB   | 2.44                     | 0.56              |
| 1:A:253:ILE:CG1  | 1:A:281:LEU:HB3  | 2.34                     | 0.56              |
| 2:B:80:GLN:HG3   | 2:B:115:LEU:HD21 | 1.87                     | 0.56              |
| 2:B:143:SER:CB   | 2:B:179:LYS:HB2  | 2.35                     | 0.56              |
| 2:B:197:LYS:CD   | 2:B:283:TYR:CD2  | 2.88                     | 0.56              |
| 2:B:387:ASP:HB3  | 2:B:391:ALA:HB3  | 1.86                     | 0.56              |
| 3:M:241:HIS:HB2  | 3:M:476:THR:HG22 | 1.84                     | 0.56              |
| 3:M:302:TYR:CE2  | 3:M:304:VAL:HB   | 2.40                     | 0.56              |
| 3:M:327:PHE:HE1  | 3:M:336:ASP:OD2  | 1.88                     | 0.56              |
| 4:S:50:PHE:HB3   | 4:S:76:ILE:HA    | 1.86                     | 0.56              |
| 4:S:93:GLU:HA    | 4:S:93:GLU:OE1   | 2.04                     | 0.56              |
| 2:B:24:ALA:CB    | 2:B:35:TYR:CD1   | 2.84                     | 0.56              |
| 2:B:275:ARG:N    | 2:B:295:ASN:CG   | 2.54                     | 0.56              |

*Continued on next page...*

*Continued from previous page...*

| Atom-1           | Atom-2           | Interatomic distance (Å) | Clash overlap (Å) |
|------------------|------------------|--------------------------|-------------------|
| 2:B:278:PRO:CB   | 2:B:292:GLU:OE1  | 2.52                     | 0.56              |
| 2:B:355:ASN:C    | 2:B:359:LEU:CD2  | 2.73                     | 0.56              |
| 2:B:498:THR:HG22 | 2:B:532:ARG:HB2  | 1.86                     | 0.56              |
| 3:M:432:THR:HG23 | 3:M:432:THR:O    | 2.03                     | 0.56              |
| 1:A:158:LEU:HG   | 1:A:162:ILE:HD11 | 1.86                     | 0.56              |
| 1:A:166:LEU:O    | 1:A:170:LEU:HD22 | 2.05                     | 0.56              |
| 1:A:186:PHE:CD1  | 1:A:224:GLU:CG   | 2.88                     | 0.56              |
| 1:A:384:LEU:HG   | 1:A:385:LYS:H    | 1.70                     | 0.56              |
| 1:A:404:GLN:OE1  | 2:B:7:ARG:CZ     | 2.53                     | 0.56              |
| 2:B:41:ASN:CG    | 2:B:43:ASN:OD1   | 2.44                     | 0.56              |
| 2:B:86:VAL:HG13  | 2:B:101:ILE:CG1  | 2.29                     | 0.56              |
| 2:B:123:LEU:O    | 2:B:127:LEU:HD12 | 2.04                     | 0.56              |
| 2:B:140:SER:N    | 2:B:172:GLU:OE1  | 2.37                     | 0.56              |
| 2:B:181:TYR:CE2  | 2:B:218:CYS:O    | 2.52                     | 0.56              |
| 2:B:199:LEU:O    | 2:B:200:MET:C    | 2.40                     | 0.56              |
| 2:B:220:ALA:HA   | 2:B:258:GLN:HB3  | 1.88                     | 0.56              |
| 2:B:436:LEU:HD12 | 2:B:454:LEU:HD21 | 1.87                     | 0.56              |
| 2:B:461:HIS:O    | 2:B:463:LEU:N    | 2.35                     | 0.56              |
| 2:B:468:LEU:O    | 2:B:472:VAL:HG23 | 2.06                     | 0.56              |
| 3:M:66:PHE:HB3   | 3:M:77:LEU:HD13  | 1.83                     | 0.56              |
| 3:M:96:ILE:CD1   | 3:M:125:PHE:HA   | 2.35                     | 0.56              |
| 3:M:222:PHE:CE1  | 3:M:439:TYR:CE1  | 2.93                     | 0.56              |
| 3:M:373:ALA:O    | 3:M:418:GLU:O    | 2.24                     | 0.56              |
| 3:M:403:THR:CG2  | 3:M:407:THR:HG1  | 2.16                     | 0.56              |
| 4:S:58:LEU:O     | 4:S:59:LEU:HB3   | 2.04                     | 0.56              |
| 1:A:97:SER:O     | 1:A:98:ASN:C     | 2.37                     | 0.56              |
| 1:A:99:LYS:HB3   | 4:S:163:THR:C    | 2.25                     | 0.56              |
| 1:A:170:LEU:CB   | 1:A:206:LYS:HG3  | 2.34                     | 0.56              |
| 1:A:214:VAL:N    | 4:S:143:GLU:OE1  | 2.39                     | 0.56              |
| 1:A:477:PHE:HE2  | 1:A:481:MET:SD   | 2.29                     | 0.56              |
| 2:B:21:GLU:C     | 2:B:24:ALA:HB3   | 2.25                     | 0.56              |
| 2:B:37:TYR:HE2   | 2:B:38:TYR:HE1   | 1.35                     | 0.56              |
| 2:B:278:PRO:CA   | 2:B:288:TYR:HB3  | 2.25                     | 0.56              |
| 2:B:352:ASN:ND2  | 2:B:352:ASN:H    | 2.02                     | 0.56              |
| 2:B:523:PHE:HD1  | 2:B:559:ASP:CG   | 2.09                     | 0.56              |
| 2:B:556:LEU:HD23 | 2:B:588:ILE:HD11 | 1.88                     | 0.56              |
| 2:B:559:ASP:C    | 2:B:563:PHE:HB2  | 2.26                     | 0.56              |
| 2:B:599:ALA:C    | 2:B:601:TYR:H    | 2.08                     | 0.56              |
| 3:M:222:PHE:CE1  | 3:M:240:ILE:HG23 | 2.28                     | 0.56              |
| 3:M:428:VAL:O    | 3:M:430:LEU:N    | 2.39                     | 0.56              |
| 4:S:17:VAL:CG2   | 4:S:19:PHE:CE1   | 2.81                     | 0.56              |

*Continued on next page...*

*Continued from previous page...*

| Atom-1           | Atom-2           | Interatomic distance (Å) | Clash overlap (Å) |
|------------------|------------------|--------------------------|-------------------|
| 1:A:141:VAL:CA   | 4:S:159:ALA:HB2  | 2.35                     | 0.56              |
| 1:A:274:LEU:O    | 1:A:275:LEU:C    | 2.37                     | 0.56              |
| 2:B:50:LEU:HD23  | 2:B:62:ALA:CB    | 2.35                     | 0.56              |
| 2:B:98:LYS:CD    | 2:B:138:ALA:HB2  | 2.31                     | 0.56              |
| 2:B:139:LEU:HD23 | 2:B:173:VAL:C    | 2.11                     | 0.56              |
| 2:B:247:TYR:OH   | 3:M:91:THR:CG2   | 2.53                     | 0.56              |
| 3:M:360:LEU:HD21 | 3:M:362:PHE:HE2  | 1.66                     | 0.56              |
| 3:M:372:ILE:HD13 | 3:M:424:PHE:CE1  | 2.40                     | 0.56              |
| 1:A:67:LYS:CB    | 4:S:166:LYS:N    | 2.69                     | 0.56              |
| 1:A:101:GLN:CG   | 4:S:167:ILE:CG2  | 2.53                     | 0.56              |
| 1:A:179:LYS:HE3  | 4:S:143:GLU:CA   | 2.33                     | 0.56              |
| 1:A:397:ASP:O    | 1:A:418:ILE:CD1  | 2.53                     | 0.56              |
| 3:M:5:PHE:HB2    | 3:M:125:PHE:CD2  | 2.40                     | 0.56              |
| 1:A:208:ASP:OD1  | 1:A:239:LEU:HD22 | 2.05                     | 0.56              |
| 1:A:275:LEU:HD12 | 1:A:308:ASP:CG   | 2.22                     | 0.56              |
| 1:A:481:MET:SD   | 1:A:518:CYS:SG   | 3.04                     | 0.56              |
| 1:A:556:VAL:HG21 | 1:A:603:VAL:CG1  | 2.36                     | 0.56              |
| 2:B:102:HIS:O    | 2:B:103:LEU:O    | 2.24                     | 0.56              |
| 2:B:108:PHE:CE2  | 2:B:112:ASP:HB3  | 2.41                     | 0.56              |
| 2:B:134:LEU:C    | 2:B:136:CYS:N    | 2.57                     | 0.56              |
| 2:B:175:LEU:HD21 | 2:B:210:CYS:CB   | 2.35                     | 0.56              |
| 2:B:215:TYR:CG   | 2:B:226:LEU:CD1  | 2.88                     | 0.56              |
| 2:B:277:CYS:HA   | 2:B:292:GLU:CA   | 2.34                     | 0.56              |
| 2:B:560:ILE:CA   | 2:B:564:LYS:H    | 2.17                     | 0.56              |
| 2:B:585:GLY:O    | 2:B:589:SER:N    | 2.29                     | 0.56              |
| 3:M:67:SER:CB    | 3:M:90:PHE:HB2   | 2.34                     | 0.56              |
| 3:M:219:LEU:HB2  | 3:M:472:TYR:C    | 2.14                     | 0.56              |
| 3:M:348:LYS:CG   | 3:M:405:THR:HG22 | 2.23                     | 0.56              |
| 1:A:121:LEU:HD23 | 1:A:121:LEU:C    | 2.24                     | 0.56              |
| 1:A:186:PHE:CZ   | 1:A:224:GLU:HG2  | 2.40                     | 0.56              |
| 1:A:215:VAL:HG22 | 1:A:243:ILE:HG13 | 1.87                     | 0.56              |
| 1:A:401:VAL:HG23 | 1:A:418:ILE:CA   | 2.36                     | 0.56              |
| 2:B:173:VAL:CG1  | 2:B:199:LEU:HD11 | 2.36                     | 0.56              |
| 2:B:275:ARG:HA   | 2:B:275:ARG:HE   | 1.70                     | 0.56              |
| 2:B:388:PRO:O    | 2:B:391:ALA:HB3  | 2.05                     | 0.56              |
| 2:B:560:ILE:HA   | 2:B:563:PHE:HB2  | 1.88                     | 0.56              |
| 3:M:49:ASP:CA    | 3:M:75:TRP:HH2   | 1.96                     | 0.56              |
| 3:M:338:PHE:CE2  | 3:M:415:ILE:CD1  | 2.89                     | 0.56              |
| 4:S:53:THR:CB    | 4:S:68:VAL:CA    | 2.84                     | 0.56              |
| 1:A:179:LYS:HZ1  | 4:S:149:ILE:HG12 | 1.70                     | 0.56              |
| 1:A:225:LEU:HB3  | 1:A:233:PHE:HE1  | 1.66                     | 0.56              |

*Continued on next page...*

*Continued from previous page...*

| Atom-1           | Atom-2           | Interatomic distance (Å) | Clash overlap (Å) |
|------------------|------------------|--------------------------|-------------------|
| 1:A:384:LEU:CG   | 1:A:385:LYS:N    | 2.68                     | 0.56              |
| 2:B:81:LEU:O     | 2:B:82:TYR:C     | 2.35                     | 0.56              |
| 2:B:178:ILE:CG1  | 2:B:215:TYR:CA   | 2.78                     | 0.56              |
| 2:B:189:HIS:NE2  | 2:B:193:LEU:CD1  | 2.61                     | 0.56              |
| 2:B:189:HIS:CD2  | 2:B:222:HIS:CB   | 2.87                     | 0.56              |
| 2:B:226:LEU:HG   | 2:B:255:TYR:CE2  | 2.40                     | 0.56              |
| 2:B:245:GLN:HG2  | 2:B:309:LEU:HD11 | 1.84                     | 0.56              |
| 2:B:350:THR:CG2  | 2:B:352:ASN:HD21 | 2.18                     | 0.56              |
| 2:B:374:PHE:HD2  | 2:B:402:LEU:HD21 | 1.71                     | 0.56              |
| 2:B:578:PRO:HB3  | 2:B:579:PRO:CD   | 2.33                     | 0.56              |
| 3:M:4:SER:O      | 3:M:79:SER:N     | 2.39                     | 0.56              |
| 3:M:18:TYR:CE2   | 3:M:20:LEU:CD2   | 2.86                     | 0.56              |
| 3:M:105:ASP:O    | 3:M:106:LYS:HB3  | 2.04                     | 0.56              |
| 3:M:212:ASN:HB3  | 3:M:250:LEU:CD2  | 2.31                     | 0.56              |
| 4:S:50:PHE:HA    | 4:S:75:ILE:O     | 2.06                     | 0.56              |
| 4:S:68:VAL:O     | 4:S:75:ILE:HD12  | 2.06                     | 0.56              |
| 1:A:88:ASN:HB3   | 1:A:120:ILE:HG23 | 1.87                     | 0.56              |
| 1:A:107:TYR:CD1  | 1:A:146:ALA:HA   | 2.41                     | 0.56              |
| 1:A:162:ILE:O    | 1:A:165:ASP:HB2  | 2.06                     | 0.56              |
| 1:A:167:PHE:CD1  | 1:A:202:LYS:HB2  | 2.41                     | 0.56              |
| 1:A:178:ARG:HB2  | 1:A:214:VAL:CG2  | 2.35                     | 0.56              |
| 2:B:214:ALA:C    | 2:B:216:LYS:H    | 2.09                     | 0.56              |
| 2:B:483:PRO:HA   | 2:B:486:HIS:HB2  | 1.88                     | 0.56              |
| 2:B:519:ALA:O    | 2:B:523:PHE:N    | 2.39                     | 0.56              |
| 3:M:223:HIS:HB3  | 3:M:479:PHE:N    | 2.21                     | 0.56              |
| 1:A:155:THR:O    | 1:A:158:LEU:HB3  | 2.06                     | 0.55              |
| 1:A:255:ARG:HD3  | 4:S:141:VAL:C    | 2.25                     | 0.55              |
| 1:A:295:VAL:HG11 | 1:A:337:LEU:HD13 | 1.88                     | 0.55              |
| 2:B:172:GLU:O    | 2:B:174:ALA:N    | 2.38                     | 0.55              |
| 2:B:174:ALA:HB3  | 2:B:211:ALA:HB2  | 1.88                     | 0.55              |
| 2:B:215:TYR:CD2  | 2:B:219:TYR:CE1  | 2.79                     | 0.55              |
| 2:B:307:ASN:HD22 | 2:B:336:ASN:HD21 | 1.43                     | 0.55              |
| 2:B:340:ILE:HG13 | 2:B:373:LEU:CG   | 2.36                     | 0.55              |
| 3:M:101:LEU:HD13 | 3:M:109:LEU:HD13 | 1.88                     | 0.55              |
| 3:M:262:THR:HG23 | 3:M:267:ILE:HG12 | 1.87                     | 0.55              |
| 3:M:437:TYR:HD1  | 3:M:437:TYR:H    | 1.51                     | 0.55              |
| 2:B:69:ILE:O     | 2:B:70:MET:C     | 2.36                     | 0.55              |
| 2:B:512:VAL:HB   | 2:B:551:LEU:CD1  | 2.34                     | 0.55              |
| 2:B:596:LEU:HD13 | 2:B:611:ALA:C    | 2.27                     | 0.55              |
| 3:M:16:PHE:CE2   | 3:M:125:PHE:CE2  | 2.94                     | 0.55              |
| 3:M:18:TYR:OH    | 3:M:126:ASN:HB2  | 2.05                     | 0.55              |

*Continued on next page...*

*Continued from previous page...*

| Atom-1           | Atom-2           | Interatomic distance (Å) | Clash overlap (Å) |
|------------------|------------------|--------------------------|-------------------|
| 3:M:216:VAL:HB   | 3:M:472:TYR:OH   | 2.06                     | 0.55              |
| 3:M:224:VAL:O    | 3:M:479:PHE:HA   | 2.04                     | 0.55              |
| 3:M:244:VAL:O    | 3:M:299:LEU:HB3  | 2.06                     | 0.55              |
| 3:M:272:LEU:HD22 | 3:M:278:ILE:CG2  | 2.35                     | 0.55              |
| 1:A:99:LYS:HG2   | 1:A:101:GLN:N    | 2.21                     | 0.55              |
| 1:A:283:GLU:OE1  | 1:A:318:ARG:NH2  | 2.38                     | 0.55              |
| 1:A:631:SER:C    | 2:B:554:LYS:HG3  | 2.24                     | 0.55              |
| 2:B:10:SER:O     | 2:B:13:ASP:N     | 2.38                     | 0.55              |
| 2:B:50:LEU:CG    | 2:B:58:GLU:O     | 2.51                     | 0.55              |
| 2:B:139:LEU:HD22 | 2:B:173:VAL:HG13 | 1.89                     | 0.55              |
| 2:B:267:ASP:CA   | 2:B:289:PRO:CG   | 2.84                     | 0.55              |
| 2:B:537:PHE:C    | 2:B:539:ASN:H    | 2.09                     | 0.55              |
| 3:M:300:LEU:O    | 3:M:300:LEU:HD12 | 2.07                     | 0.55              |
| 4:S:15:ARG:NH2   | 4:S:118:GLU:CD   | 2.59                     | 0.55              |
| 1:A:114:PHE:CD2  | 1:A:153:ILE:HG12 | 2.42                     | 0.55              |
| 1:A:215:VAL:CG2  | 1:A:243:ILE:CG1  | 2.79                     | 0.55              |
| 1:A:516:ILE:HG21 | 1:A:551:LEU:HA   | 1.88                     | 0.55              |
| 2:B:108:PHE:CE2  | 2:B:115:LEU:CD2  | 2.90                     | 0.55              |
| 2:B:116:THR:HG22 | 2:B:150:LEU:CG   | 2.36                     | 0.55              |
| 2:B:120:ILE:HG13 | 2:B:150:LEU:CB   | 2.32                     | 0.55              |
| 2:B:430:ILE:O    | 2:B:433:VAL:HB   | 2.07                     | 0.55              |
| 3:M:253:ASN:N    | 3:M:254:PRO:CD   | 2.70                     | 0.55              |
| 4:S:89:VAL:CG1   | 4:S:98:ILE:CG2   | 2.76                     | 0.55              |
| 1:A:185:LEU:O    | 1:A:189:PHE:CD2  | 2.59                     | 0.55              |
| 1:A:279:LEU:HA   | 1:A:282:MET:HG2  | 1.89                     | 0.55              |
| 1:A:301:GLY:O    | 1:A:302:ASN:CB   | 2.52                     | 0.55              |
| 1:A:441:TYR:O    | 1:A:442:SER:C    | 2.44                     | 0.55              |
| 1:A:441:TYR:C    | 1:A:443:SER:N    | 2.58                     | 0.55              |
| 1:A:606:PHE:CD2  | 1:A:629:LEU:HG   | 2.41                     | 0.55              |
| 2:B:159:LYS:CD   | 2:B:191:GLU:OE1  | 2.55                     | 0.55              |
| 2:B:225:LEU:HD11 | 2:B:283:TYR:CE1  | 2.39                     | 0.55              |
| 3:M:65:TYR:CG    | 3:M:86:PRO:CB    | 2.89                     | 0.55              |
| 3:M:215:TYR:O    | 3:M:246:VAL:CG1  | 2.55                     | 0.55              |
| 3:M:443:SER:OG   | 3:M:447:ILE:HG13 | 2.05                     | 0.55              |
| 1:A:96:SER:HB3   | 1:A:127:LEU:CG   | 2.37                     | 0.55              |
| 1:A:136:GLY:O    | 1:A:139:ASP:CA   | 2.55                     | 0.55              |
| 1:A:606:PHE:HB3  | 1:A:629:LEU:HD12 | 1.88                     | 0.55              |
| 2:B:177:ILE:HD13 | 2:B:196:LEU:CG   | 2.34                     | 0.55              |
| 2:B:453:TRP:HA   | 2:B:453:TRP:CE3  | 2.40                     | 0.55              |
| 2:B:559:ASP:C    | 2:B:563:PHE:H    | 2.05                     | 0.55              |
| 3:M:101:LEU:HD12 | 3:M:109:LEU:HD12 | 1.88                     | 0.55              |

*Continued on next page...*

*Continued from previous page...*

| Atom-1           | Atom-2           | Interatomic distance (Å) | Clash overlap (Å) |
|------------------|------------------|--------------------------|-------------------|
| 3:M:217:ASP:CB   | 3:M:471:LYS:CA   | 2.85                     | 0.55              |
| 3:M:262:THR:HG22 | 3:M:264:GLY:HA2  | 1.88                     | 0.55              |
| 3:M:262:THR:C    | 3:M:264:GLY:N    | 2.55                     | 0.55              |
| 3:M:327:PHE:CD2  | 3:M:430:LEU:HD22 | 2.41                     | 0.55              |
| 3:M:358:ILE:HB   | 3:M:397:TRP:HE3  | 1.70                     | 0.55              |
| 4:S:75:ILE:HG23  | 4:S:86:THR:CG2   | 2.36                     | 0.55              |
| 1:A:528:ASN:C    | 1:A:530:ASN:N    | 2.52                     | 0.55              |
| 1:A:575:LYS:HE3  | 1:A:611:LEU:CD2  | 2.35                     | 0.55              |
| 1:A:586:GLU:CB   | 1:A:604:LEU:CD1  | 2.84                     | 0.55              |
| 1:A:609:LEU:HD13 | 1:A:609:LEU:C    | 2.26                     | 0.55              |
| 2:B:175:LEU:HD11 | 2:B:210:CYS:CB   | 2.37                     | 0.55              |
| 3:M:124:ILE:HG23 | 3:M:128:CYS:SG   | 2.47                     | 0.55              |
| 3:M:131:ALA:O    | 3:M:132:GLY:C    | 2.42                     | 0.55              |
| 3:M:376:ILE:CD1  | 3:M:415:ILE:HG12 | 2.37                     | 0.55              |
| 4:S:21:THR:HB    | 4:S:22:PRO:CD    | 2.33                     | 0.55              |
| 1:A:118:SER:O    | 1:A:122:MET:HG2  | 2.07                     | 0.55              |
| 1:A:182:ILE:HD13 | 1:A:218:ALA:CA   | 2.36                     | 0.55              |
| 1:A:398:GLU:O    | 1:A:420:ILE:CB   | 2.55                     | 0.55              |
| 1:A:429:VAL:HG11 | 1:A:469:LEU:CD1  | 2.36                     | 0.55              |
| 1:A:487:MET:O    | 1:A:488:ARG:C    | 2.43                     | 0.55              |
| 1:A:624:LEU:O    | 2:B:617:LEU:CD1  | 2.54                     | 0.55              |
| 2:B:60:ARG:O     | 2:B:63:MET:N     | 2.34                     | 0.55              |
| 2:B:83:PHE:HE2   | 2:B:119:SER:N    | 2.03                     | 0.55              |
| 2:B:158:VAL:HG12 | 2:B:195:ILE:HD13 | 1.87                     | 0.55              |
| 2:B:159:LYS:N    | 2:B:195:ILE:HD13 | 2.22                     | 0.55              |
| 2:B:286:ILE:O    | 2:B:287:GLU:C    | 2.45                     | 0.55              |
| 2:B:323:ASN:O    | 2:B:327:GLN:HG2  | 2.07                     | 0.55              |
| 3:M:2:TYR:OH     | 3:M:62:VAL:CG1   | 2.55                     | 0.55              |
| 3:M:16:PHE:CE2   | 3:M:18:TYR:HB2   | 2.41                     | 0.55              |
| 3:M:293:PRO:C    | 3:M:294:ASP:O    | 2.30                     | 0.55              |
| 3:M:331:LEU:HD22 | 3:M:426:LYS:NZ   | 2.22                     | 0.55              |
| 4:S:9:ASN:ND2    | 4:S:13:GLN:HG2   | 2.17                     | 0.55              |
| 1:A:396:VAL:O    | 1:A:396:VAL:HG12 | 2.05                     | 0.55              |
| 1:A:451:ASN:OD1  | 1:A:480:LEU:CD1  | 2.55                     | 0.55              |
| 2:B:108:PHE:O    | 2:B:109:ALA:C    | 2.31                     | 0.55              |
| 2:B:132:SER:C    | 2:B:169:VAL:CG2  | 2.76                     | 0.55              |
| 2:B:450:VAL:O    | 2:B:453:TRP:HB2  | 2.07                     | 0.55              |
| 2:B:546:CYS:N    | 2:B:607:ILE:CG2  | 2.70                     | 0.55              |
| 3:M:100:LEU:HD22 | 3:M:101:LEU:H    | 1.71                     | 0.55              |
| 3:M:222:PHE:CE2  | 3:M:439:TYR:CE1  | 2.94                     | 0.55              |
| 3:M:222:PHE:HA   | 3:M:240:ILE:HA   | 1.88                     | 0.55              |

*Continued on next page...*



*Continued from previous page...*

| Atom-1           | Atom-2           | Interatomic distance (Å) | Clash overlap (Å) |
|------------------|------------------|--------------------------|-------------------|
| 3:M:223:HIS:N    | 3:M:479:PHE:CZ   | 2.74                     | 0.55              |
| 3:M:242:GLY:CA   | 3:M:474:THR:HG21 | 2.27                     | 0.55              |
| 3:M:269:ILE:C    | 3:M:302:TYR:CD1  | 2.80                     | 0.55              |
| 4:S:50:PHE:CA    | 4:S:75:ILE:O     | 2.55                     | 0.55              |
| 1:A:105:VAL:HG21 | 4:S:167:ILE:O    | 2.07                     | 0.55              |
| 1:A:236:LEU:C    | 1:A:238:PRO:HD2  | 2.27                     | 0.55              |
| 1:A:401:VAL:HG21 | 1:A:418:ILE:N    | 2.21                     | 0.55              |
| 1:A:495:ILE:CG2  | 1:A:515:CYS:HB3  | 2.37                     | 0.55              |
| 1:A:537:THR:HB   | 1:A:584:PHE:CZ   | 2.41                     | 0.55              |
| 1:A:582:ILE:CG1  | 1:A:607:LEU:HB2  | 2.37                     | 0.55              |
| 1:A:606:PHE:CZ   | 2:B:550:VAL:HG13 | 2.40                     | 0.55              |
| 2:B:45:GLN:C     | 2:B:47:LEU:N     | 2.59                     | 0.55              |
| 2:B:196:LEU:C    | 2:B:215:TYR:OH   | 2.46                     | 0.55              |
| 2:B:226:LEU:HD12 | 2:B:226:LEU:O    | 2.07                     | 0.55              |
| 2:B:277:CYS:CA   | 2:B:292:GLU:CG   | 2.80                     | 0.55              |
| 2:B:392:SER:HB3  | 2:B:424:PHE:HE2  | 1.71                     | 0.55              |
| 3:M:101:LEU:HD13 | 3:M:109:LEU:CD1  | 2.36                     | 0.55              |
| 3:M:443:SER:HA   | 3:M:447:ILE:HG13 | 1.89                     | 0.55              |
| 4:S:54:PRO:CA    | 4:S:57:LEU:HD13  | 2.37                     | 0.55              |
| 1:A:461:CYS:C    | 1:A:463:ASP:N    | 2.51                     | 0.54              |
| 2:B:70:MET:HB2   | 2:B:104:TYR:HE1  | 1.69                     | 0.54              |
| 2:B:120:ILE:CD1  | 2:B:142:LEU:HD22 | 2.34                     | 0.54              |
| 2:B:132:SER:CB   | 2:B:169:VAL:CG2  | 2.85                     | 0.54              |
| 2:B:177:ILE:CD1  | 2:B:196:LEU:HG   | 2.33                     | 0.54              |
| 2:B:193:LEU:O    | 2:B:195:ILE:CA   | 2.49                     | 0.54              |
| 2:B:249:ILE:HD13 | 2:B:320:SER:HB2  | 1.87                     | 0.54              |
| 2:B:306:LEU:CD1  | 2:B:325:LEU:CD2  | 2.85                     | 0.54              |
| 2:B:418:TYR:HD1  | 2:B:424:PHE:CD1  | 2.22                     | 0.54              |
| 2:B:534:ILE:CG1  | 2:B:595:VAL:HG23 | 2.37                     | 0.54              |
| 4:S:134:GLU:O    | 4:S:137:GLN:HG2  | 2.07                     | 0.54              |
| 1:A:105:VAL:CB   | 4:S:167:ILE:HA   | 2.37                     | 0.54              |
| 1:A:151:SER:CB   | 1:A:187:LYS:CB   | 2.74                     | 0.54              |
| 1:A:332:TYR:CE1  | 1:A:336:ILE:HD11 | 2.40                     | 0.54              |
| 1:A:506:LYS:O    | 1:A:507:GLN:HB2  | 2.07                     | 0.54              |
| 1:A:594:PHE:HD2  | 2:B:474:VAL:CG2  | 2.20                     | 0.54              |
| 1:A:637:GLU:HG3  | 2:B:515:PHE:CA   | 2.37                     | 0.54              |
| 2:B:90:ILE:CG1   | 2:B:98:LYS:CD    | 2.85                     | 0.54              |
| 2:B:316:THR:CB   | 3:M:90:PHE:CZ    | 2.90                     | 0.54              |
| 2:B:340:ILE:HG21 | 2:B:373:LEU:O    | 2.07                     | 0.54              |
| 2:B:564:LYS:O    | 2:B:567:GLN:N    | 2.40                     | 0.54              |
| 2:B:589:SER:HA   | 2:B:618:PHE:CE2  | 2.42                     | 0.54              |

*Continued on next page...*

*Continued from previous page...*

| Atom-1           | Atom-2           | Interatomic distance (Å) | Clash overlap (Å) |
|------------------|------------------|--------------------------|-------------------|
| 3:M:52:ASP:CA    | 3:M:67:SER:C     | 2.69                     | 0.54              |
| 4:S:89:VAL:HG11  | 4:S:98:ILE:HG23  | 1.87                     | 0.54              |
| 4:S:131:VAL:HG22 | 4:S:153:VAL:CG2  | 2.26                     | 0.54              |
| 1:A:92:LEU:HD22  | 1:A:124:ALA:N    | 2.23                     | 0.54              |
| 1:A:163:ALA:HA   | 1:A:199:ASN:HD21 | 1.72                     | 0.54              |
| 1:A:185:LEU:HD22 | 1:A:189:PHE:CE1  | 2.43                     | 0.54              |
| 2:B:248:LEU:O    | 2:B:252:LEU:CG   | 2.45                     | 0.54              |
| 2:B:449:HIS:O    | 2:B:453:TRP:CG   | 2.60                     | 0.54              |
| 3:M:101:LEU:CD1  | 3:M:109:LEU:HD12 | 2.36                     | 0.54              |
| 1:A:101:GLN:O    | 4:S:167:ILE:HD11 | 2.08                     | 0.54              |
| 1:A:320:HIS:ND1  | 1:A:352:PHE:CD2  | 2.76                     | 0.54              |
| 1:A:606:PHE:O    | 1:A:609:LEU:HB3  | 2.07                     | 0.54              |
| 2:B:18:ILE:H     | 2:B:18:ILE:HD13  | 1.70                     | 0.54              |
| 2:B:28:SER:N     | 2:B:32:GLU:OE1   | 2.41                     | 0.54              |
| 2:B:155:LEU:CD1  | 2:B:156:HIS:N    | 2.70                     | 0.54              |
| 2:B:174:ALA:O    | 2:B:175:LEU:O    | 2.26                     | 0.54              |
| 2:B:247:TYR:OH   | 3:M:91:THR:HB    | 2.08                     | 0.54              |
| 2:B:415:LEU:O    | 2:B:418:TYR:N    | 2.33                     | 0.54              |
| 2:B:563:PHE:CD2  | 2:B:584:SER:C    | 2.81                     | 0.54              |
| 2:B:592:TYR:CG   | 2:B:593:ASN:N    | 2.75                     | 0.54              |
| 3:M:250:LEU:CD1  | 3:M:254:PRO:HB2  | 2.38                     | 0.54              |
| 3:M:380:ARG:NH1  | 3:M:412:ARG:HH11 | 2.05                     | 0.54              |
| 4:S:25:LEU:O     | 4:S:28:GLN:HG3   | 2.08                     | 0.54              |
| 1:A:170:LEU:HD12 | 1:A:206:LYS:CG   | 2.29                     | 0.54              |
| 1:A:178:ARG:HH11 | 1:A:209:ASP:CB   | 2.10                     | 0.54              |
| 1:A:182:ILE:HG21 | 1:A:218:ALA:N    | 2.22                     | 0.54              |
| 1:A:418:ILE:O    | 1:A:418:ILE:HG12 | 2.05                     | 0.54              |
| 1:A:505:ASN:O    | 1:A:506:LYS:C    | 2.43                     | 0.54              |
| 2:B:28:SER:N     | 2:B:32:GLU:CD    | 2.55                     | 0.54              |
| 2:B:127:LEU:CD2  | 2:B:157:THR:CG2  | 2.86                     | 0.54              |
| 2:B:362:ALA:HB1  | 2:B:366:LEU:CD1  | 2.38                     | 0.54              |
| 2:B:418:TYR:CE1  | 2:B:419:VAL:HA   | 2.41                     | 0.54              |
| 2:B:505:ASP:OD1  | 2:B:541:GLY:HA3  | 2.08                     | 0.54              |
| 3:M:218:LEU:CG   | 3:M:472:TYR:HE2  | 2.16                     | 0.54              |
| 4:S:54:PRO:CB    | 4:S:57:LEU:HD13  | 2.37                     | 0.54              |
| 1:A:129:LYS:CD   | 1:A:161:ASP:HB3  | 2.38                     | 0.54              |
| 1:A:513:ARG:CB   | 1:A:550:VAL:HG11 | 2.37                     | 0.54              |
| 2:B:41:ASN:HB3   | 2:B:43:ASN:CG    | 2.19                     | 0.54              |
| 2:B:105:LEU:O    | 2:B:106:LEU:O    | 2.26                     | 0.54              |
| 2:B:134:LEU:C    | 2:B:136:CYS:H    | 2.11                     | 0.54              |
| 2:B:143:SER:HA   | 2:B:179:LYS:CB   | 2.32                     | 0.54              |

*Continued on next page...*

*Continued from previous page...*

| Atom-1           | Atom-2           | Interatomic distance (Å) | Clash overlap (Å) |
|------------------|------------------|--------------------------|-------------------|
| 2:B:144:ASP:CA   | 2:B:179:LYS:CD   | 2.84                     | 0.54              |
| 2:B:451:MET:HG3  | 2:B:489:ILE:HG12 | 1.90                     | 0.54              |
| 2:B:483:PRO:HA   | 2:B:486:HIS:CB   | 2.38                     | 0.54              |
| 2:B:534:ILE:CD1  | 2:B:595:VAL:HG23 | 2.38                     | 0.54              |
| 2:B:562:ASN:OD1  | 2:B:580:TYR:HB2  | 2.06                     | 0.54              |
| 3:M:16:PHE:HE1   | 3:M:122:SER:HB2  | 1.71                     | 0.54              |
| 3:M:65:TYR:CD2   | 3:M:86:PRO:CB    | 2.88                     | 0.54              |
| 3:M:476:THR:OG1  | 3:M:477:GLY:N    | 2.34                     | 0.54              |
| 1:A:100:LEU:HG   | 4:S:162:SER:N    | 2.18                     | 0.54              |
| 1:A:150:LEU:CD2  | 1:A:158:LEU:HD11 | 2.37                     | 0.54              |
| 1:A:428:MET:O    | 1:A:431:VAL:HB   | 2.07                     | 0.54              |
| 1:A:495:ILE:HG23 | 1:A:515:CYS:HB3  | 1.89                     | 0.54              |
| 1:A:532:LEU:O    | 1:A:533:ILE:O    | 2.26                     | 0.54              |
| 2:B:159:LYS:CE   | 2:B:191:GLU:CD   | 2.75                     | 0.54              |
| 2:B:170:ARG:NH1  | 2:B:198:GLU:C    | 2.61                     | 0.54              |
| 2:B:178:ILE:CB   | 2:B:214:ALA:CB   | 2.84                     | 0.54              |
| 2:B:197:LYS:O    | 2:B:198:GLU:C    | 2.42                     | 0.54              |
| 2:B:451:MET:HG3  | 2:B:489:ILE:CG1  | 2.37                     | 0.54              |
| 3:M:225:VAL:HG22 | 3:M:480:GLN:CB   | 2.38                     | 0.54              |
| 3:M:265:ASN:O    | 3:M:266:ASP:C    | 2.44                     | 0.54              |
| 1:A:132:LEU:HD23 | 1:A:169:MET:SD   | 2.47                     | 0.54              |
| 1:A:255:ARG:C    | 1:A:257:LEU:H    | 2.11                     | 0.54              |
| 1:A:524:THR:HG21 | 1:A:565:ASN:ND2  | 2.22                     | 0.54              |
| 1:A:586:GLU:CA   | 1:A:604:LEU:HD12 | 2.38                     | 0.54              |
| 1:A:602:GLU:CD   | 1:A:633:PHE:HE1  | 1.97                     | 0.54              |
| 1:A:636:TYR:N    | 2:B:554:LYS:CD   | 2.63                     | 0.54              |
| 1:A:638:LEU:O    | 2:B:518:ILE:HD12 | 2.08                     | 0.54              |
| 2:B:117:LEU:CD2  | 2:B:149:SER:HG   | 2.07                     | 0.54              |
| 2:B:121:ASN:O    | 2:B:124:GLN:CB   | 2.56                     | 0.54              |
| 2:B:237:ILE:HG13 | 2:B:245:GLN:HG2  | 1.90                     | 0.54              |
| 2:B:366:LEU:O    | 2:B:367:SER:O    | 2.25                     | 0.54              |
| 2:B:397:GLN:NE2  | 2:B:431:MET:SD   | 2.81                     | 0.54              |
| 2:B:418:TYR:CZ   | 2:B:432:ALA:HB2  | 2.30                     | 0.54              |
| 2:B:455:ILE:O    | 2:B:459:GLU:N    | 2.31                     | 0.54              |
| 3:M:10:THR:CA    | 3:M:75:TRP:HE1   | 2.20                     | 0.54              |
| 3:M:101:LEU:HD11 | 3:M:108:LYS:N    | 2.23                     | 0.54              |
| 4:S:56:SER:O     | 4:S:60:SER:HB3   | 1.98                     | 0.54              |
| 1:A:102:GLN:O    | 4:S:167:ILE:CD1  | 2.56                     | 0.54              |
| 1:A:105:VAL:HG22 | 4:S:167:ILE:HG23 | 1.81                     | 0.54              |
| 1:A:143:VAL:CG1  | 1:A:169:MET:HB3  | 2.36                     | 0.54              |
| 1:A:440:ASN:CB   | 1:A:442:SER:HB3  | 2.37                     | 0.54              |

*Continued on next page...*

*Continued from previous page...*

| Atom-1           | Atom-2           | Interatomic distance (Å) | Clash overlap (Å) |
|------------------|------------------|--------------------------|-------------------|
| 1:A:609:LEU:CG   | 1:A:628:VAL:CG1  | 2.85                     | 0.54              |
| 2:B:79:VAL:C     | 2:B:108:PHE:HE1  | 2.12                     | 0.54              |
| 2:B:120:ILE:HG22 | 2:B:153:ILE:CB   | 2.38                     | 0.54              |
| 2:B:335:LYS:O    | 2:B:335:LYS:HG2  | 2.08                     | 0.54              |
| 2:B:553:ALA:HB2  | 2:B:614:ILE:CG2  | 2.38                     | 0.54              |
| 3:M:252:ASP:C    | 3:M:254:PRO:HD2  | 2.28                     | 0.54              |
| 3:M:257:ALA:CB   | 3:M:455:VAL:CG2  | 2.85                     | 0.54              |
| 3:M:271:SER:HB3  | 3:M:301:GLU:CG   | 2.37                     | 0.54              |
| 3:M:293:PRO:CA   | 3:M:294:ASP:O    | 2.55                     | 0.54              |
| 3:M:316:ARG:CG   | 3:M:322:LEU:HD13 | 2.37                     | 0.54              |
| 3:M:317:MET:HB2  | 3:M:322:LEU:HB2  | 1.89                     | 0.54              |
| 4:S:12:CYS:HB3   | 4:S:36:TYR:HB3   | 1.89                     | 0.54              |
| 4:S:14:PRO:HA    | 4:S:36:TYR:CZ    | 2.36                     | 0.54              |
| 4:S:136:VAL:O    | 4:S:140:MET:N    | 2.41                     | 0.54              |
| 1:A:64:LEU:HB3   | 1:A:102:GLN:HE21 | 1.71                     | 0.54              |
| 1:A:103:LYS:O    | 1:A:104:ARG:C    | 2.38                     | 0.54              |
| 1:A:104:ARG:CG   | 4:S:126:GLN:OE1  | 2.47                     | 0.54              |
| 1:A:288:THR:CB   | 1:A:291:ILE:HD13 | 2.37                     | 0.54              |
| 1:A:322:PHE:HB3  | 1:A:330:LEU:CD2  | 2.38                     | 0.54              |
| 2:B:18:ILE:O     | 2:B:23:ALA:HB3   | 2.07                     | 0.54              |
| 2:B:155:LEU:CB   | 2:B:188:TYR:CD2  | 2.79                     | 0.54              |
| 2:B:275:ARG:CB   | 2:B:291:TYR:HB3  | 2.13                     | 0.54              |
| 2:B:498:THR:CG2  | 2:B:532:ARG:CB   | 2.86                     | 0.54              |
| 3:M:243:ILE:HG13 | 3:M:473:LYS:O    | 2.07                     | 0.54              |
| 3:M:372:ILE:O    | 3:M:372:ILE:HG22 | 2.07                     | 0.54              |
| 1:A:254:ILE:O    | 1:A:257:LEU:HB2  | 2.09                     | 0.53              |
| 1:A:384:LEU:CD1  | 1:A:435:ILE:CG2  | 2.74                     | 0.53              |
| 1:A:384:LEU:CG   | 1:A:441:TYR:CE2  | 2.85                     | 0.53              |
| 1:A:488:ARG:HD2  | 1:A:522:PHE:CG   | 2.43                     | 0.53              |
| 2:B:124:GLN:OE1  | 2:B:153:ILE:HG23 | 2.07                     | 0.53              |
| 2:B:158:VAL:HG12 | 2:B:195:ILE:CG2  | 2.27                     | 0.53              |
| 2:B:275:ARG:HG3  | 2:B:294:VAL:CB   | 2.37                     | 0.53              |
| 2:B:302:PHE:CE2  | 2:B:328:LEU:HD11 | 2.44                     | 0.53              |
| 2:B:559:ASP:O    | 2:B:562:ASN:N    | 2.41                     | 0.53              |
| 2:B:562:ASN:ND2  | 2:B:580:TYR:CG   | 2.77                     | 0.53              |
| 3:M:215:TYR:CG   | 3:M:468:LYS:C    | 2.81                     | 0.53              |
| 3:M:272:LEU:N    | 3:M:272:LEU:HD12 | 2.23                     | 0.53              |
| 3:M:353:VAL:HG13 | 3:M:353:VAL:O    | 2.08                     | 0.53              |
| 4:S:53:THR:OG1   | 4:S:68:VAL:N     | 2.40                     | 0.53              |
| 1:A:220:SER:CB   | 4:S:141:VAL:C    | 2.75                     | 0.53              |
| 1:A:304:LEU:HD22 | 1:A:344:ILE:CG2  | 2.36                     | 0.53              |

*Continued on next page...*

*Continued from previous page...*

| Atom-1           | Atom-2           | Interatomic distance (Å) | Clash overlap (Å) |
|------------------|------------------|--------------------------|-------------------|
| 1:A:356:ILE:HD13 | 1:A:374:LEU:HB3  | 1.89                     | 0.53              |
| 1:A:356:ILE:O    | 1:A:359:LEU:N    | 2.37                     | 0.53              |
| 2:B:185:LYS:HA   | 2:B:222:HIS:NE2  | 2.23                     | 0.53              |
| 2:B:243:TRP:CH2  | 3:M:95:THR:N     | 2.76                     | 0.53              |
| 2:B:302:PHE:O    | 2:B:306:LEU:HG   | 2.08                     | 0.53              |
| 2:B:433:VAL:HG22 | 2:B:471:TYR:CE2  | 2.42                     | 0.53              |
| 2:B:505:ASP:CA   | 2:B:544:THR:OG1  | 2.55                     | 0.53              |
| 1:A:401:VAL:HG23 | 1:A:418:ILE:C    | 2.28                     | 0.53              |
| 1:A:494:ASN:O    | 1:A:498:LEU:HG   | 2.08                     | 0.53              |
| 1:A:522:PHE:C    | 1:A:524:THR:H    | 2.11                     | 0.53              |
| 1:A:601:VAL:O    | 1:A:602:GLU:C    | 2.31                     | 0.53              |
| 2:B:95:THR:OG1   | 2:B:133:GLU:OE1  | 2.24                     | 0.53              |
| 2:B:189:HIS:HB2  | 2:B:222:HIS:CE1  | 2.43                     | 0.53              |
| 2:B:237:ILE:CG2  | 2:B:305:SER:HB3  | 2.31                     | 0.53              |
| 2:B:408:VAL:CG1  | 2:B:412:PHE:CD2  | 2.91                     | 0.53              |
| 2:B:512:VAL:CB   | 2:B:551:LEU:HD12 | 2.36                     | 0.53              |
| 2:B:596:LEU:HB2  | 2:B:615:SER:OG   | 2.08                     | 0.53              |
| 3:M:215:TYR:CE2  | 3:M:469:GLY:N    | 2.67                     | 0.53              |
| 1:A:561:ASN:O    | 1:A:562:TRP:C    | 2.44                     | 0.53              |
| 2:B:209:SER:HB2  | 2:B:244:SER:OG   | 2.08                     | 0.53              |
| 2:B:352:ASN:HD22 | 2:B:352:ASN:N    | 1.99                     | 0.53              |
| 2:B:363:ILE:CG2  | 2:B:398:ILE:CG1  | 2.85                     | 0.53              |
| 3:M:67:SER:OG    | 3:M:90:PHE:HD1   | 1.31                     | 0.53              |
| 3:M:74:TYR:CD1   | 3:M:76:CYS:SG    | 3.02                     | 0.53              |
| 3:M:217:ASP:O    | 3:M:472:TYR:CD1  | 2.62                     | 0.53              |
| 3:M:220:GLU:HG2  | 3:M:439:TYR:HB2  | 1.89                     | 0.53              |
| 3:M:374:TYR:HH   | 3:M:394:GLN:C    | 2.09                     | 0.53              |
| 4:S:33:GLU:HA    | 4:S:36:TYR:HD1   | 1.73                     | 0.53              |
| 1:A:80:TYR:CD1   | 1:A:82:PHE:HE2   | 2.26                     | 0.53              |
| 1:A:182:ILE:HG23 | 1:A:203:PHE:HE2  | 1.72                     | 0.53              |
| 1:A:498:LEU:HB3  | 1:A:504:ILE:CG1  | 2.37                     | 0.53              |
| 1:A:610:SER:HG   | 1:A:625:LEU:HD13 | 1.72                     | 0.53              |
| 2:B:2:VAL:HA     | 2:B:5:ILE:HD12   | 1.90                     | 0.53              |
| 2:B:296:ASP:OD1  | 2:B:297:PRO:N    | 2.41                     | 0.53              |
| 2:B:578:PRO:CB   | 2:B:579:PRO:HD3  | 2.29                     | 0.53              |
| 2:B:586:SER:O    | 2:B:590:GLN:HG3  | 2.09                     | 0.53              |
| 3:M:5:PHE:CB     | 3:M:125:PHE:HE2  | 2.21                     | 0.53              |
| 3:M:276:VAL:HG22 | 3:M:299:LEU:HD12 | 1.90                     | 0.53              |
| 3:M:354:ASP:CB   | 3:M:440:ILE:CD1  | 2.85                     | 0.53              |
| 1:A:263:LEU:O    | 1:A:266:VAL:C    | 2.46                     | 0.53              |
| 1:A:338:PHE:HE2  | 1:A:352:PHE:CE2  | 2.27                     | 0.53              |

*Continued on next page...*

*Continued from previous page...*

| Atom-1           | Atom-2           | Interatomic distance (Å) | Clash overlap (Å) |
|------------------|------------------|--------------------------|-------------------|
| 1:A:589:SER:HB3  | 1:A:601:VAL:HG22 | 1.91                     | 0.53              |
| 2:B:182:ARG:N    | 2:B:218:CYS:HA   | 2.23                     | 0.53              |
| 2:B:350:THR:CB   | 2:B:352:ASN:ND2  | 2.61                     | 0.53              |
| 1:A:163:ALA:CB   | 1:A:199:ASN:ND2  | 2.62                     | 0.53              |
| 1:A:171:ASN:OD1  | 1:A:202:LYS:NZ   | 2.38                     | 0.53              |
| 1:A:252:ILE:CB   | 4:S:144:THR:OG1  | 2.54                     | 0.53              |
| 1:A:408:ILE:CD1  | 1:A:410:TYR:CD1  | 2.90                     | 0.53              |
| 1:A:585:PHE:CE2  | 1:A:603:VAL:HG11 | 2.44                     | 0.53              |
| 2:B:83:PHE:CE1   | 2:B:105:LEU:HA   | 2.43                     | 0.53              |
| 2:B:120:ILE:HG12 | 2:B:150:LEU:HD22 | 1.89                     | 0.53              |
| 2:B:133:GLU:CA   | 2:B:168:MET:SD   | 2.96                     | 0.53              |
| 2:B:136:CYS:CA   | 2:B:172:GLU:CB   | 2.86                     | 0.53              |
| 2:B:184:GLY:O    | 2:B:188:TYR:CD1  | 2.62                     | 0.53              |
| 2:B:523:PHE:CE1  | 2:B:580:TYR:CD2  | 2.58                     | 0.53              |
| 3:M:99:ILE:HG22  | 3:M:103:TYR:CE1  | 2.44                     | 0.53              |
| 3:M:276:VAL:HG21 | 3:M:299:LEU:HA   | 1.91                     | 0.53              |
| 3:M:306:LEU:CD2  | 3:M:317:MET:HE3  | 2.38                     | 0.53              |
| 1:A:104:ARG:CB   | 1:A:145:ILE:HG13 | 2.39                     | 0.53              |
| 1:A:104:ARG:HD3  | 1:A:145:ILE:HG13 | 1.91                     | 0.53              |
| 1:A:105:VAL:HG21 | 4:S:167:ILE:C    | 2.30                     | 0.53              |
| 1:A:245:VAL:HG13 | 1:A:246:THR:HG23 | 1.90                     | 0.53              |
| 1:A:609:LEU:CD2  | 1:A:628:VAL:CG1  | 2.85                     | 0.53              |
| 1:A:637:GLU:HB2  | 2:B:513:TRP:CD1  | 2.43                     | 0.53              |
| 2:B:108:PHE:CE2  | 2:B:115:LEU:HD23 | 2.44                     | 0.53              |
| 2:B:136:CYS:O    | 2:B:139:LEU:N    | 2.40                     | 0.53              |
| 2:B:151:ALA:N    | 2:B:152:PRO:CD   | 2.71                     | 0.53              |
| 2:B:167:ALA:O    | 2:B:207:VAL:HG21 | 2.09                     | 0.53              |
| 2:B:523:PHE:CE1  | 2:B:582:ASP:OD1  | 2.62                     | 0.53              |
| 2:B:594:ALA:O    | 2:B:598:LEU:HG   | 2.07                     | 0.53              |
| 3:M:74:TYR:CB    | 3:M:114:ILE:HD11 | 2.37                     | 0.53              |
| 3:M:258:VAL:HG13 | 3:M:449:VAL:CG1  | 2.39                     | 0.53              |
| 3:M:293:PRO:CB   | 3:M:294:ASP:O    | 2.55                     | 0.53              |
| 4:S:45:ASP:C     | 4:S:47:GLN:H     | 2.12                     | 0.53              |
| 1:A:88:ASN:CG    | 1:A:120:ILE:HG21 | 2.29                     | 0.53              |
| 1:A:204:VAL:HG13 | 1:A:239:LEU:CD1  | 2.39                     | 0.53              |
| 1:A:435:ILE:HG23 | 1:A:441:TYR:CE2  | 2.44                     | 0.53              |
| 1:A:481:MET:CE   | 1:A:518:CYS:HB3  | 2.36                     | 0.53              |
| 2:B:38:TYR:CD1   | 2:B:38:TYR:N     | 2.76                     | 0.53              |
| 2:B:189:HIS:HB2  | 2:B:222:HIS:CD2  | 2.43                     | 0.53              |
| 2:B:189:HIS:CG   | 2:B:222:HIS:CG   | 2.96                     | 0.53              |
| 2:B:277:CYS:HB2  | 2:B:295:ASN:C    | 2.28                     | 0.53              |

*Continued on next page...*

*Continued from previous page...*

| Atom-1           | Atom-2           | Interatomic distance (Å) | Clash overlap (Å) |
|------------------|------------------|--------------------------|-------------------|
| 2:B:292:GLU:OE2  | 2:B:296:ASP:CG   | 2.46                     | 0.53              |
| 2:B:464:SER:OG   | 2:B:467:VAL:HG23 | 2.08                     | 0.53              |
| 3:M:7:ILE:CG2    | 3:M:74:TYR:HB2   | 2.39                     | 0.53              |
| 3:M:220:GLU:HA   | 3:M:474:THR:HG21 | 1.91                     | 0.53              |
| 3:M:263:MET:HG2  | 3:M:263:MET:O    | 2.09                     | 0.53              |
| 1:A:101:GLN:HG3  | 4:S:167:ILE:HG21 | 1.80                     | 0.53              |
| 1:A:125:THR:HG21 | 1:A:158:LEU:HA   | 1.90                     | 0.53              |
| 1:A:463:ASP:CA   | 2:B:1:MET:SD     | 2.96                     | 0.53              |
| 1:A:581:LEU:CG   | 1:A:607:LEU:HD11 | 2.38                     | 0.53              |
| 2:B:80:GLN:HG2   | 2:B:115:LEU:HD21 | 1.90                     | 0.53              |
| 2:B:306:LEU:CB   | 2:B:325:LEU:HD21 | 2.38                     | 0.53              |
| 2:B:560:ILE:N    | 2:B:563:PHE:HB2  | 2.24                     | 0.53              |
| 3:M:215:TYR:HB2  | 3:M:467:TYR:CG   | 2.42                     | 0.53              |
| 3:M:242:GLY:N    | 3:M:444:ALA:HB2  | 2.23                     | 0.53              |
| 4:S:1:MET:N      | 4:S:93:GLU:OE1   | 2.41                     | 0.53              |
| 4:S:16:LEU:HD11  | 4:S:129:GLU:HG2  | 1.91                     | 0.53              |
| 4:S:39:ILE:HD12  | 4:S:48:SER:HA    | 1.90                     | 0.53              |
| 1:A:366:SER:O    | 1:A:370:LYS:CG   | 2.49                     | 0.52              |
| 1:A:512:LEU:HD13 | 1:A:543:TYR:CE1  | 2.44                     | 0.52              |
| 2:B:65:ARG:O     | 2:B:68:SER:N     | 2.34                     | 0.52              |
| 2:B:87:VAL:HG22  | 2:B:119:SER:HA   | 1.89                     | 0.52              |
| 2:B:100:LEU:O    | 2:B:103:LEU:HB2  | 2.10                     | 0.52              |
| 2:B:132:SER:CA   | 2:B:169:VAL:HG23 | 2.38                     | 0.52              |
| 2:B:155:LEU:HD21 | 2:B:192:LEU:H    | 1.75                     | 0.52              |
| 2:B:196:LEU:HB3  | 2:B:215:TYR:HE2  | 1.62                     | 0.52              |
| 2:B:400:SER:HA   | 2:B:439:CYS:SG   | 2.48                     | 0.52              |
| 2:B:493:LEU:HD11 | 2:B:511:ILE:HG12 | 1.90                     | 0.52              |
| 3:M:372:ILE:HD12 | 3:M:428:VAL:HG22 | 1.89                     | 0.52              |
| 3:M:437:TYR:CE1  | 3:M:479:PHE:CD1  | 2.97                     | 0.52              |
| 4:S:6:LEU:HD22   | 4:S:32:LEU:CD2   | 2.29                     | 0.52              |
| 4:S:34:GLN:HB3   | 4:S:58:LEU:HD11  | 1.89                     | 0.52              |
| 1:A:103:LYS:CB   | 1:A:107:TYR:CE1  | 2.87                     | 0.52              |
| 1:A:557:LYS:HD3  | 2:B:605:PHE:CD2  | 2.44                     | 0.52              |
| 1:A:588:LEU:O    | 1:A:589:SER:C    | 2.42                     | 0.52              |
| 2:B:42:ILE:HG22  | 2:B:43:ASN:N     | 2.24                     | 0.52              |
| 2:B:157:THR:HG22 | 2:B:158:VAL:N    | 2.24                     | 0.52              |
| 4:S:76:ILE:O     | 4:S:86:THR:HA    | 2.09                     | 0.52              |
| 1:A:140:VAL:HG13 | 1:A:176:TYR:HB3  | 1.86                     | 0.52              |
| 1:A:204:VAL:HG23 | 1:A:236:LEU:HD21 | 1.80                     | 0.52              |
| 1:A:309:PHE:CE1  | 1:A:348:PHE:CE2  | 2.97                     | 0.52              |
| 1:A:400:VAL:HA   | 1:A:403:LEU:HD12 | 1.90                     | 0.52              |

*Continued on next page...*

*Continued from previous page...*

| Atom-1           | Atom-2           | Interatomic distance (Å) | Clash overlap (Å) |
|------------------|------------------|--------------------------|-------------------|
| 1:A:420:ILE:C    | 1:A:421:PRO:O    | 2.48                     | 0.52              |
| 1:A:536:MET:O    | 1:A:537:THR:O    | 2.24                     | 0.52              |
| 1:A:600:SER:C    | 1:A:602:GLU:H    | 2.11                     | 0.52              |
| 2:B:36:THR:O     | 2:B:40:GLN:HG3   | 2.08                     | 0.52              |
| 2:B:36:THR:CA    | 2:B:39:SER:OG    | 2.57                     | 0.52              |
| 2:B:136:CYS:HB3  | 2:B:172:GLU:CG   | 2.39                     | 0.52              |
| 2:B:181:TYR:C    | 2:B:218:CYS:HA   | 2.30                     | 0.52              |
| 2:B:352:ASN:ND2  | 2:B:352:ASN:O    | 2.43                     | 0.52              |
| 2:B:461:HIS:CB   | 2:B:463:LEU:HD23 | 2.39                     | 0.52              |
| 2:B:519:ALA:CB   | 2:B:555:LEU:CD1  | 2.88                     | 0.52              |
| 2:B:546:CYS:O    | 2:B:549:LEU:HB3  | 2.09                     | 0.52              |
| 3:M:267:ILE:CD1  | 3:M:445:SER:O    | 2.57                     | 0.52              |
| 4:S:9:ASN:OD1    | 4:S:13:GLN:CB    | 2.57                     | 0.52              |
| 1:A:104:ARG:CB   | 1:A:145:ILE:HG21 | 2.37                     | 0.52              |
| 1:A:244:LEU:HD11 | 1:A:281:LEU:HD13 | 1.88                     | 0.52              |
| 1:A:401:VAL:HG23 | 1:A:418:ILE:N    | 2.24                     | 0.52              |
| 2:B:123:LEU:HD23 | 2:B:138:ALA:HB1  | 1.91                     | 0.52              |
| 2:B:132:SER:HB2  | 2:B:169:VAL:CG2  | 2.38                     | 0.52              |
| 2:B:143:SER:HB2  | 2:B:179:LYS:HB2  | 1.91                     | 0.52              |
| 2:B:170:ARG:CG   | 2:B:199:LEU:HD23 | 2.34                     | 0.52              |
| 2:B:184:GLY:O    | 2:B:188:TYR:HD1  | 1.92                     | 0.52              |
| 2:B:197:LYS:O    | 2:B:199:LEU:CA   | 2.56                     | 0.52              |
| 2:B:256:CYS:O    | 2:B:260:LEU:HG   | 2.10                     | 0.52              |
| 2:B:513:TRP:HA   | 2:B:551:LEU:HD13 | 1.60                     | 0.52              |
| 2:B:542:PRO:HA   | 2:B:602:ASP:OD1  | 2.08                     | 0.52              |
| 3:M:104:PHE:HD2  | 3:M:105:ASP:OD2  | 1.93                     | 0.52              |
| 1:A:117:ASP:O    | 1:A:120:ILE:HB   | 2.09                     | 0.52              |
| 1:A:251:TRP:CG   | 4:S:104:THR:OG1  | 2.53                     | 0.52              |
| 1:A:581:LEU:HD23 | 1:A:607:LEU:HD13 | 1.92                     | 0.52              |
| 1:A:589:SER:O    | 1:A:597:GLN:CG   | 2.45                     | 0.52              |
| 2:B:94:ASP:O     | 2:B:134:LEU:CD2  | 2.57                     | 0.52              |
| 2:B:98:LYS:HG3   | 2:B:102:HIS:CE1  | 2.44                     | 0.52              |
| 2:B:175:LEU:CD2  | 2:B:210:CYS:CB   | 2.87                     | 0.52              |
| 2:B:219:TYR:HD1  | 2:B:226:LEU:HD13 | 1.54                     | 0.52              |
| 2:B:275:ARG:NE   | 2:B:275:ARG:CA   | 2.73                     | 0.52              |
| 2:B:404:ASN:O    | 2:B:405:GLU:O    | 2.24                     | 0.52              |
| 2:B:542:PRO:CB   | 2:B:602:ASP:OD1  | 2.58                     | 0.52              |
| 2:B:566:ALA:CB   | 2:B:581:TYR:HA   | 2.39                     | 0.52              |
| 3:M:7:ILE:O      | 3:M:15:ILE:N     | 2.41                     | 0.52              |
| 3:M:53:HIS:CB    | 3:M:65:TYR:CE1   | 2.93                     | 0.52              |
| 1:A:100:LEU:H    | 4:S:162:SER:HB2  | 0.43                     | 0.52              |

*Continued on next page...*



*Continued from previous page...*

| Atom-1           | Atom-2           | Interatomic distance (Å) | Clash overlap (Å) |
|------------------|------------------|--------------------------|-------------------|
| 1:A:212:ILE:CG1  | 4:S:145:ASN:HD22 | 2.21                     | 0.52              |
| 1:A:431:VAL:O    | 1:A:434:SER:HB2  | 2.09                     | 0.52              |
| 1:A:463:ASP:HA   | 2:B:1:MET:SD     | 2.49                     | 0.52              |
| 1:A:528:ASN:O    | 1:A:529:GLY:O    | 2.27                     | 0.52              |
| 1:A:554:ALA:O    | 1:A:557:LYS:HB2  | 2.10                     | 0.52              |
| 2:B:21:GLU:HA    | 2:B:24:ALA:HB3   | 1.39                     | 0.52              |
| 2:B:62:ALA:CB    | 2:B:66:ILE:HD11  | 2.37                     | 0.52              |
| 2:B:92:THR:O     | 2:B:134:LEU:CD1  | 2.58                     | 0.52              |
| 2:B:476:ARG:O    | 2:B:480:GLN:HG3  | 2.10                     | 0.52              |
| 2:B:584:SER:O    | 2:B:585:GLY:O    | 2.27                     | 0.52              |
| 3:M:7:ILE:CG1    | 3:M:76:CYS:SG    | 2.91                     | 0.52              |
| 3:M:80:THR:O     | 3:M:81:SER:HB3   | 2.10                     | 0.52              |
| 3:M:455:VAL:HG12 | 3:M:455:VAL:O    | 2.09                     | 0.52              |
| 4:S:10:LYS:HD3   | 4:S:82:THR:HB    | 1.92                     | 0.52              |
| 4:S:126:GLN:NE2  | 4:S:127:THR:OG1  | 2.42                     | 0.52              |
| 1:A:348:PHE:HB3  | 1:A:352:PHE:HE1  | 1.74                     | 0.52              |
| 1:A:426:ILE:HD13 | 1:A:466:ASP:OD2  | 2.09                     | 0.52              |
| 1:A:630:PRO:O    | 2:B:554:LYS:CB   | 2.56                     | 0.52              |
| 2:B:63:MET:CG    | 2:B:100:LEU:HB2  | 2.39                     | 0.52              |
| 2:B:189:HIS:CD2  | 2:B:189:HIS:O    | 2.63                     | 0.52              |
| 2:B:234:CYS:CB   | 2:B:301:LEU:HB3  | 2.40                     | 0.52              |
| 2:B:243:TRP:HZ2  | 3:M:95:THR:N     | 1.90                     | 0.52              |
| 2:B:295:ASN:O    | 2:B:296:ASP:CB   | 2.57                     | 0.52              |
| 2:B:368:ILE:HD11 | 2:B:401:THR:HG22 | 1.91                     | 0.52              |
| 2:B:596:LEU:O    | 2:B:599:ALA:N    | 2.42                     | 0.52              |
| 3:M:5:PHE:CB     | 3:M:125:PHE:CE2  | 2.93                     | 0.52              |
| 3:M:74:TYR:CD2   | 3:M:109:LEU:O    | 2.63                     | 0.52              |
| 3:M:104:PHE:HZ   | 3:M:113:LYS:NZ   | 0.39                     | 0.52              |
| 3:M:347:PHE:HE2  | 3:M:352:GLN:CA   | 2.22                     | 0.52              |
| 4:S:4:ALA:CB     | 4:S:18:LYS:O     | 2.58                     | 0.52              |
| 1:A:249:ASN:ND2  | 4:S:146:VAL:H    | 2.08                     | 0.52              |
| 1:A:301:GLY:O    | 1:A:302:ASN:HB3  | 2.09                     | 0.52              |
| 1:A:585:PHE:CD2  | 1:A:607:LEU:HD11 | 2.44                     | 0.52              |
| 2:B:4:SER:O      | 2:B:8:ILE:HG13   | 2.09                     | 0.52              |
| 2:B:123:LEU:CB   | 2:B:142:LEU:CD1  | 2.84                     | 0.52              |
| 2:B:174:ALA:C    | 2:B:214:ALA:CB   | 2.77                     | 0.52              |
| 2:B:189:HIS:CG   | 2:B:189:HIS:O    | 2.62                     | 0.52              |
| 2:B:196:LEU:HB2  | 2:B:229:HIS:HE1  | 1.61                     | 0.52              |
| 2:B:208:ILE:HD11 | 2:B:236:ILE:HG23 | 1.83                     | 0.52              |
| 2:B:223:LEU:CD1  | 2:B:258:GLN:O    | 2.58                     | 0.52              |
| 2:B:501:THR:HA   | 2:B:508:ARG:NH2  | 2.20                     | 0.52              |

*Continued on next page...*

*Continued from previous page...*

| Atom-1           | Atom-2           | Interatomic distance (Å) | Clash overlap (Å) |
|------------------|------------------|--------------------------|-------------------|
| 2:B:537:PHE:CZ   | 2:B:598:LEU:O    | 2.62                     | 0.52              |
| 3:M:82:LYS:O     | 3:M:83:SER:C     | 2.48                     | 0.52              |
| 3:M:270:PRO:HA   | 3:M:302:TYR:HD1  | 1.74                     | 0.52              |
| 4:S:50:PHE:HA    | 4:S:76:ILE:HA    | 1.91                     | 0.52              |
| 1:A:92:LEU:CD1   | 1:A:123:LEU:HD12 | 2.32                     | 0.52              |
| 1:A:260:PHE:O    | 1:A:262:ASN:N    | 2.40                     | 0.52              |
| 1:A:566:PHE:CZ   | 1:A:618:THR:O    | 2.63                     | 0.52              |
| 1:A:637:GLU:CB   | 2:B:516:GLY:H    | 2.05                     | 0.52              |
| 2:B:98:LYS:HG3   | 2:B:137:PHE:HB2  | 1.91                     | 0.52              |
| 2:B:140:SER:HA   | 2:B:172:GLU:OE1  | 2.05                     | 0.52              |
| 2:B:227:HIS:CE1  | 2:B:292:GLU:OE2  | 2.45                     | 0.52              |
| 2:B:451:MET:HG3  | 2:B:489:ILE:HD13 | 1.88                     | 0.52              |
| 2:B:500:GLN:HB2  | 2:B:503:LEU:HG   | 1.89                     | 0.52              |
| 2:B:559:ASP:OD2  | 2:B:582:ASP:OD2  | 2.28                     | 0.52              |
| 3:M:10:THR:CG2   | 3:M:11:LYS:N     | 2.73                     | 0.52              |
| 3:M:44:ASP:C     | 3:M:46:SER:H     | 2.13                     | 0.52              |
| 3:M:102:GLU:HA   | 3:M:106:LYS:HB2  | 1.91                     | 0.52              |
| 3:M:443:SER:HB3  | 3:M:447:ILE:H    | 1.74                     | 0.52              |
| 1:A:100:LEU:HB3  | 1:A:142:LYS:HG3  | 1.91                     | 0.52              |
| 1:A:384:LEU:CD2  | 1:A:441:TYR:CD2  | 2.86                     | 0.52              |
| 1:A:441:TYR:HD1  | 1:A:441:TYR:H    | 1.58                     | 0.52              |
| 1:A:516:ILE:CD1  | 1:A:551:LEU:CD1  | 2.86                     | 0.52              |
| 2:B:36:THR:O     | 2:B:40:GLN:N     | 2.43                     | 0.52              |
| 2:B:139:LEU:CD2  | 2:B:172:GLU:O    | 2.55                     | 0.52              |
| 2:B:216:LYS:HB2  | 2:B:251:LEU:CD2  | 2.40                     | 0.52              |
| 2:B:307:ASN:CG   | 2:B:339:PHE:CE2  | 2.82                     | 0.52              |
| 2:B:550:VAL:HA   | 2:B:614:ILE:HD11 | 1.91                     | 0.52              |
| 3:M:222:PHE:CA   | 3:M:479:PHE:HZ   | 2.17                     | 0.52              |
| 3:M:258:VAL:HG22 | 3:M:452:ILE:HG23 | 1.90                     | 0.52              |
| 3:M:280:ASP:OD1  | 3:M:281:GLY:N    | 2.43                     | 0.52              |
| 3:M:317:MET:O    | 3:M:322:LEU:HB3  | 2.10                     | 0.52              |
| 3:M:368:ASP:O    | 3:M:371:GLU:HB2  | 2.10                     | 0.52              |
| 4:S:83:LEU:HD11  | 4:S:116:VAL:CB   | 2.39                     | 0.52              |
| 1:A:67:LYS:CB    | 4:S:166:LYS:CA   | 2.87                     | 0.51              |
| 1:A:91:ILE:O     | 1:A:94:VAL:HB    | 2.10                     | 0.51              |
| 1:A:102:GLN:CB   | 4:S:166:LYS:CB   | 2.56                     | 0.51              |
| 1:A:320:HIS:CA   | 1:A:338:PHE:HZ   | 2.22                     | 0.51              |
| 1:A:566:PHE:HZ   | 1:A:618:THR:CA   | 2.22                     | 0.51              |
| 1:A:624:LEU:CA   | 2:B:617:LEU:HD21 | 2.40                     | 0.51              |
| 2:B:70:MET:CE    | 2:B:107:ARG:HG3  | 2.23                     | 0.51              |
| 2:B:196:LEU:HB2  | 2:B:229:HIS:HD1  | 1.73                     | 0.51              |

*Continued on next page...*

*Continued from previous page...*

| Atom-1           | Atom-2           | Interatomic distance (Å) | Clash overlap (Å) |
|------------------|------------------|--------------------------|-------------------|
| 2:B:344:VAL:CG1  | 2:B:381:PHE:CE1  | 2.93                     | 0.51              |
| 2:B:403:ILE:CG2  | 2:B:411:ILE:HD12 | 2.39                     | 0.51              |
| 2:B:537:PHE:C    | 2:B:539:ASN:N    | 2.62                     | 0.51              |
| 3:M:100:LEU:C    | 3:M:109:LEU:HD21 | 2.30                     | 0.51              |
| 3:M:379:LEU:N    | 3:M:379:LEU:CD1  | 2.73                     | 0.51              |
| 4:S:57:LEU:CD1   | 4:S:57:LEU:N     | 2.73                     | 0.51              |
| 1:A:140:VAL:CG2  | 1:A:177:ILE:CD1  | 2.88                     | 0.51              |
| 1:A:187:LYS:O    | 1:A:190:LEU:HB3  | 2.09                     | 0.51              |
| 1:A:190:LEU:HD12 | 1:A:228:LYS:HE3  | 1.91                     | 0.51              |
| 1:A:224:GLU:HG2  | 4:S:138:GLY:HA2  | 1.88                     | 0.51              |
| 1:A:298:ILE:HG13 | 1:A:311:THR:HG22 | 1.91                     | 0.51              |
| 1:A:403:LEU:CD1  | 1:A:421:PRO:O    | 2.55                     | 0.51              |
| 1:A:425:LYS:HB3  | 1:A:464:ILE:HD12 | 1.93                     | 0.51              |
| 1:A:626:SER:O    | 2:B:614:ILE:HA   | 2.10                     | 0.51              |
| 2:B:60:ARG:CD    | 2:B:96:LYS:CG    | 2.87                     | 0.51              |
| 2:B:123:LEU:C    | 2:B:127:LEU:HD12 | 2.30                     | 0.51              |
| 2:B:165:PRO:C    | 2:B:170:ARG:HE   | 2.12                     | 0.51              |
| 2:B:173:VAL:CB   | 2:B:199:LEU:HD11 | 2.40                     | 0.51              |
| 3:M:343:ASN:CB   | 3:M:408:VAL:HG13 | 2.40                     | 0.51              |
| 4:S:47:GLN:OE1   | 4:S:84:TYR:CD2   | 2.63                     | 0.51              |
| 1:A:71:VAL:HG12  | 1:A:105:VAL:CG1  | 2.31                     | 0.51              |
| 1:A:185:LEU:HB3  | 1:A:189:PHE:CZ   | 2.46                     | 0.51              |
| 2:B:47:LEU:HD23  | 2:B:62:ALA:O     | 2.11                     | 0.51              |
| 2:B:81:LEU:C     | 2:B:83:PHE:H     | 2.13                     | 0.51              |
| 2:B:108:PHE:CE1  | 2:B:115:LEU:HG   | 2.31                     | 0.51              |
| 2:B:112:ASP:C    | 2:B:112:ASP:OD1  | 2.49                     | 0.51              |
| 2:B:123:LEU:HB3  | 2:B:142:LEU:CD1  | 2.39                     | 0.51              |
| 2:B:208:ILE:O    | 2:B:209:SER:C    | 2.48                     | 0.51              |
| 2:B:246:SER:O    | 2:B:249:ILE:HB   | 2.09                     | 0.51              |
| 2:B:393:ILE:HG21 | 2:B:431:MET:CE   | 2.41                     | 0.51              |
| 3:M:6:TYR:HB3    | 3:M:14:LEU:HG    | 1.92                     | 0.51              |
| 3:M:18:TYR:HE2   | 3:M:20:LEU:HD21  | 1.73                     | 0.51              |
| 3:M:379:LEU:CD2  | 3:M:386:PHE:HD1  | 1.99                     | 0.51              |
| 1:A:261:THR:O    | 1:A:264:SER:OG   | 2.17                     | 0.51              |
| 1:A:624:LEU:O    | 1:A:627:GLU:HB2  | 2.11                     | 0.51              |
| 2:B:24:ALA:CB    | 2:B:35:TYR:CG    | 2.92                     | 0.51              |
| 2:B:132:SER:CB   | 2:B:166:SER:HB3  | 2.39                     | 0.51              |
| 2:B:135:ARG:NH2  | 2:B:164:ASP:HB2  | 2.24                     | 0.51              |
| 2:B:162:VAL:CG1  | 2:B:195:ILE:HA   | 2.37                     | 0.51              |
| 2:B:313:SER:OG   | 3:M:301:GLU:OE2  | 2.20                     | 0.51              |
| 2:B:344:VAL:CG1  | 2:B:381:PHE:HZ   | 2.12                     | 0.51              |

*Continued on next page...*

*Continued from previous page...*

| Atom-1           | Atom-2           | Interatomic distance (Å) | Clash overlap (Å) |
|------------------|------------------|--------------------------|-------------------|
| 2:B:553:ALA:HB2  | 2:B:614:ILE:HG21 | 1.91                     | 0.51              |
| 4:S:87:PHE:HB2   | 4:S:102:ILE:HD11 | 1.92                     | 0.51              |
| 1:A:144:GLY:CA   | 1:A:180:LYS:CB   | 2.82                     | 0.51              |
| 1:A:418:ILE:O    | 1:A:419:ILE:HB   | 2.09                     | 0.51              |
| 1:A:557:LYS:CG   | 2:B:605:PHE:CD2  | 2.81                     | 0.51              |
| 1:A:579:LYS:O    | 1:A:582:ILE:HB   | 2.09                     | 0.51              |
| 1:A:633:PHE:CD1  | 2:B:513:TRP:HZ3  | 2.16                     | 0.51              |
| 1:A:638:LEU:HD11 | 2:B:518:ILE:HG23 | 1.88                     | 0.51              |
| 2:B:15:ALA:O     | 2:B:17:VAL:HA    | 2.10                     | 0.51              |
| 2:B:189:HIS:HB2  | 2:B:222:HIS:NE2  | 2.26                     | 0.51              |
| 2:B:341:GLU:HG2  | 2:B:345:ARG:NE   | 2.22                     | 0.51              |
| 2:B:360:LEU:CD1  | 2:B:391:ALA:CB   | 2.87                     | 0.51              |
| 2:B:501:THR:CA   | 2:B:508:ARG:HH22 | 2.19                     | 0.51              |
| 3:M:72:LEU:CD1   | 3:M:101:LEU:HD22 | 2.41                     | 0.51              |
| 3:M:101:LEU:CD1  | 3:M:106:LYS:O    | 2.50                     | 0.51              |
| 3:M:380:ARG:NH1  | 3:M:410:VAL:HG11 | 2.07                     | 0.51              |
| 3:M:443:SER:HG   | 3:M:447:ILE:HG13 | 1.75                     | 0.51              |
| 4:S:6:LEU:HD12   | 4:S:16:LEU:O     | 2.10                     | 0.51              |
| 1:A:129:LYS:HD2  | 1:A:161:ASP:OD2  | 2.09                     | 0.51              |
| 1:A:141:VAL:N    | 4:S:155:GLU:HB3  | 2.24                     | 0.51              |
| 1:A:158:LEU:HG   | 1:A:162:ILE:CD1  | 2.40                     | 0.51              |
| 1:A:399:ASP:C    | 1:A:420:ILE:HB   | 2.26                     | 0.51              |
| 1:A:412:LYS:O    | 1:A:414:LYS:N    | 2.44                     | 0.51              |
| 1:A:425:LYS:HD2  | 1:A:428:MET:HE3  | 1.92                     | 0.51              |
| 1:A:563:CYS:CA   | 1:A:566:PHE:CD2  | 2.86                     | 0.51              |
| 1:A:566:PHE:C    | 1:A:568:GLU:N    | 2.59                     | 0.51              |
| 2:B:144:ASP:N    | 2:B:179:LYS:CD   | 2.71                     | 0.51              |
| 2:B:216:LYS:CD   | 2:B:251:LEU:HA   | 2.41                     | 0.51              |
| 2:B:227:HIS:CG   | 2:B:292:GLU:CD   | 2.84                     | 0.51              |
| 2:B:408:VAL:HG12 | 2:B:412:PHE:CD2  | 2.45                     | 0.51              |
| 2:B:522:GLU:O    | 2:B:522:GLU:CG   | 2.40                     | 0.51              |
| 3:M:2:TYR:CZ     | 3:M:62:VAL:HG13  | 2.46                     | 0.51              |
| 3:M:60:LEU:HD23  | 3:M:61:GLU:H     | 1.68                     | 0.51              |
| 3:M:64:LYS:HG2   | 3:M:79:SER:O     | 2.10                     | 0.51              |
| 3:M:235:LEU:CD2  | 3:M:307:SER:HA   | 2.41                     | 0.51              |
| 3:M:478:ASN:O    | 3:M:479:PHE:O    | 2.29                     | 0.51              |
| 4:S:87:PHE:CD2   | 4:S:102:ILE:HG12 | 2.45                     | 0.51              |
| 1:A:105:VAL:HB   | 4:S:167:ILE:HA   | 1.93                     | 0.51              |
| 1:A:195:ALA:O    | 1:A:199:ASN:ND2  | 2.44                     | 0.51              |
| 1:A:295:VAL:CG1  | 1:A:319:LEU:HD11 | 2.28                     | 0.51              |
| 1:A:450:TYR:CZ   | 1:A:476:GLN:HG3  | 2.39                     | 0.51              |

*Continued on next page...*

*Continued from previous page...*

| Atom-1           | Atom-2           | Interatomic distance (Å) | Clash overlap (Å) |
|------------------|------------------|--------------------------|-------------------|
| 1:A:522:PHE:C    | 1:A:524:THR:N    | 2.60                     | 0.51              |
| 1:A:530:ASN:HD21 | 1:A:573:GLU:HB3  | 1.75                     | 0.51              |
| 1:A:545:HIS:O    | 1:A:546:SER:O    | 2.28                     | 0.51              |
| 2:B:189:HIS:CG   | 2:B:222:HIS:ND1  | 2.79                     | 0.51              |
| 2:B:252:LEU:CG   | 2:B:302:PHE:CD1  | 2.88                     | 0.51              |
| 2:B:530:LEU:HD23 | 2:B:591:MET:HB3  | 1.86                     | 0.51              |
| 3:M:10:THR:N     | 3:M:75:TRP:CD1   | 2.76                     | 0.51              |
| 3:M:101:LEU:CA   | 3:M:106:LYS:HA   | 2.40                     | 0.51              |
| 3:M:218:LEU:CG   | 3:M:472:TYR:CE2  | 2.94                     | 0.51              |
| 1:A:176:TYR:CG   | 4:S:155:GLU:CG   | 2.91                     | 0.51              |
| 1:A:253:ILE:CD1  | 1:A:281:LEU:CB   | 2.79                     | 0.51              |
| 1:A:537:THR:OG1  | 1:A:584:PHE:CE1  | 2.63                     | 0.51              |
| 2:B:278:PRO:C    | 2:B:292:GLU:OE1  | 2.29                     | 0.51              |
| 2:B:374:PHE:HA   | 2:B:377:TYR:HD1  | 1.75                     | 0.51              |
| 2:B:454:LEU:O    | 2:B:457:HIS:HB2  | 2.09                     | 0.51              |
| 2:B:463:LEU:O    | 2:B:468:LEU:CD1  | 2.58                     | 0.51              |
| 3:M:3:LEU:N      | 3:M:3:LEU:CD1    | 2.73                     | 0.51              |
| 3:M:220:GLU:CD   | 3:M:222:PHE:CE1  | 2.85                     | 0.51              |
| 3:M:342:LEU:HD12 | 3:M:342:LEU:N    | 2.25                     | 0.51              |
| 1:A:129:LYS:O    | 1:A:132:LEU:N    | 2.44                     | 0.51              |
| 1:A:638:LEU:HD21 | 2:B:523:PHE:HB3  | 1.93                     | 0.51              |
| 2:B:59:VAL:HG11  | 2:B:89:ASN:HB3   | 1.91                     | 0.51              |
| 2:B:275:ARG:HB3  | 2:B:291:TYR:CG   | 2.45                     | 0.51              |
| 2:B:560:ILE:CA   | 2:B:563:PHE:HB2  | 2.41                     | 0.51              |
| 2:B:574:ASN:C    | 2:B:576:GLN:N    | 2.57                     | 0.51              |
| 3:M:220:GLU:CG   | 3:M:439:TYR:HD1  | 2.15                     | 0.51              |
| 3:M:224:VAL:C    | 3:M:480:GLN:H    | 2.07                     | 0.51              |
| 3:M:340:LEU:HG   | 3:M:342:LEU:HD11 | 1.91                     | 0.51              |
| 1:A:65:ASN:O     | 4:S:165:SER:CA   | 2.57                     | 0.51              |
| 1:A:101:GLN:CD   | 4:S:167:ILE:CG2  | 2.77                     | 0.51              |
| 1:A:582:ILE:CD1  | 1:A:608:ARG:CA   | 2.88                     | 0.51              |
| 2:B:38:TYR:HA    | 2:B:42:ILE:CA    | 2.41                     | 0.51              |
| 2:B:82:TYR:HB2   | 2:B:104:TYR:OH   | 2.10                     | 0.51              |
| 2:B:196:LEU:HB3  | 2:B:229:HIS:HD1  | 1.75                     | 0.51              |
| 2:B:294:VAL:HG13 | 2:B:295:ASN:N    | 2.26                     | 0.51              |
| 2:B:336:ASN:CB   | 2:B:339:PHE:CE1  | 2.94                     | 0.51              |
| 3:M:101:LEU:HD23 | 3:M:106:LYS:CG   | 2.35                     | 0.51              |
| 3:M:245:ASP:O    | 3:M:246:VAL:CG2  | 2.59                     | 0.51              |
| 3:M:350:VAL:HG22 | 3:M:442:GLN:OE1  | 2.11                     | 0.51              |
| 4:S:10:LYS:HA    | 4:S:84:TYR:HE1   | 1.76                     | 0.51              |
| 4:S:55:PRO:C     | 4:S:57:LEU:N     | 2.59                     | 0.51              |

*Continued on next page...*

*Continued from previous page...*

| Atom-1           | Atom-2           | Interatomic distance (Å) | Clash overlap (Å) |
|------------------|------------------|--------------------------|-------------------|
| 1:A:166:LEU:CB   | 1:A:185:LEU:HD21 | 2.42                     | 0.50              |
| 1:A:219:VAL:C    | 1:A:259:LEU:HD13 | 2.23                     | 0.50              |
| 1:A:300:LYS:C    | 1:A:302:ASN:N    | 2.57                     | 0.50              |
| 1:A:438:ALA:O    | 1:A:441:TYR:CE1  | 2.64                     | 0.50              |
| 1:A:606:PHE:CD2  | 1:A:629:LEU:CD1  | 2.78                     | 0.50              |
| 2:B:63:MET:HG2   | 2:B:100:LEU:HB2  | 1.93                     | 0.50              |
| 2:B:63:MET:CA    | 2:B:66:ILE:HD12  | 2.41                     | 0.50              |
| 2:B:185:LYS:CG   | 2:B:222:HIS:NE2  | 2.66                     | 0.50              |
| 2:B:219:TYR:HE1  | 2:B:226:LEU:HD13 | 1.12                     | 0.50              |
| 2:B:389:ILE:O    | 2:B:393:ILE:HG13 | 2.10                     | 0.50              |
| 3:M:258:VAL:CG2  | 3:M:452:ILE:CG2  | 2.86                     | 0.50              |
| 3:M:348:LYS:CG   | 3:M:405:THR:CG2  | 2.85                     | 0.50              |
| 3:M:376:ILE:HD13 | 3:M:415:ILE:HG23 | 1.93                     | 0.50              |
| 1:A:83:ASP:CG    | 1:A:85:ALA:H     | 2.14                     | 0.50              |
| 1:A:107:TYR:OH   | 1:A:128:LEU:HD23 | 2.11                     | 0.50              |
| 1:A:137:ASN:HA   | 1:A:139:ASP:HB3  | 1.93                     | 0.50              |
| 1:A:237:SER:N    | 1:A:238:PRO:CD   | 2.73                     | 0.50              |
| 1:A:309:PHE:CZ   | 1:A:348:PHE:CZ   | 2.99                     | 0.50              |
| 1:A:461:CYS:SG   | 1:A:469:LEU:CD2  | 2.95                     | 0.50              |
| 2:B:29:LYS:CD    | 2:B:30:LEU:N     | 2.58                     | 0.50              |
| 2:B:108:PHE:CD2  | 2:B:115:LEU:HB3  | 2.46                     | 0.50              |
| 2:B:155:LEU:HD13 | 2:B:155:LEU:C    | 2.31                     | 0.50              |
| 2:B:159:LYS:HA   | 2:B:195:ILE:HD13 | 1.82                     | 0.50              |
| 2:B:159:LYS:N    | 2:B:195:ILE:CD1  | 2.73                     | 0.50              |
| 2:B:281:ASP:C    | 2:B:283:TYR:N    | 2.64                     | 0.50              |
| 2:B:343:LEU:HD11 | 2:B:359:LEU:HD13 | 1.86                     | 0.50              |
| 2:B:562:ASN:O    | 2:B:581:TYR:HA   | 2.10                     | 0.50              |
| 3:M:56:VAL:O     | 3:M:56:VAL:HG12  | 2.10                     | 0.50              |
| 3:M:101:LEU:CG   | 3:M:106:LYS:HG3  | 2.42                     | 0.50              |
| 3:M:222:PHE:CZ   | 3:M:439:TYR:CE1  | 3.00                     | 0.50              |
| 3:M:300:LEU:HD12 | 3:M:300:LEU:C    | 2.31                     | 0.50              |
| 3:M:383:HIS:CB   | 3:M:403:THR:OG1  | 2.56                     | 0.50              |
| 4:S:16:LEU:HD22  | 4:S:125:TRP:HD1  | 1.76                     | 0.50              |
| 1:A:68:THR:CA    | 4:S:166:LYS:C    | 2.65                     | 0.50              |
| 1:A:103:LYS:C    | 1:A:107:TYR:CE1  | 2.85                     | 0.50              |
| 1:A:147:LEU:HB2  | 1:A:184:ALA:HB2  | 1.92                     | 0.50              |
| 1:A:260:PHE:O    | 1:A:261:THR:O    | 2.26                     | 0.50              |
| 1:A:566:PHE:C    | 1:A:566:PHE:CD1  | 2.83                     | 0.50              |
| 1:A:595:GLU:O    | 1:A:599:ARG:HG2  | 2.11                     | 0.50              |
| 2:B:62:ALA:O     | 2:B:66:ILE:HD11  | 1.95                     | 0.50              |
| 2:B:137:PHE:O    | 2:B:140:SER:CB   | 2.59                     | 0.50              |

*Continued on next page...*

*Continued from previous page...*

| Atom-1           | Atom-2           | Interatomic distance (Å) | Clash overlap (Å) |
|------------------|------------------|--------------------------|-------------------|
| 2:B:215:TYR:CB   | 2:B:226:LEU:HD13 | 2.39                     | 0.50              |
| 2:B:219:TYR:OH   | 2:B:225:LEU:C    | 2.47                     | 0.50              |
| 2:B:344:VAL:CG2  | 2:B:381:PHE:HZ   | 2.24                     | 0.50              |
| 2:B:501:THR:CA   | 2:B:508:ARG:NH2  | 2.75                     | 0.50              |
| 2:B:599:ALA:O    | 2:B:602:ASP:N    | 2.27                     | 0.50              |
| 3:M:1:MET:C      | 3:M:81:SER:OG    | 2.50                     | 0.50              |
| 3:M:254:PRO:CB   | 3:M:454:ILE:CD1  | 2.60                     | 0.50              |
| 3:M:265:ASN:HB3  | 3:M:309:GLN:NE2  | 2.26                     | 0.50              |
| 3:M:348:LYS:HA   | 3:M:405:THR:C    | 2.32                     | 0.50              |
| 3:M:353:VAL:CG2  | 3:M:354:ASP:O    | 2.55                     | 0.50              |
| 1:A:125:THR:HG23 | 1:A:158:LEU:HD12 | 1.94                     | 0.50              |
| 1:A:178:ARG:CB   | 1:A:214:VAL:HG13 | 2.39                     | 0.50              |
| 1:A:557:LYS:CD   | 2:B:605:PHE:HD2  | 2.24                     | 0.50              |
| 1:A:559:PHE:CD2  | 1:A:578:LEU:CD2  | 2.94                     | 0.50              |
| 1:A:581:LEU:CG   | 1:A:607:LEU:CD1  | 2.89                     | 0.50              |
| 1:A:633:PHE:CD1  | 2:B:550:VAL:CB   | 2.93                     | 0.50              |
| 2:B:127:LEU:C    | 2:B:161:LEU:HD11 | 2.31                     | 0.50              |
| 2:B:136:CYS:CB   | 2:B:168:MET:HG2  | 2.42                     | 0.50              |
| 2:B:175:LEU:CD1  | 2:B:210:CYS:SG   | 2.84                     | 0.50              |
| 2:B:281:ASP:O    | 2:B:283:TYR:O    | 2.29                     | 0.50              |
| 2:B:306:LEU:CD2  | 2:B:321:CYS:SG   | 3.00                     | 0.50              |
| 2:B:337:THR:O    | 2:B:373:LEU:HD21 | 2.10                     | 0.50              |
| 2:B:352:ASN:HB2  | 3:M:49:ASP:OD2   | 1.92                     | 0.50              |
| 2:B:371:GLN:C    | 2:B:373:LEU:H    | 2.15                     | 0.50              |
| 3:M:45:SER:HB3   | 3:M:51:LEU:CD1   | 2.40                     | 0.50              |
| 3:M:51:LEU:HD13  | 3:M:75:TRP:CE3   | 2.43                     | 0.50              |
| 3:M:100:LEU:CD1  | 3:M:100:LEU:N    | 2.73                     | 0.50              |
| 3:M:246:VAL:CA   | 3:M:470:ALA:HB2  | 2.34                     | 0.50              |
| 3:M:259:LYS:O    | 3:M:449:VAL:CA   | 2.53                     | 0.50              |
| 3:M:339:GLU:CG   | 3:M:412:ARG:CG   | 2.53                     | 0.50              |
| 4:S:34:GLN:HB2   | 4:S:58:LEU:HD11  | 1.94                     | 0.50              |
| 4:S:97:ALA:O     | 4:S:101:LEU:HB2  | 2.12                     | 0.50              |
| 1:A:371:ALA:O    | 1:A:374:LEU:HB2  | 2.12                     | 0.50              |
| 1:A:488:ARG:CD   | 1:A:522:PHE:CD2  | 2.95                     | 0.50              |
| 1:A:547:VAL:O    | 1:A:550:VAL:HB   | 2.12                     | 0.50              |
| 1:A:581:LEU:CB   | 1:A:607:LEU:HD13 | 2.42                     | 0.50              |
| 1:A:636:TYR:HB2  | 2:B:513:TRP:CZ2  | 2.46                     | 0.50              |
| 2:B:25:VAL:HG22  | 2:B:35:TYR:CD2   | 2.44                     | 0.50              |
| 2:B:68:SER:O     | 2:B:71:ALA:HB3   | 2.12                     | 0.50              |
| 2:B:132:SER:CB   | 2:B:166:SER:CB   | 2.89                     | 0.50              |
| 2:B:223:LEU:CB   | 2:B:259:TYR:CB   | 2.89                     | 0.50              |

*Continued on next page...*

*Continued from previous page...*

| Atom-1           | Atom-2           | Interatomic distance (Å) | Clash overlap (Å) |
|------------------|------------------|--------------------------|-------------------|
| 2:B:316:THR:CB   | 3:M:90:PHE:CE2   | 2.91                     | 0.50              |
| 2:B:331:PRO:C    | 2:B:333:GLN:H    | 2.14                     | 0.50              |
| 2:B:553:ALA:CB   | 2:B:614:ILE:HG23 | 2.42                     | 0.50              |
| 2:B:560:ILE:HD11 | 2:B:618:PHE:HA   | 1.92                     | 0.50              |
| 2:B:610:ARG:O    | 2:B:614:ILE:HG13 | 2.11                     | 0.50              |
| 3:M:52:ASP:CB    | 3:M:67:SER:HA    | 2.42                     | 0.50              |
| 3:M:52:ASP:HB3   | 3:M:67:SER:HA    | 1.93                     | 0.50              |
| 1:A:96:SER:CB    | 1:A:127:LEU:HD13 | 2.18                     | 0.50              |
| 1:A:254:ILE:HG21 | 4:S:100:ASP:OD2  | 2.12                     | 0.50              |
| 1:A:488:ARG:HD2  | 1:A:522:PHE:CD2  | 2.47                     | 0.50              |
| 1:A:492:ILE:HD11 | 1:A:522:PHE:CB   | 2.42                     | 0.50              |
| 2:B:21:GLU:OE2   | 2:B:35:TYR:O     | 2.30                     | 0.50              |
| 2:B:47:LEU:HD23  | 2:B:66:ILE:HG13  | 1.69                     | 0.50              |
| 2:B:120:ILE:HG21 | 2:B:150:LEU:O    | 2.11                     | 0.50              |
| 2:B:127:LEU:HA   | 2:B:135:ARG:HG2  | 1.93                     | 0.50              |
| 2:B:245:GLN:HB3  | 2:B:309:LEU:CD1  | 2.41                     | 0.50              |
| 2:B:355:ASN:O    | 2:B:359:LEU:HD22 | 2.12                     | 0.50              |
| 2:B:411:ILE:O    | 2:B:414:GLU:N    | 2.23                     | 0.50              |
| 2:B:475:ILE:HG23 | 2:B:489:ILE:HG21 | 1.93                     | 0.50              |
| 3:M:18:TYR:CE2   | 3:M:20:LEU:HD21  | 2.47                     | 0.50              |
| 3:M:51:LEU:CD1   | 3:M:51:LEU:N     | 2.73                     | 0.50              |
| 3:M:338:PHE:HE2  | 3:M:415:ILE:HG12 | 1.75                     | 0.50              |
| 3:M:374:TYR:H    | 3:M:390:ILE:CG2  | 2.25                     | 0.50              |
| 4:S:70:ASN:CG    | 4:S:73:ILE:HD12  | 2.31                     | 0.50              |
| 4:S:75:ILE:HG22  | 4:S:77:TYR:CZ    | 2.45                     | 0.50              |
| 1:A:95:MET:HB2   | 1:A:127:LEU:HD23 | 1.92                     | 0.50              |
| 1:A:96:SER:N     | 1:A:127:LEU:CG   | 2.66                     | 0.50              |
| 1:A:101:GLN:HG2  | 4:S:167:ILE:HB   | 1.84                     | 0.50              |
| 2:B:44:PRO:O     | 2:B:47:LEU:N     | 2.45                     | 0.50              |
| 2:B:60:ARG:O     | 2:B:100:LEU:CD1  | 2.60                     | 0.50              |
| 2:B:162:VAL:O    | 2:B:163:THR:C    | 2.35                     | 0.50              |
| 2:B:267:ASP:CB   | 2:B:289:PRO:CG   | 2.90                     | 0.50              |
| 2:B:461:HIS:HB2  | 2:B:463:LEU:CD2  | 2.42                     | 0.50              |
| 2:B:577:ASN:C    | 2:B:578:PRO:O    | 2.49                     | 0.50              |
| 3:M:215:TYR:CE1  | 3:M:468:LYS:CB   | 2.95                     | 0.50              |
| 3:M:220:GLU:CD   | 3:M:222:PHE:CZ   | 2.85                     | 0.50              |
| 3:M:224:VAL:O    | 3:M:479:PHE:C    | 2.49                     | 0.50              |
| 4:S:16:LEU:HB2   | 4:S:125:TRP:CD1  | 2.47                     | 0.50              |
| 4:S:17:VAL:CG1   | 4:S:19:PHE:CZ    | 2.95                     | 0.50              |
| 4:S:75:ILE:HB    | 4:S:77:TYR:HE1   | 1.76                     | 0.50              |
| 1:A:91:ILE:HG22  | 1:A:95:MET:HE2   | 1.93                     | 0.50              |

*Continued on next page...*



*Continued from previous page...*

| Atom-1           | Atom-2           | Interatomic distance (Å) | Clash overlap (Å) |
|------------------|------------------|--------------------------|-------------------|
| 1:A:92:LEU:HD13  | 1:A:123:LEU:HB2  | 1.93                     | 0.50              |
| 1:A:141:VAL:CG1  | 4:S:159:ALA:CA   | 2.89                     | 0.50              |
| 1:A:150:LEU:CD2  | 1:A:162:ILE:HG12 | 2.41                     | 0.50              |
| 1:A:251:TRP:CE3  | 1:A:254:ILE:HD12 | 2.47                     | 0.50              |
| 1:A:432:ILE:O    | 1:A:435:ILE:HB   | 2.11                     | 0.50              |
| 2:B:162:VAL:HG23 | 2:B:173:VAL:HG11 | 1.94                     | 0.50              |
| 2:B:252:LEU:CB   | 2:B:302:PHE:CD1  | 2.93                     | 0.50              |
| 2:B:325:LEU:HB3  | 2:B:334:MET:HE1  | 1.93                     | 0.50              |
| 2:B:512:VAL:O    | 2:B:515:PHE:HB2  | 2.12                     | 0.50              |
| 3:M:380:ARG:NH1  | 3:M:412:ARG:NH1  | 2.60                     | 0.50              |
| 1:A:78:GLU:C     | 1:A:80:TYR:O     | 2.50                     | 0.50              |
| 1:A:145:ILE:HG12 | 4:S:156:LEU:CD2  | 2.37                     | 0.50              |
| 1:A:200:PHE:CZ   | 1:A:232:PRO:O    | 2.62                     | 0.50              |
| 1:A:497:LYS:O    | 1:A:501:ASN:N    | 2.44                     | 0.50              |
| 1:A:556:VAL:HG22 | 1:A:603:VAL:HG13 | 1.93                     | 0.50              |
| 1:A:573:GLU:O    | 1:A:575:LYS:N    | 2.45                     | 0.50              |
| 2:B:143:SER:HB2  | 2:B:179:LYS:CG   | 2.42                     | 0.50              |
| 2:B:144:ASP:N    | 2:B:179:LYS:HD2  | 2.22                     | 0.50              |
| 2:B:197:LYS:CB   | 2:B:229:HIS:CD2  | 2.89                     | 0.50              |
| 2:B:452:LYS:NZ   | 2:B:456:ASP:OD2  | 2.44                     | 0.50              |
| 2:B:553:ALA:CA   | 2:B:614:ILE:HG23 | 2.39                     | 0.50              |
| 3:M:115:VAL:O    | 3:M:116:ASN:C    | 2.46                     | 0.50              |
| 3:M:375:LYS:CE   | 3:M:418:GLU:OE1  | 2.60                     | 0.50              |
| 4:S:78:LYS:O     | 4:S:84:TYR:HA    | 2.12                     | 0.50              |
| 1:A:166:LEU:O    | 1:A:170:LEU:HD23 | 2.12                     | 0.49              |
| 1:A:212:ILE:CB   | 4:S:145:ASN:HD22 | 2.25                     | 0.49              |
| 2:B:256:CYS:CA   | 2:B:293:VAL:HG21 | 2.31                     | 0.49              |
| 2:B:560:ILE:HA   | 2:B:564:LYS:N    | 2.22                     | 0.49              |
| 3:M:6:TYR:CG     | 3:M:14:LEU:HD11  | 2.46                     | 0.49              |
| 3:M:235:LEU:HD23 | 3:M:235:LEU:O    | 2.11                     | 0.49              |
| 3:M:256:VAL:HG22 | 3:M:452:ILE:HG23 | 1.92                     | 0.49              |
| 3:M:373:ALA:CB   | 3:M:418:GLU:O    | 2.57                     | 0.49              |
| 3:M:396:GLN:HG2  | 3:M:398:ILE:CD1  | 2.40                     | 0.49              |
| 3:M:424:PHE:HZ   | 3:M:428:VAL:CG2  | 2.25                     | 0.49              |
| 3:M:452:ILE:CD1  | 3:M:452:ILE:N    | 2.73                     | 0.49              |
| 4:S:4:ALA:HB2    | 4:S:19:PHE:HD2   | 1.77                     | 0.49              |
| 1:A:104:ARG:HB3  | 4:S:160:ALA:HB2  | 1.95                     | 0.49              |
| 1:A:133:LYS:HE2  | 1:A:165:ASP:OD1  | 2.11                     | 0.49              |
| 1:A:139:ASP:OD1  | 1:A:177:ILE:CD1  | 2.60                     | 0.49              |
| 1:A:186:PHE:HD1  | 1:A:224:GLU:HB3  | 1.76                     | 0.49              |
| 1:A:349:ILE:O    | 1:A:352:PHE:N    | 2.42                     | 0.49              |

*Continued on next page...*

*Continued from previous page...*

| Atom-1           | Atom-2           | Interatomic distance (Å) | Clash overlap (Å) |
|------------------|------------------|--------------------------|-------------------|
| 1:A:395:PHE:CD2  | 1:A:420:ILE:HD13 | 2.47                     | 0.49              |
| 1:A:420:ILE:O    | 1:A:421:PRO:O    | 2.30                     | 0.49              |
| 1:A:433:ILE:HD11 | 1:A:473:ILE:HA   | 1.94                     | 0.49              |
| 1:A:461:CYS:O    | 1:A:462:GLN:O    | 2.30                     | 0.49              |
| 1:A:549:GLU:O    | 1:A:553:LEU:HG   | 2.12                     | 0.49              |
| 2:B:81:LEU:O     | 2:B:84:ALA:N     | 2.45                     | 0.49              |
| 2:B:109:ALA:HB2  | 2:B:145:MET:SD   | 2.53                     | 0.49              |
| 2:B:332:LEU:O    | 2:B:332:LEU:CG   | 2.60                     | 0.49              |
| 2:B:349:MET:O    | 2:B:351:GLU:OE2  | 2.30                     | 0.49              |
| 2:B:418:TYR:CG   | 2:B:424:PHE:CE1  | 3.00                     | 0.49              |
| 2:B:494:ALA:HB2  | 2:B:529:VAL:HG22 | 1.94                     | 0.49              |
| 2:B:534:ILE:HG12 | 2:B:595:VAL:HG23 | 1.93                     | 0.49              |
| 3:M:260:LEU:CA   | 3:M:448:TYR:O    | 2.59                     | 0.49              |
| 3:M:288:ILE:HG22 | 3:M:289:THR:N    | 2.27                     | 0.49              |
| 3:M:323:MET:CE   | 3:M:342:LEU:CB   | 2.89                     | 0.49              |
| 3:M:379:LEU:CD2  | 3:M:397:TRP:NE1  | 2.66                     | 0.49              |
| 1:A:100:LEU:HD11 | 4:S:157:ASN:O    | 2.12                     | 0.49              |
| 1:A:217:ALA:CA   | 4:S:142:ILE:CA   | 2.53                     | 0.49              |
| 1:A:456:ASP:O    | 1:A:459:MET:N    | 2.37                     | 0.49              |
| 1:A:602:GLU:OE1  | 1:A:633:PHE:HE1  | 1.95                     | 0.49              |
| 1:A:623:MET:O    | 2:B:617:LEU:CG   | 2.60                     | 0.49              |
| 2:B:343:LEU:HD23 | 2:B:363:ILE:HD13 | 1.93                     | 0.49              |
| 2:B:421:SER:C    | 2:B:422:ALA:O    | 2.42                     | 0.49              |
| 3:M:244:VAL:CG2  | 3:M:472:TYR:CE2  | 2.94                     | 0.49              |
| 3:M:296:LYS:HG3  | 3:M:296:LYS:O    | 2.12                     | 0.49              |
| 3:M:320:ILE:CG2  | 3:M:321:GLY:N    | 2.75                     | 0.49              |
| 3:M:371:GLU:HB3  | 3:M:424:PHE:CD1  | 2.45                     | 0.49              |
| 1:A:179:LYS:HG3  | 1:A:217:ALA:CB   | 2.35                     | 0.49              |
| 1:A:244:LEU:CG   | 1:A:277:LYS:HG3  | 2.39                     | 0.49              |
| 1:A:441:TYR:HB3  | 1:A:444:VAL:HG22 | 1.91                     | 0.49              |
| 1:A:630:PRO:CB   | 2:B:614:ILE:CG2  | 2.88                     | 0.49              |
| 2:B:125:LYS:O    | 2:B:128:SER:N    | 2.45                     | 0.49              |
| 2:B:132:SER:CB   | 2:B:169:VAL:HG21 | 2.41                     | 0.49              |
| 2:B:267:ASP:CA   | 2:B:289:PRO:HB3  | 2.39                     | 0.49              |
| 2:B:284:ASN:HB3  | 2:B:285:GLU:HG3  | 1.91                     | 0.49              |
| 2:B:334:MET:CE   | 2:B:339:PHE:CD1  | 2.94                     | 0.49              |
| 3:M:74:TYR:HB3   | 3:M:114:ILE:HD11 | 1.95                     | 0.49              |
| 3:M:222:PHE:CD1  | 3:M:222:PHE:N    | 2.80                     | 0.49              |
| 3:M:317:MET:CB   | 3:M:322:LEU:N    | 2.65                     | 0.49              |
| 4:S:14:PRO:CA    | 4:S:36:TYR:CZ    | 2.95                     | 0.49              |
| 4:S:17:VAL:HG13  | 4:S:17:VAL:O     | 2.12                     | 0.49              |

*Continued on next page...*

*Continued from previous page...*

| Atom-1           | Atom-2           | Interatomic distance (Å) | Clash overlap (Å) |
|------------------|------------------|--------------------------|-------------------|
| 4:S:51:LEU:HB2   | 4:S:77:TYR:CE1   | 2.47                     | 0.49              |
| 1:A:153:ILE:CG2  | 1:A:158:LEU:HD23 | 2.42                     | 0.49              |
| 1:A:403:LEU:HG   | 1:A:420:ILE:O    | 2.12                     | 0.49              |
| 1:A:440:ASN:OD1  | 1:A:442:SER:CB   | 2.58                     | 0.49              |
| 1:A:552:ILE:HD13 | 1:A:600:SER:OG   | 2.12                     | 0.49              |
| 2:B:143:SER:C    | 2:B:145:MET:H    | 2.14                     | 0.49              |
| 2:B:223:LEU:HD11 | 2:B:258:GLN:O    | 2.08                     | 0.49              |
| 2:B:267:ASP:OD1  | 2:B:269:SER:HB2  | 2.12                     | 0.49              |
| 2:B:393:ILE:HG21 | 2:B:431:MET:HB2  | 1.95                     | 0.49              |
| 3:M:244:VAL:C    | 3:M:472:TYR:CD2  | 2.81                     | 0.49              |
| 3:M:350:VAL:HG22 | 3:M:442:GLN:NE2  | 2.28                     | 0.49              |
| 1:A:317:GLU:CG   | 1:A:351:ARG:HH12 | 2.26                     | 0.49              |
| 1:A:421:PRO:HB2  | 1:A:424:TYR:HD1  | 1.78                     | 0.49              |
| 2:B:132:SER:O    | 2:B:136:CYS:SG   | 2.70                     | 0.49              |
| 2:B:221:ASP:O    | 2:B:223:LEU:HG   | 2.11                     | 0.49              |
| 2:B:257:LYS:HA   | 2:B:260:LEU:CD2  | 2.42                     | 0.49              |
| 2:B:299:LEU:O    | 2:B:299:LEU:HD13 | 2.13                     | 0.49              |
| 2:B:315:PRO:CB   | 2:B:355:ASN:ND2  | 2.51                     | 0.49              |
| 2:B:340:ILE:O    | 2:B:343:LEU:HB3  | 2.12                     | 0.49              |
| 2:B:424:PHE:CE2  | 2:B:428:VAL:HG11 | 2.45                     | 0.49              |
| 2:B:427:ASN:HA   | 2:B:430:ILE:HD12 | 1.94                     | 0.49              |
| 2:B:436:LEU:HB3  | 2:B:450:VAL:HG13 | 1.93                     | 0.49              |
| 4:S:69:ASN:CG    | 4:S:71:GLU:O     | 2.51                     | 0.49              |
| 1:A:65:ASN:C     | 4:S:165:SER:CA   | 2.81                     | 0.49              |
| 1:A:123:LEU:O    | 1:A:127:LEU:HB2  | 2.13                     | 0.49              |
| 1:A:170:LEU:CG   | 1:A:206:LYS:HG3  | 2.42                     | 0.49              |
| 1:A:224:GLU:H    | 4:S:140:MET:HE3  | 1.78                     | 0.49              |
| 1:A:557:LYS:CG   | 2:B:606:ASP:CA   | 2.89                     | 0.49              |
| 2:B:120:ILE:CG2  | 2:B:153:ILE:HB   | 2.41                     | 0.49              |
| 2:B:132:SER:O    | 2:B:169:VAL:CG2  | 2.60                     | 0.49              |
| 2:B:227:HIS:O    | 2:B:230:PHE:N    | 2.44                     | 0.49              |
| 2:B:292:GLU:CG   | 2:B:295:ASN:O    | 2.60                     | 0.49              |
| 2:B:362:ALA:O    | 2:B:366:LEU:CG   | 2.58                     | 0.49              |
| 2:B:455:ILE:O    | 2:B:458:MET:N    | 2.46                     | 0.49              |
| 2:B:494:ALA:CB   | 2:B:529:VAL:HG13 | 2.43                     | 0.49              |
| 2:B:513:TRP:HE1  | 2:B:517:GLU:HG3  | 1.77                     | 0.49              |
| 3:M:103:TYR:CG   | 3:M:124:ILE:HD11 | 2.48                     | 0.49              |
| 3:M:106:LYS:O    | 3:M:106:LYS:HG2  | 2.13                     | 0.49              |
| 3:M:218:LEU:HB3  | 3:M:442:GLN:O    | 2.11                     | 0.49              |
| 3:M:315:VAL:O    | 3:M:315:VAL:HG12 | 2.11                     | 0.49              |
| 3:M:443:SER:HB2  | 3:M:447:ILE:N    | 2.27                     | 0.49              |

*Continued on next page...*

*Continued from previous page...*

| Atom-1           | Atom-2           | Interatomic distance (Å) | Clash overlap (Å) |
|------------------|------------------|--------------------------|-------------------|
| 4:S:9:ASN:CG     | 4:S:13:GLN:CB    | 2.79                     | 0.49              |
| 1:A:65:ASN:C     | 4:S:165:SER:HA   | 2.33                     | 0.49              |
| 1:A:67:LYS:CD    | 1:A:102:GLN:OE1  | 2.60                     | 0.49              |
| 1:A:589:SER:HB2  | 1:A:601:VAL:HG23 | 1.92                     | 0.49              |
| 1:A:624:LEU:O    | 2:B:613:MET:CE   | 2.50                     | 0.49              |
| 2:B:106:LEU:HD22 | 2:B:144:ASP:OD2  | 2.13                     | 0.49              |
| 2:B:123:LEU:HD22 | 2:B:138:ALA:CB   | 2.43                     | 0.49              |
| 2:B:237:ILE:HG21 | 2:B:305:SER:CB   | 2.35                     | 0.49              |
| 2:B:275:ARG:CG   | 2:B:294:VAL:HG21 | 2.42                     | 0.49              |
| 2:B:343:LEU:HD21 | 2:B:363:ILE:N    | 2.27                     | 0.49              |
| 2:B:346:THR:HG23 | 2:B:350:THR:CG2  | 2.30                     | 0.49              |
| 2:B:389:ILE:CG2  | 2:B:427:ASN:CB   | 2.81                     | 0.49              |
| 3:M:225:VAL:C    | 3:M:480:GLN:O    | 2.50                     | 0.49              |
| 3:M:265:ASN:O    | 3:M:267:ILE:N    | 2.45                     | 0.49              |
| 1:A:84:MET:SD    | 1:A:113:SER:HA   | 2.52                     | 0.49              |
| 2:B:150:LEU:O    | 2:B:154:ILE:HD12 | 2.08                     | 0.49              |
| 2:B:178:ILE:HG23 | 2:B:217:GLU:CA   | 2.43                     | 0.49              |
| 2:B:200:MET:O    | 2:B:202:ASP:N    | 2.45                     | 0.49              |
| 2:B:394:TRP:CE3  | 2:B:397:GLN:OE1  | 2.64                     | 0.49              |
| 2:B:513:TRP:CE3  | 2:B:551:LEU:HD21 | 2.40                     | 0.49              |
| 2:B:572:GLU:O    | 2:B:575:ASN:N    | 2.28                     | 0.49              |
| 3:M:101:LEU:HB2  | 3:M:109:LEU:HD13 | 1.94                     | 0.49              |
| 3:M:276:VAL:HG21 | 3:M:299:LEU:HD12 | 1.93                     | 0.49              |
| 3:M:331:LEU:HD22 | 3:M:426:LYS:HZ2  | 1.77                     | 0.49              |
| 4:S:33:GLU:O     | 4:S:36:TYR:HB2   | 2.12                     | 0.49              |
| 1:A:275:LEU:HA   | 1:A:278:ILE:CG1  | 2.43                     | 0.49              |
| 1:A:398:GLU:O    | 1:A:419:ILE:CA   | 2.61                     | 0.49              |
| 1:A:627:GLU:HB3  | 2:B:617:LEU:HB3  | 1.90                     | 0.49              |
| 1:A:633:PHE:CB   | 2:B:550:VAL:O    | 2.58                     | 0.49              |
| 2:B:80:GLN:HA    | 2:B:115:LEU:HD11 | 1.95                     | 0.49              |
| 2:B:151:ALA:HB2  | 2:B:180:LEU:O    | 2.13                     | 0.49              |
| 2:B:559:ASP:O    | 2:B:562:ASN:CB   | 2.61                     | 0.49              |
| 3:M:1:MET:HB3    | 3:M:81:SER:HB3   | 1.95                     | 0.49              |
| 3:M:235:LEU:HD11 | 3:M:306:LEU:CD1  | 2.42                     | 0.49              |
| 1:A:105:VAL:O    | 1:A:108:LEU:HB2  | 2.13                     | 0.48              |
| 1:A:252:ILE:HA   | 4:S:144:THR:CB   | 2.30                     | 0.48              |
| 1:A:319:LEU:O    | 1:A:321:THR:N    | 2.46                     | 0.48              |
| 1:A:582:ILE:HD11 | 1:A:608:ARG:N    | 2.28                     | 0.48              |
| 1:A:589:SER:CB   | 1:A:601:VAL:HG23 | 2.42                     | 0.48              |
| 2:B:38:TYR:HD1   | 2:B:38:TYR:N     | 2.10                     | 0.48              |
| 2:B:77:ILE:HG23  | 2:B:82:TYR:CE1   | 2.42                     | 0.48              |

*Continued on next page...*

*Continued from previous page...*

| Atom-1           | Atom-2           | Interatomic distance (Å) | Clash overlap (Å) |
|------------------|------------------|--------------------------|-------------------|
| 2:B:92:THR:HG22  | 2:B:93:ASN:N     | 2.27                     | 0.48              |
| 2:B:143:SER:C    | 2:B:145:MET:N    | 2.66                     | 0.48              |
| 2:B:231:ARG:C    | 2:B:233:TYR:N    | 2.65                     | 0.48              |
| 2:B:353:GLN:HB2  | 3:M:50:TYR:H     | 1.71                     | 0.48              |
| 2:B:520:SER:C    | 2:B:523:PHE:CD2  | 2.86                     | 0.48              |
| 3:M:3:LEU:CD1    | 3:M:80:THR:O     | 2.61                     | 0.48              |
| 3:M:101:LEU:CG   | 3:M:106:LYS:CG   | 2.91                     | 0.48              |
| 3:M:224:VAL:CG1  | 3:M:226:PHE:CZ   | 2.89                     | 0.48              |
| 3:M:226:PHE:CD2  | 3:M:235:LEU:HA   | 2.48                     | 0.48              |
| 3:M:245:ASP:C    | 3:M:246:VAL:CG2  | 2.81                     | 0.48              |
| 3:M:389:SER:N    | 3:M:394:GLN:O    | 2.33                     | 0.48              |
| 1:A:179:LYS:HD3  | 4:S:152:SER:OG   | 2.13                     | 0.48              |
| 1:A:408:ILE:HG21 | 4:S:64:ASN:HB3   | 1.82                     | 0.48              |
| 1:A:512:LEU:HD13 | 1:A:543:TYR:CZ   | 2.48                     | 0.48              |
| 2:B:146:LYS:C    | 2:B:147:MET:CG   | 2.80                     | 0.48              |
| 2:B:174:ALA:O    | 2:B:214:ALA:HB2  | 2.07                     | 0.48              |
| 2:B:219:TYR:HD1  | 2:B:226:LEU:CD1  | 2.06                     | 0.48              |
| 2:B:237:ILE:CG2  | 2:B:238:LYS:N    | 2.76                     | 0.48              |
| 3:M:93:LEU:O     | 3:M:96:ILE:HB    | 2.14                     | 0.48              |
| 3:M:215:TYR:CD1  | 3:M:468:LYS:CB   | 2.94                     | 0.48              |
| 3:M:222:PHE:CG   | 3:M:240:ILE:HG12 | 2.48                     | 0.48              |
| 3:M:235:LEU:HD13 | 3:M:310:VAL:HG21 | 1.95                     | 0.48              |
| 3:M:386:PHE:CB   | 3:M:397:TRP:HD1  | 2.26                     | 0.48              |
| 3:M:435:LEU:O    | 3:M:437:TYR:CE1  | 2.66                     | 0.48              |
| 4:S:53:THR:CG2   | 4:S:68:VAL:C     | 2.80                     | 0.48              |
| 1:A:102:GLN:O    | 4:S:167:ILE:HD11 | 2.13                     | 0.48              |
| 2:B:5:ILE:HA     | 2:B:8:ILE:CD1    | 2.38                     | 0.48              |
| 2:B:56:SER:O     | 2:B:97:VAL:CG2   | 2.61                     | 0.48              |
| 2:B:293:VAL:O    | 2:B:299:LEU:HB3  | 2.04                     | 0.48              |
| 2:B:418:TYR:HD1  | 2:B:424:PHE:CE1  | 2.26                     | 0.48              |
| 2:B:447:GLU:O    | 2:B:450:VAL:HB   | 2.13                     | 0.48              |
| 2:B:580:TYR:O    | 2:B:582:ASP:N    | 2.43                     | 0.48              |
| 3:M:7:ILE:HA     | 3:M:76:CYS:CA    | 2.28                     | 0.48              |
| 3:M:226:PHE:CD1  | 3:M:481:VAL:HG22 | 2.49                     | 0.48              |
| 3:M:235:LEU:HD11 | 3:M:306:LEU:HD13 | 1.94                     | 0.48              |
| 4:S:80:TYR:CG    | 4:S:106:VAL:CG1  | 2.96                     | 0.48              |
| 1:A:316:LEU:HD12 | 1:A:348:PHE:CZ   | 2.45                     | 0.48              |
| 2:B:98:LYS:HD2   | 2:B:102:HIS:CE1  | 2.48                     | 0.48              |
| 2:B:230:PHE:CE2  | 2:B:298:ASP:C    | 2.77                     | 0.48              |
| 2:B:302:PHE:CE1  | 2:B:306:LEU:HD21 | 2.48                     | 0.48              |
| 2:B:389:ILE:HG21 | 2:B:427:ASN:CB   | 2.35                     | 0.48              |

*Continued on next page...*

*Continued from previous page...*

| Atom-1           | Atom-2           | Interatomic distance (Å) | Clash overlap (Å) |
|------------------|------------------|--------------------------|-------------------|
| 2:B:513:TRP:NE1  | 2:B:517:GLU:CG   | 2.76                     | 0.48              |
| 2:B:538:SER:CA   | 2:B:598:LEU:HD22 | 2.43                     | 0.48              |
| 2:B:542:PRO:O    | 2:B:545:ARG:HB2  | 2.14                     | 0.48              |
| 2:B:589:SER:OG   | 2:B:618:PHE:HE2  | 1.90                     | 0.48              |
| 3:M:224:VAL:HG22 | 3:M:306:LEU:CD1  | 2.41                     | 0.48              |
| 3:M:228:LYS:HZ2  | 3:M:327:PHE:H    | 1.58                     | 0.48              |
| 3:M:249:TYR:CE1  | 3:M:467:TYR:CE1  | 3.02                     | 0.48              |
| 3:M:323:MET:SD   | 3:M:342:LEU:CA   | 3.01                     | 0.48              |
| 3:M:338:PHE:CE2  | 3:M:415:ILE:HD11 | 2.48                     | 0.48              |
| 3:M:347:PHE:HA   | 3:M:350:VAL:HG23 | 1.96                     | 0.48              |
| 1:A:207:LEU:CD1  | 1:A:240:LEU:HD23 | 2.38                     | 0.48              |
| 1:A:304:LEU:C    | 1:A:304:LEU:HD23 | 2.34                     | 0.48              |
| 1:A:384:LEU:C    | 1:A:384:LEU:HD12 | 2.34                     | 0.48              |
| 1:A:478:ARG:O    | 1:A:482:ILE:HG13 | 2.13                     | 0.48              |
| 2:B:80:GLN:HG2   | 2:B:115:LEU:CD2  | 2.43                     | 0.48              |
| 2:B:139:LEU:CD2  | 2:B:173:VAL:CB   | 2.87                     | 0.48              |
| 2:B:277:CYS:HA   | 2:B:295:ASN:O    | 2.13                     | 0.48              |
| 2:B:360:LEU:HB3  | 2:B:394:TRP:HB2  | 1.95                     | 0.48              |
| 2:B:393:ILE:CG1  | 2:B:428:VAL:HA   | 2.40                     | 0.48              |
| 2:B:541:GLY:O    | 2:B:544:THR:HB   | 2.14                     | 0.48              |
| 3:M:65:TYR:CG    | 3:M:86:PRO:CA    | 2.93                     | 0.48              |
| 3:M:240:ILE:HG22 | 3:M:444:ALA:CB   | 2.42                     | 0.48              |
| 3:M:319:SER:CB   | 3:M:346:ASN:C    | 2.81                     | 0.48              |
| 3:M:380:ARG:HH11 | 3:M:412:ARG:HH11 | 1.59                     | 0.48              |
| 1:A:67:LYS:HB3   | 4:S:166:LYS:HG2  | 1.86                     | 0.48              |
| 1:A:78:GLU:O     | 1:A:80:TYR:C     | 2.52                     | 0.48              |
| 1:A:121:LEU:HD13 | 1:A:155:THR:CG2  | 2.44                     | 0.48              |
| 1:A:153:ILE:HG22 | 1:A:158:LEU:HD23 | 1.94                     | 0.48              |
| 1:A:350:SER:O    | 1:A:352:PHE:N    | 2.46                     | 0.48              |
| 1:A:384:LEU:HD13 | 1:A:435:ILE:HG21 | 1.86                     | 0.48              |
| 1:A:509:PRO:CB   | 1:A:547:VAL:HG21 | 2.38                     | 0.48              |
| 1:A:594:PHE:CG   | 2:B:434:LYS:HE2  | 2.48                     | 0.48              |
| 2:B:27:THR:HG22  | 2:B:27:THR:O     | 2.14                     | 0.48              |
| 2:B:56:SER:HB2   | 2:B:92:THR:CG2   | 2.30                     | 0.48              |
| 2:B:126:SER:O    | 2:B:127:LEU:C    | 2.49                     | 0.48              |
| 2:B:429:VAL:O    | 2:B:433:VAL:HG23 | 2.12                     | 0.48              |
| 3:M:241:HIS:CD2  | 3:M:475:GLN:H    | 2.29                     | 0.48              |
| 4:S:57:LEU:CA    | 4:S:60:SER:HB2   | 2.41                     | 0.48              |
| 1:A:132:LEU:CB   | 1:A:165:ASP:HB3  | 2.44                     | 0.48              |
| 1:A:196:LEU:O    | 1:A:197:ARG:O    | 2.31                     | 0.48              |
| 1:A:320:HIS:ND1  | 1:A:352:PHE:HD2  | 2.12                     | 0.48              |

*Continued on next page...*

*Continued from previous page...*

| Atom-1           | Atom-2           | Interatomic distance (Å) | Clash overlap (Å) |
|------------------|------------------|--------------------------|-------------------|
| 1:A:402:ILE:O    | 1:A:402:ILE:HG23 | 2.12                     | 0.48              |
| 1:A:516:ILE:HD13 | 1:A:551:LEU:CD1  | 2.43                     | 0.48              |
| 1:A:556:VAL:HG22 | 1:A:603:VAL:HG11 | 1.94                     | 0.48              |
| 1:A:556:VAL:HG21 | 1:A:603:VAL:HG13 | 1.96                     | 0.48              |
| 2:B:83:PHE:CE2   | 2:B:119:SER:HA   | 2.38                     | 0.48              |
| 2:B:279:LEU:CB   | 2:B:288:TYR:HD1  | 2.23                     | 0.48              |
| 2:B:377:TYR:O    | 2:B:380:LYS:CB   | 2.49                     | 0.48              |
| 2:B:394:TRP:CZ3  | 2:B:397:GLN:NE2  | 2.82                     | 0.48              |
| 2:B:396:ILE:HD13 | 2:B:418:TYR:CE2  | 2.43                     | 0.48              |
| 2:B:515:PHE:CD2  | 2:B:529:VAL:HG21 | 2.44                     | 0.48              |
| 2:B:542:PRO:CA   | 2:B:602:ASP:OD1  | 2.61                     | 0.48              |
| 1:A:154:ILE:O    | 1:A:155:THR:C    | 2.49                     | 0.48              |
| 1:A:316:LEU:O    | 1:A:319:LEU:HB2  | 2.13                     | 0.48              |
| 1:A:416:ILE:O    | 1:A:417:PRO:C    | 2.40                     | 0.48              |
| 2:B:106:LEU:CG   | 2:B:144:ASP:CB   | 2.86                     | 0.48              |
| 2:B:227:HIS:CE1  | 2:B:292:GLU:CG   | 2.96                     | 0.48              |
| 2:B:237:ILE:HG12 | 2:B:245:GLN:HG2  | 1.95                     | 0.48              |
| 2:B:433:VAL:C    | 2:B:474:VAL:HG21 | 2.33                     | 0.48              |
| 2:B:440:GLY:C    | 2:B:442:LEU:N    | 2.61                     | 0.48              |
| 2:B:515:PHE:CE2  | 2:B:529:VAL:CG1  | 2.95                     | 0.48              |
| 2:B:519:ALA:CB   | 2:B:555:LEU:HD13 | 2.44                     | 0.48              |
| 2:B:538:SER:HB3  | 2:B:598:LEU:CD2  | 2.44                     | 0.48              |
| 2:B:589:SER:C    | 2:B:591:MET:N    | 2.65                     | 0.48              |
| 3:M:6:TYR:CB     | 3:M:16:PHE:O     | 2.62                     | 0.48              |
| 3:M:217:ASP:C    | 3:M:472:TYR:CZ   | 2.87                     | 0.48              |
| 3:M:221:THR:HA   | 3:M:437:TYR:O    | 2.13                     | 0.48              |
| 3:M:234:ARG:O    | 3:M:235:LEU:C    | 2.51                     | 0.48              |
| 3:M:243:ILE:CG2  | 3:M:298:ARG:HG2  | 2.43                     | 0.48              |
| 3:M:319:SER:HG   | 3:M:346:ASN:CB   | 2.05                     | 0.48              |
| 4:S:5:VAL:O      | 4:S:18:LYS:N     | 2.44                     | 0.48              |
| 4:S:17:VAL:HG13  | 4:S:19:PHE:HE1   | 1.74                     | 0.48              |
| 1:A:144:GLY:HA3  | 1:A:180:LYS:HG3  | 1.96                     | 0.48              |
| 1:A:215:VAL:O    | 1:A:216:SER:O    | 2.31                     | 0.48              |
| 1:A:381:GLU:CA   | 1:A:384:LEU:HD23 | 2.39                     | 0.48              |
| 1:A:454:ILE:CG2  | 1:A:473:ILE:CG2  | 2.92                     | 0.48              |
| 1:A:488:ARG:CD   | 1:A:522:PHE:CE2  | 2.96                     | 0.48              |
| 2:B:80:GLN:CA    | 2:B:115:LEU:HD11 | 2.43                     | 0.48              |
| 2:B:417:TYR:O    | 2:B:421:SER:CB   | 2.62                     | 0.48              |
| 3:M:7:ILE:HG21   | 3:M:74:TYR:HB2   | 1.96                     | 0.48              |
| 3:M:215:TYR:CD1  | 3:M:468:LYS:CG   | 2.97                     | 0.48              |
| 3:M:234:ARG:O    | 3:M:236:LEU:N    | 2.47                     | 0.48              |

*Continued on next page...*

*Continued from previous page...*

| Atom-1           | Atom-2           | Interatomic distance (Å) | Clash overlap (Å) |
|------------------|------------------|--------------------------|-------------------|
| 1:A:125:THR:CG2  | 1:A:158:LEU:HA   | 2.43                     | 0.48              |
| 1:A:306:GLU:O    | 1:A:308:ASP:N    | 2.47                     | 0.48              |
| 1:A:446:ASP:C    | 1:A:448:GLU:O    | 2.52                     | 0.48              |
| 2:B:44:PRO:HA    | 2:B:47:LEU:HD12  | 1.96                     | 0.48              |
| 2:B:155:LEU:O    | 2:B:158:VAL:N    | 2.47                     | 0.48              |
| 2:B:340:ILE:CB   | 2:B:373:LEU:HG   | 2.44                     | 0.48              |
| 2:B:380:LYS:NZ   | 3:M:236:LEU:HD11 | 2.28                     | 0.48              |
| 2:B:522:GLU:C    | 2:B:524:LYS:N    | 2.67                     | 0.48              |
| 3:M:10:THR:HA    | 3:M:75:TRP:CE2   | 2.47                     | 0.48              |
| 3:M:10:THR:N     | 3:M:75:TRP:NE1   | 2.62                     | 0.48              |
| 3:M:260:LEU:O    | 3:M:286:SER:HB3  | 2.14                     | 0.48              |
| 3:M:300:LEU:HD11 | 3:M:447:ILE:CD1  | 2.41                     | 0.48              |
| 1:A:100:LEU:CB   | 1:A:142:LYS:HG3  | 2.44                     | 0.47              |
| 1:A:408:ILE:CD1  | 1:A:410:TYR:HD1  | 2.27                     | 0.47              |
| 1:A:610:SER:OG   | 1:A:625:LEU:CD1  | 2.52                     | 0.47              |
| 2:B:136:CYS:HA   | 2:B:172:GLU:CB   | 2.41                     | 0.47              |
| 2:B:540:GLU:OE1  | 2:B:548:ILE:CD1  | 2.62                     | 0.47              |
| 2:B:542:PRO:HB3  | 2:B:602:ASP:OD1  | 2.14                     | 0.47              |
| 3:M:9:ASP:C      | 3:M:75:TRP:NE1   | 2.64                     | 0.47              |
| 3:M:16:PHE:HZ    | 3:M:18:TYR:CD1   | 2.32                     | 0.47              |
| 3:M:244:VAL:CA   | 3:M:472:TYR:CG   | 2.76                     | 0.47              |
| 3:M:324:SER:O    | 3:M:340:LEU:HA   | 2.14                     | 0.47              |
| 4:S:47:GLN:NE2   | 4:S:78:LYS:C     | 2.63                     | 0.47              |
| 1:A:79:MET:HG3   | 1:A:112:GLN:OE1  | 2.14                     | 0.47              |
| 1:A:216:SER:HB3  | 4:S:143:GLU:CA   | 2.13                     | 0.47              |
| 1:A:384:LEU:HD12 | 1:A:385:LYS:N    | 2.28                     | 0.47              |
| 1:A:429:VAL:CG1  | 1:A:473:ILE:HD11 | 2.40                     | 0.47              |
| 1:A:563:CYS:SG   | 1:A:621:LEU:HG   | 2.54                     | 0.47              |
| 1:A:625:LEU:C    | 1:A:627:GLU:N    | 2.68                     | 0.47              |
| 1:A:633:PHE:CA   | 2:B:554:LYS:HB2  | 2.15                     | 0.47              |
| 2:B:117:LEU:HD21 | 2:B:149:SER:HB2  | 1.92                     | 0.47              |
| 2:B:207:VAL:O    | 2:B:210:CYS:HB2  | 2.14                     | 0.47              |
| 2:B:278:PRO:CA   | 2:B:288:TYR:HB2  | 2.29                     | 0.47              |
| 2:B:304:GLN:O    | 2:B:307:ASN:HB2  | 2.14                     | 0.47              |
| 2:B:414:GLU:O    | 2:B:417:TYR:HB3  | 2.14                     | 0.47              |
| 2:B:425:PRO:HD2  | 2:B:428:VAL:CG2  | 2.39                     | 0.47              |
| 3:M:124:ILE:O    | 3:M:127:CYS:N    | 2.47                     | 0.47              |
| 3:M:245:ASP:N    | 3:M:472:TYR:CE2  | 2.82                     | 0.47              |
| 3:M:364:VAL:HG12 | 3:M:372:ILE:HG13 | 1.95                     | 0.47              |
| 4:S:35:VAL:HG12  | 4:S:68:VAL:CG1   | 2.44                     | 0.47              |
| 4:S:50:PHE:HB2   | 4:S:75:ILE:O     | 2.14                     | 0.47              |

*Continued on next page...*



*Continued from previous page...*

| Atom-1           | Atom-2           | Interatomic distance (Å) | Clash overlap (Å) |
|------------------|------------------|--------------------------|-------------------|
| 4:S:50:PHE:HD1   | 4:S:52:VAL:HG23  | 1.79                     | 0.47              |
| 1:A:180:LYS:NZ   | 4:S:156:LEU:HD11 | 2.29                     | 0.47              |
| 1:A:213:SER:C    | 4:S:143:GLU:CD   | 2.72                     | 0.47              |
| 1:A:220:SER:CA   | 4:S:142:ILE:HG22 | 2.37                     | 0.47              |
| 1:A:291:ILE:H    | 1:A:291:ILE:CD1  | 2.28                     | 0.47              |
| 1:A:605:GLU:CD   | 1:A:632:PHE:CE2  | 2.88                     | 0.47              |
| 2:B:42:ILE:HD13  | 2:B:65:ARG:CD    | 2.39                     | 0.47              |
| 2:B:260:LEU:HA   | 2:B:291:TYR:CZ   | 2.49                     | 0.47              |
| 2:B:588:ILE:HG21 | 2:B:618:PHE:HE1  | 1.79                     | 0.47              |
| 3:M:8:THR:CA     | 3:M:13:LYS:O     | 2.62                     | 0.47              |
| 3:M:223:HIS:N    | 3:M:239:SER:O    | 2.46                     | 0.47              |
| 3:M:240:ILE:HG21 | 3:M:444:ALA:O    | 2.14                     | 0.47              |
| 3:M:252:ASP:O    | 3:M:254:PRO:HD2  | 2.14                     | 0.47              |
| 1:A:182:ILE:HG23 | 1:A:221:VAL:HG21 | 1.83                     | 0.47              |
| 1:A:588:LEU:O    | 1:A:590:TYR:N    | 2.47                     | 0.47              |
| 2:B:155:LEU:C    | 2:B:157:THR:H    | 2.17                     | 0.47              |
| 2:B:277:CYS:SG   | 2:B:292:GLU:CD   | 2.91                     | 0.47              |
| 2:B:279:LEU:HD12 | 2:B:288:TYR:HE1  | 1.79                     | 0.47              |
| 2:B:494:ALA:CB   | 2:B:529:VAL:HG22 | 2.45                     | 0.47              |
| 3:M:8:THR:O      | 3:M:75:TRP:HB2   | 2.14                     | 0.47              |
| 3:M:226:PHE:CE2  | 3:M:235:LEU:HB2  | 2.50                     | 0.47              |
| 3:M:235:LEU:CD1  | 3:M:306:LEU:HD13 | 2.44                     | 0.47              |
| 3:M:284:SER:O    | 3:M:286:SER:N    | 2.48                     | 0.47              |
| 4:S:4:ALA:CB     | 4:S:19:PHE:CD2   | 2.98                     | 0.47              |
| 4:S:69:ASN:O     | 4:S:70:ASN:HB3   | 2.14                     | 0.47              |
| 4:S:101:LEU:HD11 | 4:S:136:VAL:HG22 | 1.96                     | 0.47              |
| 1:A:270:LEU:CD1  | 1:A:274:LEU:CD2  | 2.92                     | 0.47              |
| 1:A:633:PHE:CG   | 2:B:550:VAL:O    | 2.68                     | 0.47              |
| 2:B:127:LEU:CB   | 2:B:161:LEU:CD1  | 2.63                     | 0.47              |
| 2:B:352:ASN:ND2  | 2:B:355:ASN:HB2  | 2.30                     | 0.47              |
| 2:B:534:ILE:O    | 2:B:598:LEU:CD1  | 2.56                     | 0.47              |
| 2:B:566:ALA:HB1  | 2:B:581:TYR:HA   | 1.95                     | 0.47              |
| 3:M:6:TYR:HD2    | 3:M:16:PHE:O     | 1.94                     | 0.47              |
| 3:M:218:LEU:HD12 | 3:M:218:LEU:H    | 1.80                     | 0.47              |
| 4:S:101:LEU:HG   | 4:S:135:ILE:HG21 | 1.96                     | 0.47              |
| 4:S:127:THR:HG21 | 4:S:157:ASN:OD1  | 2.15                     | 0.47              |
| 1:A:489:GLU:HB2  | 1:A:525:LEU:HD21 | 1.96                     | 0.47              |
| 1:A:586:GLU:O    | 1:A:588:LEU:N    | 2.44                     | 0.47              |
| 2:B:25:VAL:HG22  | 2:B:36:THR:N     | 2.30                     | 0.47              |
| 2:B:42:ILE:CD1   | 2:B:65:ARG:CD    | 2.81                     | 0.47              |
| 2:B:42:ILE:HG23  | 2:B:46:GLN:OE1   | 2.14                     | 0.47              |

*Continued on next page...*

*Continued from previous page...*

| Atom-1           | Atom-2           | Interatomic distance (Å) | Clash overlap (Å) |
|------------------|------------------|--------------------------|-------------------|
| 2:B:141:ALA:C    | 2:B:143:SER:H    | 2.18                     | 0.47              |
| 2:B:232:ARG:O    | 2:B:236:ILE:N    | 2.43                     | 0.47              |
| 2:B:243:TRP:HZ3  | 3:M:91:THR:CA    | 2.12                     | 0.47              |
| 2:B:274:PRO:CB   | 2:B:295:ASN:HD21 | 2.28                     | 0.47              |
| 2:B:531:ARG:HG3  | 2:B:591:MET:CE   | 2.45                     | 0.47              |
| 3:M:62:VAL:O     | 3:M:64:LYS:HG3   | 2.15                     | 0.47              |
| 3:M:273:HIS:HB3  | 3:M:276:VAL:HG23 | 1.97                     | 0.47              |
| 1:A:141:VAL:CG2  | 4:S:156:LEU:C    | 2.75                     | 0.47              |
| 1:A:156:PRO:O    | 1:A:160:ARG:CG   | 2.62                     | 0.47              |
| 1:A:178:ARG:O    | 1:A:182:ILE:HG13 | 2.15                     | 0.47              |
| 1:A:220:SER:CB   | 4:S:142:ILE:HG23 | 2.27                     | 0.47              |
| 1:A:316:LEU:HD21 | 1:A:341:ILE:HG13 | 1.95                     | 0.47              |
| 1:A:388:VAL:HG22 | 1:A:435:ILE:HD12 | 1.96                     | 0.47              |
| 1:A:463:ASP:C    | 2:B:1:MET:CG     | 2.73                     | 0.47              |
| 1:A:563:CYS:O    | 1:A:566:PHE:CE2  | 2.68                     | 0.47              |
| 1:A:609:LEU:HD12 | 1:A:625:LEU:HD12 | 1.96                     | 0.47              |
| 2:B:25:VAL:HG22  | 2:B:35:TYR:C     | 2.35                     | 0.47              |
| 2:B:37:TYR:HE2   | 2:B:46:GLN:OE1   | 1.97                     | 0.47              |
| 2:B:51:LEU:HD11  | 2:B:66:ILE:HD13  | 1.95                     | 0.47              |
| 2:B:85:ASP:C     | 2:B:89:ASN:HD22  | 2.18                     | 0.47              |
| 2:B:117:LEU:O    | 2:B:120:ILE:HB   | 2.14                     | 0.47              |
| 2:B:140:SER:CB   | 2:B:172:GLU:OE2  | 2.55                     | 0.47              |
| 2:B:216:LYS:CG   | 2:B:251:LEU:HA   | 2.45                     | 0.47              |
| 2:B:336:ASN:C    | 2:B:338:LYS:H    | 2.17                     | 0.47              |
| 2:B:421:SER:O    | 2:B:422:ALA:C    | 2.49                     | 0.47              |
| 2:B:474:VAL:C    | 2:B:476:ARG:N    | 2.66                     | 0.47              |
| 2:B:523:PHE:HD1  | 2:B:559:ASP:OD2  | 1.97                     | 0.47              |
| 2:B:534:ILE:HG12 | 2:B:595:VAL:CG2  | 2.44                     | 0.47              |
| 2:B:585:GLY:O    | 2:B:589:SER:CB   | 2.63                     | 0.47              |
| 3:M:215:TYR:CD1  | 3:M:467:TYR:C    | 2.88                     | 0.47              |
| 3:M:222:PHE:CD2  | 3:M:439:TYR:CZ   | 3.02                     | 0.47              |
| 3:M:243:ILE:H    | 3:M:474:THR:HG21 | 1.64                     | 0.47              |
| 3:M:244:VAL:O    | 3:M:299:LEU:CB   | 2.62                     | 0.47              |
| 3:M:276:VAL:CG1  | 3:M:299:LEU:HD12 | 2.45                     | 0.47              |
| 3:M:348:LYS:HA   | 3:M:406:GLY:N    | 2.30                     | 0.47              |
| 3:M:353:VAL:HG11 | 3:M:356:LEU:HB2  | 1.97                     | 0.47              |
| 3:M:362:PHE:CE1  | 3:M:374:TYR:CZ   | 3.03                     | 0.47              |
| 4:S:1:MET:H2     | 4:S:93:GLU:CD    | 2.18                     | 0.47              |
| 4:S:85:PHE:CE2   | 4:S:109:LEU:CD2  | 2.85                     | 0.47              |
| 4:S:112:CYS:SG   | 4:S:153:VAL:CG2  | 2.99                     | 0.47              |
| 1:A:67:LYS:O     | 4:S:166:LYS:HA   | 2.13                     | 0.47              |

*Continued on next page...*

*Continued from previous page...*

| Atom-1           | Atom-2           | Interatomic distance (Å) | Clash overlap (Å) |
|------------------|------------------|--------------------------|-------------------|
| 1:A:77:LEU:O     | 1:A:80:TYR:HB2   | 2.15                     | 0.47              |
| 1:A:114:PHE:CE2  | 1:A:153:ILE:HA   | 2.50                     | 0.47              |
| 1:A:220:SER:HB2  | 4:S:142:ILE:CA   | 2.43                     | 0.47              |
| 2:B:94:ASP:OD1   | 2:B:95:THR:N     | 2.47                     | 0.47              |
| 2:B:213:LEU:HD21 | 2:B:247:TYR:CG   | 2.50                     | 0.47              |
| 2:B:389:ILE:HG21 | 2:B:427:ASN:HD22 | 1.80                     | 0.47              |
| 2:B:515:PHE:HA   | 2:B:518:ILE:HG22 | 1.97                     | 0.47              |
| 3:M:72:LEU:HD11  | 3:M:101:LEU:HD22 | 1.97                     | 0.47              |
| 3:M:101:LEU:HD11 | 3:M:107:ASP:N    | 2.30                     | 0.47              |
| 1:A:114:PHE:CE1  | 1:A:153:ILE:HG23 | 2.50                     | 0.47              |
| 1:A:147:LEU:CD1  | 1:A:166:LEU:HD23 | 2.44                     | 0.47              |
| 1:A:189:PHE:HD2  | 1:A:225:LEU:CG   | 2.27                     | 0.47              |
| 1:A:530:ASN:OD1  | 1:A:577:VAL:CG2  | 2.63                     | 0.47              |
| 2:B:139:LEU:O    | 2:B:176:ALA:HB2  | 2.14                     | 0.47              |
| 2:B:143:SER:O    | 2:B:144:ASP:C    | 2.46                     | 0.47              |
| 2:B:143:SER:CA   | 2:B:179:LYS:CB   | 2.90                     | 0.47              |
| 2:B:175:LEU:CD1  | 2:B:210:CYS:CB   | 2.89                     | 0.47              |
| 2:B:219:TYR:CB   | 2:B:223:LEU:HD21 | 2.20                     | 0.47              |
| 2:B:245:GLN:CB   | 2:B:309:LEU:CD1  | 2.93                     | 0.47              |
| 2:B:267:ASP:CB   | 2:B:289:PRO:HB3  | 2.45                     | 0.47              |
| 2:B:399:LEU:O    | 2:B:401:THR:N    | 2.48                     | 0.47              |
| 3:M:224:VAL:CB   | 3:M:479:PHE:CD1  | 2.98                     | 0.47              |
| 1:A:95:MET:C     | 1:A:127:LEU:HD23 | 2.33                     | 0.47              |
| 1:A:408:ILE:HD12 | 1:A:410:TYR:HD1  | 1.77                     | 0.47              |
| 1:A:476:GLN:OE1  | 1:A:476:GLN:HA   | 2.15                     | 0.47              |
| 1:A:594:PHE:CB   | 2:B:473:ASN:HB3  | 2.22                     | 0.47              |
| 2:B:38:TYR:HB3   | 2:B:42:ILE:HD12  | 1.45                     | 0.47              |
| 2:B:174:ALA:HB1  | 2:B:211:ALA:HB1  | 1.94                     | 0.47              |
| 2:B:215:TYR:CE2  | 2:B:229:HIS:CG   | 3.02                     | 0.47              |
| 2:B:299:LEU:HD21 | 2:B:328:LEU:HD13 | 1.98                     | 0.47              |
| 2:B:553:ALA:O    | 2:B:556:LEU:HB2  | 2.15                     | 0.47              |
| 2:B:559:ASP:CG   | 2:B:582:ASP:OD2  | 2.53                     | 0.47              |
| 3:M:5:PHE:HB2    | 3:M:125:PHE:HE2  | 1.77                     | 0.47              |
| 3:M:215:TYR:CE1  | 3:M:468:LYS:CA   | 2.90                     | 0.47              |
| 3:M:270:PRO:CA   | 3:M:302:TYR:HD1  | 2.28                     | 0.47              |
| 3:M:336:ASP:CG   | 3:M:415:ILE:O    | 2.44                     | 0.47              |
| 3:M:421:GLY:O    | 3:M:423:ASN:N    | 2.48                     | 0.47              |
| 3:M:473:LYS:O    | 3:M:474:THR:HG22 | 2.15                     | 0.47              |
| 1:A:100:LEU:CD1  | 4:S:161:GLU:H    | 2.28                     | 0.46              |
| 1:A:141:VAL:HB   | 4:S:159:ALA:CB   | 2.38                     | 0.46              |
| 1:A:219:VAL:HG21 | 1:A:256:LEU:HD23 | 1.86                     | 0.46              |

*Continued on next page...*

*Continued from previous page...*

| Atom-1           | Atom-2           | Interatomic distance (Å) | Clash overlap (Å) |
|------------------|------------------|--------------------------|-------------------|
| 1:A:241:TYR:C    | 1:A:241:TYR:CD2  | 2.88                     | 0.46              |
| 1:A:335:CYS:O    | 1:A:338:PHE:HB2  | 2.15                     | 0.46              |
| 1:A:491:THR:O    | 1:A:495:ILE:HG12 | 2.15                     | 0.46              |
| 1:A:557:LYS:CG   | 2:B:606:ASP:CB   | 2.93                     | 0.46              |
| 1:A:636:TYR:HD2  | 2:B:513:TRP:HZ2  | 1.63                     | 0.46              |
| 2:B:4:SER:O      | 2:B:8:ILE:CG1    | 2.63                     | 0.46              |
| 2:B:10:SER:O     | 2:B:11:ALA:C     | 2.52                     | 0.46              |
| 2:B:196:LEU:HD13 | 2:B:215:TYR:CE2  | 2.50                     | 0.46              |
| 2:B:212:VAL:N    | 2:B:233:TYR:CZ   | 2.83                     | 0.46              |
| 2:B:336:ASN:C    | 2:B:338:LYS:N    | 2.67                     | 0.46              |
| 2:B:570:GLY:O    | 2:B:571:SER:C    | 2.51                     | 0.46              |
| 3:M:9:ASP:C      | 3:M:9:ASP:OD1    | 2.54                     | 0.46              |
| 3:M:217:ASP:CB   | 3:M:471:LYS:N    | 2.54                     | 0.46              |
| 3:M:223:HIS:CA   | 3:M:479:PHE:CG   | 2.86                     | 0.46              |
| 3:M:375:LYS:CG   | 3:M:418:GLU:OE1  | 2.63                     | 0.46              |
| 4:S:35:VAL:HG12  | 4:S:68:VAL:HG11  | 1.96                     | 0.46              |
| 4:S:53:THR:HG22  | 4:S:57:LEU:CB    | 2.26                     | 0.46              |
| 1:A:170:LEU:HB3  | 1:A:202:LYS:HG3  | 1.98                     | 0.46              |
| 1:A:226:SER:HB3  | 1:A:263:LEU:HD21 | 1.97                     | 0.46              |
| 1:A:316:LEU:CD1  | 1:A:341:ILE:HG21 | 2.42                     | 0.46              |
| 1:A:403:LEU:CD2  | 1:A:422:GLU:OE2  | 2.59                     | 0.46              |
| 1:A:636:TYR:H    | 2:B:554:LYS:CE   | 2.27                     | 0.46              |
| 2:B:97:VAL:HG12  | 2:B:101:ILE:CD1  | 2.45                     | 0.46              |
| 2:B:115:LEU:HD13 | 2:B:115:LEU:HA   | 1.83                     | 0.46              |
| 2:B:216:LYS:HB2  | 2:B:251:LEU:HB2  | 1.96                     | 0.46              |
| 2:B:261:PRO:HD2  | 2:B:293:VAL:HG23 | 1.97                     | 0.46              |
| 2:B:592:TYR:CE1  | 2:B:615:SER:CB   | 2.98                     | 0.46              |
| 3:M:6:TYR:OH     | 3:M:17:GLN:CD    | 2.41                     | 0.46              |
| 3:M:290:PHE:CE2  | 3:M:297:PHE:CE1  | 3.00                     | 0.46              |
| 3:M:325:LEU:HG   | 3:M:338:PHE:HD1  | 1.80                     | 0.46              |
| 3:M:339:GLU:CG   | 3:M:412:ARG:HD3  | 2.39                     | 0.46              |
| 4:S:17:VAL:HB    | 4:S:32:LEU:HD11  | 1.98                     | 0.46              |
| 1:A:105:VAL:N    | 4:S:167:ILE:HD12 | 1.98                     | 0.46              |
| 1:A:435:ILE:CG2  | 1:A:441:TYR:CE2  | 2.98                     | 0.46              |
| 1:A:515:CYS:O    | 1:A:519:LEU:HG   | 2.15                     | 0.46              |
| 2:B:96:LYS:O     | 2:B:99:ARG:HB3   | 2.16                     | 0.46              |
| 2:B:403:ILE:CG2  | 2:B:411:ILE:CD1  | 2.92                     | 0.46              |
| 2:B:522:GLU:C    | 2:B:524:LYS:H    | 2.18                     | 0.46              |
| 2:B:546:CYS:N    | 2:B:607:ILE:HG21 | 2.31                     | 0.46              |
| 2:B:592:TYR:O    | 2:B:595:VAL:HB   | 2.16                     | 0.46              |
| 2:B:604:GLU:HB3  | 2:B:607:ILE:HD12 | 1.97                     | 0.46              |

*Continued on next page...*

*Continued from previous page...*

| Atom-1           | Atom-2           | Interatomic distance (Å) | Clash overlap (Å) |
|------------------|------------------|--------------------------|-------------------|
| 3:M:253:ASN:O    | 3:M:254:PRO:C    | 2.53                     | 0.46              |
| 3:M:360:LEU:HD13 | 3:M:433:VAL:HG23 | 1.95                     | 0.46              |
| 1:A:251:TRP:NE1  | 4:S:104:THR:HA   | 2.29                     | 0.46              |
| 1:A:287:ALA:HB3  | 1:A:288:THR:CA   | 2.45                     | 0.46              |
| 1:A:287:ALA:CB   | 1:A:289:SER:HB3  | 2.44                     | 0.46              |
| 1:A:288:THR:HG1  | 1:A:291:ILE:CB   | 2.16                     | 0.46              |
| 1:A:469:LEU:O    | 1:A:470:GLY:C    | 2.43                     | 0.46              |
| 2:B:7:ARG:O      | 2:B:8:ILE:C      | 2.53                     | 0.46              |
| 2:B:102:HIS:HA   | 2:B:141:ALA:HB2  | 1.97                     | 0.46              |
| 2:B:307:ASN:O    | 2:B:309:LEU:N    | 2.49                     | 0.46              |
| 2:B:437:SER:HA   | 2:B:478:LEU:CG   | 2.45                     | 0.46              |
| 2:B:537:PHE:CG   | 2:B:598:LEU:HD13 | 2.36                     | 0.46              |
| 2:B:559:ASP:O    | 2:B:562:ASN:HB2  | 2.15                     | 0.46              |
| 3:M:17:GLN:N     | 3:M:118:TYR:CE1  | 2.74                     | 0.46              |
| 3:M:220:GLU:HB2  | 3:M:222:PHE:CE1  | 2.46                     | 0.46              |
| 3:M:220:GLU:OE2  | 3:M:439:TYR:CG   | 2.69                     | 0.46              |
| 3:M:449:VAL:HG12 | 3:M:452:ILE:HD12 | 1.91                     | 0.46              |
| 1:A:96:SER:H     | 1:A:127:LEU:CD2  | 1.79                     | 0.46              |
| 1:A:129:LYS:HG2  | 1:A:165:ASP:OD2  | 2.16                     | 0.46              |
| 1:A:537:THR:CB   | 1:A:584:PHE:CZ   | 2.97                     | 0.46              |
| 1:A:607:LEU:C    | 1:A:609:LEU:H    | 2.18                     | 0.46              |
| 2:B:59:VAL:O     | 2:B:63:MET:HB2   | 2.15                     | 0.46              |
| 2:B:132:SER:O    | 2:B:169:VAL:HG22 | 2.16                     | 0.46              |
| 2:B:143:SER:HB2  | 2:B:179:LYS:CD   | 2.45                     | 0.46              |
| 2:B:169:VAL:HG12 | 2:B:173:VAL:HG23 | 1.94                     | 0.46              |
| 2:B:223:LEU:HB3  | 2:B:259:TYR:CB   | 2.46                     | 0.46              |
| 2:B:355:ASN:O    | 2:B:358:MET:N    | 2.49                     | 0.46              |
| 2:B:513:TRP:H    | 2:B:551:LEU:HD11 | 1.61                     | 0.46              |
| 2:B:546:CYS:N    | 2:B:607:ILE:HD13 | 2.30                     | 0.46              |
| 3:M:217:ASP:CB   | 3:M:470:ALA:CA   | 2.89                     | 0.46              |
| 3:M:224:VAL:HG11 | 3:M:235:LEU:HD12 | 1.98                     | 0.46              |
| 3:M:240:ILE:CG2  | 3:M:444:ALA:HA   | 2.45                     | 0.46              |
| 3:M:338:PHE:CD2  | 3:M:415:ILE:HD11 | 2.50                     | 0.46              |
| 1:A:103:LYS:O    | 1:A:107:TYR:CG   | 2.61                     | 0.46              |
| 1:A:323:CYS:HB2  | 1:A:355:LEU:HD21 | 1.96                     | 0.46              |
| 1:A:374:LEU:C    | 1:A:376:GLU:OE1  | 2.54                     | 0.46              |
| 1:A:409:VAL:O    | 1:A:409:VAL:CG1  | 2.63                     | 0.46              |
| 1:A:604:LEU:HD23 | 1:A:604:LEU:C    | 2.35                     | 0.46              |
| 2:B:20:ARG:CD    | 2:B:35:TYR:OH    | 2.31                     | 0.46              |
| 2:B:59:VAL:O     | 2:B:59:VAL:HG12  | 2.16                     | 0.46              |
| 2:B:136:CYS:HB3  | 2:B:172:GLU:HG3  | 1.97                     | 0.46              |

*Continued on next page...*

*Continued from previous page...*

| Atom-1           | Atom-2           | Interatomic distance (Å) | Clash overlap (Å) |
|------------------|------------------|--------------------------|-------------------|
| 2:B:169:VAL:C    | 2:B:173:VAL:HG23 | 2.35                     | 0.46              |
| 2:B:199:LEU:O    | 2:B:201:ALA:CA   | 2.59                     | 0.46              |
| 2:B:219:TYR:HE2  | 2:B:226:LEU:H    | 1.48                     | 0.46              |
| 2:B:419:VAL:O    | 2:B:420:ALA:C    | 2.53                     | 0.46              |
| 2:B:461:HIS:CB   | 2:B:463:LEU:CD2  | 2.94                     | 0.46              |
| 2:B:477:MET:O    | 2:B:480:GLN:CB   | 2.58                     | 0.46              |
| 2:B:497:LEU:HD13 | 2:B:503:LEU:HD12 | 1.97                     | 0.46              |
| 2:B:564:LYS:O    | 2:B:574:ASN:ND2  | 2.47                     | 0.46              |
| 2:B:569:THR:HA   | 2:B:571:SER:H    | 1.80                     | 0.46              |
| 3:M:130:GLU:OE1  | 3:M:130:GLU:HA   | 2.16                     | 0.46              |
| 3:M:217:ASP:C    | 3:M:472:TYR:CE1  | 2.89                     | 0.46              |
| 1:A:95:MET:CB    | 1:A:127:LEU:HD23 | 2.46                     | 0.46              |
| 1:A:128:LEU:CD1  | 1:A:150:LEU:HG   | 2.29                     | 0.46              |
| 1:A:219:VAL:CA   | 1:A:259:LEU:CD1  | 2.93                     | 0.46              |
| 1:A:275:LEU:C    | 1:A:275:LEU:HD23 | 2.35                     | 0.46              |
| 1:A:287:ALA:N    | 1:A:288:THR:HA   | 2.31                     | 0.46              |
| 1:A:503:ASN:OD1  | 3:M:59:ASP:CG    | 2.52                     | 0.46              |
| 2:B:143:SER:CB   | 2:B:175:LEU:HB3  | 2.45                     | 0.46              |
| 2:B:177:ILE:HB   | 2:B:196:LEU:CD2  | 2.26                     | 0.46              |
| 2:B:490:ILE:CD1  | 2:B:518:ILE:HG21 | 2.45                     | 0.46              |
| 2:B:572:GLU:C    | 2:B:574:ASN:N    | 2.69                     | 0.46              |
| 3:M:235:LEU:HD11 | 3:M:306:LEU:HB2  | 1.94                     | 0.46              |
| 3:M:290:PHE:HD1  | 3:M:299:LEU:CD1  | 2.28                     | 0.46              |
| 1:A:166:LEU:HD12 | 1:A:185:LEU:HD21 | 1.95                     | 0.46              |
| 1:A:166:LEU:HB2  | 1:A:185:LEU:HD21 | 1.98                     | 0.46              |
| 1:A:320:HIS:N    | 1:A:338:PHE:HZ   | 2.14                     | 0.46              |
| 1:A:384:LEU:HD21 | 1:A:441:TYR:CD2  | 2.49                     | 0.46              |
| 2:B:56:SER:O     | 2:B:97:VAL:HG21  | 2.15                     | 0.46              |
| 2:B:106:LEU:CG   | 2:B:144:ASP:HB2  | 2.43                     | 0.46              |
| 2:B:120:ILE:HG13 | 2:B:150:LEU:CD2  | 2.44                     | 0.46              |
| 2:B:208:ILE:C    | 2:B:210:CYS:N    | 2.66                     | 0.46              |
| 2:B:215:TYR:HB3  | 2:B:226:LEU:HD13 | 1.87                     | 0.46              |
| 2:B:257:LYS:HA   | 2:B:260:LEU:HG   | 1.97                     | 0.46              |
| 2:B:389:ILE:HG22 | 2:B:393:ILE:HD11 | 1.98                     | 0.46              |
| 2:B:487:LEU:CD2  | 2:B:522:GLU:HB3  | 2.29                     | 0.46              |
| 2:B:556:LEU:HD22 | 2:B:588:ILE:CG1  | 2.07                     | 0.46              |
| 3:M:2:TYR:O      | 3:M:80:THR:C     | 2.54                     | 0.46              |
| 3:M:246:VAL:CA   | 3:M:470:ALA:HB1  | 2.45                     | 0.46              |
| 3:M:258:VAL:CG1  | 3:M:452:ILE:HG13 | 2.45                     | 0.46              |
| 3:M:435:LEU:HD12 | 3:M:435:LEU:N    | 2.31                     | 0.46              |
| 4:S:135:ILE:O    | 4:S:141:VAL:CB   | 2.62                     | 0.46              |

*Continued on next page...*

*Continued from previous page...*

| Atom-1           | Atom-2           | Interatomic distance (Å) | Clash overlap (Å) |
|------------------|------------------|--------------------------|-------------------|
| 1:A:175:PRO:CB   | 1:A:211:ASP:CG   | 2.82                     | 0.46              |
| 1:A:252:ILE:HG13 | 4:S:145:ASN:HA   | 1.67                     | 0.46              |
| 1:A:562:TRP:CE3  | 1:A:574:ILE:HD12 | 2.51                     | 0.46              |
| 1:A:633:PHE:CB   | 2:B:554:LYS:HB2  | 2.45                     | 0.46              |
| 2:B:36:THR:O     | 2:B:40:GLN:CG    | 2.64                     | 0.46              |
| 2:B:77:ILE:HG23  | 2:B:82:TYR:HE1   | 1.71                     | 0.46              |
| 2:B:267:ASP:CB   | 2:B:289:PRO:HG3  | 2.46                     | 0.46              |
| 3:M:339:GLU:CD   | 3:M:412:ARG:HD3  | 2.35                     | 0.46              |
| 3:M:356:LEU:HD23 | 3:M:358:ILE:HG13 | 1.93                     | 0.46              |
| 4:S:53:THR:HG1   | 4:S:68:VAL:C     | 1.98                     | 0.46              |
| 4:S:127:THR:CG2  | 4:S:157:ASN:OD1  | 2.64                     | 0.46              |
| 4:S:160:ALA:HB1  | 4:S:167:ILE:HG21 | 1.96                     | 0.46              |
| 1:A:67:LYS:CG    | 1:A:94:VAL:HG22  | 2.45                     | 0.46              |
| 1:A:132:LEU:HD12 | 1:A:165:ASP:CB   | 2.45                     | 0.46              |
| 2:B:14:THR:O     | 2:B:16:LYS:N     | 2.48                     | 0.46              |
| 2:B:87:VAL:HG21  | 2:B:119:SER:HA   | 1.98                     | 0.46              |
| 2:B:157:THR:C    | 2:B:159:LYS:H    | 2.18                     | 0.46              |
| 2:B:175:LEU:HD21 | 2:B:210:CYS:O    | 2.02                     | 0.46              |
| 2:B:215:TYR:O    | 2:B:219:TYR:CD1  | 2.67                     | 0.46              |
| 2:B:252:LEU:CG   | 2:B:302:PHE:CE1  | 2.94                     | 0.46              |
| 2:B:433:VAL:HG12 | 2:B:474:VAL:CG1  | 2.43                     | 0.46              |
| 2:B:493:LEU:HD21 | 2:B:511:ILE:CG1  | 2.46                     | 0.46              |
| 3:M:18:TYR:CE2   | 3:M:20:LEU:HD23  | 2.43                     | 0.46              |
| 4:S:34:GLN:CG    | 4:S:58:LEU:HD11  | 2.45                     | 0.46              |
| 4:S:51:LEU:H     | 4:S:77:TYR:HE1   | 1.64                     | 0.46              |
| 1:A:63:ASP:C     | 4:S:165:SER:HG   | 2.11                     | 0.45              |
| 1:A:121:LEU:HD13 | 1:A:155:THR:HG21 | 1.97                     | 0.45              |
| 1:A:128:LEU:CB   | 1:A:150:LEU:HD21 | 2.46                     | 0.45              |
| 1:A:132:LEU:CD2  | 1:A:169:MET:SD   | 3.04                     | 0.45              |
| 1:A:200:PHE:CE1  | 1:A:236:LEU:HG   | 2.51                     | 0.45              |
| 1:A:353:ASP:OD1  | 1:A:378:ILE:HD12 | 2.16                     | 0.45              |
| 1:A:401:VAL:HG23 | 1:A:419:ILE:HB   | 1.98                     | 0.45              |
| 1:A:401:VAL:HG12 | 1:A:402:ILE:N    | 2.30                     | 0.45              |
| 1:A:404:GLN:OE1  | 2:B:7:ARG:NH1    | 2.50                     | 0.45              |
| 2:B:143:SER:CA   | 2:B:179:LYS:CD   | 2.80                     | 0.45              |
| 2:B:178:ILE:HG23 | 2:B:218:CYS:N    | 2.30                     | 0.45              |
| 2:B:523:PHE:CD1  | 2:B:559:ASP:OD2  | 2.69                     | 0.45              |
| 3:M:67:SER:HB3   | 3:M:90:PHE:HD1   | 1.70                     | 0.45              |
| 3:M:216:VAL:O    | 3:M:216:VAL:CG2  | 2.64                     | 0.45              |
| 3:M:228:LYS:NZ   | 3:M:327:PHE:N    | 2.63                     | 0.45              |
| 3:M:319:SER:HB2  | 3:M:346:ASN:N    | 2.26                     | 0.45              |

*Continued on next page...*

*Continued from previous page...*

| Atom-1           | Atom-2           | Interatomic distance (Å) | Clash overlap (Å) |
|------------------|------------------|--------------------------|-------------------|
| 3:M:469:GLY:O    | 3:M:470:ALA:C    | 2.53                     | 0.45              |
| 4:S:50:PHE:CA    | 4:S:76:ILE:HA    | 2.46                     | 0.45              |
| 1:A:74:LEU:HD22  | 1:A:87:CYS:HB3   | 1.96                     | 0.45              |
| 1:A:95:MET:SD    | 1:A:107:TYR:CE2  | 3.09                     | 0.45              |
| 1:A:105:VAL:CG2  | 4:S:167:ILE:CG1  | 2.71                     | 0.45              |
| 1:A:171:ASN:CG   | 1:A:202:LYS:NZ   | 2.69                     | 0.45              |
| 1:A:264:SER:HB2  | 1:A:271:ARG:HG3  | 1.92                     | 0.45              |
| 1:A:533:ILE:CG1  | 1:A:562:TRP:HH2  | 2.12                     | 0.45              |
| 1:A:633:PHE:CZ   | 2:B:513:TRP:HE3  | 2.13                     | 0.45              |
| 2:B:29:LYS:HE2   | 2:B:30:LEU:CB    | 2.46                     | 0.45              |
| 2:B:106:LEU:HD22 | 2:B:144:ASP:CB   | 2.45                     | 0.45              |
| 2:B:121:ASN:N    | 2:B:153:ILE:HD13 | 2.31                     | 0.45              |
| 2:B:215:TYR:CE2  | 2:B:229:HIS:HB2  | 2.50                     | 0.45              |
| 2:B:381:PHE:O    | 2:B:383:VAL:N    | 2.49                     | 0.45              |
| 2:B:468:LEU:HD13 | 2:B:507:ALA:HB2  | 1.96                     | 0.45              |
| 2:B:478:LEU:C    | 2:B:480:GLN:N    | 2.63                     | 0.45              |
| 2:B:512:VAL:CG2  | 2:B:548:ILE:HG12 | 2.39                     | 0.45              |
| 2:B:538:SER:N    | 2:B:598:LEU:HD22 | 2.32                     | 0.45              |
| 3:M:323:MET:CG   | 3:M:342:LEU:HG   | 2.46                     | 0.45              |
| 1:A:224:GLU:O    | 1:A:227:LYS:N    | 2.46                     | 0.45              |
| 1:A:320:HIS:CB   | 1:A:352:PHE:CE2  | 2.84                     | 0.45              |
| 1:A:609:LEU:CG   | 1:A:628:VAL:CG2  | 2.92                     | 0.45              |
| 1:A:631:SER:HA   | 2:B:554:LYS:HA   | 1.98                     | 0.45              |
| 2:B:37:TYR:CZ    | 2:B:46:GLN:CD    | 2.63                     | 0.45              |
| 2:B:127:LEU:HD12 | 2:B:157:THR:CB   | 2.43                     | 0.45              |
| 2:B:133:GLU:O    | 2:B:168:MET:SD   | 2.74                     | 0.45              |
| 2:B:193:LEU:HB3  | 2:B:225:LEU:HD11 | 0.97                     | 0.45              |
| 2:B:381:PHE:HD2  | 2:B:395:LYS:NZ   | 2.13                     | 0.45              |
| 2:B:418:TYR:CG   | 2:B:419:VAL:N    | 2.83                     | 0.45              |
| 3:M:1:MET:C      | 3:M:81:SER:CB    | 2.84                     | 0.45              |
| 3:M:111:ILE:HA   | 3:M:114:ILE:HD12 | 1.98                     | 0.45              |
| 3:M:222:PHE:HB3  | 3:M:479:PHE:CE1  | 2.52                     | 0.45              |
| 3:M:347:PHE:CZ   | 3:M:439:TYR:HD2  | 2.33                     | 0.45              |
| 4:S:135:ILE:HG23 | 4:S:141:VAL:HG11 | 1.93                     | 0.45              |
| 4:S:151:ALA:O    | 4:S:154:ASP:HB2  | 2.16                     | 0.45              |
| 1:A:102:GLN:HA   | 4:S:167:ILE:N    | 2.32                     | 0.45              |
| 1:A:102:GLN:C    | 4:S:163:THR:HB   | 2.13                     | 0.45              |
| 1:A:287:ALA:H    | 1:A:288:THR:HA   | 1.81                     | 0.45              |
| 1:A:586:GLU:CA   | 1:A:604:LEU:CD1  | 2.94                     | 0.45              |
| 2:B:274:PRO:CD   | 2:B:295:ASN:CG   | 2.78                     | 0.45              |
| 2:B:278:PRO:CB   | 2:B:289:PRO:O    | 2.64                     | 0.45              |

*Continued on next page...*



*Continued from previous page...*

| Atom-1           | Atom-2           | Interatomic distance (Å) | Clash overlap (Å) |
|------------------|------------------|--------------------------|-------------------|
| 2:B:325:LEU:HD22 | 2:B:339:PHE:CE2  | 2.52                     | 0.45              |
| 2:B:588:ILE:O    | 2:B:591:MET:HB2  | 2.15                     | 0.45              |
| 3:M:128:CYS:O    | 3:M:131:ALA:HB3  | 2.16                     | 0.45              |
| 3:M:378:ILE:HB   | 3:M:413:GLY:CA   | 2.44                     | 0.45              |
| 4:S:27:LYS:O     | 4:S:31:LEU:HG    | 2.17                     | 0.45              |
| 4:S:135:ILE:O    | 4:S:140:MET:O    | 2.34                     | 0.45              |
| 1:A:88:ASN:OD1   | 1:A:120:ILE:HG21 | 2.16                     | 0.45              |
| 1:A:129:LYS:CG   | 1:A:161:ASP:HB3  | 2.47                     | 0.45              |
| 1:A:215:VAL:O    | 1:A:219:VAL:CG2  | 2.61                     | 0.45              |
| 1:A:225:LEU:CG   | 1:A:233:PHE:CZ   | 2.99                     | 0.45              |
| 1:A:482:ILE:CG1  | 1:A:517:TRP:CZ3  | 2.97                     | 0.45              |
| 1:A:555:LEU:HD12 | 1:A:585:PHE:CZ   | 2.52                     | 0.45              |
| 2:B:63:MET:HG2   | 2:B:100:LEU:CB   | 2.46                     | 0.45              |
| 2:B:334:MET:HE1  | 2:B:339:PHE:CE1  | 2.50                     | 0.45              |
| 3:M:215:TYR:CB   | 3:M:468:LYS:CA   | 2.92                     | 0.45              |
| 3:M:224:VAL:CG1  | 3:M:235:LEU:HG   | 2.46                     | 0.45              |
| 3:M:290:PHE:CD1  | 3:M:297:PHE:CD1  | 2.90                     | 0.45              |
| 3:M:319:SER:O    | 3:M:320:ILE:HD13 | 2.16                     | 0.45              |
| 4:S:53:THR:HG22  | 4:S:54:PRO:O     | 2.17                     | 0.45              |
| 4:S:70:ASN:HB3   | 4:S:73:ILE:HB    | 1.96                     | 0.45              |
| 4:S:129:GLU:O    | 4:S:132:LEU:HB3  | 2.17                     | 0.45              |
| 1:A:71:VAL:HG11  | 1:A:105:VAL:C    | 2.37                     | 0.45              |
| 1:A:141:VAL:HB   | 4:S:159:ALA:HB2  | 1.97                     | 0.45              |
| 1:A:150:LEU:HD22 | 1:A:162:ILE:CD1  | 2.46                     | 0.45              |
| 1:A:179:LYS:HD2  | 4:S:143:GLU:HB2  | 1.89                     | 0.45              |
| 1:A:232:PRO:O    | 1:A:235:GLN:HB2  | 2.16                     | 0.45              |
| 1:A:433:ILE:HD11 | 1:A:473:ILE:CG1  | 2.47                     | 0.45              |
| 1:A:617:ASP:OD1  | 1:A:618:THR:N    | 2.45                     | 0.45              |
| 2:B:47:LEU:HD21  | 2:B:66:ILE:N     | 2.31                     | 0.45              |
| 2:B:97:VAL:HG12  | 2:B:101:ILE:HD12 | 1.98                     | 0.45              |
| 2:B:196:LEU:O    | 2:B:197:LYS:O    | 2.35                     | 0.45              |
| 2:B:241:ASP:HB2  | 3:M:274:ASP:OD1  | 2.16                     | 0.45              |
| 2:B:279:LEU:CD1  | 2:B:288:TYR:CE1  | 2.99                     | 0.45              |
| 2:B:394:TRP:CE3  | 2:B:397:GLN:CD   | 2.89                     | 0.45              |
| 2:B:416:LYS:HE3  | 2:B:453:TRP:CZ3  | 2.52                     | 0.45              |
| 2:B:463:LEU:HD13 | 2:B:467:VAL:HG11 | 1.99                     | 0.45              |
| 2:B:511:ILE:O    | 2:B:515:PHE:CD1  | 2.66                     | 0.45              |
| 2:B:577:ASN:O    | 2:B:578:PRO:C    | 2.39                     | 0.45              |
| 3:M:8:THR:H      | 3:M:75:TRP:C     | 2.17                     | 0.45              |
| 3:M:222:PHE:CE2  | 3:M:240:ILE:HD13 | 2.52                     | 0.45              |
| 3:M:242:GLY:O    | 3:M:302:TYR:N    | 2.50                     | 0.45              |

*Continued on next page...*

*Continued from previous page...*

| Atom-1           | Atom-2           | Interatomic distance (Å) | Clash overlap (Å) |
|------------------|------------------|--------------------------|-------------------|
| 3:M:246:VAL:CA   | 3:M:470:ALA:CB   | 2.80                     | 0.45              |
| 4:S:14:PRO:CB    | 4:S:36:TYR:HE1   | 2.25                     | 0.45              |
| 4:S:47:GLN:HG2   | 4:S:84:TYR:HE2   | 1.81                     | 0.45              |
| 1:A:135:ASP:O    | 1:A:139:ASP:HB3  | 2.16                     | 0.45              |
| 1:A:170:LEU:HD13 | 1:A:170:LEU:HA   | 1.82                     | 0.45              |
| 1:A:395:PHE:CD1  | 1:A:428:MET:HG3  | 2.51                     | 0.45              |
| 1:A:625:LEU:C    | 2:B:617:LEU:HD11 | 2.33                     | 0.45              |
| 1:A:631:SER:HB2  | 2:B:557:SER:HB3  | 1.88                     | 0.45              |
| 2:B:79:VAL:HG21  | 2:B:108:PHE:CE1  | 2.39                     | 0.45              |
| 2:B:117:LEU:CD2  | 2:B:149:SER:CB   | 2.85                     | 0.45              |
| 2:B:136:CYS:SG   | 2:B:168:MET:CB   | 3.05                     | 0.45              |
| 2:B:155:LEU:HD21 | 2:B:191:GLU:HB2  | 1.97                     | 0.45              |
| 2:B:279:LEU:O    | 2:B:280:PRO:C    | 2.52                     | 0.45              |
| 2:B:467:VAL:HG12 | 2:B:471:TYR:CD1  | 2.51                     | 0.45              |
| 2:B:498:THR:HG22 | 2:B:532:ARG:HB3  | 1.98                     | 0.45              |
| 3:M:222:PHE:CD2  | 3:M:439:TYR:OH   | 2.70                     | 0.45              |
| 1:A:464:ILE:O    | 1:A:464:ILE:HG12 | 2.17                     | 0.45              |
| 1:A:481:MET:O    | 1:A:482:ILE:C    | 2.53                     | 0.45              |
| 1:A:600:SER:O    | 1:A:602:GLU:N    | 2.50                     | 0.45              |
| 2:B:74:ASP:O     | 2:B:77:ILE:HB    | 2.17                     | 0.45              |
| 2:B:106:LEU:CD2  | 2:B:144:ASP:HB3  | 2.42                     | 0.45              |
| 2:B:196:LEU:CA   | 2:B:229:HIS:CE1  | 2.99                     | 0.45              |
| 2:B:257:LYS:HA   | 2:B:260:LEU:HD11 | 1.99                     | 0.45              |
| 2:B:259:TYR:O    | 2:B:260:LEU:HB2  | 2.16                     | 0.45              |
| 2:B:266:VAL:HG13 | 2:B:291:TYR:N    | 2.24                     | 0.45              |
| 2:B:292:GLU:HG3  | 2:B:295:ASN:O    | 2.17                     | 0.45              |
| 2:B:387:ASP:CB   | 2:B:388:PRO:HD2  | 2.45                     | 0.45              |
| 2:B:390:VAL:CG1  | 2:B:394:TRP:NE1  | 2.80                     | 0.45              |
| 2:B:461:HIS:C    | 2:B:463:LEU:N    | 2.63                     | 0.45              |
| 2:B:544:THR:HG22 | 2:B:548:ILE:HD11 | 1.99                     | 0.45              |
| 3:M:245:ASP:OD1  | 3:M:297:PHE:O    | 2.35                     | 0.45              |
| 3:M:331:LEU:HD12 | 3:M:331:LEU:C    | 2.36                     | 0.45              |
| 3:M:376:ILE:HG22 | 3:M:379:LEU:HD11 | 1.97                     | 0.45              |
| 4:S:118:GLU:O    | 4:S:122:ILE:HG13 | 2.16                     | 0.45              |
| 1:A:63:ASP:OD1   | 1:A:64:LEU:N     | 2.50                     | 0.45              |
| 1:A:282:MET:HE3  | 1:A:294:SER:CB   | 2.46                     | 0.45              |
| 2:B:139:LEU:CD2  | 2:B:173:VAL:CG1  | 2.95                     | 0.45              |
| 2:B:425:PRO:HB2  | 2:B:428:VAL:HG23 | 1.97                     | 0.45              |
| 2:B:513:TRP:HE1  | 2:B:517:GLU:CG   | 2.30                     | 0.45              |
| 2:B:534:ILE:HD12 | 2:B:591:MET:HA   | 1.71                     | 0.45              |
| 3:M:215:TYR:HB2  | 3:M:467:TYR:CB   | 2.47                     | 0.45              |

*Continued on next page...*

*Continued from previous page...*

| Atom-1           | Atom-2           | Interatomic distance (Å) | Clash overlap (Å) |
|------------------|------------------|--------------------------|-------------------|
| 3:M:344:ILE:O    | 3:M:406:GLY:HA2  | 2.17                     | 0.45              |
| 4:S:55:PRO:HB3   | 4:S:71:GLU:CA    | 2.46                     | 0.45              |
| 4:S:85:PHE:HE2   | 4:S:109:LEU:HD22 | 1.81                     | 0.45              |
| 4:S:93:GLU:HB3   | 4:S:98:ILE:HD11  | 1.98                     | 0.45              |
| 1:A:67:LYS:CA    | 4:S:166:LYS:HA   | 2.45                     | 0.45              |
| 1:A:145:ILE:HD11 | 4:S:156:LEU:HD22 | 1.93                     | 0.45              |
| 1:A:211:ASP:OD2  | 4:S:148:ARG:CZ   | 2.57                     | 0.45              |
| 1:A:298:ILE:HG21 | 1:A:312:ALA:HB2  | 1.99                     | 0.45              |
| 1:A:300:LYS:O    | 1:A:301:GLY:C    | 2.55                     | 0.45              |
| 1:A:566:PHE:CE1  | 1:A:570:LYS:HB3  | 2.52                     | 0.45              |
| 2:B:132:SER:CB   | 2:B:169:VAL:HG23 | 2.45                     | 0.45              |
| 2:B:141:ALA:HB1  | 2:B:145:MET:HE1  | 1.98                     | 0.45              |
| 2:B:281:ASP:OD1  | 2:B:287:GLU:CD   | 2.55                     | 0.45              |
| 2:B:306:LEU:HD22 | 2:B:321:CYS:CA   | 2.45                     | 0.45              |
| 2:B:314:ASN:O    | 2:B:317:VAL:HB   | 2.17                     | 0.45              |
| 3:M:52:ASP:CA    | 3:M:67:SER:HA    | 2.46                     | 0.45              |
| 3:M:347:PHE:CZ   | 3:M:352:GLN:O    | 2.70                     | 0.45              |
| 3:M:430:LEU:HD23 | 3:M:483:LEU:HD13 | 1.98                     | 0.45              |
| 1:A:150:LEU:HD22 | 1:A:162:ILE:HD11 | 1.99                     | 0.44              |
| 1:A:249:ASN:OD1  | 1:A:251:TRP:N    | 2.45                     | 0.44              |
| 1:A:292:TYR:O    | 1:A:292:TYR:HD1  | 1.96                     | 0.44              |
| 1:A:388:VAL:HG22 | 1:A:435:ILE:CD1  | 2.47                     | 0.44              |
| 1:A:396:VAL:O    | 1:A:396:VAL:CG1  | 2.65                     | 0.44              |
| 1:A:453:VAL:O    | 1:A:457:LEU:HG   | 2.16                     | 0.44              |
| 1:A:464:ILE:O    | 1:A:464:ILE:HG23 | 2.17                     | 0.44              |
| 1:A:594:PHE:O    | 1:A:598:GLU:HG2  | 2.17                     | 0.44              |
| 2:B:208:ILE:CB   | 2:B:236:ILE:HG21 | 2.46                     | 0.44              |
| 2:B:279:LEU:CD1  | 2:B:288:TYR:CD1  | 3.00                     | 0.44              |
| 2:B:419:VAL:HG11 | 2:B:457:HIS:NE2  | 2.31                     | 0.44              |
| 3:M:218:LEU:HD12 | 3:M:472:TYR:OH   | 2.16                     | 0.44              |
| 3:M:220:GLU:HG3  | 3:M:439:TYR:CG   | 2.51                     | 0.44              |
| 3:M:224:VAL:CB   | 3:M:226:PHE:CE1  | 2.99                     | 0.44              |
| 3:M:253:ASN:OD1  | 3:M:292:PRO:HD2  | 2.16                     | 0.44              |
| 4:S:15:ARG:NE    | 4:S:122:ILE:HD11 | 2.29                     | 0.44              |
| 1:A:100:LEU:HB3  | 1:A:142:LYS:CG   | 2.47                     | 0.44              |
| 1:A:103:LYS:O    | 1:A:104:ARG:O    | 2.35                     | 0.44              |
| 1:A:141:VAL:HG13 | 4:S:156:LEU:HA   | 0.85                     | 0.44              |
| 1:A:213:SER:O    | 4:S:143:GLU:CB   | 2.63                     | 0.44              |
| 1:A:240:LEU:C    | 1:A:242:GLU:O    | 2.56                     | 0.44              |
| 1:A:281:LEU:O    | 1:A:282:MET:C    | 2.36                     | 0.44              |
| 1:A:326:GLN:HG2  | 1:A:331:ARG:NH2  | 2.32                     | 0.44              |

*Continued on next page...*

*Continued from previous page...*

| Atom-1           | Atom-2           | Interatomic distance (Å) | Clash overlap (Å) |
|------------------|------------------|--------------------------|-------------------|
| 1:A:609:LEU:CG   | 1:A:628:VAL:HG11 | 2.48                     | 0.44              |
| 1:A:638:LEU:HD13 | 2:B:519:ALA:HB2  | 1.37                     | 0.44              |
| 2:B:162:VAL:HG13 | 2:B:198:GLU:HB3  | 1.98                     | 0.44              |
| 2:B:201:ALA:HA   | 2:B:232:ARG:HG2  | 1.99                     | 0.44              |
| 2:B:374:PHE:CZ   | 2:B:381:PHE:HD1  | 2.26                     | 0.44              |
| 2:B:436:LEU:HB3  | 2:B:450:VAL:CG1  | 2.47                     | 0.44              |
| 2:B:526:CYS:HB2  | 2:B:555:LEU:HD11 | 1.98                     | 0.44              |
| 2:B:592:TYR:CE1  | 2:B:615:SER:HB3  | 2.53                     | 0.44              |
| 2:B:592:TYR:HE1  | 2:B:615:SER:HB3  | 1.82                     | 0.44              |
| 3:M:18:TYR:HD1   | 3:M:122:SER:CB   | 2.16                     | 0.44              |
| 3:M:56:VAL:O     | 3:M:57:GLY:O     | 2.34                     | 0.44              |
| 3:M:220:GLU:OE1  | 3:M:222:PHE:CZ   | 2.71                     | 0.44              |
| 3:M:347:PHE:CE1  | 3:M:350:VAL:HG11 | 2.52                     | 0.44              |
| 3:M:380:ARG:HG2  | 3:M:410:VAL:HB   | 1.40                     | 0.44              |
| 4:S:17:VAL:HG11  | 4:S:19:PHE:CE1   | 2.51                     | 0.44              |
| 4:S:51:LEU:HD12  | 4:S:77:TYR:CZ    | 2.52                     | 0.44              |
| 4:S:107:GLU:HG3  | 4:S:146:VAL:HG11 | 2.00                     | 0.44              |
| 1:A:114:PHE:HZ   | 1:A:154:ILE:HG12 | 1.82                     | 0.44              |
| 1:A:481:MET:O    | 1:A:522:PHE:HZ   | 2.00                     | 0.44              |
| 1:A:581:LEU:HG   | 1:A:585:PHE:CE2  | 2.52                     | 0.44              |
| 1:A:636:TYR:CD2  | 2:B:513:TRP:HZ2  | 2.35                     | 0.44              |
| 2:B:17:VAL:O     | 2:B:18:ILE:C     | 2.54                     | 0.44              |
| 2:B:42:ILE:HG12  | 2:B:65:ARG:CD    | 2.35                     | 0.44              |
| 2:B:135:ARG:O    | 2:B:161:LEU:CD2  | 2.66                     | 0.44              |
| 2:B:344:VAL:CG2  | 2:B:381:PHE:CZ   | 2.98                     | 0.44              |
| 2:B:418:TYR:O    | 2:B:418:TYR:HD1  | 1.99                     | 0.44              |
| 2:B:556:LEU:CD2  | 2:B:588:ILE:HD11 | 2.46                     | 0.44              |
| 2:B:559:ASP:CA   | 2:B:562:ASN:HB2  | 2.36                     | 0.44              |
| 3:M:212:ASN:CB   | 3:M:250:LEU:HA   | 2.40                     | 0.44              |
| 3:M:217:ASP:N    | 3:M:472:TYR:CE1  | 2.86                     | 0.44              |
| 4:S:102:ILE:O    | 4:S:105:PHE:HB3  | 2.17                     | 0.44              |
| 1:A:171:ASN:CG   | 1:A:202:LYS:HZ1  | 2.18                     | 0.44              |
| 2:B:81:LEU:O     | 2:B:85:ASP:N     | 2.37                     | 0.44              |
| 2:B:109:ALA:O    | 2:B:110:GLU:O    | 2.35                     | 0.44              |
| 2:B:120:ILE:O    | 2:B:153:ILE:HG21 | 2.18                     | 0.44              |
| 2:B:197:LYS:HG2  | 2:B:198:GLU:N    | 2.32                     | 0.44              |
| 2:B:430:ILE:HG23 | 2:B:470:ALA:HB1  | 1.97                     | 0.44              |
| 2:B:502:SER:O    | 2:B:503:LEU:O    | 2.35                     | 0.44              |
| 2:B:520:SER:HA   | 2:B:523:PHE:CD2  | 2.53                     | 0.44              |
| 3:M:74:TYR:HD1   | 3:M:76:CYS:SG    | 2.40                     | 0.44              |
| 3:M:222:PHE:CE1  | 3:M:439:TYR:CD1  | 3.05                     | 0.44              |

*Continued on next page...*

*Continued from previous page...*

| Atom-1           | Atom-2           | Interatomic distance (Å) | Clash overlap (Å) |
|------------------|------------------|--------------------------|-------------------|
| 3:M:228:LYS:HZ1  | 3:M:326:HIS:HA   | 1.81                     | 0.44              |
| 3:M:269:ILE:N    | 3:M:302:TYR:CE1  | 2.86                     | 0.44              |
| 3:M:340:LEU:HG   | 3:M:342:LEU:CD1  | 2.48                     | 0.44              |
| 3:M:424:PHE:HZ   | 3:M:428:VAL:HG23 | 1.82                     | 0.44              |
| 4:S:51:LEU:N     | 4:S:75:ILE:O     | 2.50                     | 0.44              |
| 4:S:80:TYR:CB    | 4:S:106:VAL:HG11 | 2.47                     | 0.44              |
| 1:A:114:PHE:CD1  | 1:A:114:PHE:C    | 2.91                     | 0.44              |
| 1:A:219:VAL:O    | 4:S:140:MET:HE1  | 2.18                     | 0.44              |
| 1:A:365:VAL:O    | 1:A:366:SER:C    | 2.46                     | 0.44              |
| 2:B:63:MET:N     | 2:B:66:ILE:HD12  | 2.32                     | 0.44              |
| 2:B:116:THR:O    | 2:B:150:LEU:HD22 | 2.17                     | 0.44              |
| 2:B:195:ILE:HG22 | 2:B:196:LEU:N    | 2.31                     | 0.44              |
| 2:B:382:TYR:HE1  | 2:B:399:LEU:HD21 | 1.83                     | 0.44              |
| 2:B:556:LEU:O    | 2:B:563:PHE:HD1  | 2.01                     | 0.44              |
| 2:B:589:SER:C    | 2:B:591:MET:H    | 2.20                     | 0.44              |
| 3:M:258:VAL:CB   | 3:M:452:ILE:HG13 | 2.48                     | 0.44              |
| 1:A:237:SER:HB2  | 1:A:270:LEU:HD22 | 2.00                     | 0.44              |
| 1:A:392:MET:HE3  | 1:A:428:MET:CE   | 2.46                     | 0.44              |
| 1:A:396:VAL:C    | 1:A:397:ASP:OD1  | 2.56                     | 0.44              |
| 1:A:438:ALA:O    | 1:A:441:TYR:HD1  | 1.97                     | 0.44              |
| 1:A:603:VAL:O    | 1:A:606:PHE:CB   | 2.62                     | 0.44              |
| 2:B:42:ILE:HG22  | 2:B:43:ASN:O     | 2.17                     | 0.44              |
| 2:B:47:LEU:O     | 2:B:50:LEU:HB3   | 2.18                     | 0.44              |
| 2:B:234:CYS:HB2  | 2:B:301:LEU:HB3  | 1.99                     | 0.44              |
| 2:B:281:ASP:C    | 2:B:283:TYR:H    | 2.20                     | 0.44              |
| 2:B:493:LEU:CD2  | 2:B:511:ILE:HA   | 2.48                     | 0.44              |
| 3:M:223:HIS:CD2  | 3:M:478:ASN:HB3  | 2.50                     | 0.44              |
| 3:M:437:TYR:CG   | 3:M:439:TYR:OH   | 2.70                     | 0.44              |
| 4:S:34:GLN:HB3   | 4:S:58:LEU:CD1   | 2.48                     | 0.44              |
| 1:A:132:LEU:HD13 | 1:A:165:ASP:HB2  | 1.95                     | 0.44              |
| 1:A:179:LYS:NZ   | 4:S:149:ILE:CG1  | 2.77                     | 0.44              |
| 2:B:140:SER:OG   | 2:B:175:LEU:CD1  | 2.66                     | 0.44              |
| 2:B:212:VAL:CG2  | 2:B:248:LEU:HD23 | 2.42                     | 0.44              |
| 2:B:212:VAL:HG22 | 2:B:248:LEU:HD23 | 1.93                     | 0.44              |
| 2:B:315:PRO:O    | 2:B:318:ILE:HB   | 2.17                     | 0.44              |
| 2:B:483:PRO:O    | 2:B:486:HIS:HB3  | 2.17                     | 0.44              |
| 2:B:556:LEU:CB   | 2:B:588:ILE:CD1  | 2.85                     | 0.44              |
| 3:M:258:VAL:CG2  | 3:M:452:ILE:HG23 | 2.47                     | 0.44              |
| 3:M:290:PHE:CD2  | 3:M:297:PHE:CZ   | 3.06                     | 0.44              |
| 3:M:372:ILE:CD1  | 3:M:428:VAL:HG13 | 2.48                     | 0.44              |
| 3:M:433:VAL:CG1  | 3:M:433:VAL:O    | 2.66                     | 0.44              |

*Continued on next page...*

*Continued from previous page...*

| Atom-1           | Atom-2           | Interatomic distance (Å) | Clash overlap (Å) |
|------------------|------------------|--------------------------|-------------------|
| 4:S:3:HIS:O      | 4:S:19:PHE:CA    | 2.62                     | 0.44              |
| 4:S:80:TYR:CB    | 4:S:106:VAL:CG1  | 2.96                     | 0.44              |
| 4:S:148:ARG:O    | 4:S:151:ALA:N    | 2.51                     | 0.44              |
| 1:A:200:PHE:O    | 1:A:203:PHE:HB2  | 2.18                     | 0.44              |
| 1:A:392:MET:CE   | 1:A:428:MET:CE   | 2.96                     | 0.44              |
| 2:B:158:VAL:HG21 | 2:B:177:ILE:CG1  | 2.47                     | 0.44              |
| 2:B:230:PHE:CD2  | 2:B:298:ASP:CA   | 3.01                     | 0.44              |
| 2:B:305:SER:O    | 2:B:309:LEU:HD23 | 2.17                     | 0.44              |
| 2:B:498:THR:CG2  | 2:B:532:ARG:HB2  | 2.47                     | 0.44              |
| 2:B:537:PHE:O    | 2:B:539:ASN:N    | 2.50                     | 0.44              |
| 3:M:219:LEU:H    | 3:M:472:TYR:CB   | 2.31                     | 0.44              |
| 3:M:220:GLU:OE2  | 3:M:439:TYR:HB2  | 2.18                     | 0.44              |
| 3:M:220:GLU:OE1  | 3:M:222:PHE:CE1  | 2.70                     | 0.44              |
| 3:M:253:ASN:OD1  | 3:M:292:PRO:CD   | 2.65                     | 0.44              |
| 3:M:347:PHE:CE2  | 3:M:352:GLN:O    | 2.70                     | 0.44              |
| 4:S:39:ILE:CG1   | 4:S:77:TYR:CD2   | 3.01                     | 0.44              |
| 4:S:87:PHE:CD1   | 4:S:102:ILE:CG1  | 2.89                     | 0.44              |
| 1:A:128:LEU:HD22 | 1:A:146:ALA:HB1  | 1.99                     | 0.44              |
| 1:A:139:ASP:CG   | 1:A:177:ILE:CD1  | 2.86                     | 0.44              |
| 1:A:213:SER:CA   | 4:S:143:GLU:OE1  | 2.66                     | 0.44              |
| 1:A:275:LEU:CD1  | 1:A:308:ASP:CB   | 2.95                     | 0.44              |
| 1:A:323:CYS:HB3  | 1:A:355:LEU:HD21 | 1.97                     | 0.44              |
| 1:A:399:ASP:OD1  | 1:A:420:ILE:CG2  | 2.66                     | 0.44              |
| 1:A:581:LEU:HG   | 1:A:607:LEU:CD1  | 2.48                     | 0.44              |
| 1:A:594:PHE:CD2  | 2:B:474:VAL:HG23 | 2.47                     | 0.44              |
| 2:B:162:VAL:HG11 | 2:B:195:ILE:O    | 2.18                     | 0.44              |
| 2:B:390:VAL:HG12 | 2:B:394:TRP:NE1  | 2.32                     | 0.44              |
| 2:B:440:GLY:C    | 2:B:442:LEU:H    | 2.22                     | 0.44              |
| 2:B:490:ILE:HG23 | 2:B:515:PHE:CZ   | 2.51                     | 0.44              |
| 3:M:3:LEU:O      | 3:M:20:LEU:HD12  | 2.18                     | 0.44              |
| 3:M:7:ILE:HG21   | 3:M:114:ILE:HD13 | 2.00                     | 0.44              |
| 3:M:219:LEU:CG   | 3:M:440:ILE:HG12 | 2.45                     | 0.44              |
| 3:M:223:HIS:CA   | 3:M:479:PHE:CZ   | 2.98                     | 0.44              |
| 3:M:319:SER:HB3  | 3:M:346:ASN:CG   | 2.37                     | 0.44              |
| 3:M:323:MET:HE3  | 3:M:342:LEU:CD2  | 2.35                     | 0.44              |
| 4:S:48:SER:CB    | 4:S:78:LYS:N     | 2.76                     | 0.44              |
| 4:S:50:PHE:CB    | 4:S:76:ILE:CD1   | 2.93                     | 0.44              |
| 4:S:75:ILE:HB    | 4:S:77:TYR:CE1   | 2.52                     | 0.44              |
| 1:A:114:PHE:CZ   | 1:A:154:ILE:HG12 | 2.53                     | 0.43              |
| 1:A:178:ARG:CB   | 1:A:214:VAL:CG1  | 2.95                     | 0.43              |
| 1:A:317:GLU:HG2  | 1:A:351:ARG:HH12 | 1.83                     | 0.43              |

*Continued on next page...*

*Continued from previous page...*

| Atom-1           | Atom-2           | Interatomic distance (Å) | Clash overlap (Å) |
|------------------|------------------|--------------------------|-------------------|
| 1:A:420:ILE:HG22 | 1:A:421:PRO:O    | 2.18                     | 0.43              |
| 1:A:429:VAL:HG13 | 1:A:457:LEU:HD13 | 1.99                     | 0.43              |
| 1:A:509:PRO:HA   | 1:A:547:VAL:HG21 | 1.98                     | 0.43              |
| 2:B:127:LEU:HD22 | 2:B:157:THR:CG2  | 2.48                     | 0.43              |
| 2:B:197:LYS:H    | 2:B:229:HIS:CE1  | 2.33                     | 0.43              |
| 2:B:227:HIS:O    | 2:B:229:HIS:CA   | 2.58                     | 0.43              |
| 2:B:467:VAL:HG12 | 2:B:471:TYR:HD1  | 1.81                     | 0.43              |
| 2:B:537:PHE:CZ   | 2:B:545:ARG:HD3  | 2.52                     | 0.43              |
| 2:B:589:SER:HA   | 2:B:592:TYR:CD2  | 2.45                     | 0.43              |
| 3:M:380:ARG:HH11 | 3:M:412:ARG:NH1  | 2.16                     | 0.43              |
| 4:S:6:LEU:HB3    | 4:S:86:THR:HB    | 1.99                     | 0.43              |
| 4:S:127:THR:HG22 | 4:S:153:VAL:HG13 | 2.00                     | 0.43              |
| 1:A:150:LEU:HD13 | 1:A:162:ILE:HG23 | 2.00                     | 0.43              |
| 1:A:179:LYS:HG3  | 4:S:143:GLU:HG3  | 1.50                     | 0.43              |
| 1:A:249:ASN:HB3  | 1:A:252:ILE:HD12 | 2.00                     | 0.43              |
| 1:A:486:SER:O    | 1:A:487:MET:HB2  | 2.18                     | 0.43              |
| 1:A:563:CYS:O    | 1:A:566:PHE:CD2  | 2.71                     | 0.43              |
| 2:B:171:GLY:H    | 2:B:207:VAL:HG13 | 1.66                     | 0.43              |
| 2:B:208:ILE:O    | 2:B:210:CYS:N    | 2.51                     | 0.43              |
| 2:B:340:ILE:CG2  | 2:B:373:LEU:HG   | 2.48                     | 0.43              |
| 2:B:343:LEU:O    | 2:B:359:LEU:HD12 | 2.17                     | 0.43              |
| 2:B:398:ILE:C    | 2:B:400:SER:N    | 2.69                     | 0.43              |
| 2:B:483:PRO:CB   | 2:B:521:ILE:CG2  | 2.65                     | 0.43              |
| 3:M:100:LEU:HD22 | 3:M:100:LEU:C    | 2.36                     | 0.43              |
| 3:M:214:LEU:N    | 3:M:467:TYR:CB   | 2.81                     | 0.43              |
| 3:M:319:SER:O    | 3:M:320:ILE:HG12 | 2.18                     | 0.43              |
| 3:M:372:ILE:HD12 | 3:M:428:VAL:CG2  | 2.48                     | 0.43              |
| 3:M:376:ILE:CD1  | 3:M:415:ILE:HG23 | 2.48                     | 0.43              |
| 3:M:450:GLU:OE1  | 3:M:450:GLU:HA   | 2.18                     | 0.43              |
| 4:S:15:ARG:HE    | 4:S:118:GLU:HB2  | 1.84                     | 0.43              |
| 4:S:55:PRO:O     | 4:S:57:LEU:N     | 2.51                     | 0.43              |
| 1:A:182:ILE:HG23 | 1:A:221:VAL:CG2  | 2.39                     | 0.43              |
| 1:A:264:SER:HB2  | 1:A:271:ARG:NE   | 2.30                     | 0.43              |
| 1:A:320:HIS:HA   | 1:A:338:PHE:HZ   | 1.82                     | 0.43              |
| 1:A:548:GLN:NE2  | 1:A:588:LEU:HD11 | 2.32                     | 0.43              |
| 1:A:582:ILE:HG23 | 1:A:604:LEU:HG   | 2.00                     | 0.43              |
| 1:A:621:LEU:O    | 1:A:621:LEU:HD13 | 2.18                     | 0.43              |
| 1:A:634:ASN:HA   | 2:B:516:GLY:CA   | 2.48                     | 0.43              |
| 2:B:14:THR:C     | 2:B:16:LYS:N     | 2.71                     | 0.43              |
| 2:B:237:ILE:HB   | 2:B:248:LEU:HD13 | 2.00                     | 0.43              |
| 2:B:359:LEU:HD13 | 2:B:359:LEU:HA   | 1.88                     | 0.43              |

*Continued on next page...*

*Continued from previous page...*

| Atom-1           | Atom-2           | Interatomic distance (Å) | Clash overlap (Å) |
|------------------|------------------|--------------------------|-------------------|
| 2:B:580:TYR:C    | 2:B:582:ASP:N    | 2.72                     | 0.43              |
| 2:B:589:SER:O    | 2:B:592:TYR:N    | 2.51                     | 0.43              |
| 2:B:591:MET:O    | 2:B:595:VAL:HG23 | 2.18                     | 0.43              |
| 3:M:61:GLU:OE2   | 3:M:82:LYS:HB2   | 2.19                     | 0.43              |
| 4:S:16:LEU:CB    | 4:S:125:TRP:CD1  | 3.01                     | 0.43              |
| 1:A:295:VAL:HG22 | 1:A:315:CYS:CB   | 2.19                     | 0.43              |
| 1:A:309:PHE:CZ   | 1:A:348:PHE:CE1  | 3.07                     | 0.43              |
| 1:A:532:LEU:O    | 1:A:535:ILE:N    | 2.51                     | 0.43              |
| 1:A:569:ASP:C    | 1:A:571:ARG:N    | 2.65                     | 0.43              |
| 1:A:576:MET:O    | 1:A:579:LYS:HB3  | 2.18                     | 0.43              |
| 1:A:637:GLU:HG2  | 2:B:512:VAL:O    | 2.19                     | 0.43              |
| 3:M:9:ASP:CG     | 3:M:13:LYS:HB3   | 2.38                     | 0.43              |
| 3:M:67:SER:CB    | 3:M:90:PHE:CB    | 2.96                     | 0.43              |
| 3:M:326:HIS:O    | 3:M:338:PHE:CA   | 2.50                     | 0.43              |
| 3:M:473:LYS:C    | 3:M:474:THR:CG2  | 2.86                     | 0.43              |
| 1:A:128:LEU:HD12 | 1:A:150:LEU:HD23 | 1.69                     | 0.43              |
| 1:A:200:PHE:HZ   | 1:A:235:GLN:HB2  | 1.82                     | 0.43              |
| 1:A:224:GLU:N    | 4:S:140:MET:HE3  | 2.31                     | 0.43              |
| 1:A:253:ILE:CG2  | 1:A:281:LEU:CB   | 2.97                     | 0.43              |
| 1:A:552:ILE:CD1  | 1:A:600:SER:CB   | 2.96                     | 0.43              |
| 1:A:563:CYS:CA   | 1:A:566:PHE:HD2  | 2.11                     | 0.43              |
| 2:B:24:ALA:HB2   | 2:B:35:TYR:CZ    | 2.36                     | 0.43              |
| 2:B:63:MET:HG2   | 2:B:101:ILE:N    | 2.33                     | 0.43              |
| 2:B:158:VAL:HG13 | 2:B:177:ILE:HG13 | 1.91                     | 0.43              |
| 2:B:178:ILE:HG23 | 2:B:217:GLU:N    | 2.33                     | 0.43              |
| 2:B:455:ILE:HD11 | 2:B:489:ILE:HG23 | 1.99                     | 0.43              |
| 2:B:537:PHE:CZ   | 2:B:598:LEU:C    | 2.91                     | 0.43              |
| 2:B:563:PHE:CE2  | 2:B:582:ASP:HB2  | 2.52                     | 0.43              |
| 3:M:220:GLU:O    | 3:M:439:TYR:HD1  | 2.02                     | 0.43              |
| 3:M:355:ASP:O    | 3:M:356:LEU:C    | 2.55                     | 0.43              |
| 3:M:373:ALA:O    | 3:M:417:TYR:HA   | 2.18                     | 0.43              |
| 4:S:34:GLN:CD    | 4:S:58:LEU:CG    | 2.83                     | 0.43              |
| 4:S:34:GLN:C     | 4:S:36:TYR:H     | 2.21                     | 0.43              |
| 4:S:107:GLU:HG3  | 4:S:146:VAL:CG1  | 2.48                     | 0.43              |
| 4:S:111:ARG:HB3  | 4:S:150:VAL:CG2  | 2.47                     | 0.43              |
| 4:S:117:ASN:CG   | 4:S:120:ASP:OD2  | 2.57                     | 0.43              |
| 1:A:402:ILE:O    | 1:A:403:LEU:C    | 2.54                     | 0.43              |
| 1:A:631:SER:CA   | 2:B:554:LYS:HA   | 2.49                     | 0.43              |
| 2:B:37:TYR:CE2   | 2:B:46:GLN:CD    | 2.87                     | 0.43              |
| 2:B:123:LEU:C    | 2:B:127:LEU:CD1  | 2.86                     | 0.43              |
| 2:B:151:ALA:CB   | 2:B:188:TYR:CE1  | 3.01                     | 0.43              |

*Continued on next page...*



*Continued from previous page...*

| Atom-1           | Atom-2           | Interatomic distance (Å) | Clash overlap (Å) |
|------------------|------------------|--------------------------|-------------------|
| 2:B:159:LYS:CG   | 2:B:191:GLU:OE1  | 2.66                     | 0.43              |
| 2:B:326:TYR:O    | 2:B:327:GLN:C    | 2.56                     | 0.43              |
| 2:B:334:MET:CE   | 2:B:334:MET:CA   | 2.86                     | 0.43              |
| 2:B:404:ASN:C    | 2:B:408:VAL:HG23 | 2.36                     | 0.43              |
| 2:B:433:VAL:HG11 | 2:B:474:VAL:CG2  | 2.35                     | 0.43              |
| 3:M:24:ALA:C     | 3:M:25:PRO:O     | 2.50                     | 0.43              |
| 3:M:118:TYR:HA   | 3:M:121:ILE:HD12 | 2.01                     | 0.43              |
| 3:M:304:VAL:CG1  | 3:M:445:SER:HA   | 2.43                     | 0.43              |
| 3:M:374:TYR:CE1  | 3:M:390:ILE:CD1  | 3.02                     | 0.43              |
| 1:A:104:ARG:CG   | 1:A:145:ILE:CG1  | 2.66                     | 0.43              |
| 1:A:144:GLY:CA   | 1:A:180:LYS:HG3  | 2.49                     | 0.43              |
| 1:A:429:VAL:CG2  | 1:A:469:LEU:HD21 | 2.40                     | 0.43              |
| 1:A:626:SER:O    | 1:A:630:PRO:CD   | 2.66                     | 0.43              |
| 2:B:116:THR:CG2  | 2:B:150:LEU:HD21 | 2.41                     | 0.43              |
| 2:B:212:VAL:HG23 | 2:B:233:TYR:CD2  | 2.53                     | 0.43              |
| 2:B:287:GLU:OE2  | 2:B:287:GLU:HA   | 2.18                     | 0.43              |
| 2:B:367:SER:CB   | 2:B:401:THR:OG1  | 2.67                     | 0.43              |
| 2:B:410:GLU:HA   | 2:B:413:LYS:HE2  | 2.01                     | 0.43              |
| 3:M:103:TYR:CE1  | 3:M:124:ILE:HG12 | 2.54                     | 0.43              |
| 3:M:271:SER:C    | 3:M:272:LEU:HD12 | 2.39                     | 0.43              |
| 3:M:380:ARG:HG2  | 3:M:410:VAL:O    | 2.19                     | 0.43              |
| 4:S:4:ALA:HB1    | 4:S:19:PHE:CD2   | 2.53                     | 0.43              |
| 4:S:14:PRO:CB    | 4:S:36:TYR:CE1   | 3.00                     | 0.43              |
| 4:S:75:ILE:CG2   | 4:S:86:THR:HG21  | 2.44                     | 0.43              |
| 4:S:87:PHE:CZ    | 4:S:102:ILE:HA   | 2.53                     | 0.43              |
| 1:A:125:THR:CA   | 1:A:158:LEU:HD13 | 2.49                     | 0.43              |
| 1:A:128:LEU:HB3  | 1:A:150:LEU:HD11 | 1.99                     | 0.43              |
| 1:A:219:VAL:CG2  | 1:A:240:LEU:HD22 | 2.28                     | 0.43              |
| 1:A:432:ILE:CG2  | 1:A:457:LEU:HD11 | 2.39                     | 0.43              |
| 1:A:524:THR:CG2  | 1:A:565:ASN:ND2  | 2.81                     | 0.43              |
| 2:B:13:ASP:O     | 2:B:14:THR:O     | 2.36                     | 0.43              |
| 2:B:108:PHE:HE2  | 2:B:115:LEU:HD23 | 1.82                     | 0.43              |
| 2:B:230:PHE:CG   | 2:B:298:ASP:HB3  | 2.42                     | 0.43              |
| 2:B:279:LEU:HB3  | 2:B:280:PRO:HD2  | 2.01                     | 0.43              |
| 2:B:329:ALA:HA   | 2:B:333:GLN:NE2  | 2.34                     | 0.43              |
| 2:B:367:SER:O    | 2:B:368:ILE:C    | 2.55                     | 0.43              |
| 2:B:537:PHE:CD2  | 2:B:537:PHE:O    | 2.71                     | 0.43              |
| 2:B:563:PHE:C    | 2:B:564:LYS:O    | 2.56                     | 0.43              |
| 2:B:567:GLN:OE1  | 2:B:618:PHE:CE1  | 2.71                     | 0.43              |
| 3:M:94:GLU:O     | 3:M:97:ASP:CB    | 2.64                     | 0.43              |
| 3:M:306:LEU:HD13 | 3:M:317:MET:HE3  | 1.99                     | 0.43              |

*Continued on next page...*

*Continued from previous page...*

| Atom-1           | Atom-2           | Interatomic distance (Å) | Clash overlap (Å) |
|------------------|------------------|--------------------------|-------------------|
| 3:M:377:LYS:HE3  | 3:M:416:GLU:HB2  | 1.97                     | 0.43              |
| 4:S:56:SER:C     | 4:S:60:SER:HB2   | 2.34                     | 0.43              |
| 1:A:107:TYR:HD1  | 1:A:145:ILE:HG22 | 1.84                     | 0.43              |
| 1:A:478:ARG:HG3  | 1:A:517:TRP:CE3  | 2.54                     | 0.43              |
| 1:A:589:SER:HB3  | 1:A:601:VAL:CG2  | 2.48                     | 0.43              |
| 2:B:139:LEU:HD21 | 2:B:176:ALA:HB3  | 1.97                     | 0.43              |
| 2:B:237:ILE:HD13 | 2:B:309:LEU:HD21 | 2.01                     | 0.43              |
| 2:B:546:CYS:SG   | 2:B:607:ILE:CA   | 3.06                     | 0.43              |
| 2:B:556:LEU:HA   | 2:B:588:ILE:HD11 | 0.49                     | 0.43              |
| 2:B:577:ASN:OD1  | 2:B:577:ASN:N    | 2.52                     | 0.43              |
| 2:B:588:ILE:HG23 | 2:B:589:SER:N    | 2.34                     | 0.43              |
| 3:M:343:ASN:ND2  | 3:M:343:ASN:N    | 2.56                     | 0.43              |
| 3:M:351:SER:O    | 3:M:352:GLN:HB3  | 2.19                     | 0.43              |
| 3:M:435:LEU:O    | 3:M:437:TYR:HE1  | 2.02                     | 0.43              |
| 4:S:38:LEU:HB3   | 4:S:51:LEU:CD1   | 2.47                     | 0.43              |
| 1:A:92:LEU:CD1   | 1:A:120:ILE:HA   | 2.15                     | 0.43              |
| 1:A:121:LEU:O    | 1:A:124:ALA:HB3  | 2.18                     | 0.43              |
| 1:A:395:PHE:CZ   | 1:A:428:MET:HB2  | 2.54                     | 0.43              |
| 2:B:83:PHE:CE2   | 2:B:119:SER:N    | 2.84                     | 0.43              |
| 2:B:98:LYS:CG    | 2:B:137:PHE:HB2  | 2.48                     | 0.43              |
| 2:B:123:LEU:CD2  | 2:B:138:ALA:CA   | 2.97                     | 0.43              |
| 2:B:130:SER:O    | 2:B:135:ARG:NH2  | 2.52                     | 0.43              |
| 2:B:200:MET:HE2  | 2:B:229:HIS:HA   | 1.69                     | 0.43              |
| 2:B:374:PHE:HB3  | 2:B:402:LEU:HD21 | 2.01                     | 0.43              |
| 3:M:96:ILE:HG21  | 3:M:125:PHE:CE2  | 2.54                     | 0.43              |
| 3:M:226:PHE:CG   | 3:M:481:VAL:HG22 | 2.53                     | 0.43              |
| 3:M:242:GLY:CA   | 3:M:474:THR:CG2  | 2.94                     | 0.43              |
| 3:M:374:TYR:CE1  | 3:M:376:ILE:HD11 | 2.54                     | 0.43              |
| 4:S:16:LEU:HD11  | 4:S:129:GLU:CG   | 2.49                     | 0.43              |
| 4:S:17:VAL:CG1   | 4:S:19:PHE:HE1   | 2.24                     | 0.43              |
| 1:A:63:ASP:C     | 1:A:63:ASP:OD1   | 2.57                     | 0.42              |
| 1:A:226:SER:CB   | 1:A:263:LEU:HD23 | 2.49                     | 0.42              |
| 1:A:379:VAL:HG22 | 1:A:380:ASP:N    | 2.34                     | 0.42              |
| 1:A:555:LEU:O    | 1:A:558:VAL:HB   | 2.19                     | 0.42              |
| 2:B:59:VAL:O     | 2:B:59:VAL:CG1   | 2.66                     | 0.42              |
| 2:B:60:ARG:O     | 2:B:100:LEU:HD13 | 2.18                     | 0.42              |
| 2:B:80:GLN:HA    | 2:B:115:LEU:CD1  | 2.48                     | 0.42              |
| 2:B:83:PHE:HZ    | 2:B:119:SER:OG   | 1.94                     | 0.42              |
| 2:B:127:LEU:CD2  | 2:B:139:LEU:HB2  | 2.49                     | 0.42              |
| 2:B:159:LYS:HD2  | 2:B:191:GLU:CD   | 2.39                     | 0.42              |
| 2:B:261:PRO:C    | 2:B:290:SER:CB   | 2.86                     | 0.42              |

*Continued on next page...*

*Continued from previous page...*

| Atom-1           | Atom-2           | Interatomic distance (Å) | Clash overlap (Å) |
|------------------|------------------|--------------------------|-------------------|
| 2:B:285:GLU:N    | 2:B:285:GLU:OE2  | 2.52                     | 0.42              |
| 2:B:366:LEU:O    | 2:B:368:ILE:N    | 2.48                     | 0.42              |
| 2:B:397:GLN:O    | 2:B:400:SER:OG   | 2.16                     | 0.42              |
| 2:B:520:SER:C    | 2:B:523:PHE:HD2  | 2.22                     | 0.42              |
| 2:B:588:ILE:HG21 | 2:B:618:PHE:CE1  | 2.54                     | 0.42              |
| 3:M:60:LEU:CD2   | 3:M:60:LEU:C     | 2.87                     | 0.42              |
| 3:M:215:TYR:HD2  | 3:M:469:GLY:C    | 2.23                     | 0.42              |
| 3:M:240:ILE:HG21 | 3:M:444:ALA:HA   | 2.01                     | 0.42              |
| 3:M:466:LEU:HD23 | 3:M:467:TYR:O    | 2.18                     | 0.42              |
| 1:A:250:ASN:CG   | 1:A:285:THR:HB   | 2.40                     | 0.42              |
| 1:A:375:VAL:O    | 1:A:376:GLU:C    | 2.57                     | 0.42              |
| 1:A:419:ILE:O    | 1:A:419:ILE:HG12 | 2.20                     | 0.42              |
| 1:A:507:GLN:O    | 1:A:509:PRO:HD2  | 2.18                     | 0.42              |
| 1:A:509:PRO:CA   | 1:A:547:VAL:HG21 | 2.49                     | 0.42              |
| 1:A:532:LEU:O    | 1:A:535:ILE:C    | 2.56                     | 0.42              |
| 1:A:552:ILE:CD1  | 1:A:600:SER:HB2  | 2.48                     | 0.42              |
| 1:A:575:LYS:CE   | 1:A:611:LEU:HD21 | 2.46                     | 0.42              |
| 2:B:127:LEU:CD2  | 2:B:157:THR:HG21 | 2.41                     | 0.42              |
| 2:B:167:ALA:O    | 2:B:202:ASP:CG   | 2.56                     | 0.42              |
| 2:B:174:ALA:C    | 2:B:214:ALA:HB2  | 2.40                     | 0.42              |
| 2:B:230:PHE:HB3  | 2:B:298:ASP:CG   | 2.38                     | 0.42              |
| 2:B:230:PHE:HD2  | 2:B:298:ASP:CA   | 2.32                     | 0.42              |
| 2:B:277:CYS:O    | 2:B:288:TYR:HA   | 2.18                     | 0.42              |
| 2:B:393:ILE:HG21 | 2:B:431:MET:HE2  | 2.01                     | 0.42              |
| 2:B:560:ILE:CG2  | 2:B:561:ASP:N    | 2.79                     | 0.42              |
| 2:B:560:ILE:O    | 2:B:563:PHE:N    | 2.51                     | 0.42              |
| 3:M:7:ILE:HG23   | 3:M:75:TRP:C     | 2.38                     | 0.42              |
| 4:S:5:VAL:O      | 4:S:17:VAL:CA    | 2.55                     | 0.42              |
| 4:S:56:SER:C     | 4:S:57:LEU:HD12  | 2.39                     | 0.42              |
| 1:A:147:LEU:CG   | 1:A:166:LEU:HD21 | 2.45                     | 0.42              |
| 1:A:222:ILE:CG2  | 1:A:233:PHE:HB3  | 2.42                     | 0.42              |
| 1:A:359:LEU:HD22 | 1:A:367:ILE:CG2  | 2.48                     | 0.42              |
| 1:A:450:TYR:OH   | 1:A:476:GLN:NE2  | 2.52                     | 0.42              |
| 2:B:139:LEU:CD2  | 2:B:173:VAL:HG13 | 2.49                     | 0.42              |
| 2:B:549:LEU:CD1  | 2:B:611:ALA:HB1  | 2.21                     | 0.42              |
| 3:M:226:PHE:CE2  | 3:M:321:GLY:O    | 2.69                     | 0.42              |
| 3:M:336:ASP:CG   | 3:M:415:ILE:HB   | 2.37                     | 0.42              |
| 1:A:75:THR:O     | 1:A:79:MET:HG3   | 2.19                     | 0.42              |
| 1:A:102:GLN:N    | 4:S:163:THR:C    | 2.71                     | 0.42              |
| 1:A:213:SER:N    | 4:S:148:ARG:CD   | 2.57                     | 0.42              |
| 1:A:514:GLU:OE1  | 1:A:514:GLU:HA   | 2.20                     | 0.42              |

*Continued on next page...*

*Continued from previous page...*

| Atom-1           | Atom-2           | Interatomic distance (Å) | Clash overlap (Å) |
|------------------|------------------|--------------------------|-------------------|
| 2:B:18:ILE:HD13  | 2:B:18:ILE:N     | 2.32                     | 0.42              |
| 2:B:47:LEU:HD11  | 2:B:66:ILE:HA    | 1.98                     | 0.42              |
| 2:B:189:HIS:CD2  | 2:B:222:HIS:CG   | 3.08                     | 0.42              |
| 2:B:245:GLN:HB3  | 2:B:309:LEU:HD11 | 2.02                     | 0.42              |
| 2:B:292:GLU:CD   | 2:B:296:ASP:OD2  | 2.50                     | 0.42              |
| 2:B:303:LEU:CD1  | 2:B:333:GLN:HG2  | 2.45                     | 0.42              |
| 2:B:310:ILE:HG12 | 2:B:318:ILE:HG23 | 2.01                     | 0.42              |
| 2:B:350:THR:HA   | 2:B:351:GLU:OE2  | 2.20                     | 0.42              |
| 2:B:403:ILE:CA   | 2:B:411:ILE:HD12 | 2.48                     | 0.42              |
| 2:B:437:SER:CA   | 2:B:478:LEU:CD2  | 2.71                     | 0.42              |
| 2:B:589:SER:O    | 2:B:591:MET:N    | 2.52                     | 0.42              |
| 3:M:220:GLU:O    | 3:M:439:TYR:CD1  | 2.73                     | 0.42              |
| 3:M:243:ILE:C    | 3:M:472:TYR:CD2  | 2.89                     | 0.42              |
| 3:M:276:VAL:HG22 | 3:M:290:PHE:HD1  | 1.84                     | 0.42              |
| 3:M:410:VAL:HG11 | 3:M:412:ARG:HH11 | 1.80                     | 0.42              |
| 1:A:143:VAL:HG13 | 1:A:169:MET:HG3  | 2.00                     | 0.42              |
| 1:A:213:SER:HB2  | 4:S:143:GLU:HB3  | 2.01                     | 0.42              |
| 1:A:288:THR:OG1  | 1:A:291:ILE:CG1  | 2.67                     | 0.42              |
| 1:A:339:TYR:HB2  | 1:A:374:LEU:HD11 | 2.01                     | 0.42              |
| 1:A:349:ILE:O    | 1:A:350:SER:C    | 2.56                     | 0.42              |
| 1:A:483:LYS:O    | 1:A:484:VAL:CB   | 2.65                     | 0.42              |
| 2:B:37:TYR:C     | 2:B:39:SER:H     | 2.20                     | 0.42              |
| 2:B:106:LEU:CD2  | 2:B:144:ASP:HB2  | 2.48                     | 0.42              |
| 2:B:121:ASN:HA   | 2:B:153:ILE:HG21 | 2.01                     | 0.42              |
| 2:B:256:CYS:O    | 2:B:260:LEU:N    | 2.53                     | 0.42              |
| 2:B:340:ILE:CD1  | 2:B:366:LEU:HD13 | 2.23                     | 0.42              |
| 2:B:399:LEU:HD12 | 2:B:415:LEU:HD23 | 2.01                     | 0.42              |
| 3:M:243:ILE:HD13 | 3:M:301:GLU:HB3  | 2.00                     | 0.42              |
| 1:A:102:GLN:C    | 4:S:167:ILE:HG12 | 2.32                     | 0.42              |
| 1:A:200:PHE:CZ   | 1:A:236:LEU:HG   | 2.54                     | 0.42              |
| 1:A:348:PHE:HB3  | 1:A:352:PHE:CE1  | 2.53                     | 0.42              |
| 1:A:552:ILE:CG2  | 1:A:603:VAL:HG21 | 2.45                     | 0.42              |
| 1:A:555:LEU:HD12 | 1:A:585:PHE:HE1  | 1.83                     | 0.42              |
| 1:A:558:VAL:C    | 1:A:560:SER:N    | 2.73                     | 0.42              |
| 2:B:50:LEU:CD1   | 2:B:58:GLU:HB3   | 2.49                     | 0.42              |
| 2:B:178:ILE:CG2  | 2:B:217:GLU:CB   | 2.75                     | 0.42              |
| 2:B:195:ILE:O    | 2:B:196:LEU:C    | 2.55                     | 0.42              |
| 2:B:307:ASN:O    | 2:B:308:CYS:C    | 2.57                     | 0.42              |
| 2:B:418:TYR:CE1  | 2:B:419:VAL:HG22 | 2.53                     | 0.42              |
| 2:B:475:ILE:HG21 | 2:B:514:LEU:HD21 | 1.98                     | 0.42              |
| 1:A:171:ASN:HB2  | 1:A:202:LYS:HE2  | 2.02                     | 0.42              |

*Continued on next page...*

*Continued from previous page...*

| Atom-1           | Atom-2           | Interatomic distance (Å) | Clash overlap (Å) |
|------------------|------------------|--------------------------|-------------------|
| 1:A:182:ILE:HG21 | 1:A:217:ALA:C    | 2.39                     | 0.42              |
| 1:A:564:ASN:OD1  | 1:A:622:PRO:HG2  | 2.17                     | 0.42              |
| 1:A:623:MET:O    | 2:B:617:LEU:HG   | 2.19                     | 0.42              |
| 2:B:37:TYR:CD2   | 2:B:42:ILE:HA    | 2.53                     | 0.42              |
| 2:B:62:ALA:C     | 2:B:66:ILE:HD11  | 2.34                     | 0.42              |
| 2:B:215:TYR:OH   | 2:B:229:HIS:HB3  | 2.17                     | 0.42              |
| 2:B:396:ILE:HD13 | 2:B:418:TYR:CZ   | 2.47                     | 0.42              |
| 2:B:534:ILE:HA   | 2:B:598:LEU:HD12 | 2.02                     | 0.42              |
| 2:B:556:LEU:HD12 | 2:B:614:ILE:CG2  | 2.49                     | 0.42              |
| 2:B:592:TYR:CD1  | 2:B:593:ASN:N    | 2.88                     | 0.42              |
| 3:M:2:TYR:C      | 3:M:81:SER:CB    | 2.77                     | 0.42              |
| 3:M:428:VAL:O    | 3:M:430:LEU:HA   | 2.19                     | 0.42              |
| 4:S:47:GLN:O     | 4:S:49:SER:N     | 2.49                     | 0.42              |
| 4:S:50:PHE:CA    | 4:S:77:TYR:HD1   | 2.28                     | 0.42              |
| 4:S:122:ILE:O    | 4:S:123:PHE:C    | 2.56                     | 0.42              |
| 1:A:91:ILE:HD12  | 1:A:109:ALA:HB3  | 2.01                     | 0.42              |
| 1:A:100:LEU:HD22 | 1:A:138:ASN:CB   | 2.48                     | 0.42              |
| 1:A:183:THR:N    | 4:S:142:ILE:HD13 | 2.34                     | 0.42              |
| 1:A:274:LEU:O    | 1:A:277:LYS:N    | 2.52                     | 0.42              |
| 1:A:634:ASN:ND2  | 2:B:554:LYS:H    | 2.15                     | 0.42              |
| 2:B:47:LEU:HD22  | 2:B:66:ILE:CA    | 2.50                     | 0.42              |
| 2:B:154:ILE:HG21 | 2:B:180:LEU:CB   | 2.50                     | 0.42              |
| 2:B:336:ASN:HD21 | 2:B:338:LYS:HB2  | 1.80                     | 0.42              |
| 2:B:383:VAL:CG2  | 2:B:384:PHE:N    | 2.83                     | 0.42              |
| 2:B:560:ILE:HG22 | 2:B:561:ASP:H    | 1.83                     | 0.42              |
| 3:M:219:LEU:H    | 3:M:472:TYR:HB2  | 1.84                     | 0.42              |
| 3:M:245:ASP:C    | 3:M:246:VAL:HG23 | 2.40                     | 0.42              |
| 4:S:1:MET:H3     | 4:S:93:GLU:HB2   | 1.85                     | 0.42              |
| 1:A:66:SER:N     | 4:S:165:SER:CB   | 2.66                     | 0.42              |
| 1:A:97:SER:CA    | 1:A:98:ASN:O     | 2.66                     | 0.42              |
| 1:A:219:VAL:CG2  | 1:A:256:LEU:HD23 | 2.48                     | 0.42              |
| 1:A:271:ARG:HH11 | 1:A:303:MET:HA   | 1.85                     | 0.42              |
| 1:A:336:ILE:HG23 | 1:A:340:LYS:HE3  | 2.02                     | 0.42              |
| 1:A:401:VAL:HB   | 1:A:419:ILE:HB   | 2.02                     | 0.42              |
| 2:B:105:LEU:CB   | 2:B:145:MET:HE1  | 2.39                     | 0.42              |
| 2:B:114:ASN:O    | 2:B:117:LEU:CB   | 2.63                     | 0.42              |
| 2:B:216:LYS:HB2  | 2:B:251:LEU:CB   | 2.50                     | 0.42              |
| 2:B:380:LYS:HZ2  | 3:M:237:THR:CG2  | 2.33                     | 0.42              |
| 2:B:562:ASN:CG   | 2:B:580:TYR:CG   | 2.92                     | 0.42              |
| 3:M:74:TYR:CE1   | 3:M:76:CYS:SG    | 3.13                     | 0.42              |
| 3:M:265:ASN:OD1  | 3:M:313:SER:HB3  | 2.15                     | 0.42              |

*Continued on next page...*

*Continued from previous page...*

| Atom-1           | Atom-2           | Interatomic distance (Å) | Clash overlap (Å) |
|------------------|------------------|--------------------------|-------------------|
| 4:S:16:LEU:CD1   | 4:S:17:VAL:N     | 2.80                     | 0.42              |
| 4:S:47:GLN:NE2   | 4:S:47:GLN:C     | 2.73                     | 0.42              |
| 1:A:121:LEU:HD11 | 1:A:155:THR:OG1  | 2.20                     | 0.42              |
| 1:A:213:SER:HB2  | 4:S:143:GLU:OE1  | 2.12                     | 0.42              |
| 1:A:263:LEU:O    | 1:A:264:SER:C    | 2.53                     | 0.42              |
| 1:A:288:THR:OG1  | 1:A:291:ILE:HD13 | 2.19                     | 0.42              |
| 1:A:421:PRO:CB   | 1:A:424:TYR:CE1  | 3.03                     | 0.42              |
| 1:A:524:THR:CG2  | 1:A:565:ASN:HD22 | 2.32                     | 0.42              |
| 1:A:552:ILE:HD13 | 1:A:600:SER:HB2  | 2.01                     | 0.42              |
| 1:A:627:GLU:HA   | 2:B:617:LEU:HB2  | 1.18                     | 0.42              |
| 2:B:13:ASP:O     | 2:B:14:THR:C     | 2.59                     | 0.42              |
| 2:B:90:ILE:O     | 2:B:98:LYS:CE    | 2.68                     | 0.42              |
| 2:B:151:ALA:C    | 2:B:153:ILE:H    | 2.24                     | 0.42              |
| 2:B:158:VAL:CB   | 2:B:177:ILE:CG1  | 2.89                     | 0.42              |
| 2:B:172:GLU:OE1  | 2:B:175:LEU:HD12 | 2.19                     | 0.42              |
| 2:B:176:ALA:O    | 2:B:178:ILE:C    | 2.58                     | 0.42              |
| 2:B:177:ILE:CD1  | 2:B:196:LEU:CG   | 2.96                     | 0.42              |
| 2:B:240:LEU:HB3  | 2:B:241:ASP:H    | 1.77                     | 0.42              |
| 2:B:408:VAL:HG13 | 2:B:412:PHE:CE2  | 2.48                     | 0.42              |
| 2:B:527:PRO:HB3  | 2:B:587:ARG:O    | 2.20                     | 0.42              |
| 3:M:218:LEU:N    | 3:M:218:LEU:CD1  | 2.82                     | 0.42              |
| 3:M:222:PHE:HD1  | 3:M:222:PHE:N    | 2.18                     | 0.42              |
| 4:S:7:ILE:CG2    | 4:S:121:LEU:HD23 | 2.50                     | 0.42              |
| 4:S:14:PRO:C     | 4:S:15:ARG:HG2   | 2.40                     | 0.42              |
| 1:A:134:TYR:CD2  | 1:A:136:GLY:N    | 2.84                     | 0.41              |
| 1:A:180:LYS:O    | 1:A:183:THR:N    | 2.53                     | 0.41              |
| 1:A:183:THR:OG1  | 4:S:142:ILE:CG1  | 2.65                     | 0.41              |
| 1:A:226:SER:HB3  | 1:A:263:LEU:CD2  | 2.50                     | 0.41              |
| 1:A:253:ILE:HG21 | 1:A:281:LEU:CB   | 2.47                     | 0.41              |
| 1:A:374:LEU:CA   | 1:A:376:GLU:OE1  | 2.64                     | 0.41              |
| 1:A:429:VAL:O    | 1:A:432:ILE:HB   | 2.19                     | 0.41              |
| 1:A:509:PRO:CA   | 1:A:547:VAL:CG2  | 2.98                     | 0.41              |
| 2:B:106:LEU:HD22 | 2:B:144:ASP:HB2  | 2.02                     | 0.41              |
| 2:B:131:ASN:O    | 2:B:135:ARG:HG3  | 2.20                     | 0.41              |
| 2:B:135:ARG:CZ   | 2:B:164:ASP:CB   | 2.95                     | 0.41              |
| 2:B:135:ARG:O    | 2:B:161:LEU:HD21 | 2.20                     | 0.41              |
| 2:B:154:ILE:O    | 2:B:157:THR:HB   | 2.20                     | 0.41              |
| 2:B:227:HIS:ND1  | 2:B:292:GLU:HG2  | 2.35                     | 0.41              |
| 2:B:306:LEU:CD1  | 2:B:325:LEU:HD23 | 2.44                     | 0.41              |
| 2:B:424:PHE:HA   | 2:B:425:PRO:HD3  | 1.58                     | 0.41              |
| 2:B:447:GLU:HG3  | 2:B:482:ASN:ND2  | 2.35                     | 0.41              |

*Continued on next page...*

*Continued from previous page...*

| Atom-1           | Atom-2           | Interatomic distance (Å) | Clash overlap (Å) |
|------------------|------------------|--------------------------|-------------------|
| 3:M:95:THR:HG22  | 3:M:99:ILE:HD11  | 2.01                     | 0.41              |
| 3:M:214:LEU:C    | 3:M:214:LEU:CD2  | 2.80                     | 0.41              |
| 3:M:283:PHE:CD2  | 3:M:289:THR:OG1  | 2.60                     | 0.41              |
| 3:M:380:ARG:HB3  | 3:M:412:ARG:N    | 2.35                     | 0.41              |
| 3:M:381:ASN:HD21 | 3:M:384:GLY:HA3  | 1.83                     | 0.41              |
| 3:M:386:PHE:HB2  | 3:M:397:TRP:HD1  | 1.81                     | 0.41              |
| 3:M:445:SER:OG   | 3:M:447:ILE:HG23 | 2.19                     | 0.41              |
| 4:S:47:GLN:HE22  | 4:S:78:LYS:C     | 2.22                     | 0.41              |
| 4:S:53:THR:OG1   | 4:S:68:VAL:CA    | 2.68                     | 0.41              |
| 4:S:101:LEU:HG   | 4:S:135:ILE:CG2  | 2.49                     | 0.41              |
| 1:A:100:LEU:CB   | 1:A:142:LYS:CG   | 2.98                     | 0.41              |
| 1:A:140:VAL:CG2  | 1:A:174:ARG:CB   | 2.97                     | 0.41              |
| 1:A:185:LEU:HD22 | 1:A:189:PHE:HZ   | 1.80                     | 0.41              |
| 1:A:245:VAL:O    | 1:A:245:VAL:HG22 | 2.20                     | 0.41              |
| 2:B:153:ILE:O    | 2:B:154:ILE:C    | 2.58                     | 0.41              |
| 3:M:8:THR:OG1    | 3:M:75:TRP:CB    | 2.67                     | 0.41              |
| 3:M:16:PHE:CE2   | 3:M:125:PHE:CZ   | 3.08                     | 0.41              |
| 3:M:218:LEU:H    | 3:M:218:LEU:CD1  | 2.33                     | 0.41              |
| 3:M:223:HIS:HE1  | 3:M:476:THR:H    | 1.61                     | 0.41              |
| 3:M:256:VAL:HG11 | 3:M:290:PHE:HB3  | 1.95                     | 0.41              |
| 3:M:276:VAL:CG1  | 3:M:299:LEU:CD1  | 2.98                     | 0.41              |
| 3:M:343:ASN:ND2  | 3:M:343:ASN:H    | 2.13                     | 0.41              |
| 3:M:360:LEU:CG   | 3:M:362:PHE:CE2  | 3.03                     | 0.41              |
| 1:A:145:ILE:O    | 1:A:147:LEU:N    | 2.54                     | 0.41              |
| 1:A:170:LEU:HB2  | 1:A:202:LYS:CG   | 2.50                     | 0.41              |
| 1:A:175:PRO:HG3  | 1:A:211:ASP:HB2  | 2.01                     | 0.41              |
| 1:A:220:SER:OG   | 4:S:141:VAL:N    | 2.26                     | 0.41              |
| 1:A:270:LEU:HD12 | 1:A:274:LEU:CD2  | 2.50                     | 0.41              |
| 1:A:385:LYS:NZ   | 1:A:445:ASN:OD1  | 2.52                     | 0.41              |
| 1:A:403:LEU:CD2  | 1:A:421:PRO:O    | 2.64                     | 0.41              |
| 1:A:557:LYS:CD   | 2:B:606:ASP:HB2  | 2.50                     | 0.41              |
| 1:A:567:GLN:C    | 1:A:569:ASP:N    | 2.72                     | 0.41              |
| 1:A:589:SER:HB2  | 1:A:601:VAL:HG22 | 1.89                     | 0.41              |
| 2:B:127:LEU:HD11 | 2:B:142:LEU:CD1  | 2.50                     | 0.41              |
| 2:B:169:VAL:O    | 2:B:173:VAL:N    | 2.47                     | 0.41              |
| 2:B:212:VAL:CG1  | 2:B:248:LEU:CD2  | 2.97                     | 0.41              |
| 2:B:260:LEU:CG   | 2:B:291:TYR:CE1  | 2.90                     | 0.41              |
| 2:B:285:GLU:N    | 2:B:285:GLU:CD   | 2.73                     | 0.41              |
| 3:M:244:VAL:CG2  | 3:M:472:TYR:HE2  | 2.32                     | 0.41              |
| 3:M:246:VAL:CB   | 3:M:297:PHE:CE1  | 3.02                     | 0.41              |
| 3:M:290:PHE:CD1  | 3:M:299:LEU:CD1  | 3.03                     | 0.41              |

*Continued on next page...*

*Continued from previous page...*

| Atom-1           | Atom-2           | Interatomic distance (Å) | Clash overlap (Å) |
|------------------|------------------|--------------------------|-------------------|
| 3:M:306:LEU:HD22 | 3:M:310:VAL:HG23 | 2.02                     | 0.41              |
| 3:M:311:LYS:O    | 3:M:312:GLN:C    | 2.55                     | 0.41              |
| 3:M:411:LEU:O    | 3:M:412:ARG:HG3  | 2.20                     | 0.41              |
| 4:S:58:LEU:HD13  | 4:S:68:VAL:CG1   | 2.50                     | 0.41              |
| 1:A:73:LYS:O     | 1:A:76:TYR:HB2   | 2.21                     | 0.41              |
| 1:A:92:LEU:O     | 1:A:94:VAL:N     | 2.53                     | 0.41              |
| 1:A:104:ARG:N    | 4:S:167:ILE:HD11 | 2.35                     | 0.41              |
| 1:A:332:TYR:CE2  | 1:A:336:ILE:HD12 | 2.55                     | 0.41              |
| 1:A:338:PHE:O    | 1:A:341:ILE:HB   | 2.21                     | 0.41              |
| 1:A:356:ILE:O    | 1:A:359:LEU:HB2  | 2.20                     | 0.41              |
| 1:A:480:LEU:C    | 1:A:480:LEU:CD1  | 2.88                     | 0.41              |
| 2:B:252:LEU:CB   | 2:B:302:PHE:CG   | 2.99                     | 0.41              |
| 2:B:296:ASP:C    | 2:B:298:ASP:N    | 2.72                     | 0.41              |
| 2:B:389:ILE:O    | 2:B:393:ILE:CG1  | 2.68                     | 0.41              |
| 2:B:519:ALA:CB   | 2:B:555:LEU:HD12 | 2.49                     | 0.41              |
| 2:B:528:ASP:HA   | 2:B:531:ARG:NH1  | 2.35                     | 0.41              |
| 3:M:319:SER:HB2  | 3:M:346:ASN:C    | 2.40                     | 0.41              |
| 4:S:58:LEU:HA    | 4:S:68:VAL:HG22  | 2.02                     | 0.41              |
| 1:A:125:THR:OG1  | 1:A:158:LEU:HB2  | 2.21                     | 0.41              |
| 1:A:175:PRO:HA   | 1:A:214:VAL:HG21 | 2.01                     | 0.41              |
| 1:A:215:VAL:HG21 | 1:A:243:ILE:HG23 | 1.18                     | 0.41              |
| 1:A:420:ILE:HA   | 1:A:421:PRO:HD3  | 1.83                     | 0.41              |
| 1:A:462:GLN:NE2  | 2:B:1:MET:CE     | 2.83                     | 0.41              |
| 1:A:523:SER:OG   | 1:A:562:TRP:CD1  | 2.57                     | 0.41              |
| 1:A:626:SER:OG   | 2:B:616:SER:HB2  | 2.21                     | 0.41              |
| 2:B:63:MET:HB3   | 2:B:100:LEU:CD1  | 2.51                     | 0.41              |
| 2:B:105:LEU:C    | 2:B:145:MET:HE1  | 2.40                     | 0.41              |
| 2:B:266:VAL:CA   | 2:B:289:PRO:HB2  | 2.48                     | 0.41              |
| 2:B:311:TYR:CD2  | 2:B:342:ALA:HB1  | 2.53                     | 0.41              |
| 2:B:357:GLU:CG   | 2:B:361:GLN:NE2  | 2.80                     | 0.41              |
| 2:B:458:MET:C    | 2:B:460:SER:N    | 2.73                     | 0.41              |
| 2:B:533:LEU:O    | 2:B:536:ASN:N    | 2.42                     | 0.41              |
| 2:B:559:ASP:CG   | 2:B:563:PHE:CE1  | 2.92                     | 0.41              |
| 3:M:8:THR:OG1    | 3:M:75:TRP:HB2   | 2.20                     | 0.41              |
| 3:M:223:HIS:C    | 3:M:479:PHE:CG   | 2.83                     | 0.41              |
| 3:M:374:TYR:O    | 3:M:390:ILE:CG2  | 2.68                     | 0.41              |
| 1:A:100:LEU:CB   | 4:S:162:SER:HB2  | 2.51                     | 0.41              |
| 1:A:140:VAL:O    | 1:A:141:VAL:O    | 2.38                     | 0.41              |
| 1:A:396:VAL:O    | 1:A:397:ASP:OD1  | 2.37                     | 0.41              |
| 2:B:25:VAL:HG22  | 2:B:35:TYR:HB3   | 2.03                     | 0.41              |
| 2:B:123:LEU:HB2  | 2:B:142:LEU:CD1  | 2.45                     | 0.41              |

*Continued on next page...*



*Continued from previous page...*

| Atom-1           | Atom-2           | Interatomic distance (Å) | Clash overlap (Å) |
|------------------|------------------|--------------------------|-------------------|
| 2:B:135:ARG:HH22 | 2:B:164:ASP:CB   | 2.27                     | 0.41              |
| 2:B:167:ALA:O    | 2:B:207:VAL:CG1  | 2.68                     | 0.41              |
| 2:B:537:PHE:CE1  | 2:B:545:ARG:CB   | 3.03                     | 0.41              |
| 2:B:617:LEU:O    | 2:B:618:PHE:C    | 2.58                     | 0.41              |
| 3:M:80:THR:O     | 3:M:81:SER:CB    | 2.69                     | 0.41              |
| 3:M:118:TYR:CD2  | 3:M:118:TYR:O    | 2.74                     | 0.41              |
| 3:M:221:THR:HG22 | 3:M:223:HIS:CE1  | 2.55                     | 0.41              |
| 3:M:352:GLN:CB   | 3:M:401:LYS:O    | 2.69                     | 0.41              |
| 3:M:379:LEU:HD13 | 3:M:386:PHE:CE1  | 2.56                     | 0.41              |
| 3:M:429:ASP:O    | 3:M:430:LEU:C    | 2.57                     | 0.41              |
| 1:A:100:LEU:CD1  | 1:A:141:VAL:HG11 | 2.49                     | 0.41              |
| 1:A:140:VAL:HG13 | 1:A:176:TYR:HB2  | 1.87                     | 0.41              |
| 1:A:163:ALA:C    | 1:A:165:ASP:N    | 2.71                     | 0.41              |
| 1:A:222:ILE:HG23 | 1:A:233:PHE:CB   | 2.43                     | 0.41              |
| 1:A:436:CYS:CB   | 1:A:450:TYR:CZ   | 3.04                     | 0.41              |
| 1:A:536:MET:HB3  | 1:A:555:LEU:HD21 | 2.01                     | 0.41              |
| 1:A:559:PHE:CD2  | 1:A:578:LEU:HD23 | 2.55                     | 0.41              |
| 1:A:609:LEU:C    | 1:A:611:LEU:N    | 2.73                     | 0.41              |
| 2:B:137:PHE:O    | 2:B:140:SER:N    | 2.50                     | 0.41              |
| 2:B:159:LYS:CD   | 2:B:191:GLU:CD   | 2.89                     | 0.41              |
| 2:B:181:TYR:CD2  | 2:B:218:CYS:CB   | 2.90                     | 0.41              |
| 2:B:212:VAL:CG2  | 2:B:233:TYR:CD2  | 3.03                     | 0.41              |
| 2:B:257:LYS:O    | 2:B:260:LEU:HG   | 2.20                     | 0.41              |
| 2:B:319:LEU:C    | 2:B:321:CYS:N    | 2.73                     | 0.41              |
| 2:B:467:VAL:CG1  | 2:B:471:TYR:CE1  | 3.04                     | 0.41              |
| 2:B:537:PHE:CA   | 2:B:598:LEU:HD13 | 2.37                     | 0.41              |
| 3:M:347:PHE:CE2  | 3:M:350:VAL:CG1  | 3.04                     | 0.41              |
| 1:A:147:LEU:O    | 1:A:184:ALA:HB1  | 2.21                     | 0.41              |
| 1:A:179:LYS:O    | 4:S:142:ILE:HD12 | 2.16                     | 0.41              |
| 1:A:212:ILE:CB   | 4:S:145:ASN:ND2  | 2.81                     | 0.41              |
| 1:A:401:VAL:HG11 | 1:A:419:ILE:HD12 | 2.00                     | 0.41              |
| 1:A:516:ILE:CD1  | 1:A:551:LEU:HB2  | 2.51                     | 0.41              |
| 1:A:630:PRO:O    | 2:B:554:LYS:HB2  | 2.21                     | 0.41              |
| 2:B:78:ASP:OD1   | 2:B:80:GLN:CB    | 2.56                     | 0.41              |
| 2:B:158:VAL:CB   | 2:B:177:ILE:HG13 | 2.48                     | 0.41              |
| 2:B:328:LEU:O    | 2:B:329:ALA:C    | 2.50                     | 0.41              |
| 2:B:344:VAL:HG22 | 2:B:363:ILE:HD12 | 1.94                     | 0.41              |
| 2:B:520:SER:CA   | 2:B:523:PHE:CD2  | 3.03                     | 0.41              |
| 2:B:537:PHE:HA   | 2:B:540:GLU:CD   | 2.40                     | 0.41              |
| 3:M:217:ASP:OD2  | 3:M:440:ILE:CG2  | 2.69                     | 0.41              |
| 3:M:342:LEU:CD1  | 3:M:411:LEU:HB3  | 2.27                     | 0.41              |

*Continued on next page...*

*Continued from previous page...*

| Atom-1           | Atom-2           | Interatomic distance (Å) | Clash overlap (Å) |
|------------------|------------------|--------------------------|-------------------|
| 3:M:410:VAL:CG1  | 3:M:412:ARG:NH1  | 2.73                     | 0.41              |
| 1:A:99:LYS:HE2   | 1:A:101:GLN:HB3  | 2.02                     | 0.41              |
| 1:A:375:VAL:O    | 1:A:378:ILE:N    | 2.53                     | 0.41              |
| 1:A:420:ILE:HG23 | 1:A:424:TYR:HB2  | 2.03                     | 0.41              |
| 1:A:443:SER:O    | 1:A:445:ASN:N    | 2.47                     | 0.41              |
| 1:A:461:CYS:SG   | 1:A:469:LEU:CB   | 3.02                     | 0.41              |
| 1:A:567:GLN:O    | 1:A:569:ASP:N    | 2.53                     | 0.41              |
| 1:A:588:LEU:C    | 1:A:590:TYR:N    | 2.72                     | 0.41              |
| 1:A:626:SER:OG   | 2:B:617:LEU:HG   | 2.21                     | 0.41              |
| 2:B:48:VAL:HG22  | 2:B:82:TYR:CE2   | 2.53                     | 0.41              |
| 2:B:56:SER:HB3   | 2:B:92:THR:HG23  | 1.90                     | 0.41              |
| 2:B:106:LEU:HD11 | 2:B:144:ASP:C    | 2.29                     | 0.41              |
| 2:B:169:VAL:HG12 | 2:B:173:VAL:HG21 | 2.01                     | 0.41              |
| 2:B:216:LYS:HD3  | 2:B:251:LEU:CB   | 2.49                     | 0.41              |
| 2:B:231:ARG:C    | 2:B:233:TYR:H    | 2.24                     | 0.41              |
| 2:B:343:LEU:CD2  | 2:B:363:ILE:N    | 2.84                     | 0.41              |
| 2:B:444:THR:O    | 2:B:446:TRP:N    | 2.53                     | 0.41              |
| 2:B:567:GLN:CB   | 2:B:569:THR:OG1  | 2.68                     | 0.41              |
| 2:B:587:ARG:O    | 2:B:591:MET:HG2  | 2.21                     | 0.41              |
| 3:M:96:ILE:HD13  | 3:M:96:ILE:HA    | 1.94                     | 0.41              |
| 3:M:218:LEU:CB   | 3:M:442:GLN:O    | 2.69                     | 0.41              |
| 3:M:220:GLU:CD   | 3:M:439:TYR:HB2  | 2.41                     | 0.41              |
| 3:M:222:PHE:CB   | 3:M:240:ILE:HG12 | 2.51                     | 0.41              |
| 3:M:224:VAL:HB   | 3:M:479:PHE:HD1  | 1.84                     | 0.41              |
| 3:M:261:ASN:CG   | 3:M:262:THR:N    | 2.74                     | 0.41              |
| 3:M:356:LEU:HD21 | 3:M:358:ILE:HG12 | 1.99                     | 0.41              |
| 4:S:4:ALA:HB2    | 4:S:19:PHE:CD2   | 2.56                     | 0.41              |
| 4:S:117:ASN:CB   | 4:S:120:ASP:OD2  | 2.68                     | 0.41              |
| 4:S:127:THR:CG2  | 4:S:153:VAL:HG13 | 2.51                     | 0.41              |
| 1:A:104:ARG:HG3  | 1:A:145:ILE:CB   | 2.49                     | 0.41              |
| 1:A:154:ILE:HG22 | 1:A:191:GLN:CG   | 2.39                     | 0.41              |
| 1:A:180:LYS:HE3  | 4:S:156:LEU:CD1  | 2.50                     | 0.41              |
| 1:A:509:PRO:O    | 1:A:547:VAL:HG22 | 2.22                     | 0.41              |
| 1:A:563:CYS:SG   | 1:A:621:LEU:CG   | 3.08                     | 0.41              |
| 2:B:13:ASP:O     | 2:B:16:LYS:O     | 2.38                     | 0.41              |
| 2:B:95:THR:HA    | 2:B:134:LEU:HD23 | 2.02                     | 0.41              |
| 2:B:143:SER:O    | 2:B:179:LYS:CB   | 2.69                     | 0.41              |
| 2:B:151:ALA:HB3  | 2:B:188:TYR:CE1  | 2.56                     | 0.41              |
| 2:B:178:ILE:CD1  | 2:B:214:ALA:C    | 2.82                     | 0.41              |
| 2:B:309:LEU:HD13 | 2:B:309:LEU:HA   | 1.87                     | 0.41              |
| 2:B:336:ASN:CB   | 2:B:339:PHE:CD1  | 3.03                     | 0.41              |

*Continued on next page...*

*Continued from previous page...*

| Atom-1           | Atom-2           | Interatomic distance (Å) | Clash overlap (Å) |
|------------------|------------------|--------------------------|-------------------|
| 3:M:323:MET:CE   | 3:M:342:LEU:CG   | 2.99                     | 0.41              |
| 3:M:436:GLU:HG3  | 3:M:436:GLU:O    | 2.21                     | 0.41              |
| 1:A:100:LEU:HD23 | 4:S:162:SER:OG   | 2.20                     | 0.40              |
| 1:A:200:PHE:CZ   | 1:A:235:GLN:HB2  | 2.56                     | 0.40              |
| 1:A:316:LEU:HD11 | 1:A:348:PHE:CE2  | 2.43                     | 0.40              |
| 1:A:338:PHE:CE2  | 1:A:352:PHE:CE2  | 3.08                     | 0.40              |
| 1:A:376:GLU:CD   | 1:A:376:GLU:N    | 2.73                     | 0.40              |
| 1:A:594:PHE:CE1  | 2:B:434:LYS:CD   | 2.98                     | 0.40              |
| 2:B:102:HIS:CD2  | 2:B:123:LEU:HD21 | 2.56                     | 0.40              |
| 2:B:123:LEU:HB2  | 2:B:142:LEU:HD21 | 2.03                     | 0.40              |
| 2:B:159:LYS:CA   | 2:B:195:ILE:HD13 | 2.39                     | 0.40              |
| 2:B:170:ARG:O    | 2:B:171:GLY:C    | 2.58                     | 0.40              |
| 2:B:178:ILE:HA   | 2:B:178:ILE:HD13 | 1.89                     | 0.40              |
| 2:B:334:MET:C    | 2:B:336:ASN:N    | 2.73                     | 0.40              |
| 2:B:374:PHE:CD2  | 2:B:402:LEU:HD21 | 2.53                     | 0.40              |
| 2:B:518:ILE:O    | 2:B:518:ILE:CG1  | 2.69                     | 0.40              |
| 3:M:12:ASN:OD1   | 3:M:45:SER:OG    | 2.35                     | 0.40              |
| 3:M:66:PHE:HB3   | 3:M:77:LEU:HD21  | 1.78                     | 0.40              |
| 3:M:240:ILE:HG22 | 3:M:444:ALA:CA   | 2.51                     | 0.40              |
| 3:M:446:GLY:C    | 3:M:448:TYR:H    | 2.21                     | 0.40              |
| 3:M:478:ASN:C    | 3:M:479:PHE:O    | 2.59                     | 0.40              |
| 1:A:71:VAL:HG11  | 1:A:105:VAL:CB   | 2.51                     | 0.40              |
| 1:A:78:GLU:OE1   | 1:A:113:SER:HB3  | 2.20                     | 0.40              |
| 1:A:92:LEU:CD2   | 1:A:124:ALA:N    | 2.85                     | 0.40              |
| 1:A:92:LEU:HD22  | 1:A:123:LEU:CB   | 2.50                     | 0.40              |
| 1:A:141:VAL:HB   | 4:S:159:ALA:CA   | 2.46                     | 0.40              |
| 1:A:145:ILE:C    | 1:A:147:LEU:N    | 2.72                     | 0.40              |
| 1:A:182:ILE:HD13 | 1:A:218:ALA:N    | 2.37                     | 0.40              |
| 1:A:251:TRP:CD1  | 4:S:104:THR:HG23 | 2.55                     | 0.40              |
| 1:A:420:ILE:HG23 | 1:A:421:PRO:CD   | 2.48                     | 0.40              |
| 1:A:429:VAL:CG2  | 1:A:469:LEU:HD11 | 2.42                     | 0.40              |
| 1:A:461:CYS:O    | 1:A:463:ASP:N    | 2.49                     | 0.40              |
| 1:A:629:LEU:O    | 1:A:631:SER:N    | 2.52                     | 0.40              |
| 2:B:20:ARG:HH11  | 2:B:35:TYR:HE1   | 1.67                     | 0.40              |
| 2:B:37:TYR:O     | 2:B:40:GLN:C     | 2.59                     | 0.40              |
| 2:B:139:LEU:HD23 | 2:B:173:VAL:HA   | 0.42                     | 0.40              |
| 2:B:258:GLN:HA   | 2:B:258:GLN:OE1  | 2.21                     | 0.40              |
| 2:B:565:GLN:C    | 2:B:574:ASN:HD21 | 2.20                     | 0.40              |
| 3:M:292:PRO:HA   | 3:M:293:PRO:HD3  | 1.53                     | 0.40              |
| 3:M:360:LEU:CD1  | 3:M:433:VAL:CB   | 2.93                     | 0.40              |
| 3:M:433:VAL:O    | 3:M:435:LEU:HD12 | 2.21                     | 0.40              |

*Continued on next page...*

*Continued from previous page...*

| Atom-1           | Atom-2           | Interatomic distance (Å) | Clash overlap (Å) |
|------------------|------------------|--------------------------|-------------------|
| 4:S:90:ASP:C     | 4:S:92:GLN:H     | 2.25                     | 0.40              |
| 4:S:108:SER:OG   | 4:S:149:ILE:CG2  | 2.60                     | 0.40              |
| 1:A:102:GLN:CG   | 4:S:164:ASP:C    | 2.89                     | 0.40              |
| 1:A:104:ARG:CG   | 1:A:145:ILE:CD1  | 2.95                     | 0.40              |
| 1:A:231:GLN:CB   | 1:A:232:PRO:HD3  | 2.44                     | 0.40              |
| 1:A:247:ILE:HG21 | 1:A:252:ILE:CG2  | 2.52                     | 0.40              |
| 1:A:247:ILE:HG21 | 1:A:252:ILE:HB   | 2.03                     | 0.40              |
| 1:A:392:MET:CE   | 1:A:460:LEU:HD12 | 2.51                     | 0.40              |
| 1:A:535:ILE:O    | 1:A:536:MET:HG3  | 2.20                     | 0.40              |
| 2:B:208:ILE:HD13 | 2:B:240:LEU:HD11 | 2.04                     | 0.40              |
| 2:B:286:ILE:CG2  | 2:B:288:TYR:CE2  | 2.82                     | 0.40              |
| 2:B:306:LEU:O    | 2:B:309:LEU:HB2  | 2.21                     | 0.40              |
| 2:B:363:ILE:CG2  | 2:B:398:ILE:HD11 | 2.47                     | 0.40              |
| 2:B:566:ALA:HB2  | 2:B:581:TYR:CD2  | 2.56                     | 0.40              |
| 3:M:249:TYR:HE1  | 3:M:467:TYR:CZ   | 2.37                     | 0.40              |
| 3:M:320:ILE:CG2  | 3:M:439:TYR:OH   | 2.70                     | 0.40              |
| 3:M:376:ILE:HG22 | 3:M:379:LEU:CD1  | 2.51                     | 0.40              |
| 4:S:85:PHE:HZ    | 4:S:109:LEU:HD23 | 1.85                     | 0.40              |
| 1:A:84:MET:O     | 1:A:85:ALA:O     | 2.36                     | 0.40              |
| 1:A:125:THR:HA   | 1:A:158:LEU:HD13 | 2.04                     | 0.40              |
| 1:A:141:VAL:HG21 | 4:S:157:ASN:N    | 2.36                     | 0.40              |
| 1:A:149:GLY:C    | 1:A:151:SER:N    | 2.72                     | 0.40              |
| 1:A:150:LEU:CG   | 1:A:162:ILE:HG12 | 2.52                     | 0.40              |
| 1:A:174:ARG:HA   | 1:A:175:PRO:HD2  | 1.66                     | 0.40              |
| 1:A:175:PRO:CG   | 1:A:211:ASP:OD2  | 2.69                     | 0.40              |
| 1:A:259:LEU:C    | 1:A:259:LEU:HD23 | 2.41                     | 0.40              |
| 1:A:260:PHE:CZ   | 1:A:274:LEU:CG   | 3.04                     | 0.40              |
| 1:A:288:THR:HB   | 1:A:322:PHE:CZ   | 2.42                     | 0.40              |
| 1:A:313:MET:CA   | 1:A:348:PHE:CZ   | 3.02                     | 0.40              |
| 1:A:326:GLN:HA   | 1:A:331:ARG:NE   | 2.36                     | 0.40              |
| 1:A:359:LEU:HD22 | 1:A:367:ILE:HG21 | 2.03                     | 0.40              |
| 1:A:504:ILE:O    | 1:A:506:LYS:N    | 2.52                     | 0.40              |
| 1:A:557:LYS:HG2  | 2:B:606:ASP:N    | 2.36                     | 0.40              |
| 2:B:17:VAL:CB    | 3:M:119:ASP:OD2  | 2.69                     | 0.40              |
| 2:B:41:ASN:HD22  | 2:B:43:ASN:HA    | 1.87                     | 0.40              |
| 2:B:105:LEU:C    | 2:B:145:MET:CE   | 2.90                     | 0.40              |
| 2:B:132:SER:C    | 2:B:169:VAL:HG23 | 2.41                     | 0.40              |
| 2:B:171:GLY:O    | 2:B:174:ALA:HB3  | 2.22                     | 0.40              |
| 2:B:257:LYS:CA   | 2:B:260:LEU:HG   | 2.51                     | 0.40              |
| 2:B:278:PRO:HB3  | 2:B:289:PRO:O    | 2.22                     | 0.40              |
| 2:B:306:LEU:HD22 | 2:B:321:CYS:CB   | 2.52                     | 0.40              |

*Continued on next page...*

Continued from previous page...

| Atom-1           | Atom-2           | Interatomic distance (Å) | Clash overlap (Å) |
|------------------|------------------|--------------------------|-------------------|
| 2:B:319:LEU:O    | 2:B:321:CYS:N    | 2.55                     | 0.40              |
| 2:B:353:GLN:HE21 | 3:M:47:SER:CB    | 1.91                     | 0.40              |
| 2:B:542:PRO:O    | 2:B:607:ILE:HD13 | 2.22                     | 0.40              |
| 3:M:7:ILE:HG22   | 3:M:75:TRP:O     | 2.17                     | 0.40              |
| 3:M:104:PHE:O    | 3:M:105:ASP:CB   | 2.69                     | 0.40              |
| 4:S:87:PHE:CD1   | 4:S:87:PHE:N     | 2.89                     | 0.40              |
| 1:A:192:TYR:CD2  | 1:A:192:TYR:O    | 2.75                     | 0.40              |
| 1:A:220:SER:CB   | 4:S:142:ILE:CA   | 3.00                     | 0.40              |
| 1:A:220:SER:CB   | 4:S:142:ILE:HA   | 2.49                     | 0.40              |
| 1:A:566:PHE:CZ   | 1:A:618:THR:HB   | 2.53                     | 0.40              |
| 1:A:637:GLU:HB2  | 2:B:513:TRP:CG   | 2.57                     | 0.40              |
| 2:B:38:TYR:CA    | 2:B:42:ILE:H     | 2.13                     | 0.40              |
| 2:B:64:LYS:CG    | 2:B:100:LEU:CD1  | 2.98                     | 0.40              |
| 2:B:70:MET:CB    | 2:B:104:TYR:CE1  | 2.99                     | 0.40              |
| 2:B:84:ALA:O     | 2:B:87:VAL:HB    | 2.21                     | 0.40              |
| 2:B:200:MET:HE3  | 2:B:232:ARG:N    | 2.24                     | 0.40              |
| 2:B:361:GLN:HG2  | 2:B:394:TRP:CE2  | 2.56                     | 0.40              |
| 2:B:451:MET:CE   | 2:B:489:ILE:CG1  | 2.98                     | 0.40              |
| 3:M:220:GLU:HA   | 3:M:474:THR:CG2  | 2.50                     | 0.40              |
| 3:M:270:PRO:N    | 3:M:302:TYR:CD1  | 2.90                     | 0.40              |

There are no symmetry-related clashes.

## 5.3 Torsion angles [i](#)

### 5.3.1 Protein backbone [i](#)

In the following table, the Percentiles column shows the percent Ramachandran outliers of the chain as a percentile score with respect to all PDB entries followed by that with respect to all EM entries.

The Analysed column shows the number of residues for which the backbone conformation was analysed, and the total number of residues.

| Mol | Chain | Analysed        | Favoured   | Allowed   | Outliers | Percentiles |    |
|-----|-------|-----------------|------------|-----------|----------|-------------|----|
| 1   | A     | 574/964 (60%)   | 511 (89%)  | 39 (7%)   | 24 (4%)  | 3           | 22 |
| 2   | B     | 619/809 (76%)   | 474 (77%)  | 79 (13%)  | 66 (11%) | 0           | 8  |
| 3   | M     | 385/483 (80%)   | 315 (82%)  | 52 (14%)  | 18 (5%)  | 2           | 21 |
| 4   | S     | 166/194 (86%)   | 150 (90%)  | 12 (7%)   | 4 (2%)   | 6           | 33 |
| All | All   | 1744/2450 (71%) | 1450 (83%) | 182 (10%) | 112 (6%) | 3           | 16 |

All (112) Ramachandran outliers are listed below:

| Mol | Chain | Res | Type |
|-----|-------|-----|------|
| 1   | A     | 267 | GLU  |
| 1   | A     | 278 | ILE  |
| 1   | A     | 279 | LEU  |
| 1   | A     | 305 | GLU  |
| 1   | A     | 401 | VAL  |
| 1   | A     | 405 | THR  |
| 1   | A     | 440 | ASN  |
| 1   | A     | 441 | TYR  |
| 1   | A     | 449 | TRP  |
| 1   | A     | 507 | GLN  |
| 2   | B     | 14  | THR  |
| 2   | B     | 18  | ILE  |
| 2   | B     | 19  | THR  |
| 2   | B     | 43  | ASN  |
| 2   | B     | 78  | ASP  |
| 2   | B     | 154 | ILE  |
| 2   | B     | 156 | HIS  |
| 2   | B     | 176 | ALA  |
| 2   | B     | 177 | ILE  |
| 2   | B     | 179 | LYS  |
| 2   | B     | 192 | LEU  |
| 2   | B     | 194 | ASP  |
| 2   | B     | 196 | LEU  |
| 2   | B     | 197 | LYS  |
| 2   | B     | 198 | GLU  |
| 2   | B     | 200 | MET  |
| 2   | B     | 215 | TYR  |
| 2   | B     | 218 | CYS  |
| 2   | B     | 228 | GLY  |
| 2   | B     | 261 | PRO  |
| 2   | B     | 274 | PRO  |
| 2   | B     | 287 | GLU  |
| 2   | B     | 296 | ASP  |
| 2   | B     | 436 | LEU  |
| 2   | B     | 558 | TYR  |
| 2   | B     | 560 | ILE  |
| 2   | B     | 561 | ASP  |
| 2   | B     | 564 | LYS  |
| 2   | B     | 565 | GLN  |
| 2   | B     | 568 | VAL  |
| 2   | B     | 578 | PRO  |
| 2   | B     | 583 | PHE  |

*Continued on next page...*

*Continued from previous page...*

| <b>Mol</b> | <b>Chain</b> | <b>Res</b> | <b>Type</b> |
|------------|--------------|------------|-------------|
| 3          | M            | 105        | ASP         |
| 3          | M            | 282        | VAL         |
| 3          | M            | 352        | GLN         |
| 3          | M            | 447        | ILE         |
| 3          | M            | 470        | ALA         |
| 4          | S            | 50         | PHE         |
| 1          | A            | 116        | LYS         |
| 1          | A            | 126        | ASN         |
| 1          | A            | 174        | ARG         |
| 1          | A            | 536        | MET         |
| 2          | B            | 3          | ASP         |
| 2          | B            | 29         | LYS         |
| 2          | B            | 135        | ARG         |
| 2          | B            | 144        | ASP         |
| 2          | B            | 158        | VAL         |
| 2          | B            | 178        | ILE         |
| 2          | B            | 199        | LEU         |
| 2          | B            | 227        | HIS         |
| 2          | B            | 332        | LEU         |
| 2          | B            | 383        | VAL         |
| 2          | B            | 432        | ALA         |
| 3          | M            | 45         | SER         |
| 3          | M            | 72         | LEU         |
| 3          | M            | 82         | LYS         |
| 3          | M            | 316        | ARG         |
| 3          | M            | 317        | MET         |
| 3          | M            | 429        | ASP         |
| 1          | A            | 256        | LEU         |
| 1          | A            | 421        | PRO         |
| 1          | A            | 571        | ARG         |
| 1          | A            | 608        | ARG         |
| 2          | B            | 15         | ALA         |
| 2          | B            | 38         | TYR         |
| 2          | B            | 232        | ARG         |
| 2          | B            | 337        | THR         |
| 2          | B            | 503        | LEU         |
| 2          | B            | 538        | SER         |
| 2          | B            | 590        | GLN         |
| 3          | M            | 86         | PRO         |
| 3          | M            | 254        | PRO         |
| 3          | M            | 355        | ASP         |
| 1          | A            | 306        | GLU         |

*Continued on next page...*

*Continued from previous page...*

| Mol | Chain | Res | Type |
|-----|-------|-----|------|
| 1   | A     | 406 | GLY  |
| 2   | B     | 213 | LEU  |
| 2   | B     | 222 | HIS  |
| 2   | B     | 260 | LEU  |
| 2   | B     | 523 | PHE  |
| 2   | B     | 600 | LYS  |
| 3   | M     | 118 | TYR  |
| 3   | M     | 363 | ASN  |
| 4   | S     | 15  | ARG  |
| 4   | S     | 81  | ALA  |
| 1   | A     | 419 | ILE  |
| 2   | B     | 20  | ARG  |
| 2   | B     | 142 | LEU  |
| 2   | B     | 535 | GLN  |
| 2   | B     | 573 | GLU  |
| 3   | M     | 57  | GLY  |
| 1   | A     | 302 | ASN  |
| 1   | A     | 439 | ASP  |
| 2   | B     | 37  | TYR  |
| 2   | B     | 155 | LEU  |
| 2   | B     | 372 | THR  |
| 2   | B     | 42  | ILE  |
| 2   | B     | 542 | PRO  |
| 3   | M     | 268 | GLY  |
| 2   | B     | 8   | ILE  |
| 2   | B     | 347 | VAL  |
| 4   | S     | 26  | PRO  |
| 1   | A     | 601 | VAL  |

### 5.3.2 Protein sidechains [i](#)

In the following table, the Percentiles column shows the percent sidechain outliers of the chain as a percentile score with respect to all PDB entries followed by that with respect to all EM entries.

The Analysed column shows the number of residues for which the sidechain conformation was analysed, and the total number of residues.

| Mol | Chain | Analysed      | Rotameric | Outliers | Percentiles |    |
|-----|-------|---------------|-----------|----------|-------------|----|
| 1   | A     | 536/898 (60%) | 527 (98%) | 9 (2%)   | 60          | 78 |
| 2   | B     | 564/738 (76%) | 548 (97%) | 16 (3%)  | 43          | 65 |
| 3   | M     | 353/441 (80%) | 342 (97%) | 11 (3%)  | 40          | 62 |

*Continued on next page...*



*Continued from previous page...*

| Mol | Chain | Analysed        | Rotameric  | Outliers | Percentiles |    |
|-----|-------|-----------------|------------|----------|-------------|----|
| 4   | S     | 157/175 (90%)   | 155 (99%)  | 2 (1%)   | 69          | 81 |
| All | All   | 1610/2252 (72%) | 1572 (98%) | 38 (2%)  | 51          | 69 |

All (38) residues with a non-rotameric sidechain are listed below:

| Mol | Chain | Res | Type |
|-----|-------|-----|------|
| 1   | A     | 175 | PRO  |
| 1   | A     | 186 | PHE  |
| 1   | A     | 196 | LEU  |
| 1   | A     | 241 | TYR  |
| 1   | A     | 288 | THR  |
| 1   | A     | 292 | TYR  |
| 1   | A     | 376 | GLU  |
| 1   | A     | 418 | ILE  |
| 1   | A     | 439 | ASP  |
| 2   | B     | 1   | MET  |
| 2   | B     | 4   | SER  |
| 2   | B     | 10  | SER  |
| 2   | B     | 12  | LEU  |
| 2   | B     | 14  | THR  |
| 2   | B     | 16  | LYS  |
| 2   | B     | 19  | THR  |
| 2   | B     | 29  | LYS  |
| 2   | B     | 30  | LEU  |
| 2   | B     | 233 | TYR  |
| 2   | B     | 261 | PRO  |
| 2   | B     | 285 | GLU  |
| 2   | B     | 352 | ASN  |
| 2   | B     | 418 | TYR  |
| 2   | B     | 453 | TRP  |
| 2   | B     | 592 | TYR  |
| 3   | M     | 68  | VAL  |
| 3   | M     | 100 | LEU  |
| 3   | M     | 118 | TYR  |
| 3   | M     | 214 | LEU  |
| 3   | M     | 293 | PRO  |
| 3   | M     | 343 | ASN  |
| 3   | M     | 352 | GLN  |
| 3   | M     | 437 | TYR  |
| 3   | M     | 439 | TYR  |
| 3   | M     | 472 | TYR  |
| 3   | M     | 479 | PHE  |

*Continued on next page...*

*Continued from previous page...*

| Mol | Chain | Res | Type |
|-----|-------|-----|------|
| 4   | S     | 38  | LEU  |
| 4   | S     | 47  | GLN  |

Sometimes sidechains can be flipped to improve hydrogen bonding and reduce clashes. All (26) such sidechains are listed below:

| Mol | Chain | Res | Type |
|-----|-------|-----|------|
| 1   | A     | 101 | GLN  |
| 1   | A     | 102 | GLN  |
| 1   | A     | 199 | ASN  |
| 1   | A     | 235 | GLN  |
| 1   | A     | 345 | ASN  |
| 1   | A     | 440 | ASN  |
| 1   | A     | 462 | GLN  |
| 1   | A     | 565 | ASN  |
| 2   | B     | 41  | ASN  |
| 2   | B     | 156 | HIS  |
| 2   | B     | 307 | ASN  |
| 2   | B     | 333 | GLN  |
| 2   | B     | 352 | ASN  |
| 2   | B     | 441 | GLN  |
| 2   | B     | 486 | HIS  |
| 2   | B     | 547 | GLN  |
| 2   | B     | 567 | GLN  |
| 2   | B     | 574 | ASN  |
| 3   | M     | 17  | GLN  |
| 3   | M     | 117 | ASN  |
| 3   | M     | 241 | HIS  |
| 3   | M     | 326 | HIS  |
| 3   | M     | 343 | ASN  |
| 3   | M     | 346 | ASN  |
| 4   | S     | 47  | GLN  |
| 4   | S     | 103 | GLN  |

### 5.3.3 RNA [i](#)

There are no RNA molecules in this entry.

### 5.4 Non-standard residues in protein, DNA, RNA chains [i](#)

There are no non-standard protein/DNA/RNA residues in this entry.

## 5.5 Carbohydrates [i](#)

There are no monosaccharides in this entry.

## 5.6 Ligand geometry [i](#)

There are no ligands in this entry.

## 5.7 Other polymers [i](#)

There are no such residues in this entry.

## 5.8 Polymer linkage issues [i](#)

There are no chain breaks in this entry.

## 6 Map visualisation [i](#)

This section contains visualisations of the EMDB entry EMD-13189. These allow visual inspection of the internal detail of the map and identification of artifacts.

No raw map or half-maps were deposited for this entry and therefore no images, graphs, etc. pertaining to the raw map can be shown.

### 6.1 Orthogonal projections [i](#)

#### 6.1.1 Primary map

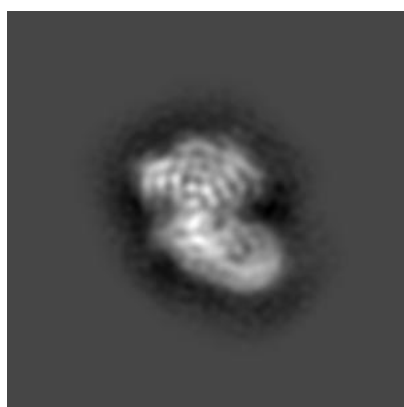

X

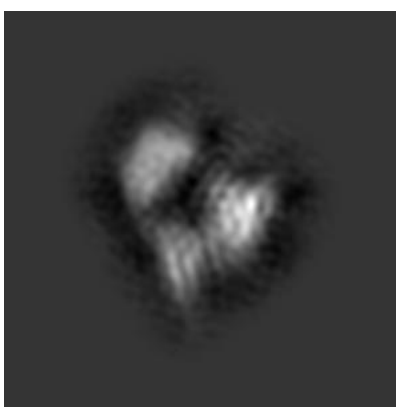

Y

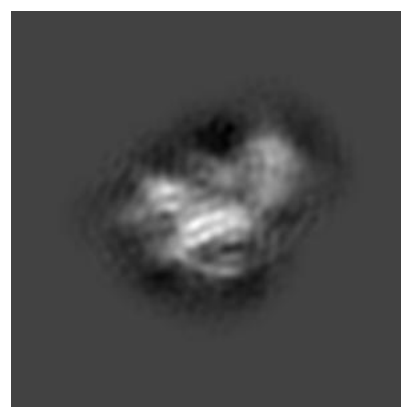

Z

The images above show the map projected in three orthogonal directions.

### 6.2 Central slices [i](#)

#### 6.2.1 Primary map

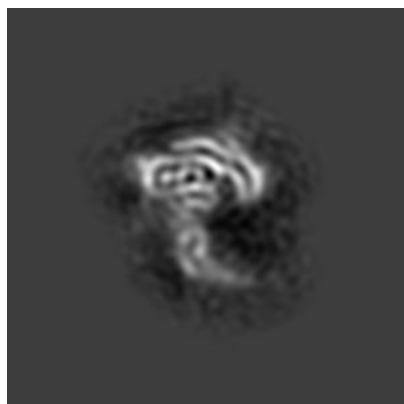

X Index: 132

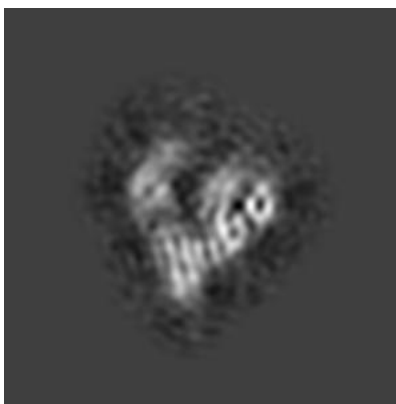

Y Index: 132

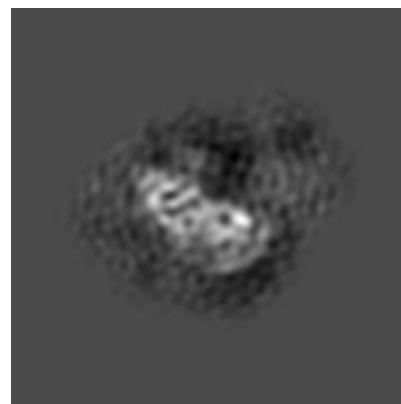

Z Index: 132

The images above show central slices of the map in three orthogonal directions.

## 6.3 Largest variance slices [i](#)

### 6.3.1 Primary map

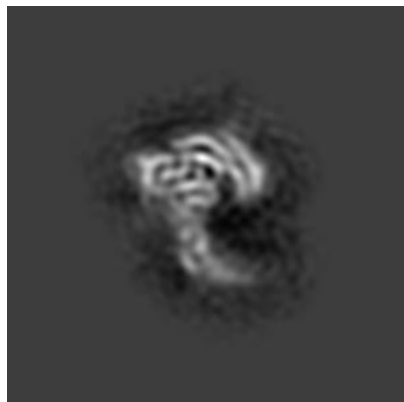

X Index: 134

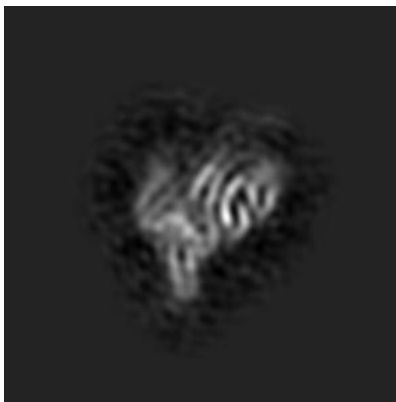

Y Index: 123

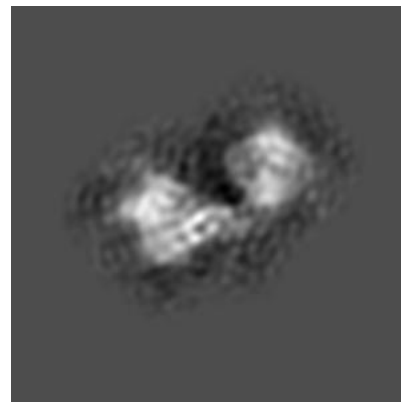

Z Index: 112

The images above show the largest variance slices of the map in three orthogonal directions.

## 6.4 Orthogonal surface views [i](#)

### 6.4.1 Primary map

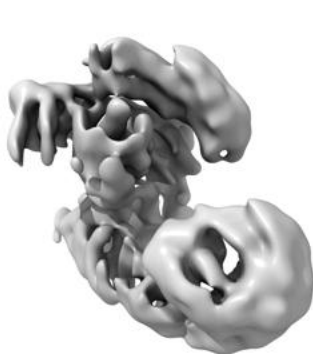

X

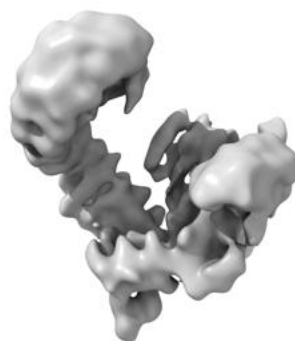

Y

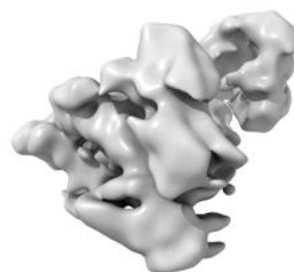

Z

The images above show the 3D surface view of the map at the recommended contour level 0.0155. These images, in conjunction with the slice images, may facilitate assessment of whether an appropriate contour level has been provided.

## 6.5 Mask visualisation

This section was not generated. No masks/segmentation were deposited.

## 7 Map analysis [i](#)

This section contains the results of statistical analysis of the map.

### 7.1 Map-value distribution [i](#)

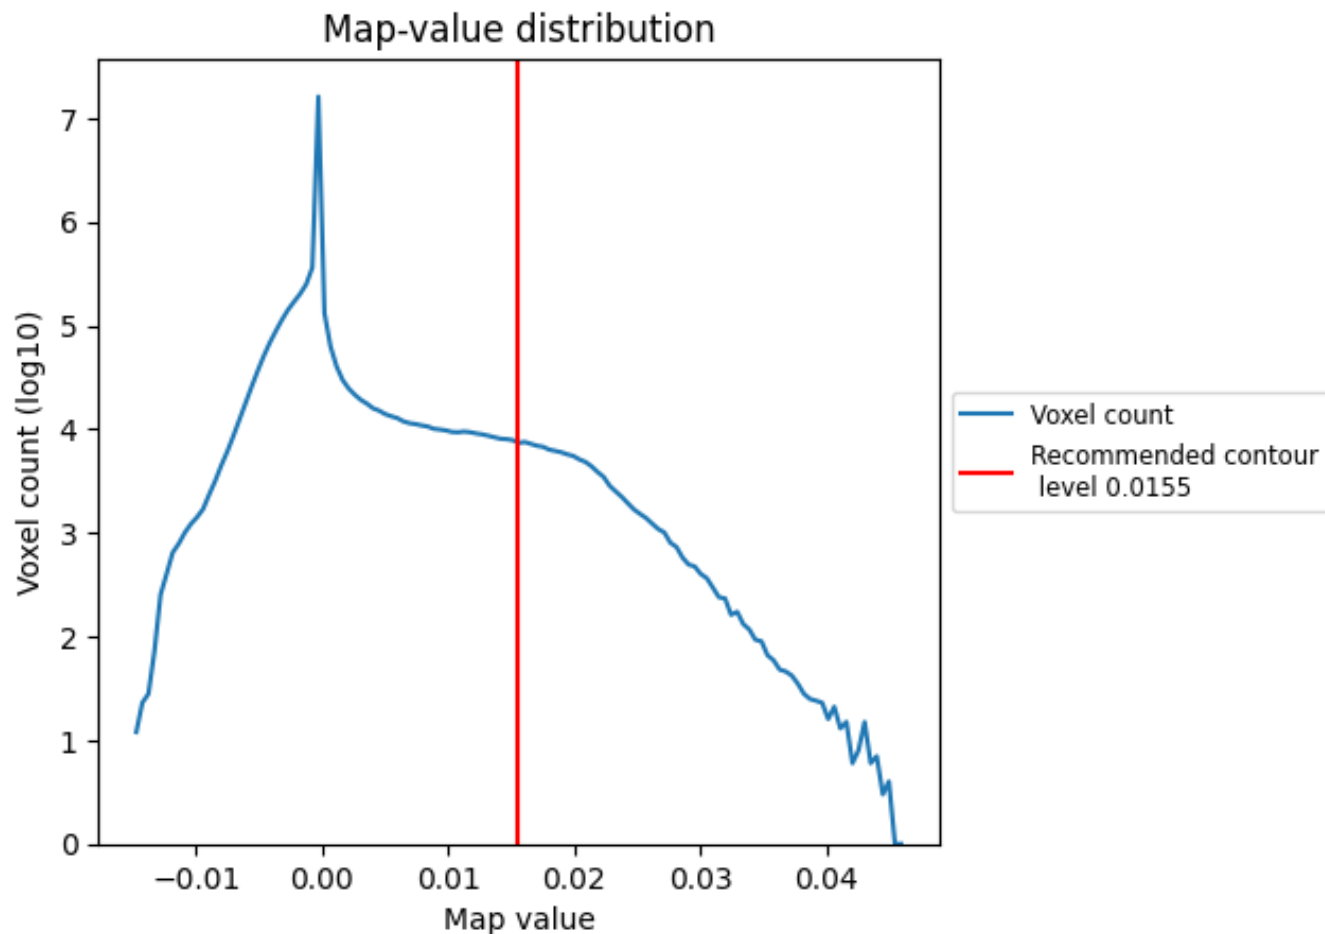

The map-value distribution is plotted in 128 intervals along the x-axis. The y-axis is logarithmic. A spike in this graph at zero usually indicates that the volume has been masked.

## 7.2 Volume estimate [i](#)

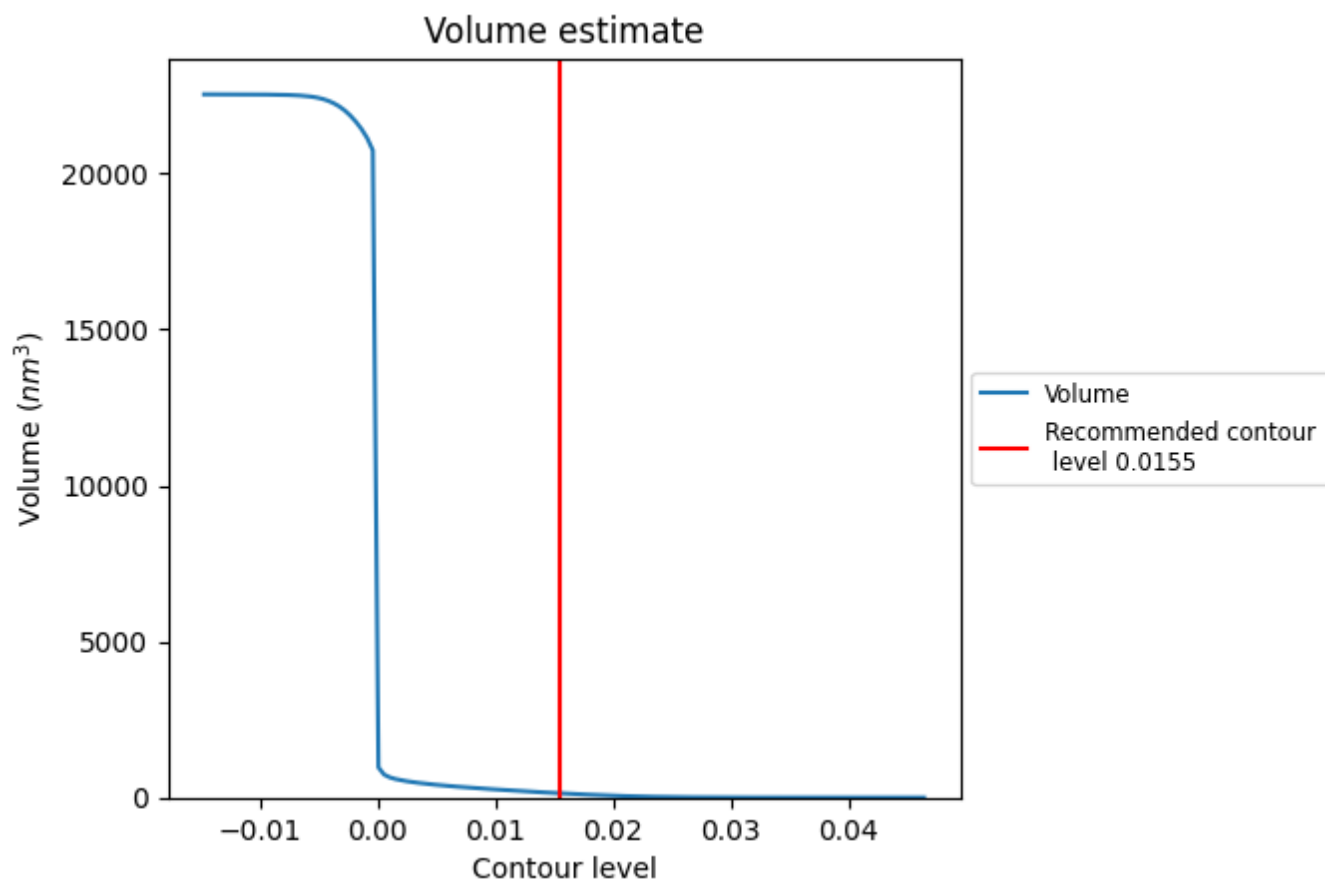

The volume at the recommended contour level is 137  $\text{nm}^3$ ; this corresponds to an approximate mass of 124 kDa.

The volume estimate graph shows how the enclosed volume varies with the contour level. The recommended contour level is shown as a vertical line and the intersection between the line and the curve gives the volume of the enclosed surface at the given level.



### 7.3 Rotationally averaged power spectrum [i](#)

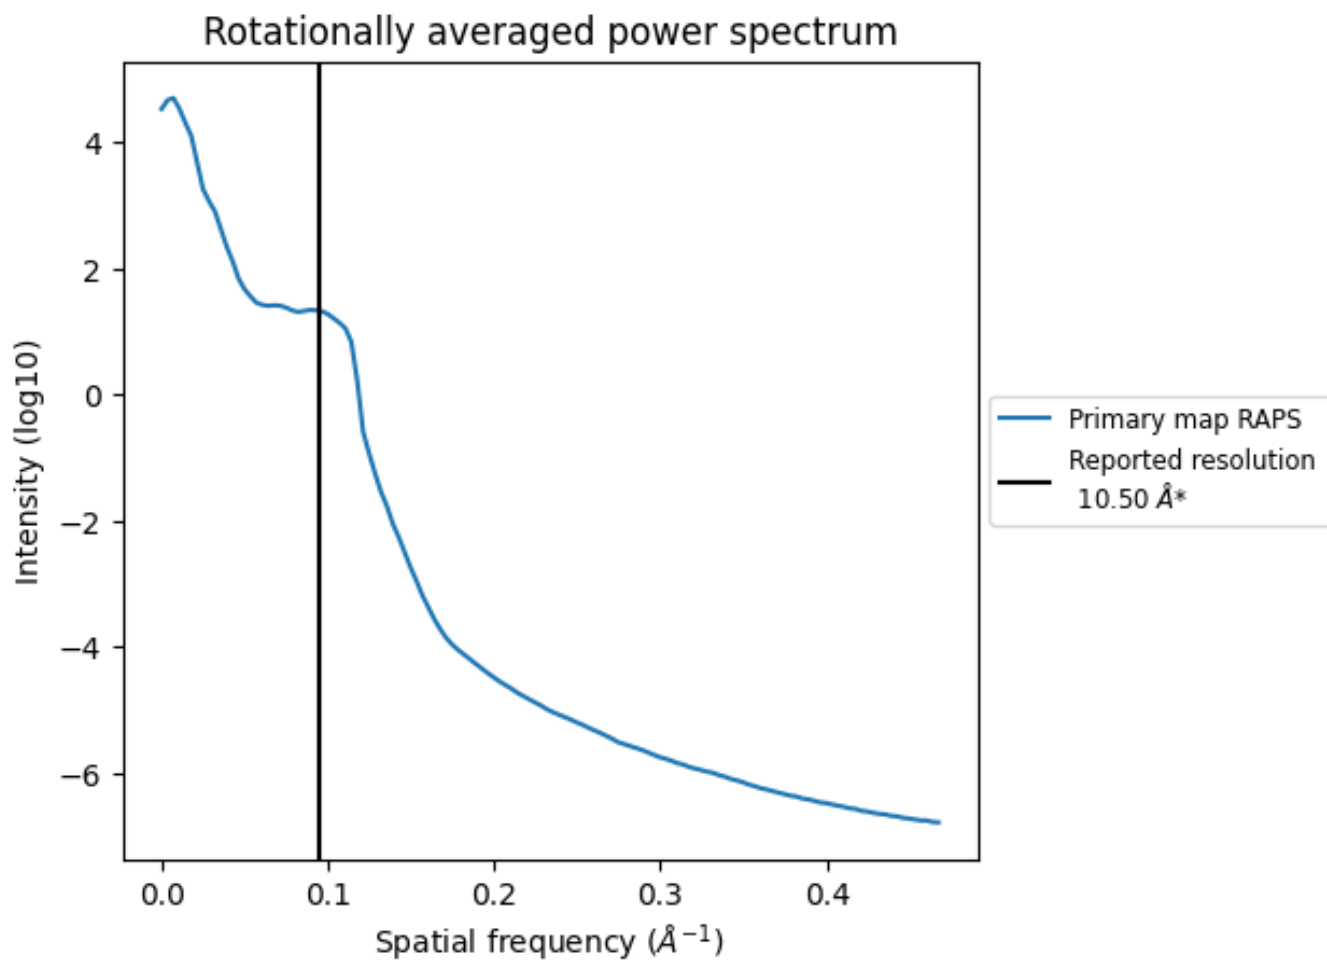

\*Reported resolution corresponds to spatial frequency of  $0.095 \text{\AA}^{-1}$

## 8 Fourier-Shell correlation

This section was not generated. No FSC curve or half-maps provided.

## 9 Map-model fit [i](#)

This section contains information regarding the fit between EMDB map EMD-13189 and PDB model 7P3Z. Per-residue inclusion information can be found in section 3 on page 5.

### 9.1 Map-model overlay [i](#)

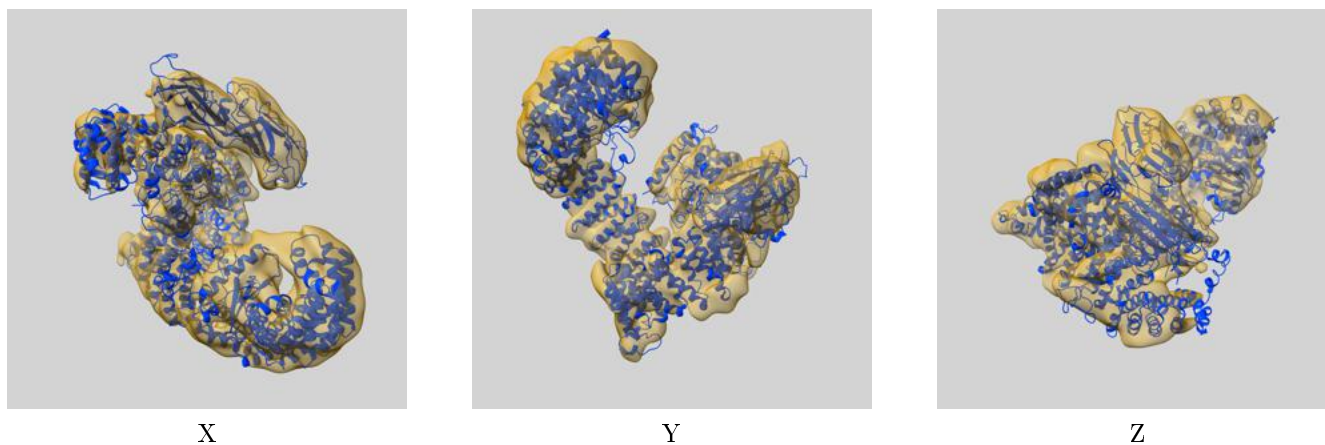

The images above show the 3D surface view of the map at the recommended contour level 0.0155 at 50% transparency in yellow overlaid with a ribbon representation of the model coloured in blue. These images allow for the visual assessment of the quality of fit between the atomic model and the map.

## 9.2 Atom inclusion [i](#)

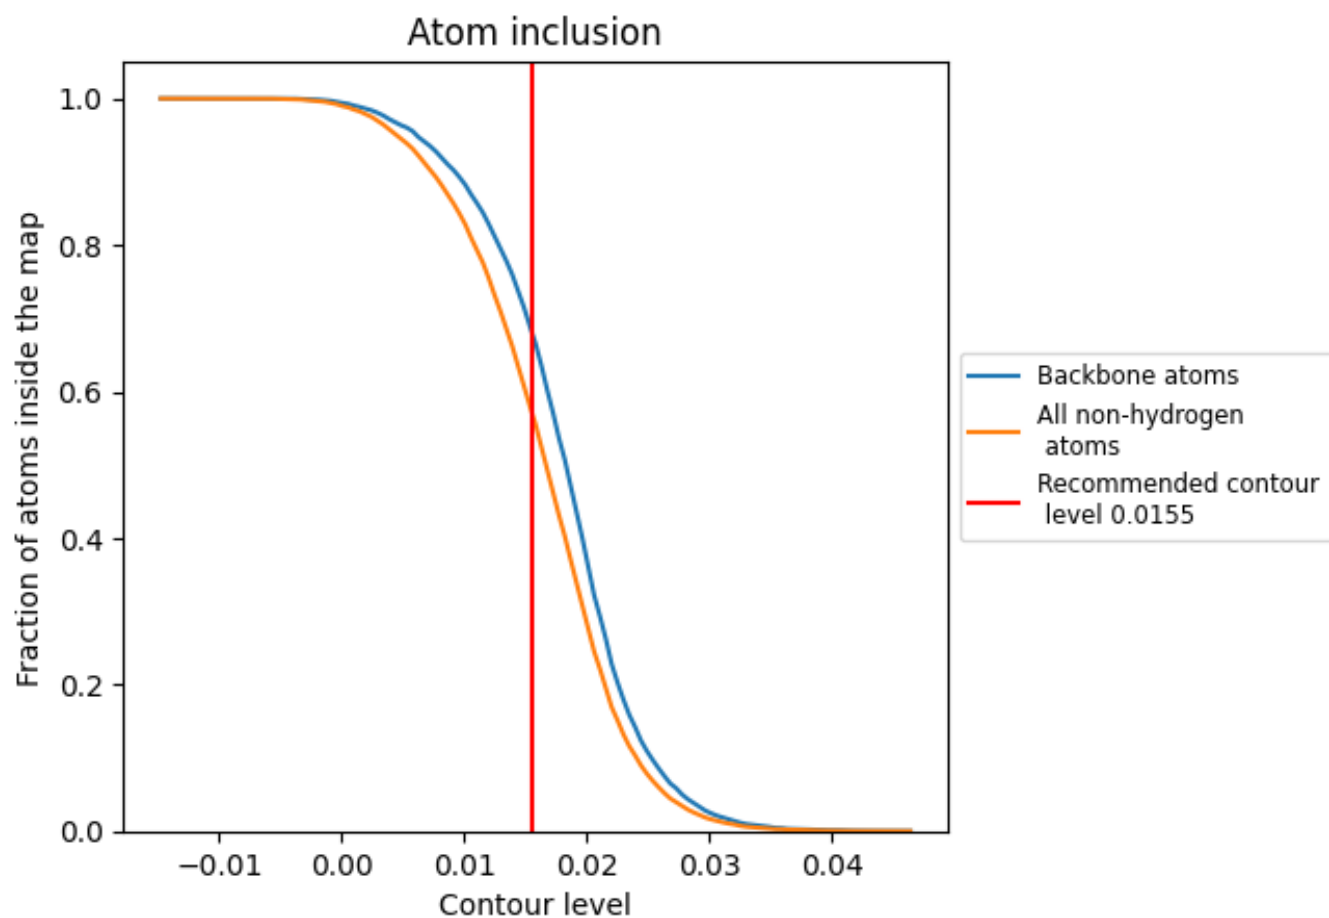

At the recommended contour level, 68% of all backbone atoms, 57% of all non-hydrogen atoms, are inside the map.
